# Supplementary material for: Factors associated with disease severity and mortality among patients with COVID-19: A systematic review and meta-analysis
Source: PubMed Central journal article supplement (PMC7673562; doi:10.1371/journal.pone.0241541), 2020-11-18
Supplement: pone.0241541.s001.pdf [file pone.0241541.s001.pdf]

# SUPPLEMENTARY APPENDIX

| <b>Section</b> | <b>Content</b>                                                                                                                  | <b>Page</b> |
|----------------|---------------------------------------------------------------------------------------------------------------------------------|-------------|
| <b>I</b>       | Search Strategy                                                                                                                 | 3           |
| <b>II</b>      | A) Study Characteristics that compared patients who died with those who survived (Supplementary table S1)                       | 4           |
|                | B) Study Characteristics that compared patients with severe disease with those with non-severe disease (Supplementary table S2) | 7           |
| <b>III</b>     | Quality assessment (Supplementary tables 3 and 4)                                                                               | 12          |
| <b>IV</b>      | Subgroup analysis based on the inclusion of only critically ill or all COVID-19 patients as study participants                  | 17          |
| <b>V</b>       | Supplementary figures (Forest and funnel plots 1-121)                                                                           | 18          |
| <b>VI</b>      | Supplementary figures (Bubble plot 122-165)                                                                                     | 147         |
| <b>VII</b>     | Definitions                                                                                                                     | 192         |
| <b>VIII</b>    | References                                                                                                                      | 193         |

# Section I

## Search Strategy

### PubMed Search Strategy

"COVID-19" [Supplementary Concept] OR "severe acute respiratory syndrome coronavirus 2" [Supplementary Concept] OR 2019 novel coronavirus [tw] OR SARS2 [tw] OR coronavirus disease-19 OR COVID-19 [tw] OR "COVID 19"[tw] OR "COVID19"[tw] OR "COVID2019"[tw] OR "COVID 2019"[tw] OR "COVID-2019"[tw] OR "novel coronavirus"[tw] OR "new coronavirus"[tw] OR "novel corona virus"[tw] OR "new corona virus"[tw] OR "SARS-CoV-2"[tw] OR "SARSCoV2"[tw] OR "SARS-CoV2"[tw] OR "2019nCoV"[tw] OR "2019-nCoV"[tw] OR "2019 coronavirus"[tw] OR "2019 corona virus"[tw] OR "coronavirus disease 2019"[tw] OR "severe acute respiratory syndrome coronavirus 2"[nm] OR "severe acute respiratory syndrome coronavirus 2"[tw] OR "sars-coronavirus-2"[tw] OR "coronavirus disease 2019"[tw] OR "corona virus disease 2019"[tw] OR (wuhan[tw] AND ("2019/01/01"[PDAT]: "3000/12/31"[PDAT]))

### Embase Search Strategy

'2019 novel coronavirus'/exp OR SARS2:ab,ti,kw OR 'Wuhan coronavirus':ab,ti,kw OR 'Wuhan seafood market pneumonia virus':ab,ti,kw OR coronavirus disease-19:ab,ti,kw OR COVID-19:ab,ti,kw OR 'COVID 19':ab,ti,kw OR 'COVID19':ab,ti,kw OR 'COVID2019':ab,ti,kw OR 'COVID 2019':ab,ti,kw OR 'COVID-2019':ab,ti,kw OR 'novel coronavirus':ab,ti,kw OR 'new coronavirus':ab,ti,kw OR 'novel corona virus':ab,ti,kw OR 'new corona virus':ab,ti,kw OR 'SARS-CoV-2 ':ab,ti,kw OR 'SARSCoV2':ab,ti,kw OR 'SARS-CoV2:ab,ti,kw' OR '2019nCo:ab,ti,kw V':ab,ti,kw OR '2019-nCoV':ab,ti,kw OR '2019 coronavirus':ab,ti,kw OR '2019 corona virus':ab,ti,kw OR 'coronavirus disease 2019':ab,ti,kw OR 'severe acute respiratory syndrome coronavirus 2':ab,ti,kw OR 'severe acute respiratory syndrome coronavirus 2':ab,ti,kw OR 'sars-coronavirus-2':ab,ti,kw OR 'coronavirus disease 2019':ab,ti,kw OR 'corona virus disease 2019':ab,ti,kw OR (wuhan:ti,ab,kw AND [2019-2020]/py)

## Section II

**A) Supplementary Table S1: Study characteristics for the studies that compared patients who died with those who survived.**

| <b>Name of the Author</b> | <b>Study duration</b>     | <b>Month and year of publication</b> | <b>Study design</b>  | <b>Country of study</b> | <b>Study setting, City/Province</b>                      | <b>Patient characteristics</b>   | <b>Number of participants</b> | <b>Age Mean (SD) / Mean*[IQR]</b> | <b>Male: Female</b> | <b>Time of laboratory assessment</b> | <b>Time of Radiological assessment</b> |
|---------------------------|---------------------------|--------------------------------------|----------------------|-------------------------|----------------------------------------------------------|----------------------------------|-------------------------------|-----------------------------------|---------------------|--------------------------------------|----------------------------------------|
| Xiaobo Yang(1)            | 24 Dec 2019 – 9 Feb 2020  | Feb 2020                             | Retrospective Cohort | China                   | Jin Yin-tan hospital, Wuhan                              | Critically ill patients          | 52                            | 59.7 (13.3)                       | 35:17               | Admission                            | -                                      |
| Tao Chen(2)               | 13 Jan 2020 – 28 Feb 2020 | Mar 2020                             | Retrospective Cohort | China                   | Tongji Hospital, Wuhan                                   | Moderate to critically ill       | 274                           | 62* [44 -70]                      | 171:103             | Admission                            | Admission                              |
| Ning Tang(3)              | 1 Jan 2020 – 13 Feb 2020  | Feb 2020                             | Retrospective Cohort | China                   | Tongji Hospital, Wuhan                                   | All confirmed case of COVID-19   | 183                           | 54.1 (16.2)                       | 98:85               | Admission                            | -                                      |
| Qiurong Ruan(4)           | NA                        | Mar 2020                             | Retrospective Cohort | China                   | Jin Yin-tan hospital and Tongji hospital, Wuhan          | All confirmed case of COVID-19   | 150                           | NA                                | NA                  | Timeline NA                          | -                                      |
| Chaomin Wu(5)             | 25 Dec 2019 – 26 Jan 2020 | Mar 2020                             | Retrospective Cohort | China                   | Jin Yin-tan hospital, Wuhan                              | All confirmed case of COVID-19   | 84                            | 51* [43-60]                       | 60:24               | Admission                            | Admission                              |
| Yang-kai Li(6)            | 1 Jan 2020 – 3 Mar 2020   | Mar 2020                             | Retrospective Cohort | China                   | Tongji Hospital, Wuhan                                   | From Thoracic surgery department | 25                            | 48.4 (14.4)                       | 12:13               | Timeline NA                          | -                                      |
| Yan Deng(7)               | 1 Jan 2020 – 21 Feb 2020  | Mar 2020                             | Retrospective Cohort | China                   | Tongji Hospital, Wuhan                                   | All confirmed case of COVID-19   | 225                           | NA                                | 124:104             | Admission                            | -                                      |
| Mingli Yuan(8)            | 1 Jan 2020 – 25 Jan 2020  | Mar 2020                             | Retrospective Cohort | China                   | Hubei Public Health Clinical Center, Hubei Province      | All confirmed case of COVID-19   | 27                            | 60* [47 - 69]                     | 12:15               | -                                    | Admission                              |
| Fei Zhou(9)               | 29 Dec 2019 – 31 Jan 2020 | Mar 2020                             | Retrospective Cohort | China                   | Jin Yin-tan hospital and Wuhan Pulmonary Hospital, Wuhan | All confirmed case of COVID-19   | 191                           | 56* [46 - 67]                     | 119:72              | Admission                            | Admission                              |
| Jianlei Cao(10)           | 3 Jan 2020 – 1 Feb 2020   | Mar 2020                             | Retrospective Cohort | China                   | Wuhan University Zhongnan Hospital, Wuhan                | All confirmed case of COVID-19   | 102                           | 54* [37-67]                       | 53:49               | Admission                            | Admission                              |
| Rong-Hui Du(11)           | 25 Dec 2019 – 7 Feb 2020  | Mar 2020                             | Prospective Cohort   | China                   | Wuhan Pulmonary Hospital, Wuhan                          | All confirmed case of COVID-19   | 179                           | 57.6 (13.7)                       | 97:82               | Timeline NA                          | -                                      |
| Wen-Jun Tu(12)            | 3 Jan 2019 – 24 Feb 2020  | Apr 2020                             | Retrospective Cohort | China                   | Wuhan University Zhongnan Hospital, Wuhan                | All confirmed case of COVID-19   | 174                           | 70* [64-80]                       | 79:95               | Admission                            | -                                      |
| Lang Wang(13)             | 1 Jan 2020 – 5 Mar 2020   | Apr 2020                             | Retrospective Cohort | China                   | Renmin Hospital of Wuhan University, Wuhan               | Elderly patients                 | 339                           | 69* [65, 76]                      | 173:166             | Timeline NA                          | -                                      |

|                       |                            |          |                      |                                     |                                                                                                                                |                                                                                                                   |      |               |           |             |             |
|-----------------------|----------------------------|----------|----------------------|-------------------------------------|--------------------------------------------------------------------------------------------------------------------------------|-------------------------------------------------------------------------------------------------------------------|------|---------------|-----------|-------------|-------------|
| Yang Wang(14)         | 25 Jan 2020 – 25 Feb 2020  | Apr 2020 | Retrospective Cohort | China                               | Tongji Hospital, Wuhan                                                                                                         | Critically ill patients                                                                                           | 344  | 64* [52-72]   | 179:165   | Admission   | Admission   |
| Mengyuan Dai(15)      | 1 Jan 2020 - 24 Feb 2020   | Apr 2020 | Retrospective Cohort | China                               | Multicenter study, Wuhan                                                                                                       | All confirmed case of COVID-19                                                                                    | 641  | 64* [57-71]   | 57:48     | -           | -           |
| Ming Ding(16)         | 1 Jan 2020 – 20 Mar 2020   | Apr 2020 | Retrospective Cohort | China                               | Huang-shi Traditional Chinese Medicine Hospital, Hubei Province                                                                | All confirmed case of COVID-19                                                                                    | 32   | 63 (16)       | 13:19     | Admission   | -           |
| Helena Barrasaa(17)   | 4 Mar 2020 - 31 Mar 2020   | Apr 2020 | Prospective Cohort   | Spain                               | University Hospital Araba, Vitoria                                                                                             | ICU patients                                                                                                      | 48   | 63 (12)       | 27:21     | Admission   | -           |
| TieLong Chen(18)      | 1 Jan 2020 - 10 Feb 2020.  | Apr 2020 | Retrospective Cohort | China                               | Zhongnan Hospital, Wuhan                                                                                                       | All confirmed case of COVID-19                                                                                    | 203  | 54* [41–68]   | 108:95    | Admission   | Admission   |
| Hernando Trujillo(19) | NA                         | May 2020 | Retrospective Cohort | Spain                               |                                                                                                                                | Patients with end- stage renal disease on dialysis (n=25) and renal transplantation (n=26) who developed COVID-19 | 51   | 64(15)        | 29:22     | Admission   | Admission   |
| Gwilym Webb (20)      | Till 22 Apr 2020           | Apr 2020 | Retrospective Cohort | Americas, China, Japan, South Korea | Multi-center, from 21 countries                                                                                                | All confirmed case of COVID-19                                                                                    | 39   | 58* [50-64]   | NA        | Admission   | -           |
| Qingchun Yao(21)      | 30 Jan 2020 to 11 Feb 2020 | Apr 2020 | Retrospective Cohort | China                               | Dabieshan Medical Center, Huanggang, Hubei province                                                                            | All confirmed case of COVID-19                                                                                    | 108  | 52 * [37-58]  | 43:65     | Admission   | Admission   |
| Jia-Fu Wei(22)        | Jan 2020 - 10 Mar 2020     | Apr 2020 | Prospective Cohort   | China                               | Two designated covid-19 treatment centers in Sichuan                                                                           | All confirmed COVID-19<br>All confirmed case of COVID-19                                                          | 101  | 49 [34 - 62]  | NA        | Admission   | Admission   |
| Jennifer Tomlins(23)  | 10 Mar 2020 - 30 Mar 2020  | Apr 2020 | Retrospective cohort | United Kingdom                      | North Bristol NHS Trust, a large, regional teaching hospital in the UK.                                                        | All confirmed case of COVID-19                                                                                    | 95   | 75* [59-82]   | 60:35     | Timeline NA | Timeline NA |
| Xiaobo Yang(24)       | Till 25 Feb 2020           | Apr 2020 | Retrospective cohort | China                               | Jin Yin-tan Hospital, Wuhan                                                                                                    | All confirmed case of COVID-19                                                                                    | 1476 | 57 [47-67]    | 776:700   | Timeline NA | -           |
| Rongrong Yang (25)    | 11 Jan 2020 - 16 Mar 2020  | Apr 2020 | Retrospective Cohort | China                               | Zhongnan Hospital of Wuhan University, Wuhan                                                                                   | All confirmed case of COVID-19                                                                                    | 212  | 55.6* [40–67] | 107:105   | -           | -           |
| Safiya Richardson(26) | 1 Mar 2020 – 4 Apr 2020    | Apr 2020 | Prospective Cohort   | United States                       | Multi-center, 12 hospitals in New York City, Long Island, and Westchester County, New York, within the Northwell Health system | All confirmed case of COVID-19                                                                                    | 5700 | 63* [52-75]   | 3437:2263 | Admission   | -           |
| Jeremy Gold(27)       | March 2020                 | Apr 2020 | Prospective Cohort   | United States                       | 8 Georgia hospitals (7 in metropolitan Atlanta and 1 in Southern Georgia)                                                      | All confirmed case of COVID-19                                                                                    | 305  | 60* [46–69]   | 151:154   | -           | -           |
| Lei Gao(28)           | NA                         | Apr 2020 | Retrospective Cohort | China                               | Hubei general Hospital, Hubei Province                                                                                         | All confirmed case of COVID-19                                                                                    | 54   | 60.4 (16.1)   | NA        | Admission   | -           |

|                           |                             |          |                      |               |                                                                                    |                                                                                                                              |      |                   |           |             |           |
|---------------------------|-----------------------------|----------|----------------------|---------------|------------------------------------------------------------------------------------|------------------------------------------------------------------------------------------------------------------------------|------|-------------------|-----------|-------------|-----------|
| Shailendra Singh(29)      | Till 12 Apr 2020            | Apr 2020 | Retrospective Cohort | United States | Multi-center, 34 health care centers across the US                                 | All confirmed case of COVID-19                                                                                               | 2780 | 52 (18)           | 1070:1710 | -           | -         |
| Alberto Zangrillo(30)     | 20 Feb 2020 - 2 April 2020. | Apr 2020 | Retrospective Cohort | Italy         | Large tertiary hospital in Milan, Italy                                            | Critically ill patients                                                                                                      | 73   | 61* [54–69]       | 61:12     | Admission   | Admission |
| Yongli Yan(31)            | 10 Jan 2020 - 24 Feb 2020   | Apr 2020 | Retrospective cohort | China         | Tongji Hospital, Wuhan                                                             | All patients had “severe” COVID-19                                                                                           | 193  | 64* [49–73]       | 114:79    | -           | -         |
| Kun Wang (32)             | 7 Jan 2020 - 11 Feb 2020    | May 2020 | Retrospective Cohort | China         | First People’s Hospital of Jiangxia district in Wuhan                              | All confirmed case of COVID-19                                                                                               | 296  | 47 (15)           | 140:156   | Admission   | -         |
| Ke Wang(33)               | NA                          | Apr 2020 | Ambispective Cohort  | China         | Unspecified hospital in Wuhan                                                      | All confirmed case of COVID-19                                                                                               | 548  |                   | NA        | Admission   | -         |
| Litao Zhang(34)           | 12 Jan 2020 - 15 Mar 2020   | Apr 2020 | Retrospective Cohort | China         | Wuhan Asia General Hospital, Wuhan                                                 | All confirmed case of COVID-19                                                                                               | 343  | 62* [48-69]       | NA        | Admission   | -         |
| Dawei Wang(35)            | Till 10 Feb 2020            | Apr 2020 | Retrospective Cohort | China         | Zhongnan Hospital of Wuhan University in Wuhan and Xishui Hospital, Hubei Province | All COVID-19 positive patients that were discharged from the two hospitals                                                   | 107  | 51* [36–65]       | 57:50     | Admission   | -         |
| Yanli Liu(36)             | Till 1 Mar 2020             | Apr 2020 | Retrospective Cohort | China         | Central Hospital of Wuhan, Wuhan                                                   | All confirmed case of COVID-19                                                                                               | 383  | 46* [34-61]       | 162:221   | Admission   | -         |
| Yuwei Liu(37)             | 1 Jan 2020 – 29 Feb 2020    | Apr 2020 | Retrospective Cohort | China         | the Zhongnan Hospital of Wuhan University, Wuhan                                   | All confirmed case of COVID-19                                                                                               | 245  | 54 (17)           | 114:131   | Admission   | -         |
| Juyi Li(38)               | 15 Jan 2020 -25 Mar 2020    | Apr 2020 | Retrospective Cohort | China         | Central hospital of Wuhan, Hubei Province                                          | All confirmed case of COVID-19                                                                                               | 1178 | 55.5* [38-67]     | 545:633   | Timeline NA | -         |
| Mohamad Nikpouraghdam(39) | 19 Feb 2020 - 15 Apr 2020   | Apr 2020 | Retrospective Cohort | Iran          | Baqiyatallah Hospital in Tehran                                                    | All confirmed case of COVID-19                                                                                               | 2964 | 56 (15)           | 1.93:1    | -           | -         |
| J. Zhang(40)              | 11 Jan 2020 – 6 Feb 2020    | Apr 2020 | Retrospective Cohort | China         | Renmin Hospital of Wuhan University, Wuhan                                         | All confirmed case of COVID-19                                                                                               | 663  | 56* [44-69]       | 321:342   | Admission   | Admission |
| Vikas Mehta(41)           | 18 Mar 2020 - 8 Apr 2020    | May 2020 | Retrospective Cohort | United States | Montefiore Health system, New York                                                 | All COVID-19 positive patients, and cancer patients (75% of patients had solid tumors and 25% with hematologic malignancies) | 218  | 69* [Range 10-92] | 127:91    | Timeline NA | -         |
| Xiaojing Zou(42)          | 10 Jan 2020 - 10 Feb 2020   | May 2020 | Retrospective Cohort | China         | Tongji Hospital in Wuhan, China                                                    | All confirmed case of COVID-19                                                                                               | 154  | 61 (13)           | 67:87     | Admission   | Admission |

\* = Mean. [..] = IQR. (..) = SD. Timeline NA= Timeline Not available.

**B) Supplementary Table S2: Study characteristics for the studies that compared patients with severe disease with those with non-severe disease**

| Name of the Author | Study duration            | Month and year of publication | Study design         | Country of study | Study setting, City/Province                                              | Number of participants | Age Mean (SD) / Mean*[IQR] | Male: Female | Time of laboratory assessment | Time of Radiological assessment | Time of Disease severity assessment | Criteria for severe disease |
|--------------------|---------------------------|-------------------------------|----------------------|------------------|---------------------------------------------------------------------------|------------------------|----------------------------|--------------|-------------------------------|---------------------------------|-------------------------------------|-----------------------------|
| Wei-jie Guan(43)   | 11 Dec 2019 - 29 Jan 2020 | Feb 2020                      | Retrospective cohort | China            | 552 hospitals in 30 provinces                                             | 1099                   | 54.1 (16)                  | 637:459      | Admission                     | Admission                       | Admission                           | ATS                         |
| Yu-Huan Xu (44)    | Jan 2020 - Feb 2020       | Feb 2020                      | Retrospective cohort | China            | The Fifth Medical Center of Chinese PLA General Hospital, Beijing         | 50                     | 43.9 (16.8)                | 29:21        | -                             | Admission                       | Admission                           | CNHC                        |
| Sijia Tian (45)    | 20 Jan 2020 - 10 Feb 2020 | Feb 2020                      | Retrospective cohort | China            | Beijing Emergency Medical Center, Beijing                                 | 262                    | 47.5* [Range 1-97]         | 127:135      | -                             | -                               | Admission                           | CNHC                        |
| Kunhua Li(46)      | Jan 2020 - Feb 2020       | Feb 2020                      | Retrospective cohort | China            | The second affiliated Hospital of Chongqing Medical university, Chongqing | 83                     | 45.5(12.3)                 | 44:39        | Timeline NA                   | Timeline NA                     | Admission                           | CNHC                        |
| Wei Zhao(47)       | NA                        | Feb 2020                      | Retrospective cohort | China            | four institutions in Hunan province                                       | 101                    | 44.4 (12.3)                | 56:45        | Timeline NA                   | Admission                       | Admission                           | CNHC                        |
| Huan Han(48)       | 31 Jan 2020 - 10 Feb 2020 | Feb 2020                      | Prospective cohort   | China            | Renmin Hospital of Wuhan University, Wuhan                                | 94                     | NA                         | 48:46        | Timeline NA                   | -                               | Timeline NA                         | CNHC                        |
| Guo-Qing Qian(49)  | 20 Jan 2020 - 11 Feb 2020 | Mar 2020                      | Retrospective cohort | China            | Ningbo City First Hospital & many, Zhejiang                               | 91                     | 50* [36.5-57]              | 37:54        | Admission                     | Admission                       | Timeline NA                         | CNHC                        |
| Rong Qu(50)        | Jan 2020 - Feb 2020       | Mar 2020                      | Retrospective cohort | China            | Huizhou municipal central hospital, Huizhou                               | 30                     | 50.5* [36-65]              | 16:14        | Admission                     | -                               | Timeline NA                         | CNHC                        |
| Yong Gao (51)      | 23 Jan 2020 - 2 Feb 2020  | Feb 2020                      | Retrospective cohort | China            | Fuyang Second People's Hospital, Fuyang                                   | 43                     | 45.2(7.68)                 | 9:6          | Timeline NA                   | -                               | Timeline NA                         | CNHC                        |
| Kai-Cai Liu (52)   | 21 Jan 2020 - 3 Feb 2020  | Feb 2020                      | Retrospective cohort | China            | Hefei Second People's Hospital, Hufei                                     | 73                     | 41.6 (14.5)                | 41:32        | Timeline NA                   | Timeline NA                     | Timeline NA                         | CNHC                        |
| Suxin Wan (53)     | 23 Jan 2020 - 8 Feb 2020  | Mar 2020                      | Retrospective cohort | China            | Chongqing University Three Gorges Hospital, Chongqing                     | 135                    | 47* [36-55]                | 72:63        | Admission                     | -                               | Timeline NA                         | CNHC                        |
| Yu Shi(54)         | Up to 17 Feb 2020         | Mar 2020                      | Retrospective cohort | China            | The First Affiliated Hospital, Wenzhou                                    | 487                    | 46(19)                     | 259:228      | Admission                     | Admission                       | Admission                           | CNHC                        |

|                   |                            |          |                      |       |                                                                                                              |     |                   |         |             |             |             |      |
|-------------------|----------------------------|----------|----------------------|-------|--------------------------------------------------------------------------------------------------------------|-----|-------------------|---------|-------------|-------------|-------------|------|
| Kunwei Li (55)    | 18 Jan 2020 - 7 Feb 2020   | Mar 2020 | Retrospective cohort | China | The Fifth Affiliated Hospital of Sun Yat-sen University, Guangzhou                                           | 78  | 44.6(17.9)        | 38:40   | Admission   | Admission   | Admission   | CNHC |
| Chuan Qin (56)    | 10 Jan 2020 - 12 Feb 2020  | Feb 2020 | Retrospective cohort | China | Tongji Hospital, Wuhan                                                                                       | 452 | 58* [47-67]       | 235:217 | Admission   | -           | Admission   | CNHC |
| Lu Huang (57)     | 1 Jan 2020 - 3 Feb 2020    | N/A      | Retrospective cohort | China | Tongji Hospital, Wuhan                                                                                       | 126 | 52(15)            | 67:59   | -           | Admission   | Admission   | CNHC |
| Jin-Jin Zhang(58) | 16 Jan 2020 - Feb 2020     | Feb 2020 | Retrospective cohort | China | No. 7 Hospital of Wuhan, Wuhan                                                                               | 140 | 57* [Range 25-87] | 71:69   | Admission   | Admission   | Admission   | CNHC |
| Gemin Zhang (59)  | 16 Jan 2020 - 25 Feb 2020  | Mar 2020 | Retrospective cohort | China | Wuhan Xinzhou District People's Hospital, Wuhan                                                              | 95  | 49* [Range 39-58] | 53:42   | Admission   | Admission   | Admission   | CNHC |
| Guang Chen(60)    | Dec 2019- 27 Jan 2020      | Mar 2020 | Retrospective cohort | China | Tongji hospital, Wuhan                                                                                       | 21  | 56* [50-65]       | 17:4    | Admission   | Admission   | Admission   | CNHC |
| Jiaojiao Chu(61)  | 7 Jan 2020 - 11 Feb 2020   | Mar 2020 | Retrospective cohort | China | Tongji hospital, Wuhan                                                                                       | 54  | 39* [Range 26-73] | 36:18   | Admission   | Admission   | Admission   | CNHC |
| Yang-kai Li(6)    | 1 Jan 2020 - 3 Mar 2020    | Mar 2020 | Retrospective cohort | China | Tongji Hospital affiliated to Tongji Medical College of Huazhong University of Science and Technology, Wuhan | 25  | 61* [51-59]       | 12:13   | Timeline NA | Timeline NA | Timeline NA | CNHC |
| Jing Yuan(62)     | 11 Jan 2020 - 4 Feb 2020   | Mar 2020 | Retrospective cohort | China | Shenzhen Third People's Hospital, Shenzhen                                                                   | 94  | 40* [Range 1-78]  | 42:52   | Admission   | -           | Timeline NA | CNHC |
| Luwen Wang(63)    | 14 Jan 2020 - 13 Feb 2020  | Mar 2020 | Prospective cohort   | China | Renmin Hospital of Wuhan University, Wuhan                                                                   | 116 | 54* [38-69]       | 67:49   | Timeline NA | -           | Timeline NA | CNHC |
| Huan Han(64)      | 1 Jan 2020 – 18 Feb 2020   | Mar 2020 | Retrospective cohort | China | Renmin Hospital of Wuhan University, Wuhan                                                                   | 273 | 58.8(12.1)        | 97:176  | Admission   | -           | Admission   | CNHC |
| Hangsheng Xie(65) | 2 Feb 2020 - 23 Feb 2020   | Mar 2020 | Retrospective Cohort | China | Jinyintan Hospital, Wuhan                                                                                    | 79  | 60* [Range 27-87] | 44:35   | Admission   | Admission   | Admission   | CNHC |
| Qingzian Cai(66)  | 11 Jan 2020 – 6 March 2020 | Mar 2020 | Retrospective Cohort | China | Third People's Hospital of Shenzhen, Shenzhen                                                                | 298 | 47.5* [33-61]     | 145:153 | Admission   | Admission   | Admission   | CNHC |
| Yafei Zhang(67)   | 18 Jan 2020 – 22 Feb 2020  | Apr 2020 | Retrospective Cohort | China | Zhongnan Hospital of Wuhan University, Wuhan                                                                 | 115 | 49.52 (17.06)     | 49:66   | Admission   | -           | Admission   | CNHC |
| Wang Ling(68)     | 23 Jan 2020 – 29 Feb 2020  | Mar 2020 | Retrospective Cohort | China | Qiandongnan People's Hospital, Kaili City, Qiandongna Miao and Dong Autonomous Prefecture, Guizhou           | 27  | 33 (13)           | 13:14   | Admission   | Admission   | Admission   | CNHC |
| Xinyi Chen(69)    | 26 Jan 2020 – 31 Jan 2020  | Apr 2020 | Retrospective Cohort | China | Chongqing Three Gorges Central Hospital, Chongqing                                                           | 78  | 45* [Range 15-79] | 39:39   | Timeline NA | Timeline NA | Admission   | CNHC |
| Fang Zheng(70)    | 17 Jan 2020 – 7 Feb 2020   | Mar 2020 | Retrospective Cohort | China | Changsha First Hospital, Changsha                                                                            | 161 | 45* [33.5-57]     | 80:81   | Admission   | Admission   | Admission   | CNHC |
| Qing Deng(71)     | 6 Jan 2020 – 20 Feb 2020   | Mar 2020 | Retrospective Cohort | China | Renmin Hospital of Wuhan University, Wuhan                                                                   | 112 | 65* [49-70.7]     | 57:55   | Admission   | -           | Admission   | CNHC |



|                     |                               |          |                      |       |                                                                               |     |                     |         |           |           |             |      |
|---------------------|-------------------------------|----------|----------------------|-------|-------------------------------------------------------------------------------|-----|---------------------|---------|-----------|-----------|-------------|------|
| Huan Li (72)        | 18 Jan 2020 - 26 Feb 2020     | Apr 2020 | Retrospective Cohort | China | Tianyou hospital, Wuhan                                                       | 132 | 64 (13)             | 75:57   | Admission | Admission | Admission   | CNHC |
| Ying Zou(73)        | 20 Jan 2020 - 24 Feb 2020     | Apr 2020 | Retrospective Cohort | China | Shanghai public health clinical center, Shanghai                              | 303 | 51* [Range 16-88]   | 158:145 | Admission | -         | Admission   | CNHC |
| Juyi Li(38)         | 15 Jan 2020 - 15 Mar 2020     | Apr 2020 | Retrospective cohort | China | Central Hospital of Wuhan, Wuhan                                              | 362 | 66* [59-73]         | 189:173 | Admission | -         | Timeline NA | CNHC |
| Fengjuan Shi(74)    | Up to 4 Feb 2020              | Apr 2020 | Retrospective cohort | China | Multicenter,Jiangsu Province of China                                         | 114 | 43.5* [Range 6-79]  | 59:55   | Admission | -         | Admission   | CNHC |
| Guyi Wang(75)       | 17 Jan 2020 – 20 Feb 2020     | N/A      | Retrospective cohort | China | The Public Health Treatment Center of Changsha, Changsha                      | 209 | 54* [Range 35-68]   | 105:104 | Admission | Admission | Admission   | CNHC |
| Ji Mengyao (76)     | 2 Jan 2020 – 28 Jan 2020      | May 2020 | Retrospective cohort | China | Wuhan University Renmin Hospital, Wuhan                                       | 101 | 51* [37-61]         | 48:53   | Admission | Admission | Admission   | CNHC |
| Liang Shen(77)      | Jan 2020 - Feb 2020           | May 2020 | Retrospective cohort | China | Xiangyang Central Hospital, Xiangyang City, Hubei Province                    | 119 | 49* [38-61]         | 56:63   | Admission | -         | Timeline NA | CNHC |
| Fan Yang(78)        | 1 Jan 2020 - 15 Apr 2020      | May 2020 | Retrospective cohort | China | Renmin Hospital of Wuhan University, Wuhan                                    | 52  | 63* [Range 34-98]   | 28:24   | Admission | Admission | Admission   | CNHC |
| Jia Ma(79)          | 1 Jan 2020 – 30 Mar 2020      | Apr 2020 | Retrospective cohort | China | Hubei Cancer Hospital, Tongji Medical College, Wuhan                          | 34  | 62* [59-70]         | 20:17   | Admission | -         | Timeline NA | CNHC |
| Qingqing Chen(80)   | 1 Jan 2020 – 11 Mar 2020      | Apr 2020 | Retrospective cohort | China | Taizhou Public Health Medical Center, Zhejiang                                | 145 | 47.5 (14.6)         | 79:66   | Admission | Admission | Admission   | CNHC |
| Marta Colaneri (81) | 21 Feb 2020 - 28 Feb 2020     | Apr 2020 | Retrospective cohort | Italy | Pavia                                                                         | 44  | 47.5* [Range 10-94] | 28:16   | Admission | Admission | Admission   | ATS  |
| Xin-Ying Zhao(82)   | 16 Jan 2020 - 10 Feb 2020     | Apr 2020 | Retrospective cohort | China | Jingzhou central hospital, Jingzhou                                           | 90  | 46*                 | 49:42   | Admission | -         | Timeline NA | CNHC |
| Lian Chen(83)       | 8 Dec 2019 - 20 Mar 2020      | Apr 2020 | Retrospective cohort | China | National Health Commission of China                                           | 118 | 31* [28-34]         | 0:118   | Admission | Admission | Timeline NA | CNHC |
| Lijun Sun(84)       | 20 Jan 2020 - 15 Feb 2020     | May 2020 | Retrospective cohort | China | Beijing 302 hospital, Beijing                                                 | 55  | 44* [34-56]         | 31:24   | Admission | Admission | Admission   | CNHC |
| Zhe Zhu(85)         | 23 Jan 2020 - 20 Feb 2020     | Apr 2020 | Retrospective cohort | China | Hwa Mei Hospital, University of Chinese Academy of Sciences, Ningbo           | 127 | 50.90 (15.26)       | 45:82   | Admission | -         | Timeline NA | CNHC |
| Ming Ding(16)       | 1 Jan 2020 – 20 Mar 2020      | Apr 2020 | Retrospective cohort | China | Huangshi Traditional Chinese Medicine Hospital, Huangshi City, Hubei Province | 32  | NA                  | NA      | Admission | -         | Admission   | CNHC |
| Yang Liu(86)        | Jan 2020 - Feb 2020           | Apr 2020 | Retrospective cohort | China | First Affiliated Hospital of Nanchang University, Nanchang                    | 76  | 45* [Range 18-78]   | 49:27   | Admission | -         | Admission   | CNHC |
| Yun Feng(87)        | 1 Jan 2020 – 15 Feb 2020      | Apr 2020 | Retrospective cohort | China | Three Hospitals from Wuhan, Shanghai, Anhui province                          | 476 | 53* [40-64]         | 271:205 | Admission | Admission | Timeline NA | CNHC |
| Rui Zhang(88)       | 10 January 2020 - 10 Feb 2020 | Apr 2020 | Retrospective cohort | China | Renmin Hospital of Wuhan University, Wuhan                                    | 120 | 45.4 (15.6)         | 43:77   | Admission | Admission | Admission   | CNHC |
| Xiaohua Chen(89)    | 1 Feb 2020 – 19 Feb 2020      | Apr 2020 | Retrospective cohort | China | General Hospital of Central Theater Command, PLA, Beijing                     | 48  | 64.6 (18.1)         | 37:11   | Admission | -         | Timeline NA | CNHC |

|                     |                           |          |                      |       |                                                                                                      |      |                   |            |             |             |             |          |
|---------------------|---------------------------|----------|----------------------|-------|------------------------------------------------------------------------------------------------------|------|-------------------|------------|-------------|-------------|-------------|----------|
| Xiuqi Wei(90)       | 13 Feb 2020 – 3 Mar 2020  | Apr 2020 | Retrospective cohort | China | Union Hospital of Tongji Medical College, Wuhan, Hubei Province                                      | 252  | 64.8 (13.3)       | 130 :122   | Timeline NA | -           | Timeline NA | ATS      |
| Zheng Yi(91)        | 16 Jan 2020 – 4 Feb 2020  | Apr 2020 | Retrospective cohort | China | Taihe Hospital, Shiyan                                                                               | 73   | 43 [Range 21-76]  | 40: 33     | Admission   | -           | Timeline NA | CNHC     |
| Ruirui Wang(92)     | 20 Jan 2020 - 9 Feb 2020  | Apr 2020 | Retrospective cohort | China | NO.2 People’s Hospital of Fuyang City, Fuyang city                                                   | 125  | 38.8 (13.8)       | 71: 54     | Admission   | Admission   | Timeline NA | CNHC     |
| Zhixian Yao(93)     | 1 Jan 2020 – 6 Feb 2020   | May 2020 | Retrospective cohort | China | Jinyintan Hospital, Wuhan                                                                            | 463  | 51* [43-60]       | 244: 219   | -           | -           | Timeline NA | CNHC     |
| Fang Lei(94)        | 20 Dec 2019 - 8 Mar 2020  | May 2020 | Retrospective cohort | China | Multcenter, Wuhan                                                                                    | 5771 | 56* [43-65]       | 2724: 3047 | Admission   | Admission   | Admission   | CNHC     |
| Lu Lu(95)           | 18 Jan 2020 – 18 Feb 2020 | Apr 2020 | Retrospective cohort | China | Multicenter study - 42 officially designed hospitals in Hubei province                               | 304  | 44* [33,59.25]    | 182:122    | Timeline NA | -           | Timeline NA | CNHC     |
| Yang Yang(96)       | NA                        | Apr 2020 | Retrospective cohort | China | Shenzhen Third People’s Hospital, Shenzhen                                                           | 50   | 62*[Range 22-78]  | 29:21      | Admission   | -           | Timeline NA | CNHC     |
| Xiaojie Bi(97)      | 23 Jan 2020 – 4 Feb 2020  | Apr 2020 | Retrospective cohort | China | Taizhou Hospital, Zhejiang Province                                                                  | 91   | 44* (36–54)       | 51:40      | Admission   | Admission   | Timeline NA | CNHC     |
| Fang Liu(98)        | 18 Jan 2020 – 12 Mar 2020 | Apr 2020 | Retrospective cohort | China | General Hospital of Central Theater Command of People’s Liberation Army, Wuhan                       | 140  | 65.5* (54.3-73)   | 49:91      | Admission   | Admission   | Timeline NA | CNHC     |
| Guangchang Pei (99) | Up to 9 Feb 2020          | Apr 2020 | Retrospective cohort | China | Tongji Medical College, Huazhong University of Science and Technology, Wuhan                         | 333  | 56.3 (13.4)       | 182:151    | Admission   | Timeline NA | Admission   | CNHC     |
| Qingchun Yao(21)    | 30 Jan 2020 – 11 Feb 2020 | Apr 2020 | Retrospective cohort | China | Dabieshan Medical Center, Huanggang city, Hubei Province                                             | 108  | 52 (37 – 58)      | 43:65      | Admission   | Admission   | Timeline NA | ATS      |
| Ling Hu(100)        | 8 Jan 2020 – 20 Feb 2020  | May 2020 | Retrospective cohort | China | Tianyou Hospital, an affiliate of the Wuhan University of Science and Technology, Wuhan              | 323  | 61* [Range 29-91] | 166:157    | Admission   | Admission   | Admission   | CNHC     |
| Xiaofan Liu(101)    | 5 Feb 2020 - 14 Mar 2020  | Apr 2020 | Retrospective cohort | China | Renmin Hospital of Wuhan University, Wuhan                                                           | 99   | NA                | NA         | Timeline NA | -           | Timeline NA | CNHC     |
| Zhang J (40)        | 11 Jan 2020 – 6 Feb 2020  | Apr 2020 | Retrospective cohort | China | Renmin Hospital of Wuhan University, Wuhan                                                           | 663  | 55.6* [44-69]     | 321:342    | Admission   | Admission   | Admission   | CNHC     |
| Yuan-Yuan Wei(102)  | N/A                       | Apr 2020 | Retrospective cohort | China | Multicenter, Anhui Province                                                                          | 167  | 42.31 (15.29)     | 95 :72     | Timeline NA | -           | Timeline NA | CNHC     |
| Xiaochen Li(103)    | 26 Jan 2020 - 5 Feb 2020  | Apr 2020 | Retrospective cohort | China | Sino-French New City Branch of Tongji Hospital, Huazhong University of Science and Technology, Wuhan | 548  | 60* [48-69]       | 279:269    | Admission   | Admission   | Admission   | ATS/CNHC |
| Yufen Zheng(104)    | 17 Jan 2020 - 26 Feb 2020 | Apr 2020 | Retrospective cohort | China | Taizhou Public Health Medical Center, Taizhou Hospital, Taizhou, Zhejiang Province                   | 141  | 47* [38-56]       | 74:67      | Admission   | -           | Admission   | CNHC     |
| Feng Wang (105)     | Up to Jan 2020            | May 2020 | Retrospective cohort | China | Tongji Hospital, Wuhan                                                                               | 65   | 57.1 (13.01)      | 37:28      | Timeline NA | -           | Timeline NA | CNHC     |

|                  |                           |          |                      |       |                                                                                  |     |                   |         |           |             |             |      |
|------------------|---------------------------|----------|----------------------|-------|----------------------------------------------------------------------------------|-----|-------------------|---------|-----------|-------------|-------------|------|
| Peijie Lyu (106) | 15 Jan 2019 - 24 Feb 2020 | Apr 2020 | Retrospective cohort | China | The First Affiliated Hospital of Zhengzhou University, Zhengzhou, Henan Province | 51  | 54 (17)           | 29:22   | -         | Timeline NA | Timeline NA | CNHC |
| Rui Liu(107)     | 31 Jan 2020 – 26 Feb 2020 | Mar 2020 | Retrospective cohort | China | Renmin Hospital, Wuhan                                                           | 119 | 63.3 (11.7)       | 62:57   | Admission | -           | Admission   | CNHC |
| H Hou(108)       | 24 Jan 2020 – 15 Feb 2020 | Apr 2020 | Retrospective cohort | China | Tongji Hospital, Wuhan.                                                          | 389 | 61.3 (13.8)       | 200:189 | Admission | -           | Admission   | CNHC |
| Shufa Zheng(109) | 19 Jan 2020 - 20 Mar 2020 | Apr 2020 | Retrospective cohort | China | First Affiliated Hospital, College of Medicine, Zhejiang University, Hangzhou    | 96  | 55* [44.3 – 64.8] | 58:38   | -         | Admission   | Admission   | CNHC |

ATS= American thoracic society guidelines(110). CNHC= Chinese National Health Commission guidelines(111).

PLA=People's Liberation Army. Timeline NA= Timeline Not available.

\* = Mean. [ ] = IQR. ( ) = SD.

## Section III

### Quality assessment

**Supplementary Table S3: Quality assessment for studies that compared patients who died with those who survived.**

| Name of the Author  | New Castle-Ottawa Quality assessment Scale<br>(Total score=9) |                              |                           |                                                  |               |                       |                       |                       |
|---------------------|---------------------------------------------------------------|------------------------------|---------------------------|--------------------------------------------------|---------------|-----------------------|-----------------------|-----------------------|
|                     | Representativeness of exposed                                 | Selection of the non-exposed | Ascertainment of exposure | Outcome of interest was not present at the start | Comparability | Assessment of outcome | Long enough follow up | Adequacy of follow up |
| Xiaobo Yang(1)      | *                                                             | *                            | *                         | *                                                | *             | *                     | *                     | *                     |
| Tao Chen(2)         | *                                                             | *                            | *                         | *                                                | *             | *                     | *                     | *                     |
| Ning Tang(3)        | *                                                             | *                            | *                         | *                                                | *             | *                     | *                     | *                     |
| Qiurong Ruan(4)     | *                                                             | *                            | *                         | *                                                | *             | *                     | *                     | *                     |
| Chaomin Wu(5)       | *                                                             | *                            | *                         | *                                                | *             | *                     | *                     | *                     |
| Yang-kai Li(6)      | *                                                             |                              |                           | *                                                |               | *                     | *                     | *                     |
| Yan Deng(7)         | *                                                             | *                            | *                         | *                                                | *             | *                     | *                     | *                     |
| Mingli Yuan(8)      | *                                                             | *                            | *                         | *                                                | *             | *                     | *                     |                       |
| Fei Zhou(9)         | *                                                             | *                            | *                         | *                                                | *             | *                     | *                     |                       |
| Jianlei Cao(10)     | *                                                             | *                            | *                         | *                                                | *             | *                     | *                     | *                     |
| Rong-Hui Du(11)     | *                                                             | *                            | *                         | *                                                | *             | *                     | *                     |                       |
| Wen-Jun Tu(12)      | *                                                             | *                            | *                         | *                                                | *             | *                     | *                     | *                     |
| Lang Wang(13)       | *                                                             | *                            | *                         | *                                                | *             | *                     | *                     | *                     |
| Yang Wang(14)       | *                                                             | *                            | *                         | *                                                | *             | *                     | *                     | *                     |
| Mengyuan Dai(15)    | *                                                             | *                            | *                         | *                                                | **            | *                     | *                     | *                     |
| Ming Ding(16)       |                                                               |                              | *                         | *                                                | *             | *                     | *                     | *                     |
| Helena Barrasaa(17) | *                                                             |                              | *                         | *                                                | *             | *                     | *                     | *                     |

|                           |   |   |   |   |   |   |   |   |
|---------------------------|---|---|---|---|---|---|---|---|
| TieLong Chen(18)          | * | * | * | * | * | * | * | * |
| Hernando Trujillo(19)     | * |   | * | * | * | * | * |   |
| Gwilym Webb (20)          | * | * | * | * | * | * | * | * |
| Qingchun Yao(21)          | * |   |   | * | * | * |   |   |
| Jia-Fu Wei(22)            | * | * | * | * | * | * | * | * |
| Jennifer Tomlins(23)      | * | * | * | * | * | * | * | * |
| Xiaobo Yang(24)           | * | * | * | * | * | * | * | * |
| Rongrong Yang (25)        | * | * | * | * | * | * | * | * |
| Safiya Richardson(26)     | * |   | * | * | * | * | * | * |
| Jeremy Gold(27)           | * | * | * | * | * | * | * | * |
| Lei Gao(28)               | * | * | * | * | * | * | * | * |
| Shailendra Singh(29)      | * | * | * | * | * |   |   |   |
| Alberto Zangrillo(30)     | * | * | * | * | * | * | * | * |
| Yongli Yan(31)            | * | * | * | * | * | * | * | * |
| Kun Wang (32)             | * |   | * | * | * | * | * | * |
| Ke Wang(33)               | * |   | * | * | * | * | * | * |
| Litao Zhang(34)           | * |   | * | * | * | * | * | * |
| Dawei Wang(35)            | * | * | * | * | * | * | * | * |
| Yanli Liu(36)             | * | * | * | * | * | * | * | * |
| Yuwei Liu(37)             | * |   | * | * | * | * | * | * |
| Juyi Li(38)               | * | * | * | * | * | * | * | * |
| Mohamad Nikpouraghdam(39) | * |   | * | * | * | * | * | * |
| J. Zhang(40)              | * |   | * |   | * |   |   | * |
| Vikas Mehta(41)           | * | * | * | * | * | * | * | * |
| Xiaojing Zou(42)          | * | * | * | * | * | * | * | * |

**Supplementary Table S4: Quality assessment of studies that compared patients with severe disease with those with non-severe disease**

| Name of the Author | New Castle-Ottawa - Quality assessment Scale<br>(Total score=9) |                              |                           |                                                  |               |                       |                       |                       |
|--------------------|-----------------------------------------------------------------|------------------------------|---------------------------|--------------------------------------------------|---------------|-----------------------|-----------------------|-----------------------|
|                    | Representativeness of exposed                                   | Selection of the non-exposed | Ascertainment of exposure | Outcome of interest was not present at the start | Comparability | Assessment of outcome | Long enough follow up | Adequacy of follow up |
| Wei-jie Guan(43)   | *                                                               | *                            | *                         | *                                                | *             | *                     | *                     | *                     |
| Yu-Huan Xu (44)    | *                                                               | *                            | *                         | *                                                | *             | *                     | *                     | *                     |
| Sijia Tian (45)    | *                                                               | *                            | *                         | *                                                | *             | *                     | *                     | *                     |
| Kunhua Li(46)      | *                                                               |                              | *                         | *                                                | *             | *                     | *                     | *                     |
| Wei Zhao(47)       | *                                                               | *                            | *                         | *                                                | *             | *                     | *                     | *                     |
| Huan Han(48)       |                                                                 |                              | *                         | *                                                | *             | *                     | *                     | *                     |
| Guo-Qing Qian(49)  | *                                                               | *                            | *                         | *                                                | *             | *                     | *                     |                       |
| Rong Qu(50)        | *                                                               | *                            | *                         | *                                                | *             | *                     | *                     |                       |
| Yong Gao (51)      | *                                                               | *                            | *                         | *                                                | *             | *                     | *                     | *                     |
| Kai-Cai Liu (52)   | *                                                               | *                            | *                         | *                                                | *             | *                     | *                     |                       |
| Suxin Wan (53)     | *                                                               | *                            | *                         | *                                                | *             | *                     | *                     |                       |
| Yu Shi(54)         | *                                                               | *                            | *                         | *                                                | *             | *                     | *                     | *                     |
| Kunwei Li (55)     | *                                                               | *                            | *                         | *                                                | *             | *                     | *                     | *                     |
| Chuan Qin (56)     | *                                                               | *                            | *                         | *                                                | *             | *                     | *                     | *                     |
| Lu Huang (57)      | *                                                               | *                            | *                         | *                                                | *             | *                     | *                     |                       |
| Jin-Jin Zhang(58)  | *                                                               | *                            | *                         | *                                                | *             | *                     | *                     | *                     |
| Gemin Zhang (59)   | *                                                               | *                            |                           | *                                                | *             | *                     |                       |                       |
| Guang Chen(60)     | *                                                               | *                            | *                         | *                                                | *             | *                     | *                     | *                     |

|                     |   |   |   |   |   |   |   |   |
|---------------------|---|---|---|---|---|---|---|---|
| Jiaojiao Chu(61)    | * | * | * | * | * | * | * | * |
| Yang-kai Li(6)      | * |   |   | * |   | * | * | * |
| Jing Yuan(62)       | * | * | * | * | * | * | * |   |
| Luwen Wang(63)      | * | * | * | * | * | * | * |   |
| Huan Han(64)        | * | * | * | * | * | * | * | * |
| Hangsheng Xie(65)   | * | * | * |   | * | * | * | * |
| Qingzian Cai(66)    | * | * |   | * | * | * |   |   |
| Yafei Zhang(67)     | * | * | * |   | * |   | * | * |
| Wang Ling(68)       | * | * | * |   | * |   | * | * |
| Xinyi Chen(69)      | * | * | * | * | * | * | * | * |
| Fang Zheng(70)      | * | * | * |   | * | * | * | * |
| Qing Deng(71)       | * | * | * |   | * | * | * | * |
| Huan Li (72)        | * | * | * |   | * | * | * | * |
| Ying Zou(73)        | * | * | * | * | * | * | * | * |
| Juyi Li(38)         | * | * | * | * | * | * | * | * |
| Fengjuan Shi(74)    | * | * | * | * | * | * | * |   |
| Guyi Wang(75)       | * | * | * | * | * | * | * | * |
| Ji Mengyao (76)     | * | * | * | * | * | * | * |   |
| Liang Shen(77)      | * | * | * | * | * | * | * | * |
| Fan Yang(78)        | * | * | * | * | * | * | * | * |
| Jia Ma(79)          | * | * | * | * | * | * | * | * |
| Qingqing Chen(80)   | * | * | * | * | * | * | * | * |
| Marta Colaneri (81) | * | * | * | * | * | * | * | * |
| Xin-Ying Zhao(82)   | * | * | * | * | * | * | * |   |
| Lian Chen(83)       | * | * | * | * | * | * | * | * |
| Lijun Sun(84)       | * | * | * | * | * | * | * |   |
| Zhe Zhu(85)         | * | * | * | * | * | * | * |   |
| Ming Ding(16)       | * | * | * | * | * | * | * |   |
| Yang Liu(86)        | * | * | * | * | * | * | * | * |
| Yun Feng(87)        | * | * | * | * | * | * | * | * |
| Rui Zhang(88)       | * |   |   | * | * |   |   | * |

|                     |   |   |   |   |   |   |   |   |
|---------------------|---|---|---|---|---|---|---|---|
| Xiaohua Chen(89)    | * | * | * | * | * | * | * | * |
| Xiuqi Wei(90)       | * | * | * | * | * | * | * |   |
| Zheng Yi(91)        | * | * | * | * | * | * | * | * |
| Ruirui Wang(92)     | * | * | * | * | * | * | * |   |
| Zhixian Yao(93)     | * | * | * | * | * | * | * | * |
| Fang Lei(94)        | * | * | * | * |   | * | * | * |
| Lu Lu(95)           | * | * | * | * | * | * | * | * |
| Yang Yang(96)       | * | * |   | * | * | * |   |   |
| Xiaojie Bi(97)      | * | * | * | * | * | * | * | * |
| Fang Liu(98)        | * | * | * | * | * | * | * | * |
| Guangchang Pei (99) | * | * | * | * | * | * | * |   |
| Qingchun Yao(21)    | * |   |   | * | * | * |   |   |
| Ling Hu(100)        | * | * | * | * | * | * | * |   |
| Xiaofan Liu(101)    | * | * | * | * | * | * | * |   |
| Zhang J (40)        | * | * | * | * | * | * | * |   |
| Yuan-Yuan Wei(102)  | * | * | * | * | * | * | * | * |
| Xiaochen Li(103)    | * | * | * | * |   | * | * |   |
| Yufen Zheng(104)    | * | * | * | * | * | * | * | * |
| Feng Wang (105)     | * | * | * | * | * | * | * |   |
| Peijie Lyu (106)    | * | * | * | * | * | * | * |   |
| Rui Liu(107)        | * | * | * | * | * | * | * |   |
| H Hou(108)          | * | * | * | * | * | * | * | * |
| Shufa Zheng(109)    | * | * | * | * | * | * | * |   |





## Section IV

**Supplementary Table S5: Subgroup analysis based on whether critically ill patients were included in the study**

| Clinical characteristics               | All studies    |                     |                | Studies with all COVID-19 patients |                     |                | Studies with only critically ill COVID-19 patients |                    |                |
|----------------------------------------|----------------|---------------------|----------------|------------------------------------|---------------------|----------------|----------------------------------------------------|--------------------|----------------|
|                                        | No. of Studies | Pooled RR [95% CI]  | I <sup>2</sup> | No. of Studies                     | Pooled RR [95% CI]  | I <sup>2</sup> | No. of Studies                                     | Pooled RR [95% CI] | I <sup>2</sup> |
| Cardiovascular diseases                | 25             | 2.27 [1.88–2.79]    | 70.78%         | 22                                 | 2.47[2.06–2.95]     | 63.76%         | 3                                                  | 1.27 [0.90–1.80]   | 20.87%         |
| Cerebrovascular Disease                | 15             | 2.63 [1.97–3.51]    | 75.22%         | 14                                 | 2.76[2.02–3.75]     | 73.28%         | 1                                                  | 1.69[1.23–2.32]    | ..             |
| Diarrhea                               | 14             | 1.15 [0.85–1.57]    | 64.65%         | 13                                 | 1.23[0.8–1.70]      | 60.55%         | 1                                                  | 0.76[0.55–1.07]    | ..             |
| Dyspnea                                | 20             | 2.55 [1.88–3.46]    | 77.13%         | 16                                 | 3.17[2.32–4.32]     | 63.89%         | 4                                                  | 1.38 [0.98–1.94]   | 51.88%         |
| Shock                                  | 9              | 6.12 [3.59–10.45]   | 93.35%         | 8                                  | 5.66 [3.15–10.15]   | 93.57%         | 1                                                  | 10.76 [7.15–16.19] | ..             |
| Bacteremia                             | 6              | 5.07 [2.02–12.67]   | 94.28%         | 5                                  | 6.55 [2.60–16.54]   | 93.92%         | 1                                                  | 1.24 [0.54–2.84]   | ..             |
| Acute cardiac injury                   | 14             | 5.42 [3.79–7.77]    | 86.24 %        | 14                                 | 5.82 [4.40–7.71]    | 69.79%         | 2                                                  | 3.37 [0.53–21.47]  | 97.74%         |
| Acute Respiratory Distress Syndrome    | 14             | 20.19 [10.87–37.52] | 79.05%         | 12                                 | 22.76 [13.07–39.66] | 63.32%         | 2                                                  | 8.48 [0.54–133.79] | 96.04%         |
| Acute Kidney Injury                    | 15             | 4.65 [3.25–6.65]    | 94.89%         | 13                                 | 5.07 [3.49–7.37]    | 94.38%         | 2                                                  | 2.70 [0.85–8.59]   | 96.06%         |
| Acute liver injury                     | 10             | 2.54 [1.77–3.66]    | 93.14%         | 8                                  | 2.84 [1.94–4.17]    | 91.17%         | 2                                                  | 1.67 [0.60–4.64]   | 93.37%         |
| Disseminated intravascular coagulation | 4              | 3.41 [2.00–5.81]    | 94.86%         | 3                                  | 3.17 [1.53–6.57]    | 95.98%         | 1                                                  | 4.27 [3.43–5.31]   | ..             |
| Gastrointestinal bleeding              | 4              | 2.53 [1.42–4.49]    | 76.21%         | 3                                  | 3.13 [1.79–5.46]    | 64.09%         | 1                                                  | 1.39 [0.80–2.42]   | ..             |
| TLC > 10 x 10 <sup>9</sup> /L          | 5              | 4.72 [2.69–8.30]    | 86.80%         | 5                                  | 4.72 [2.69–8.30]    | 86.80%         | ..                                                 | ..                 | ..             |
| Na <sup>+</sup> > 145 mmol/L           | 2              | 2.70 [2–3.64]       | 63.06%         | 2                                  | 2.70 [2–3.64]       | 63.06%         | ..                                                 | ..                 | ..             |
| Procalcitonin >0.5 ng/mL               | 6              | 2.44 [1.40–4.26]    | 92.33%         | 5                                  | 3.39 [2.62–4.39]    | 43.43%         | 1                                                  | 0.88 [0.69–1.12]   | ..             |
| BNP > 100 ng/L                         | 2              | 14.65 [0.49–440.36] | 90.98%         | 2                                  | 14.65 [0.49–440.36] | 90.98%         | ..                                                 | ..                 | ..             |

## **Section V**

### **Supplementary figures**

The following symbols in the forest plots denote the primary hospital where the study was conducted

- ! Shenzhen Third People's Hospital, Shenzhen, China
- # Tongji Hospital, Wuhan, China
- \$ Wuhan Jinyintan Hospital, Wuhan, China
- \* Zhongnan Hospital of Wuhan University, Wuhan, China
- % Tianyou Hospital, Wuhan, China
- & Taizhou Public Health Medical Center, Zhejiang, China; Central hospital of Wuhan, Wuhan
- + Chongqing Three Gorges Central Hospital, Chongqing, China
- @ Renmin Hospital of Wuhan University, Wuhan, China
- ^ General Hospital of Central Theater Command of People's Liberation Army, Wuhan, China

**eFigure 1.** Pooled Risk ratio of death in male patients compared to female patients. a) Forest plot b) Funnel Plot

1.a

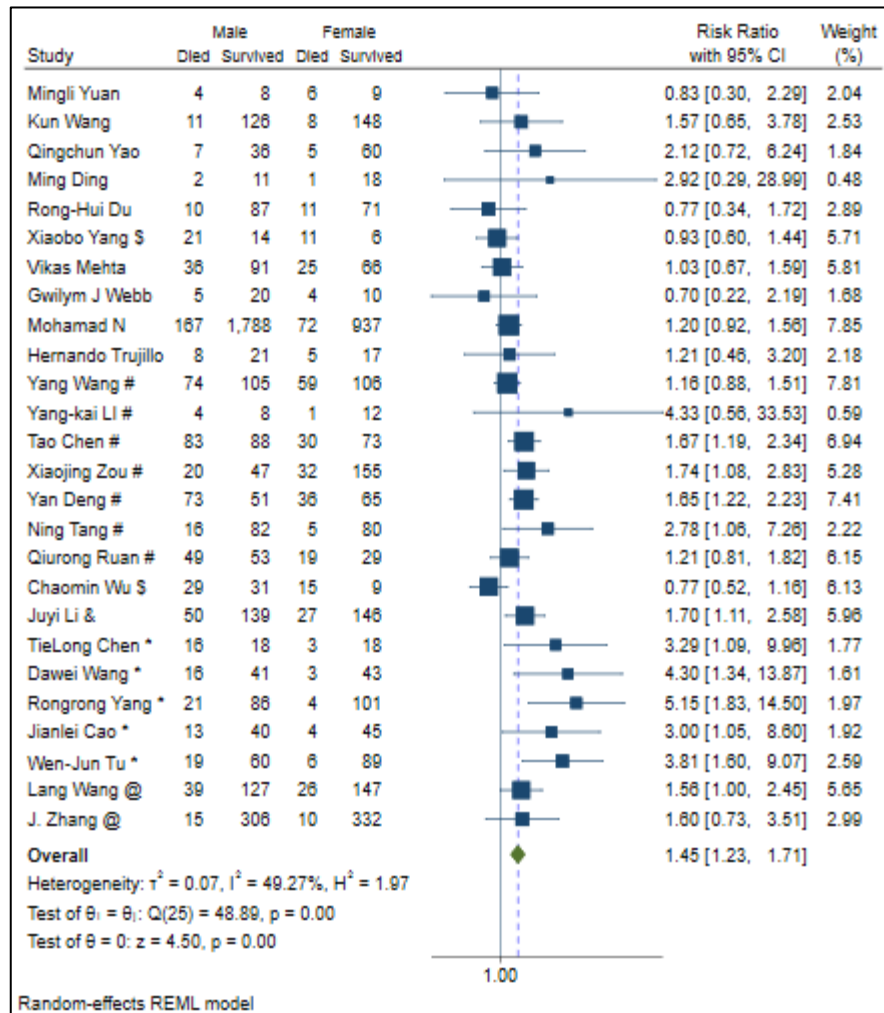

1.b

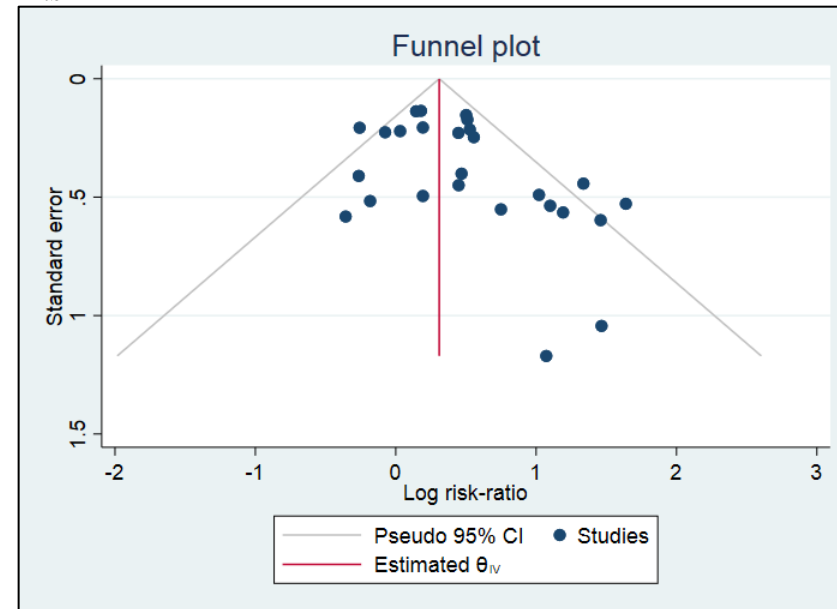

**eFigure 2.** Pooled Risk ratio of death in ever smoker patients. a) Forest plot

2a

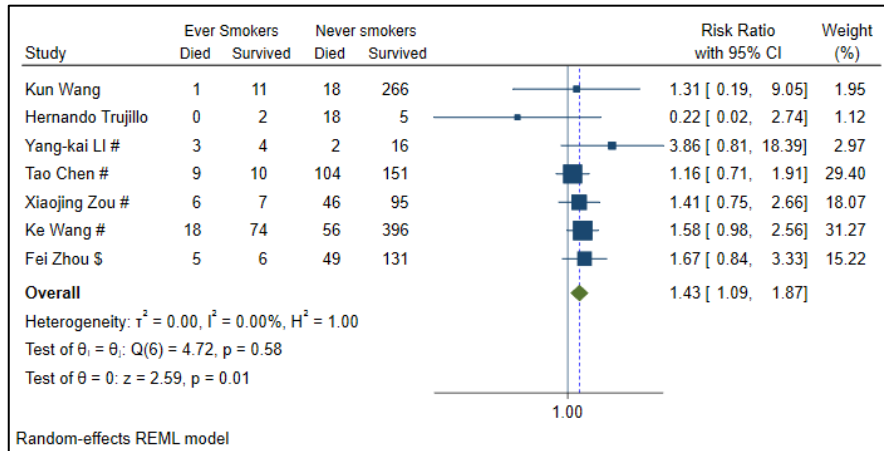

eFigure 3. Pooled Risk ratio of death in patients with Diabetes Mellitus (DM). a) Forest plot b) Funnel Plot

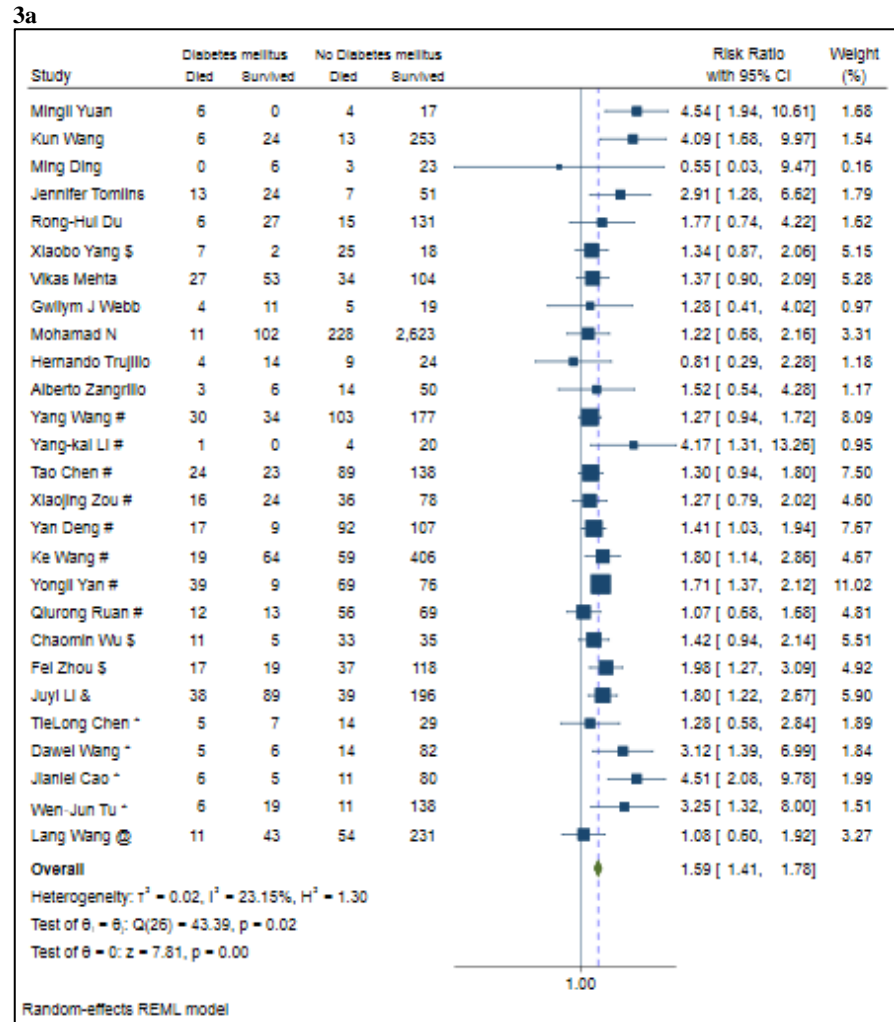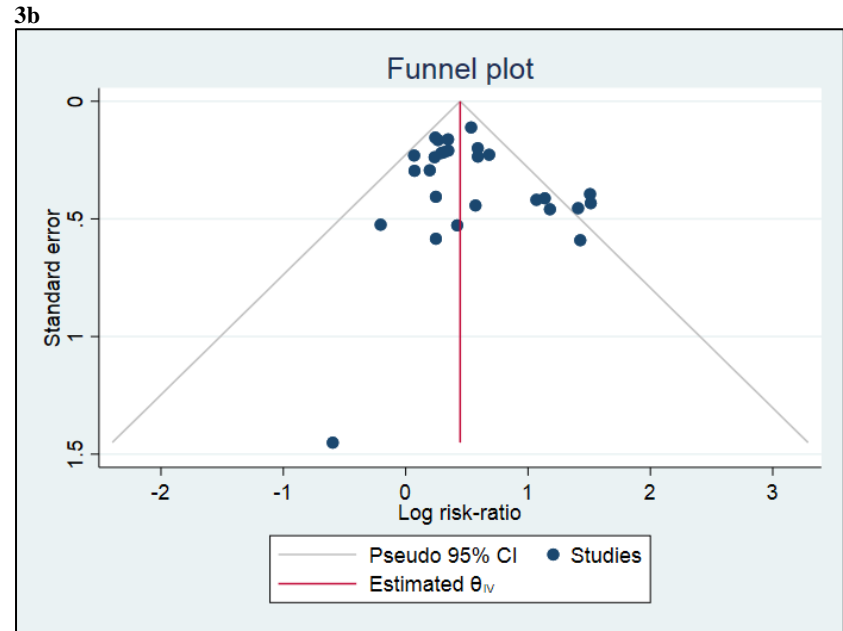

eFigure 4. Pooled Risk ratio of death in patients with Hypertension (HTN). a) Forest plot b) Funnel Plot

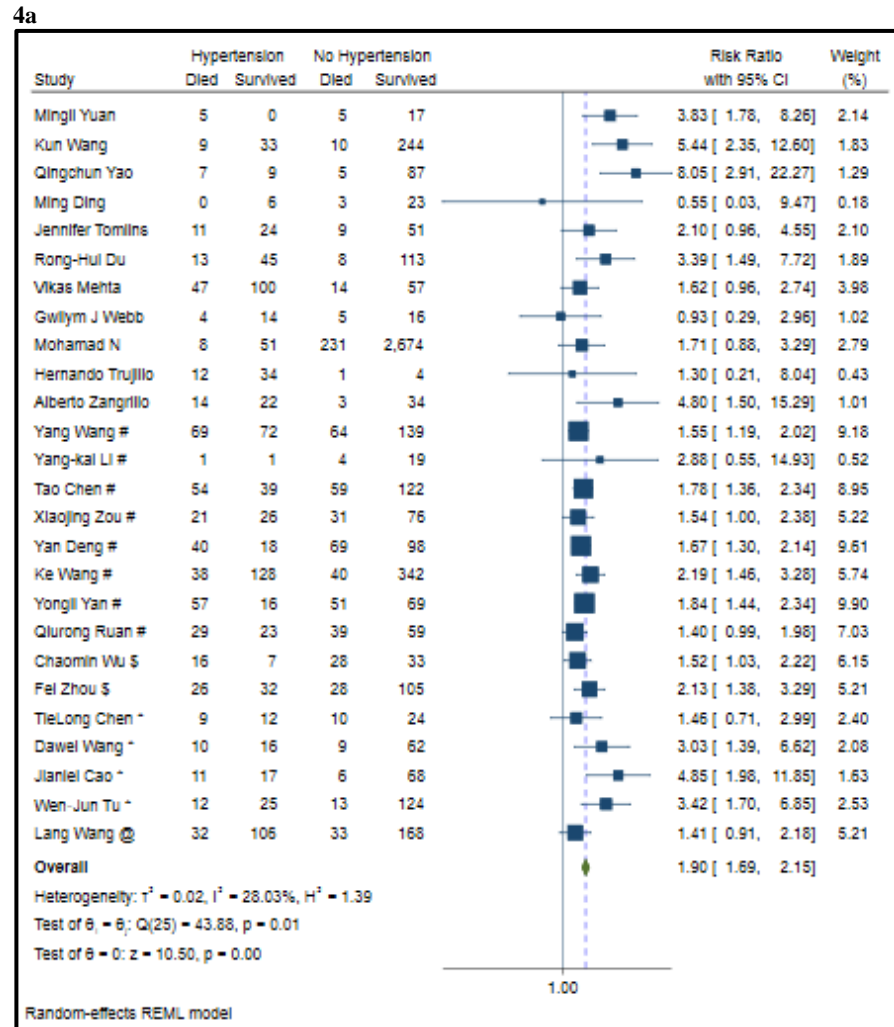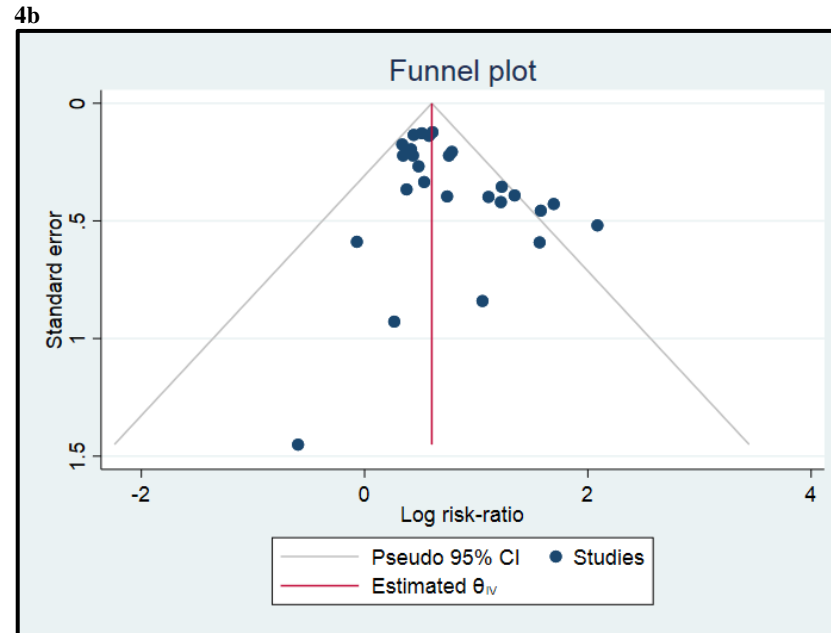

eFigure 5. Pooled Risk ratio of death in patients with Cardiovascular disease a) Forest plot b) Funnel Plot c) Subgroup analysis

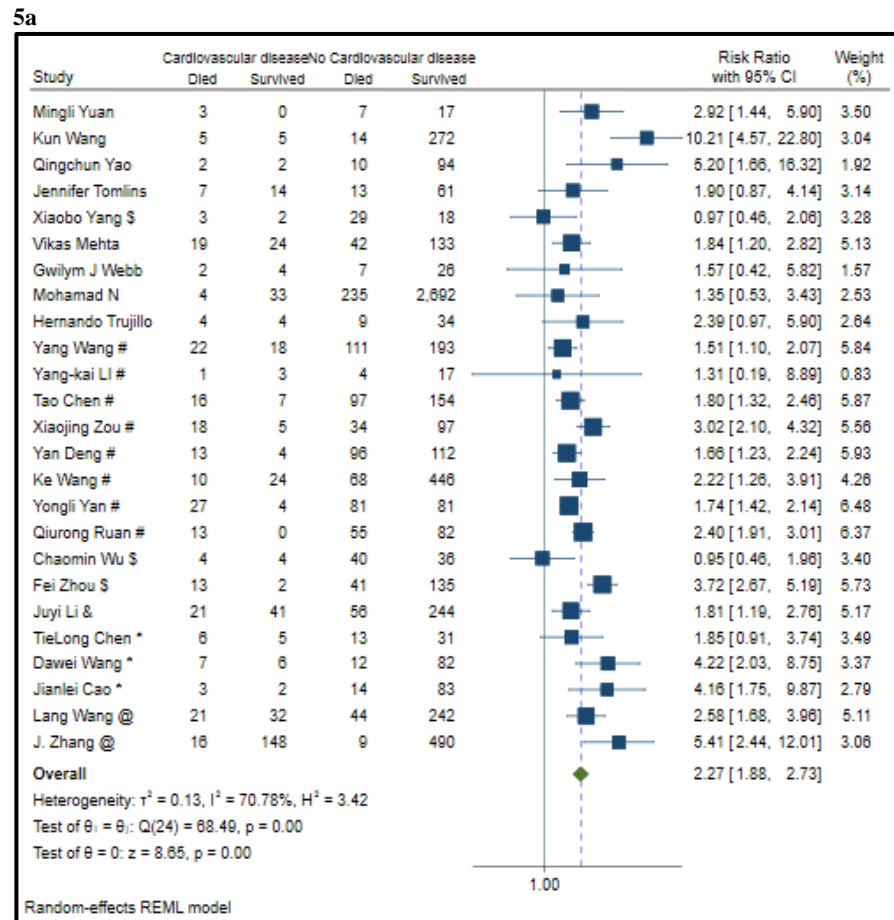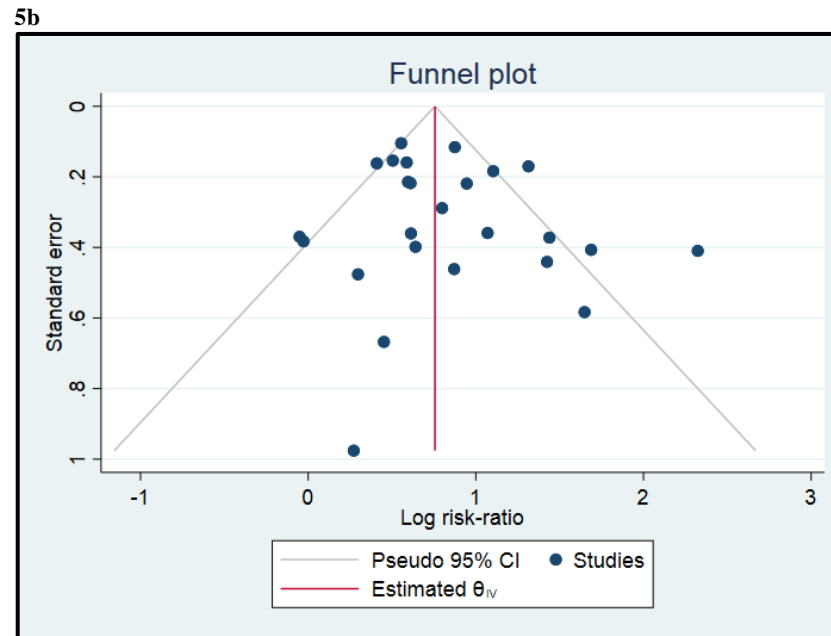



5c

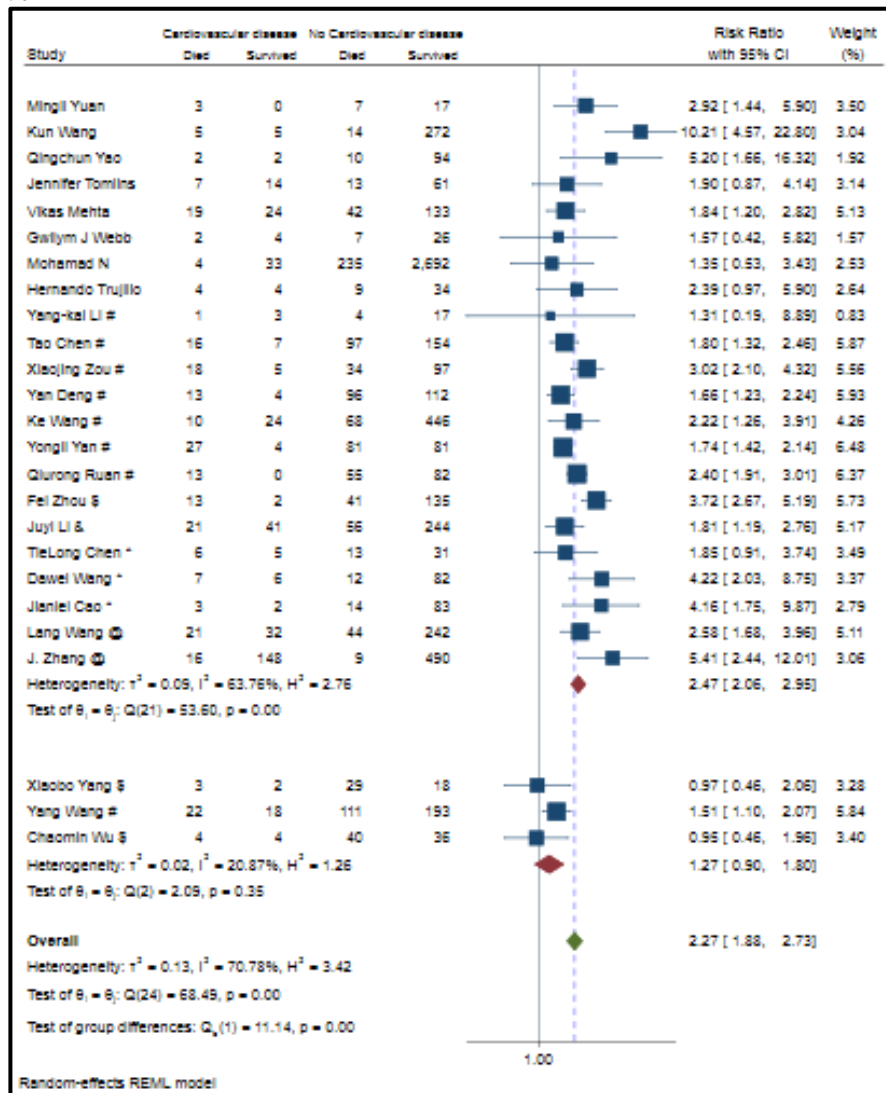

eFigure 6. Pooled Risk ratio of death in patients with Congestive Heart Failure a) Forest plot

6a

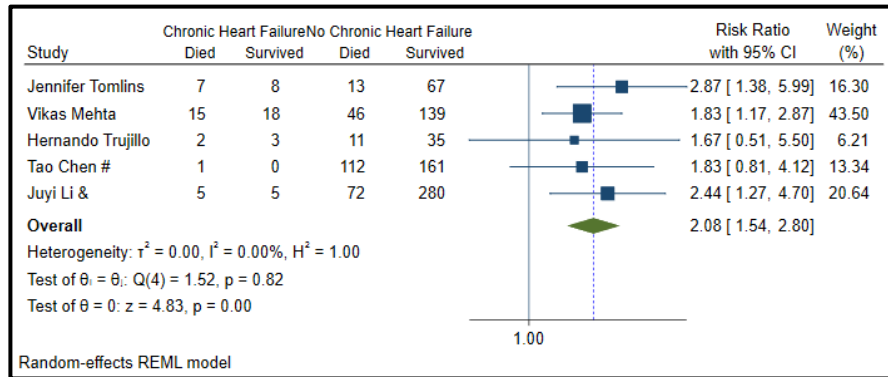

eFigure 7. Pooled Risk ratio of death in patients with Cerebrovascular diseases a) Forest plot b) Funnel Plot c) Subgroup analysis

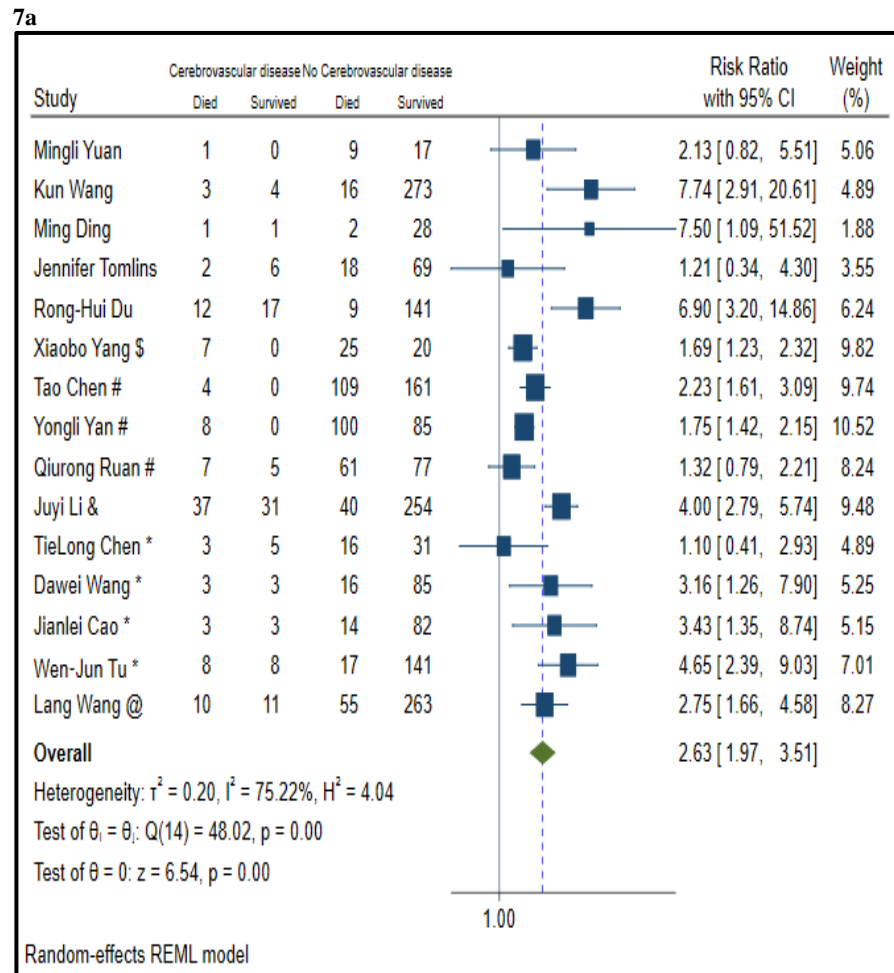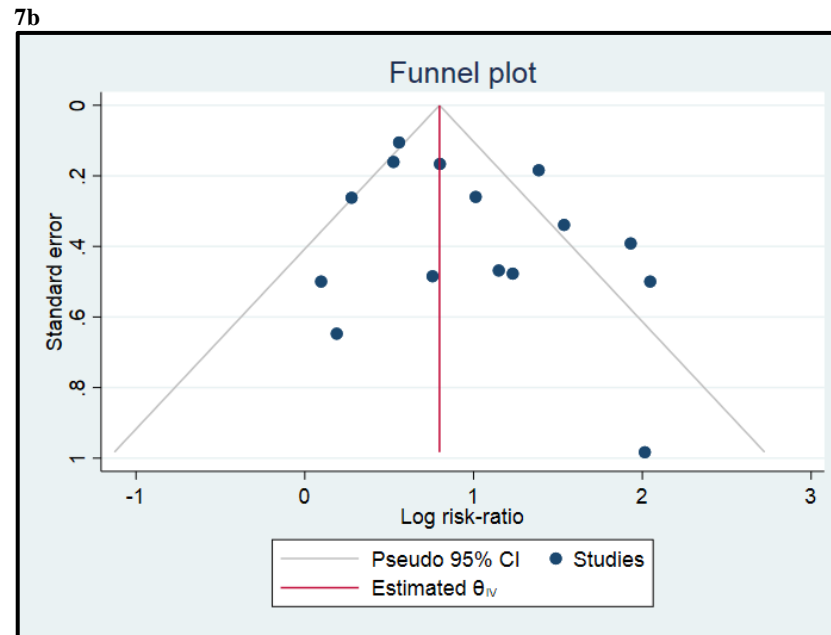

7c

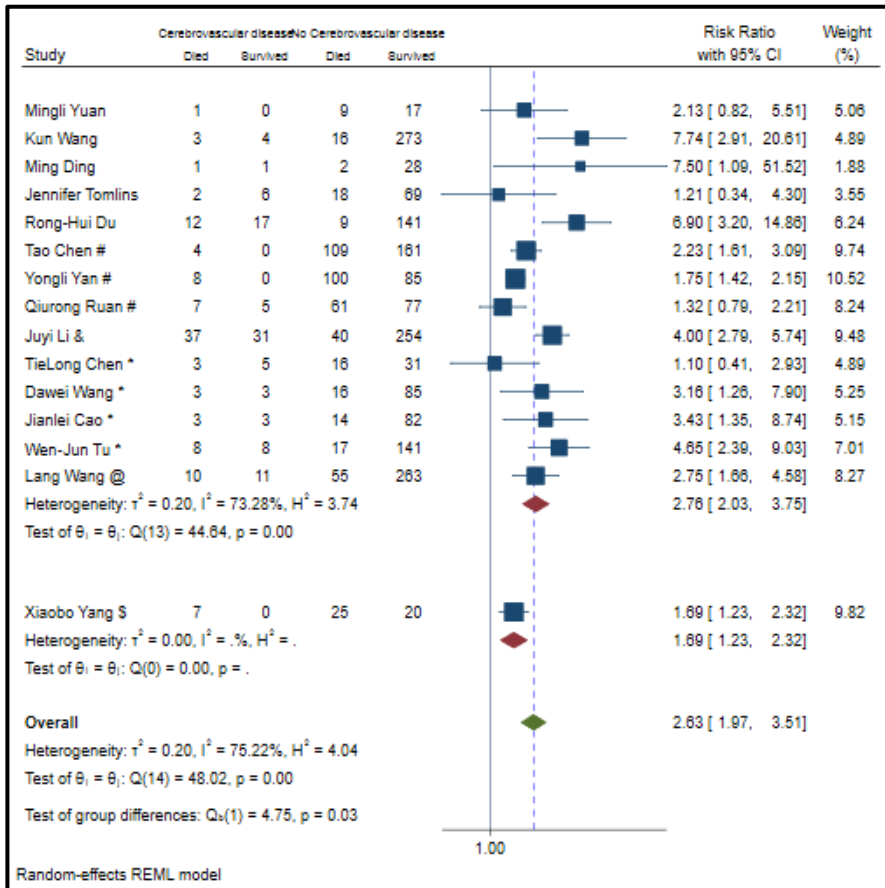

eFigure 8. Pooled Risk ratio of death in patients with COPD a) Forest plot b) Funnel Plot

8a

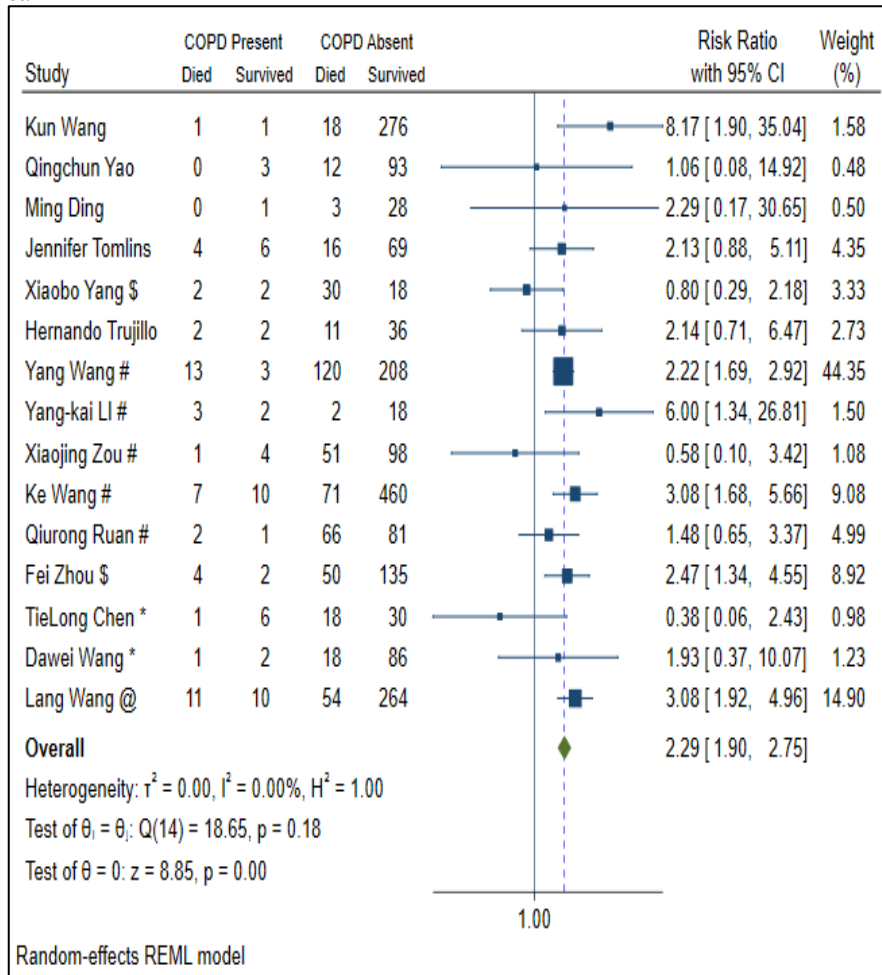

8b

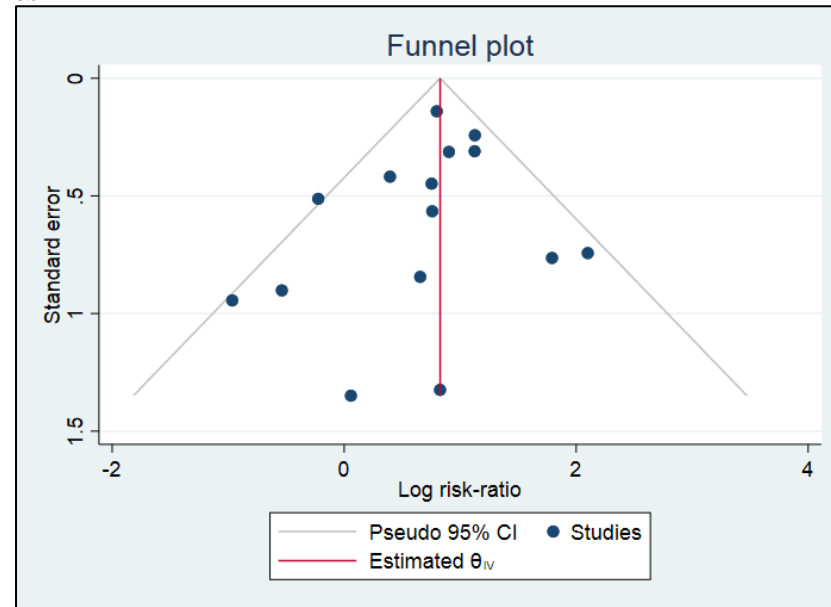

eFigure 9. Pooled Risk ratio of death in patients with Asthma a) Forest plot

9a

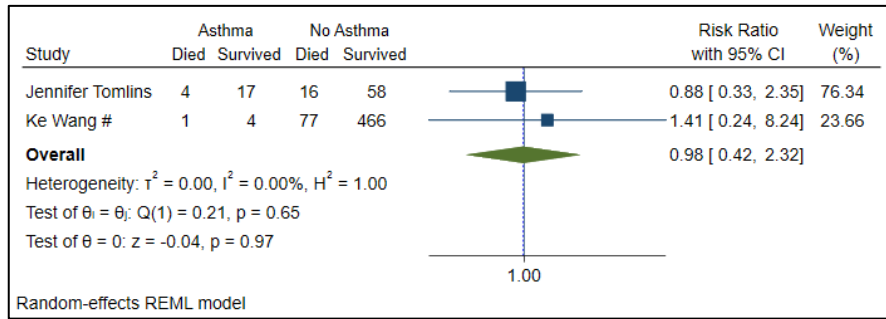

eFigure 10. Pooled Risk ratio of death in patients with Chronic Kidney Disease a) Forest plot b) Funnel Plot

10a

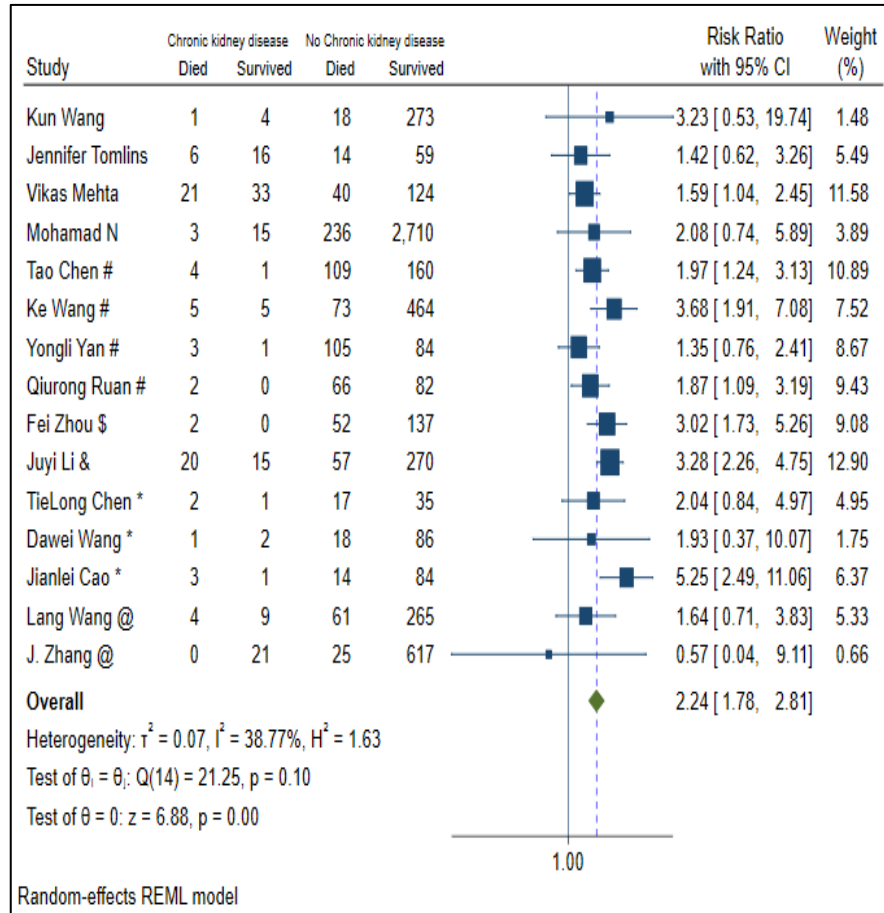

10b

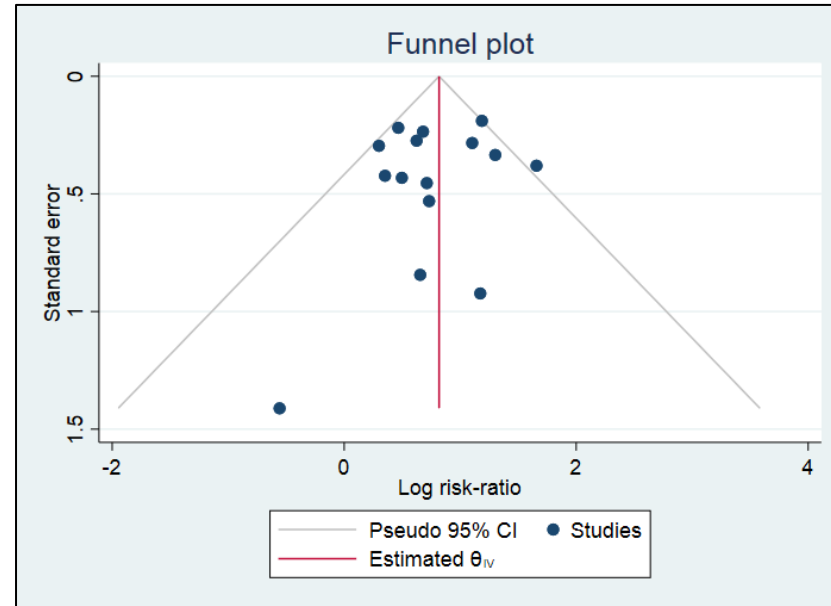

eFigure 11. Pooled Risk ratio of death in patients with Hepatitis B infection a) Forest plot

11a

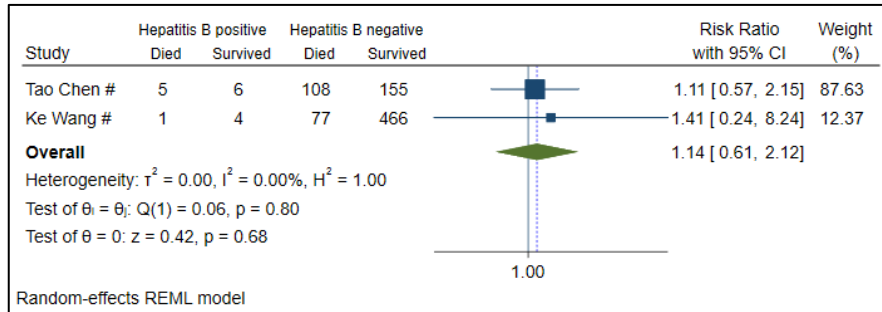



eFigure 12. Pooled Risk ratio of death in patients with HIV infection a) Forest plot

**12a**

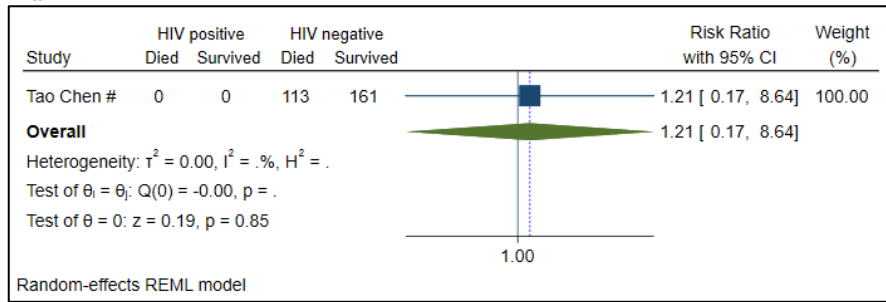

eFigure 13. Pooled Risk ratio of death in patients with Malignancy a) Forest plot b) Funnel Plot

13a

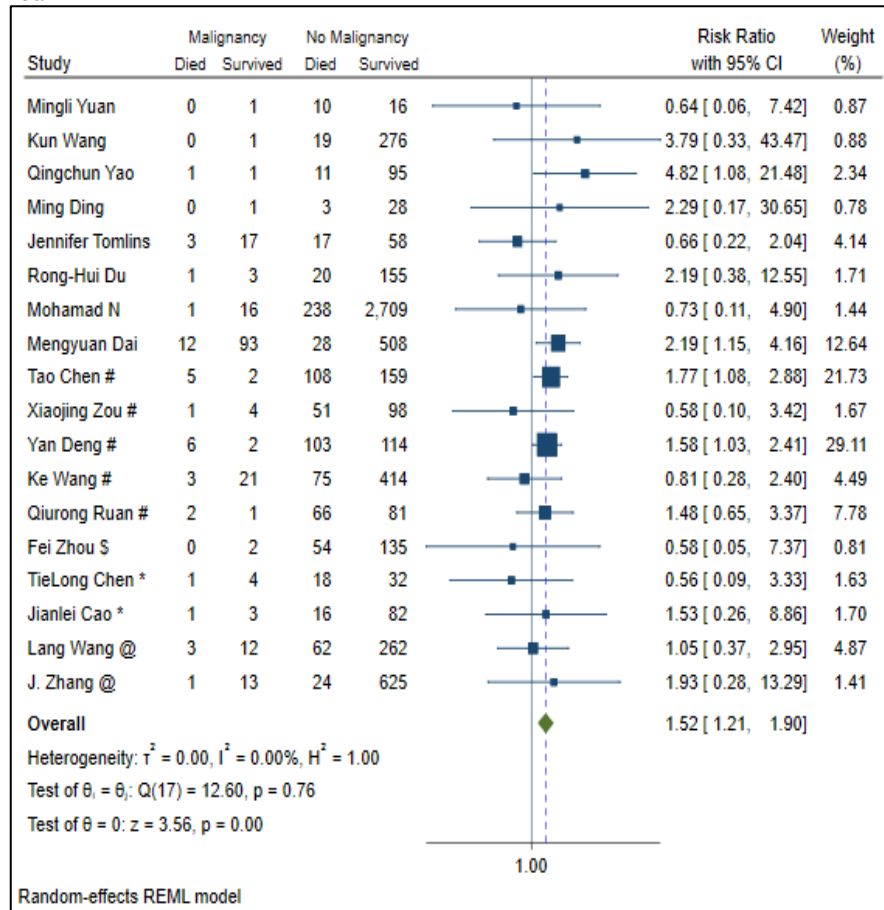

13b

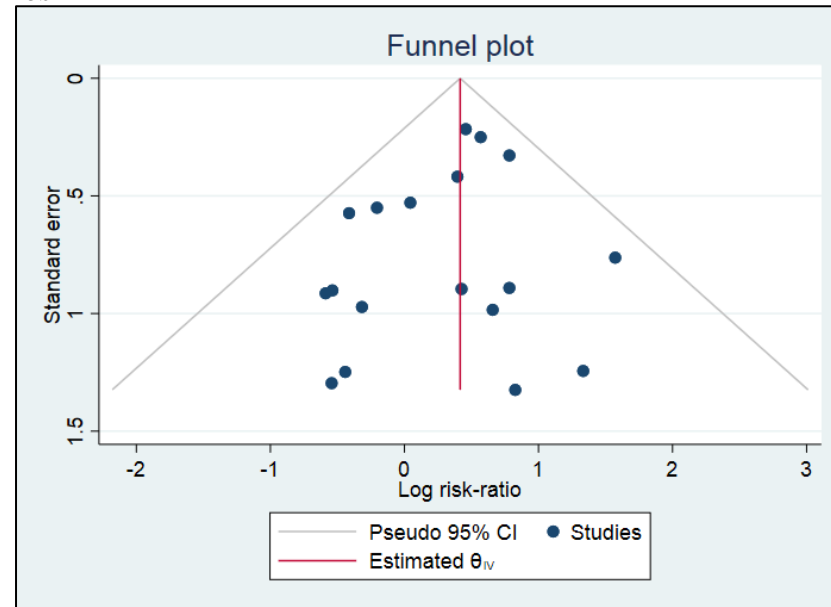

eFigure 14. Pooled Risk ratio of death in patients with fever a) Forest plot b) Funnel Plot

14a

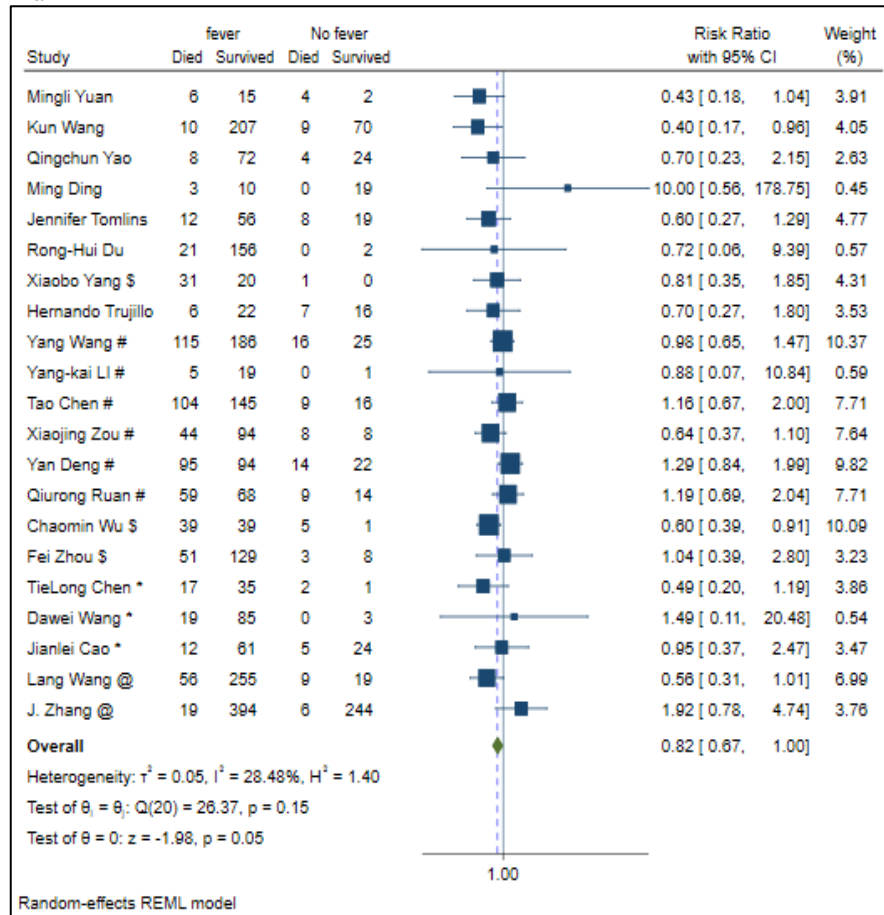

14b

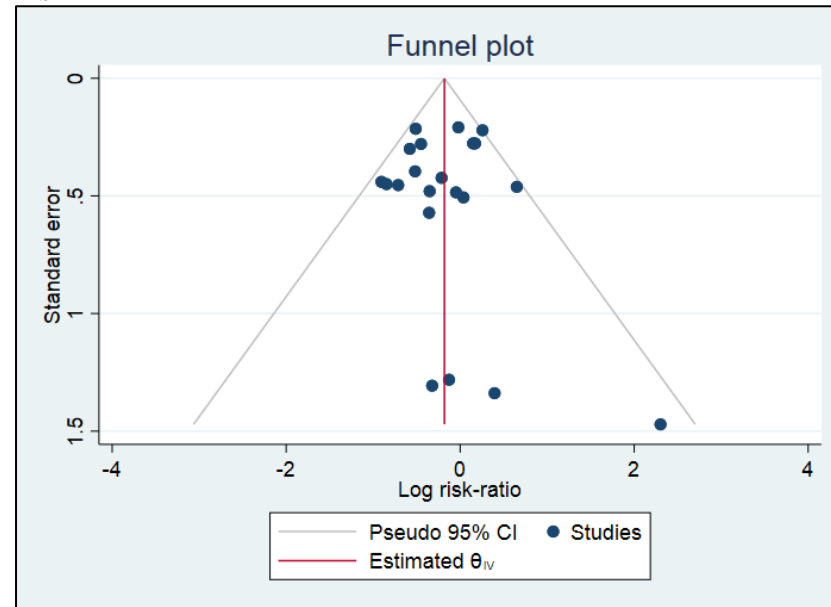

eFigure 15. Pooled Risk ratio of death in patients with sore throat a) Forest plot

**15a**

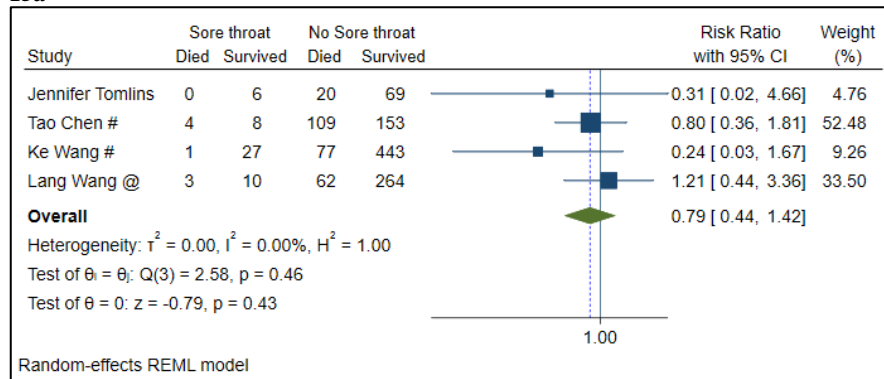

eFigure 16. Pooled Risk ratio of death in patients with cough a) Forest plot b) Funnel Plot

16a

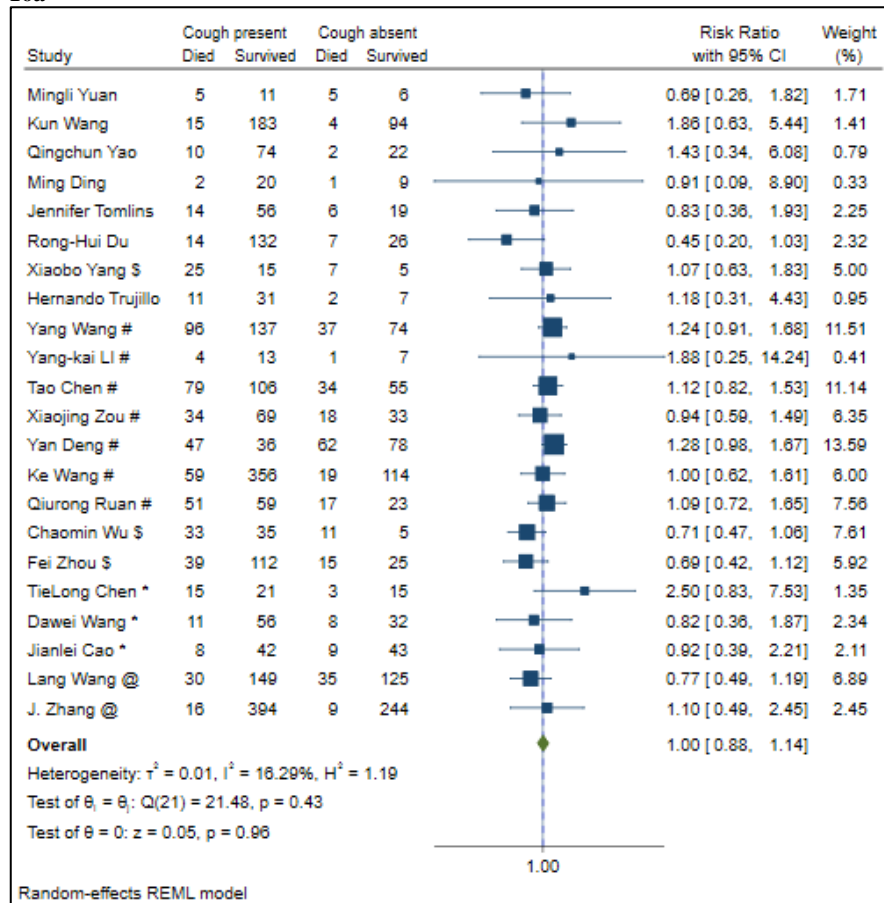

16b

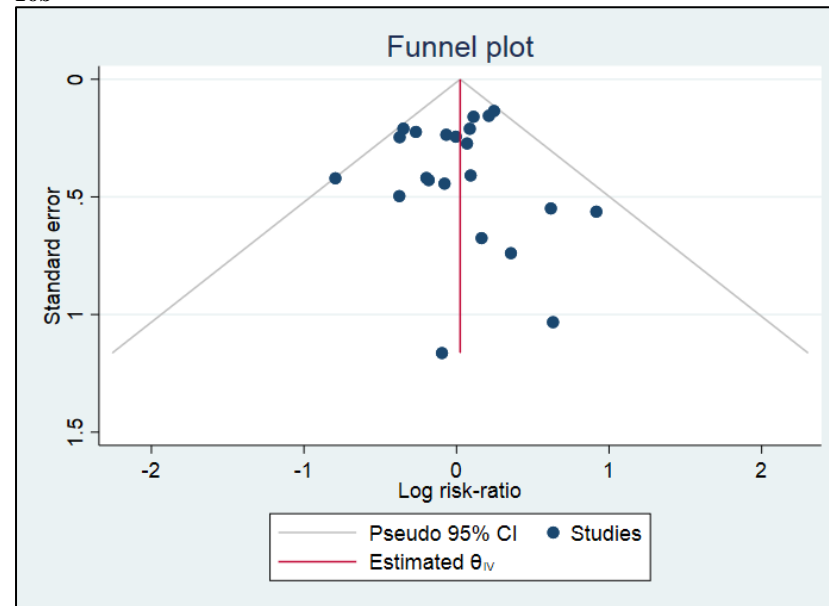

eFigure 17. Pooled Risk ratio of death in patients with expectation a) Forest plot

17a

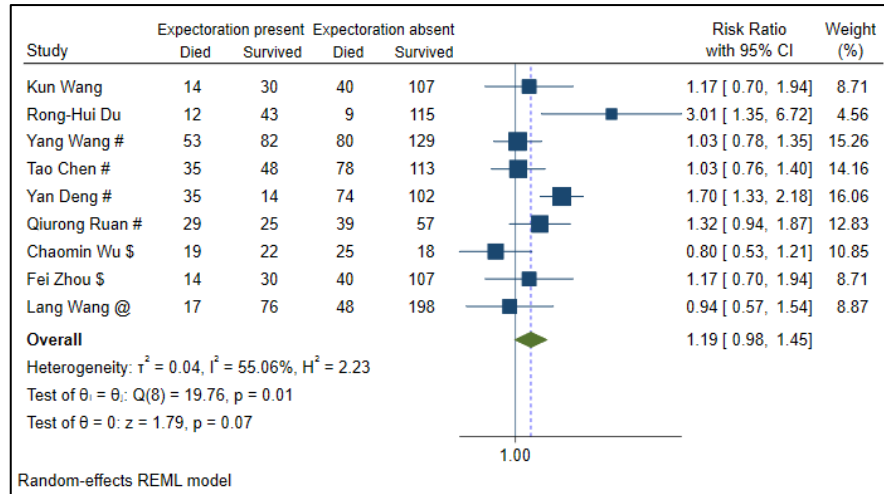

eFigure 18. Pooled Risk ratio of death in patients with vomiting a) Forest plot

18a

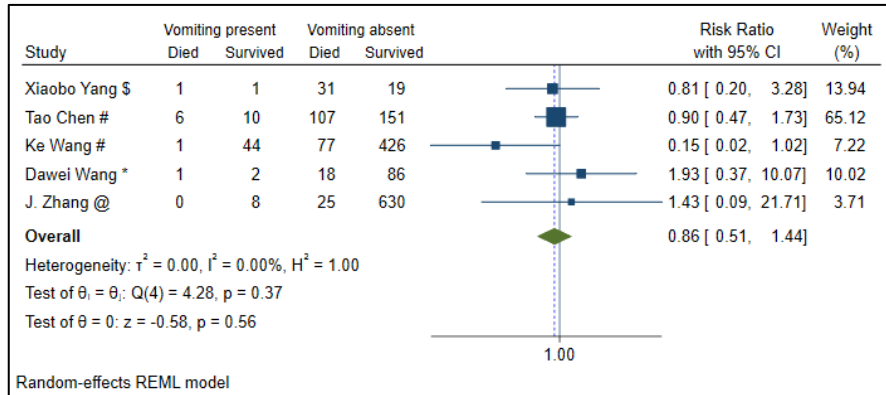

eFigure 19. Pooled Risk ratio of death in patients with Diarrhea a) Forest plot b) Funnel Plot c) Subgroup analysis

19a

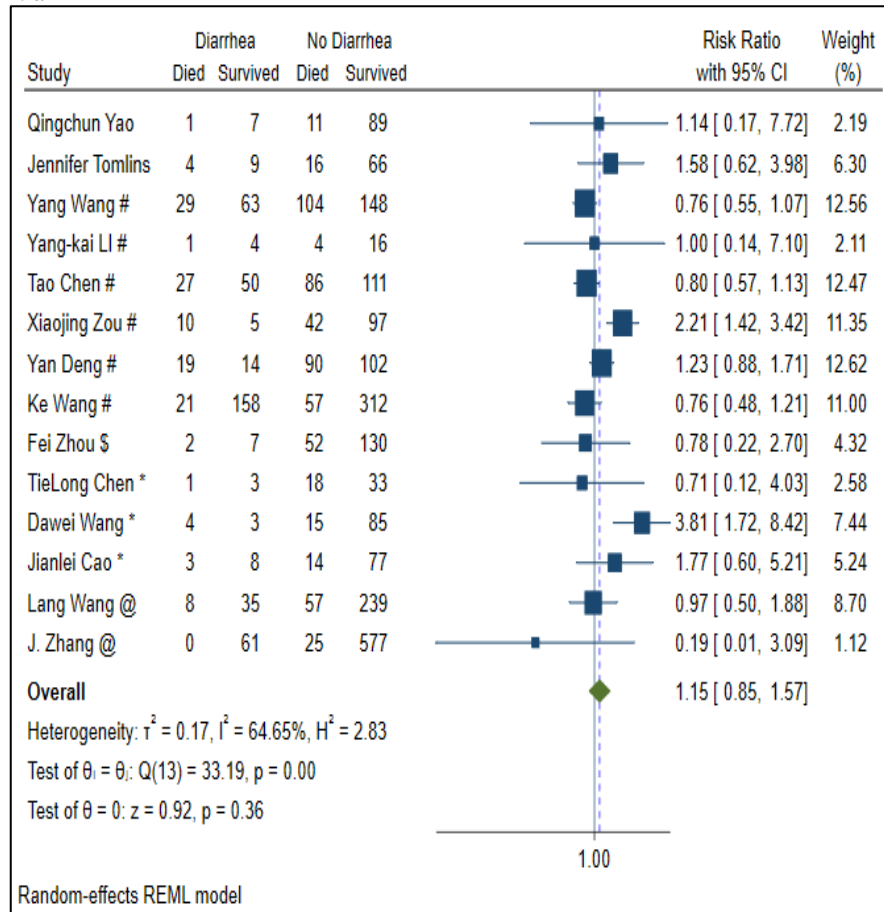

19b

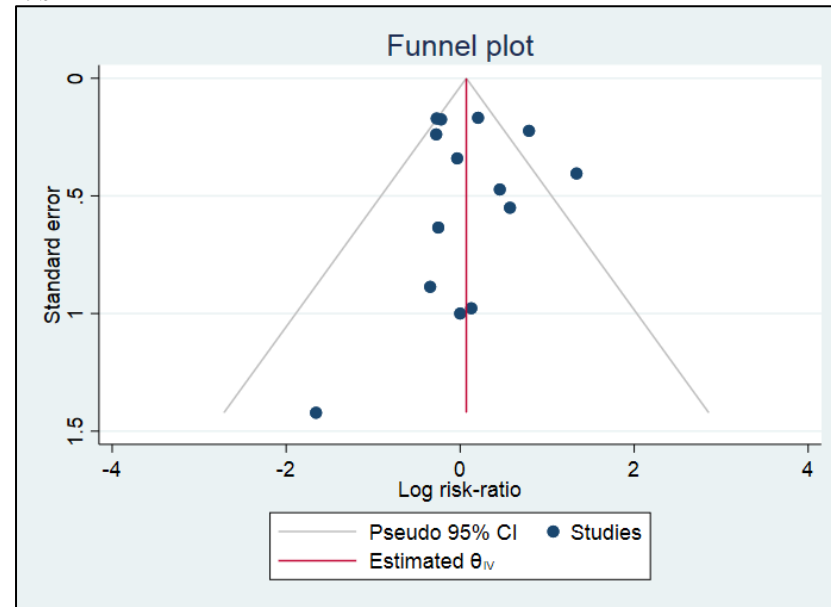



19c

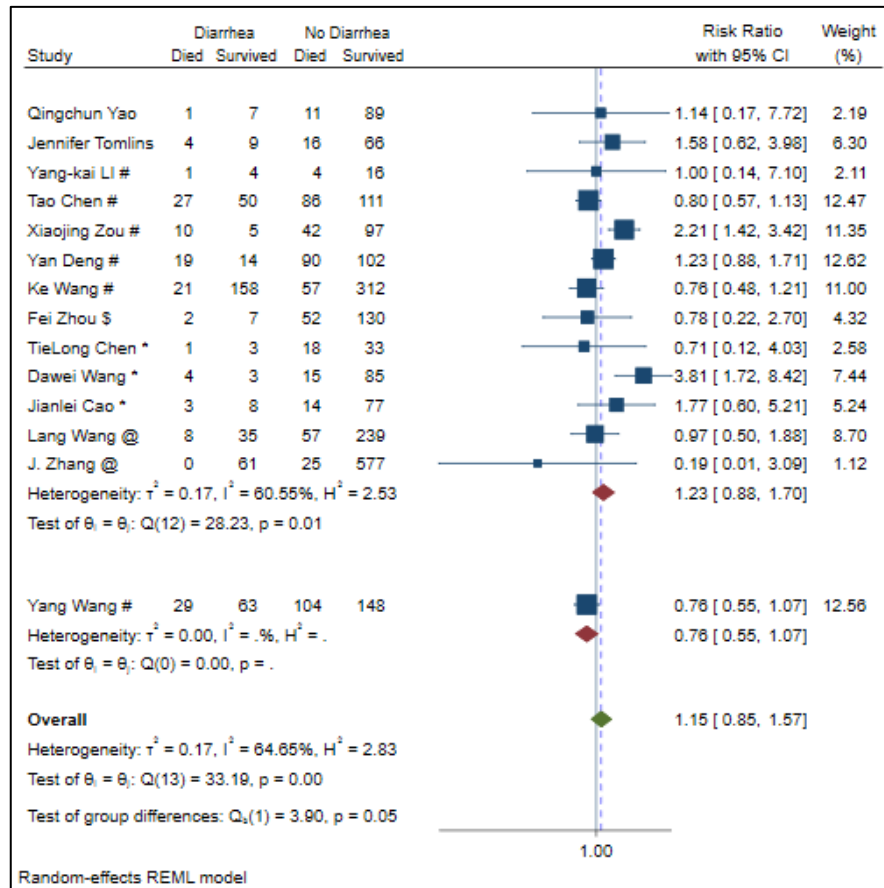

eFigure 20. Pooled Risk ratio of death in patients with nausea a) Forest plot

20a

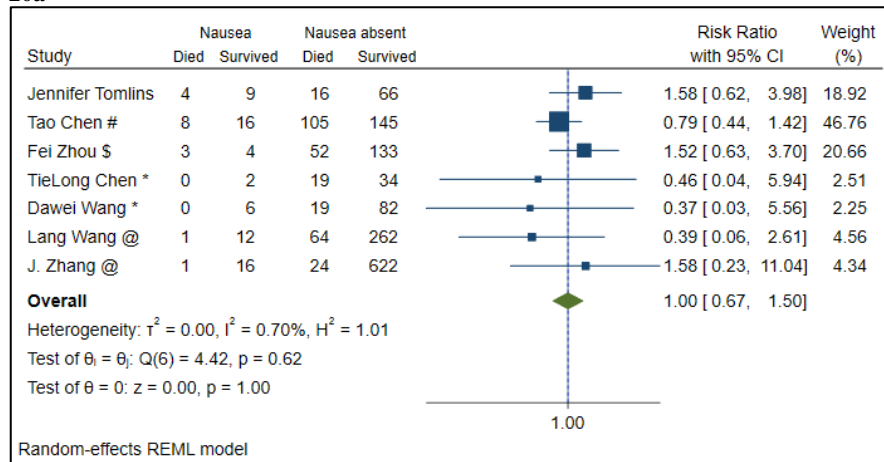

eFigure 21. Pooled Risk ratio of death in patients with Myalgia a) Forest plot b) Funnel Plot

21a

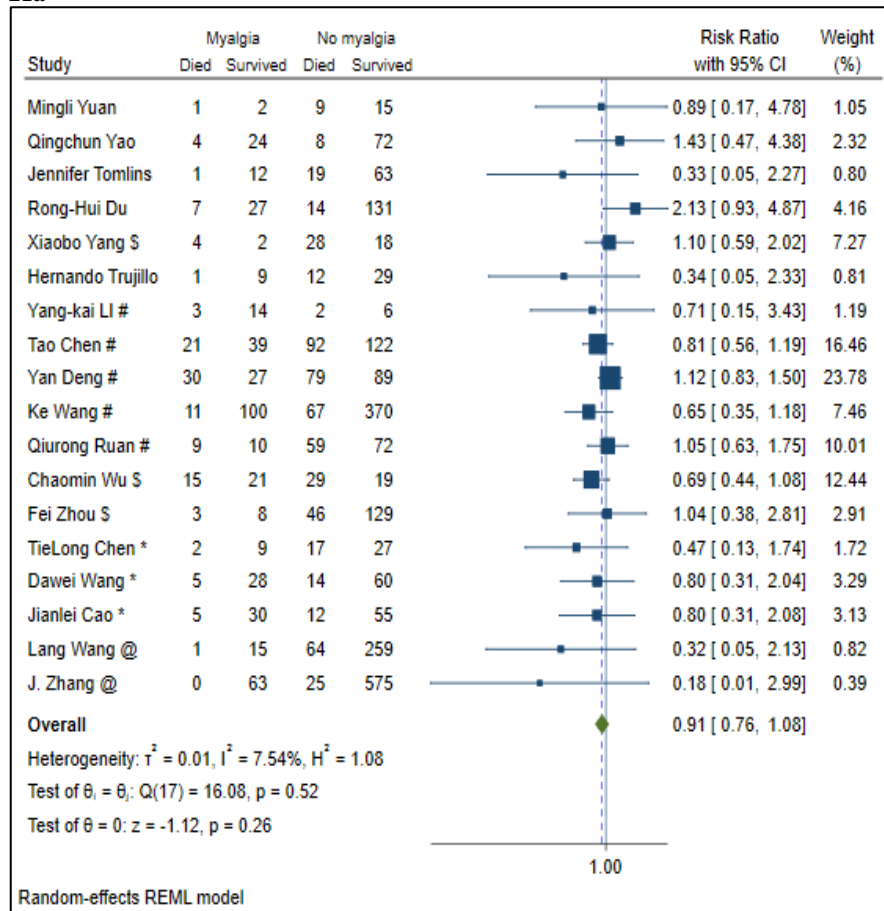

21b

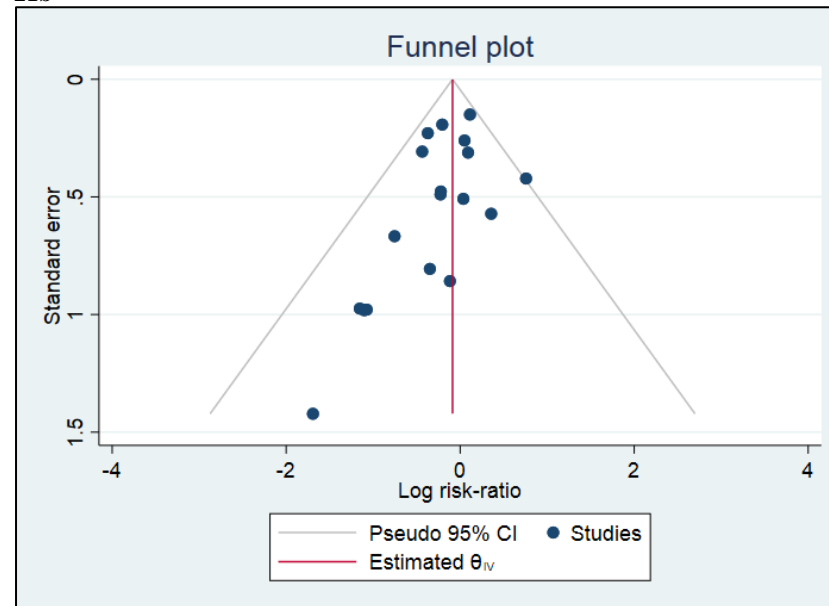

eFigure 22. Pooled Risk ratio of death in patients with headache a) Forest plot b) Funnel Plot

22a

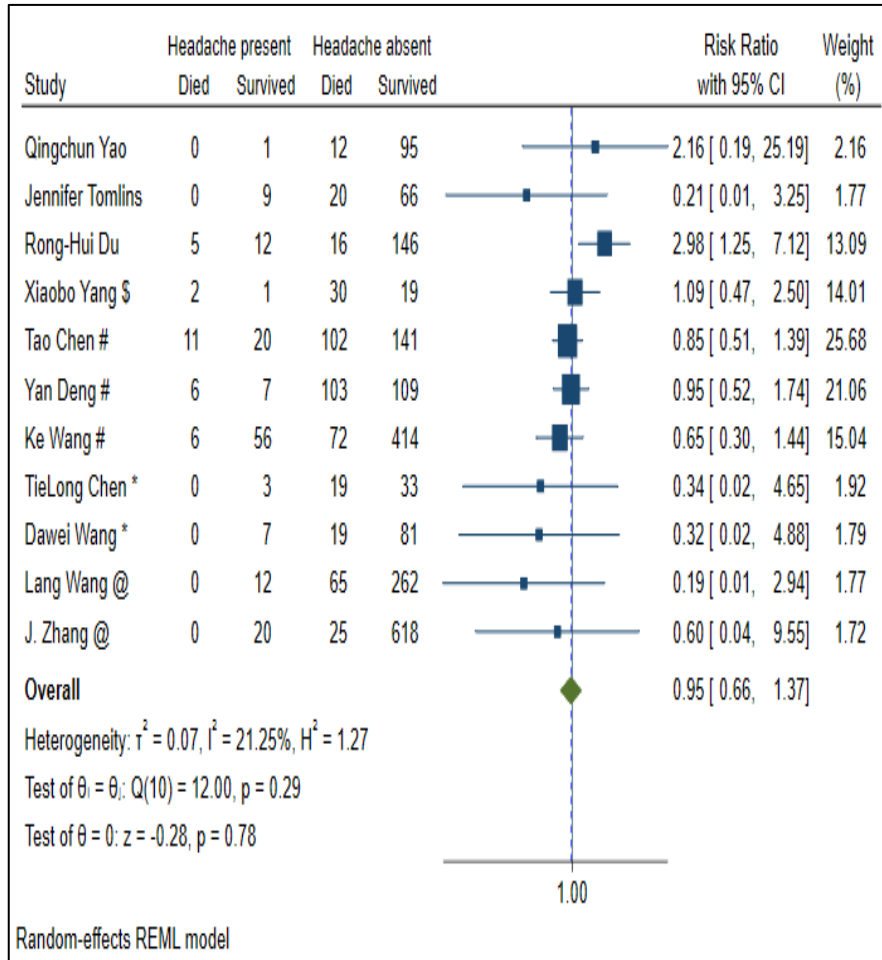

22b

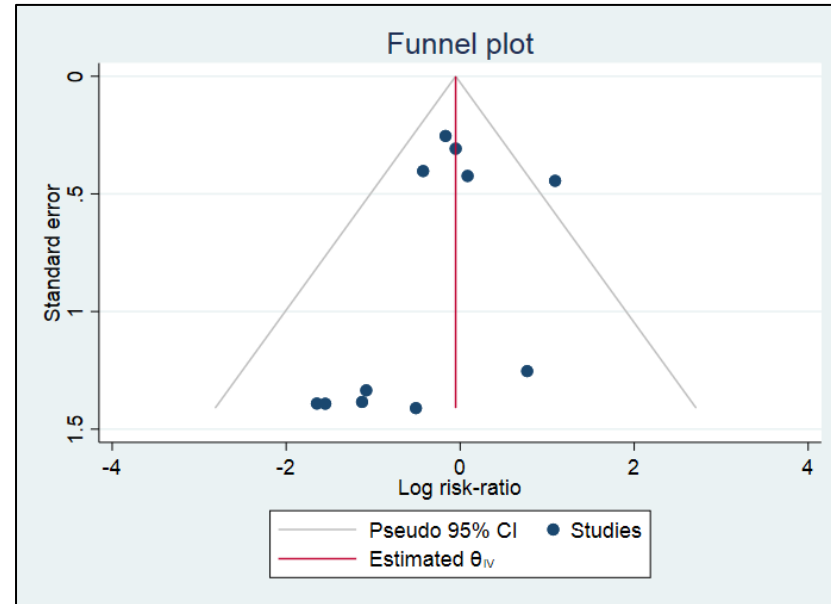

eFigure 23. Pooled Risk ratio of death in patients with anorexia a) Forest plot

23a

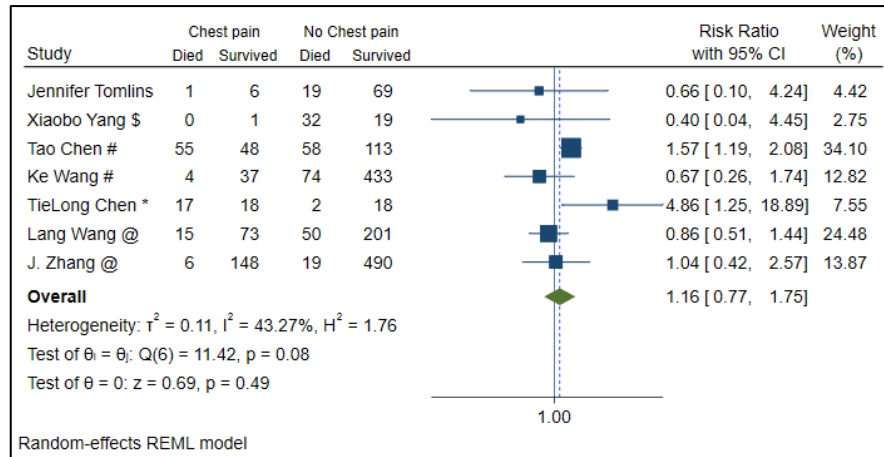

eFigure 24. Pooled Risk ratio of death in patients with chest pain a) Forest plot

24a

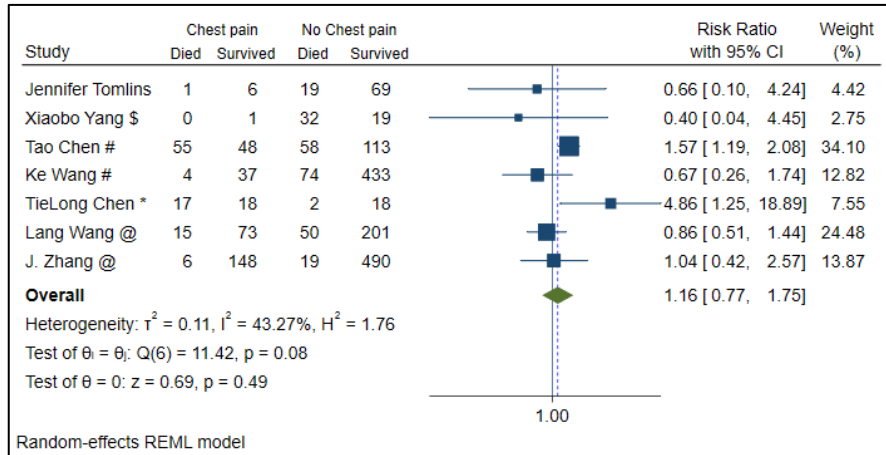

eFigure 25. Pooled Risk ratio of death in patients with dyspnea a) Forest plot b) Funnel Plot c) Subgroup analysis

25a

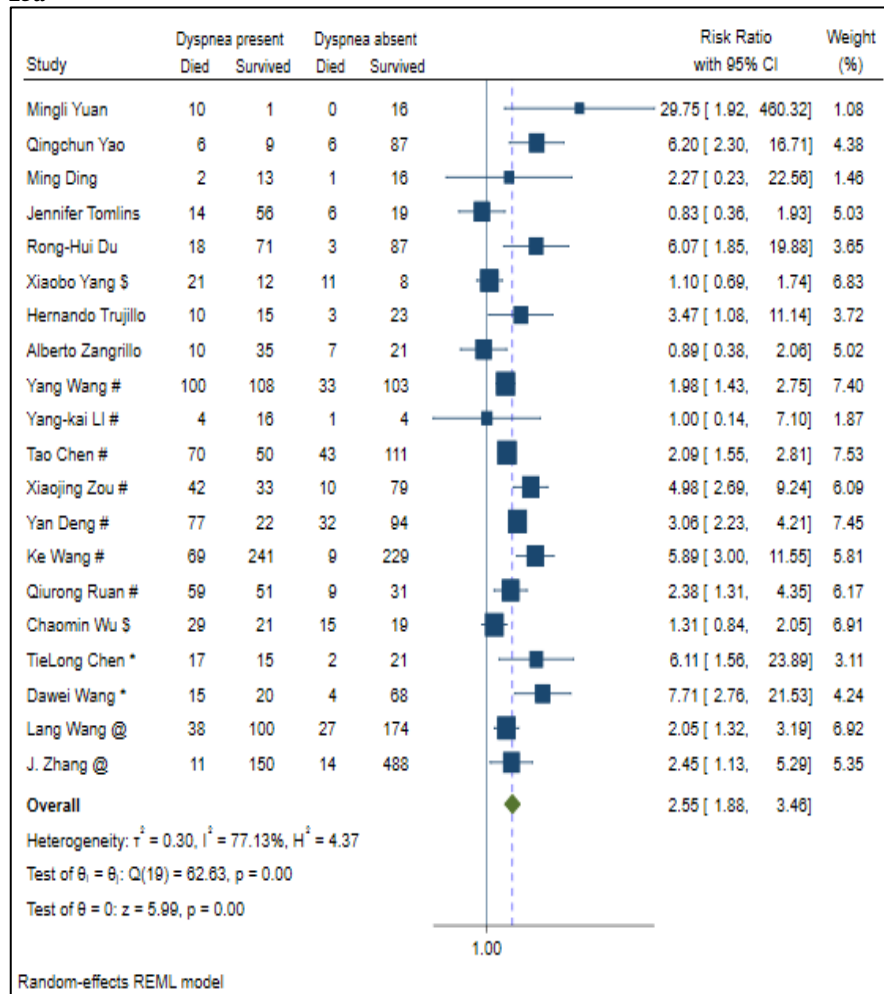

25b

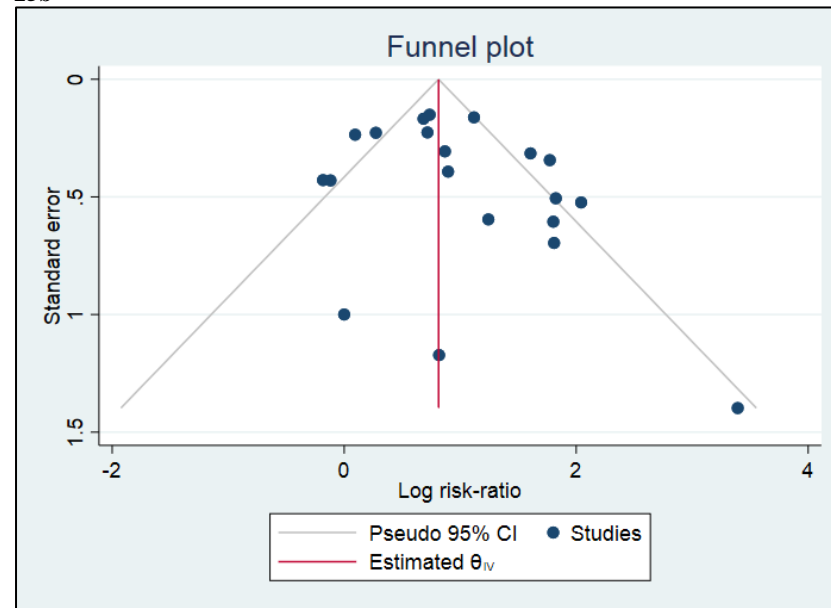

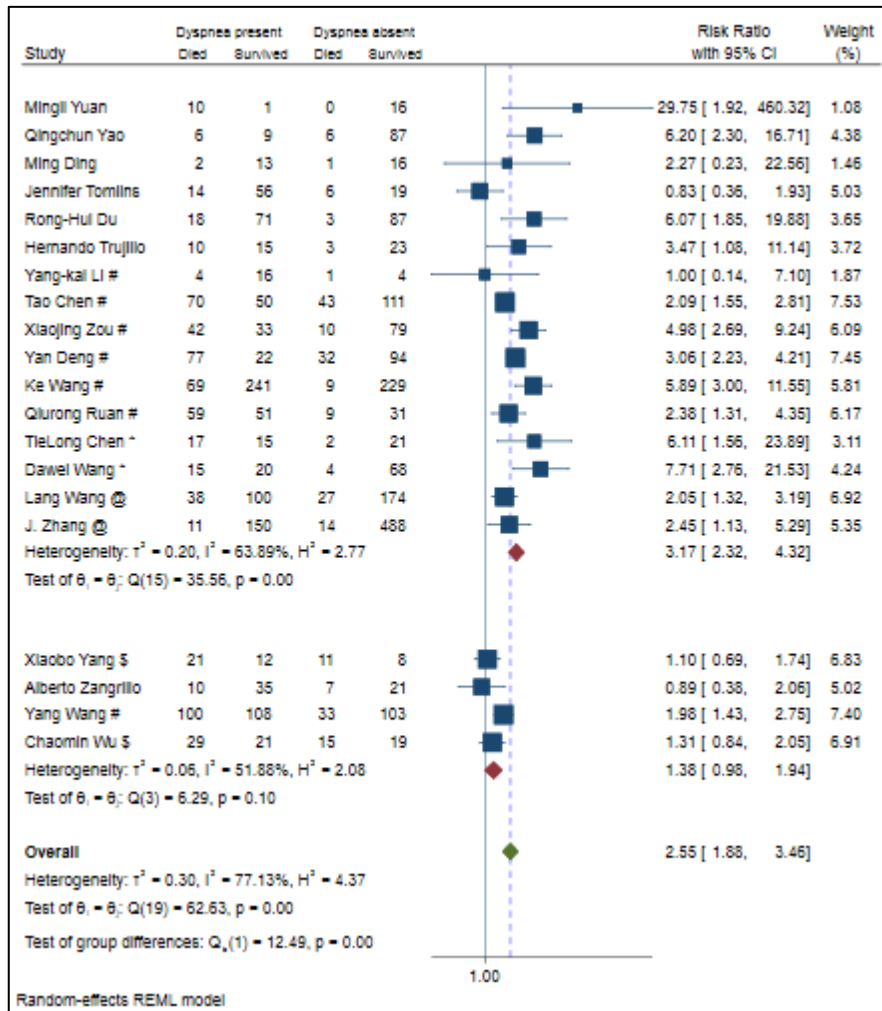



eFigure 26. Pooled Risk ratio of death in patients with hemoptysis a) Forest plot

26a

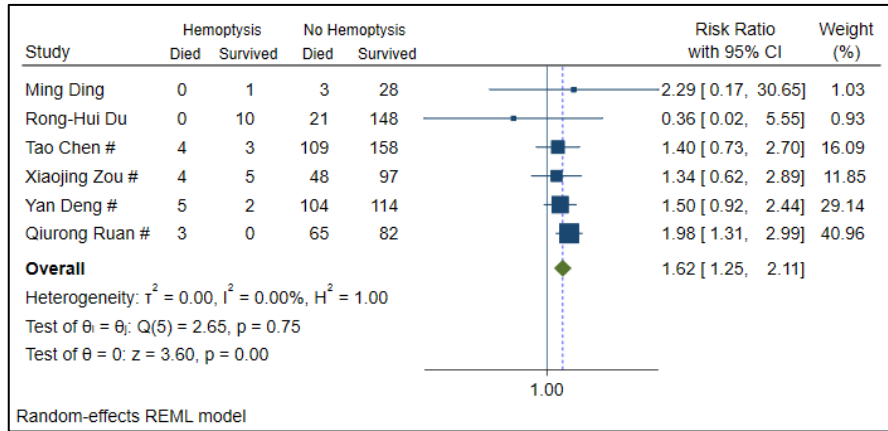

eFigure 27. Pooled Risk ratio of death in patients with Abdomen pain a) Forest plot

27a

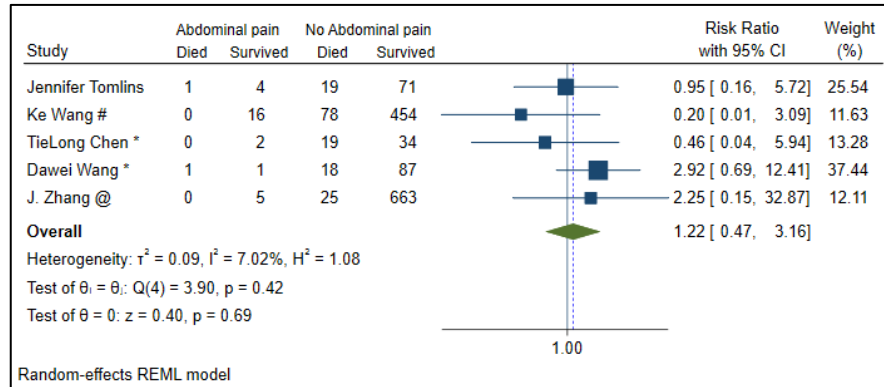

eFigure 28. Pooled Risk ratio of death in patients with Acute respiratory syndrome a) Forest plot b) Funnel Plot c) Subgroup analysis

28a

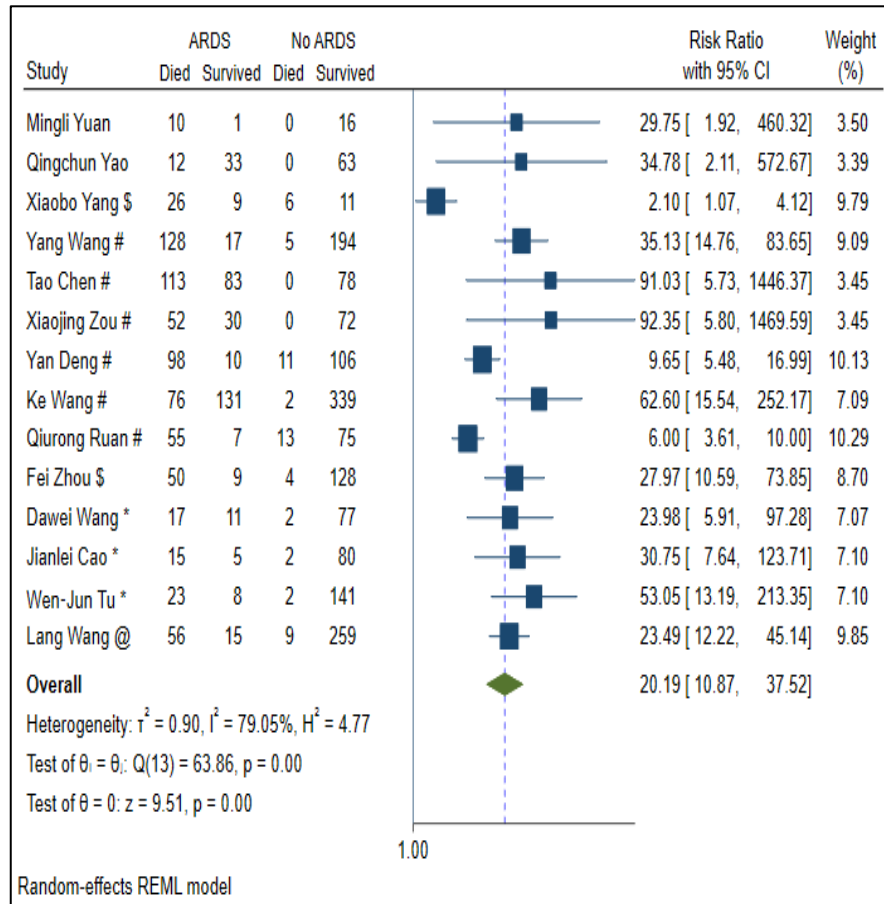

28b

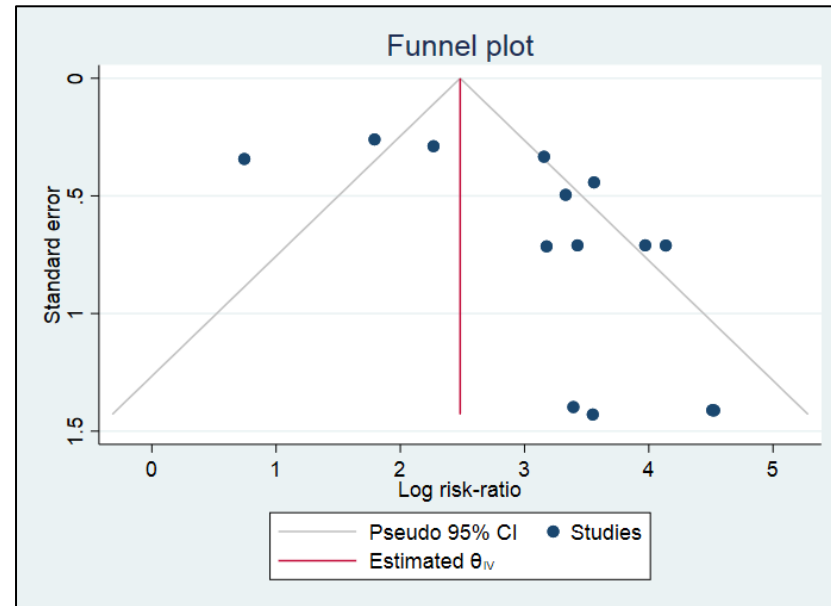

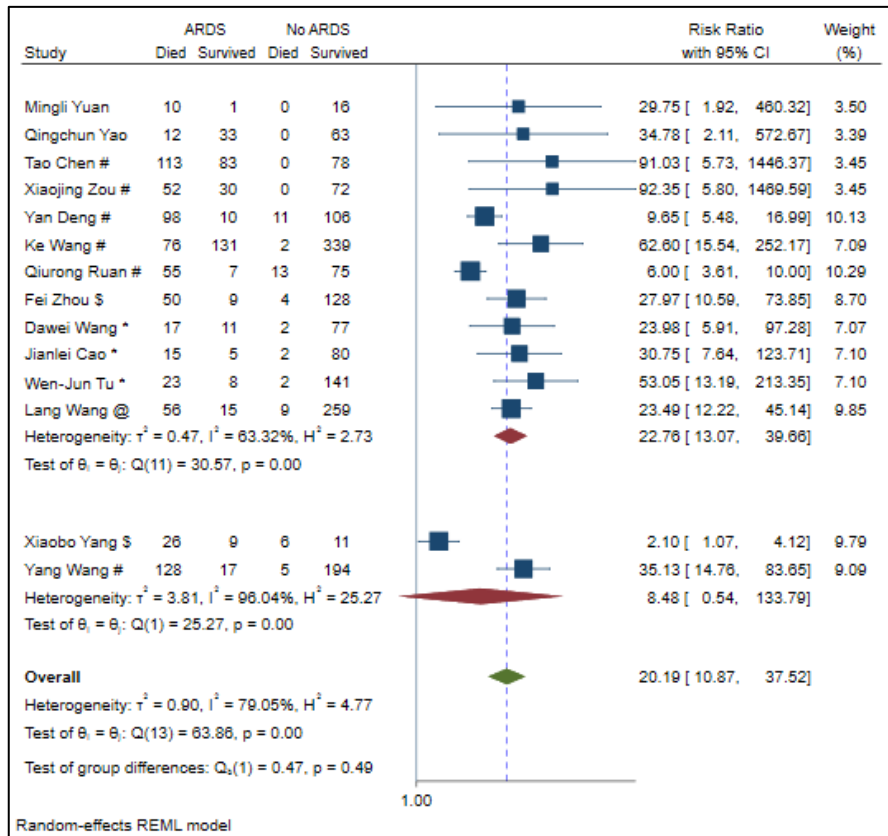

eFigure 29. Pooled Risk ratio of death in patients with shock a) Forest plot b) Funnel Plot c) Subgroup analysis.

29a

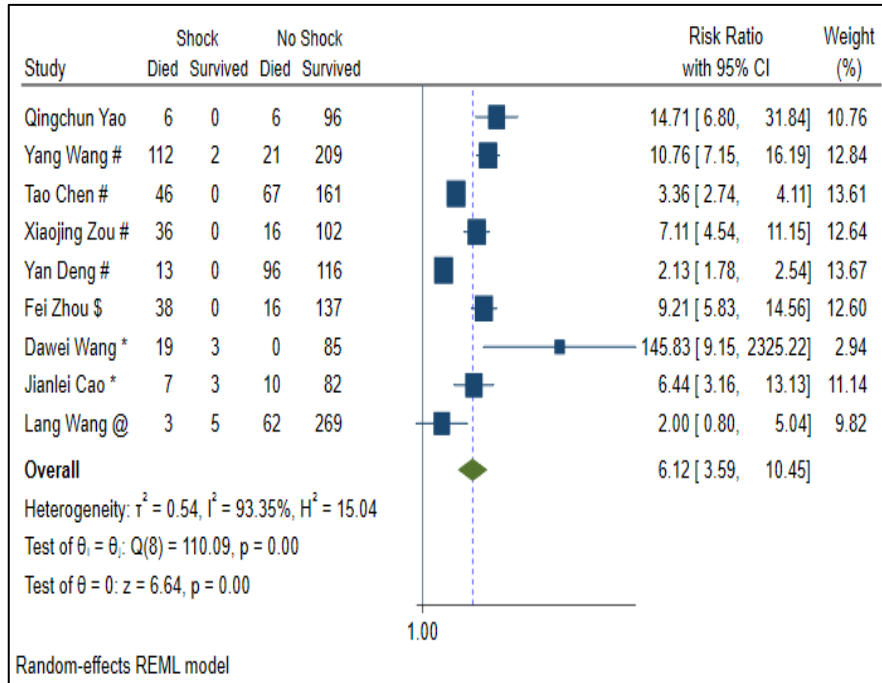

29b

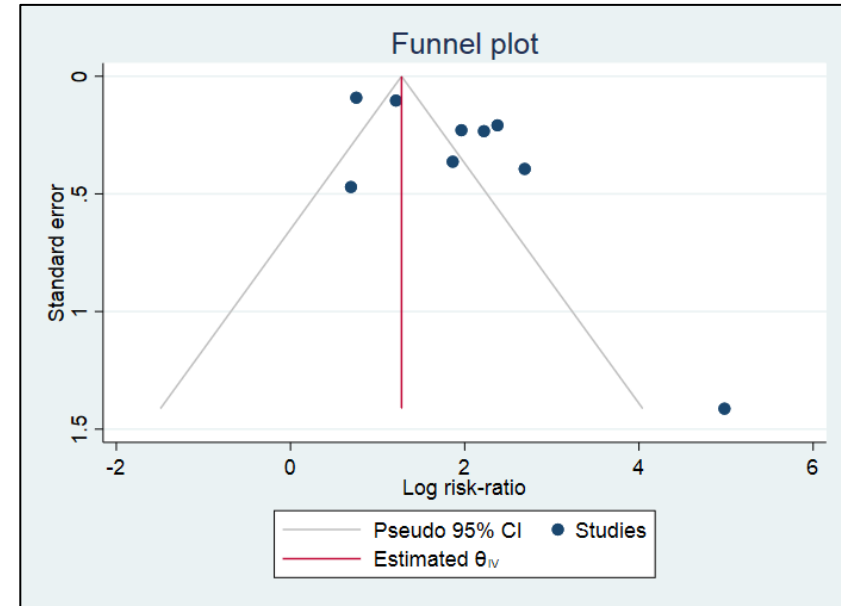

29c

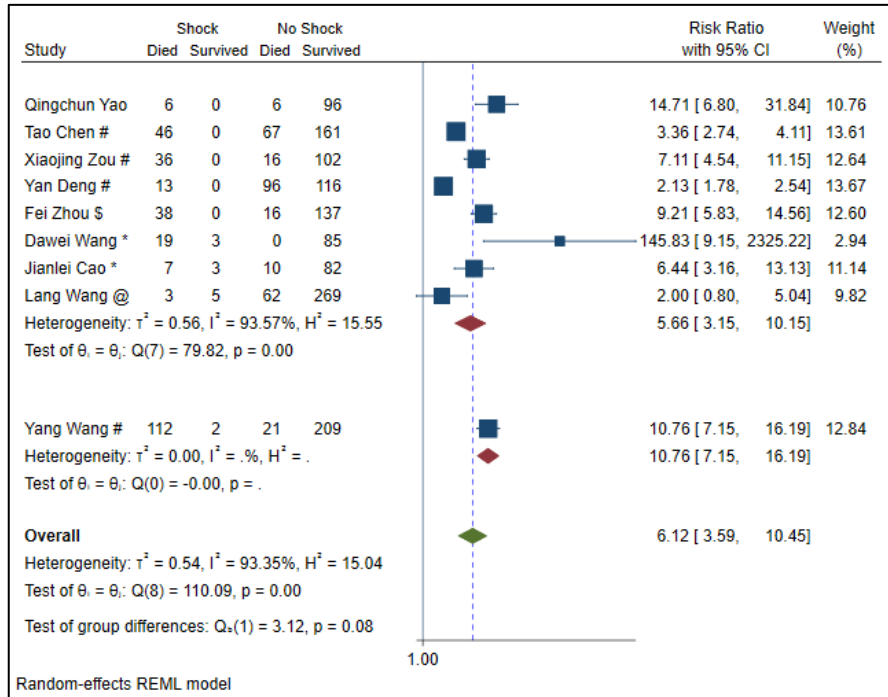

eFigure 30. Pooled Risk ratio of death in patients with sepsis a) Forest plot b) Funnel Plot

30a

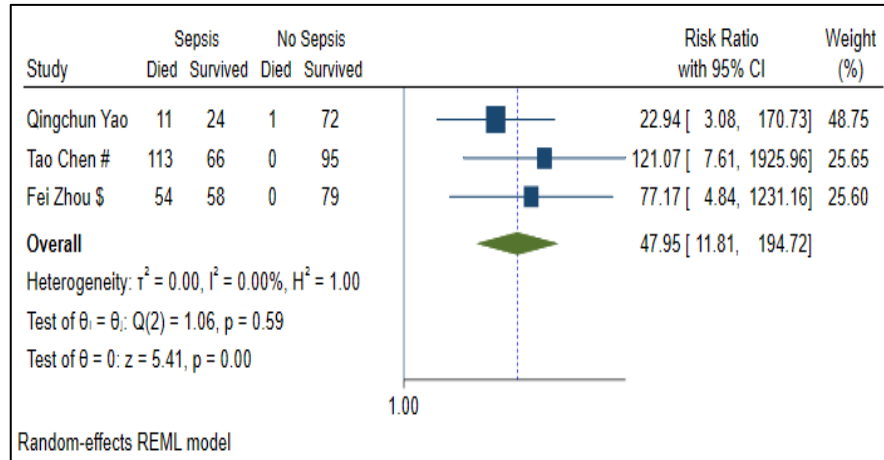

30b

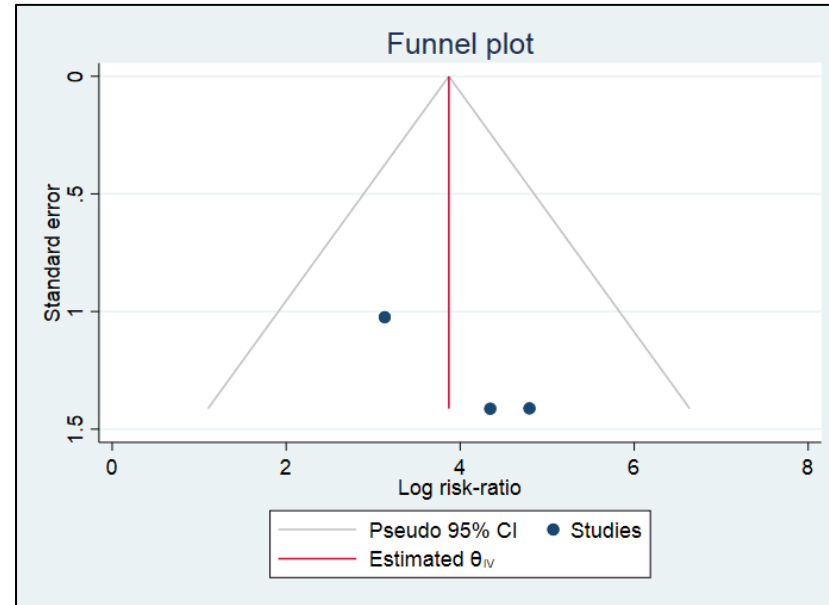

eFigure 31. Pooled Risk ratio of death in patients with bacteremia a) Forest plot b) Funnel Plot c) Subgroup analysis

31a

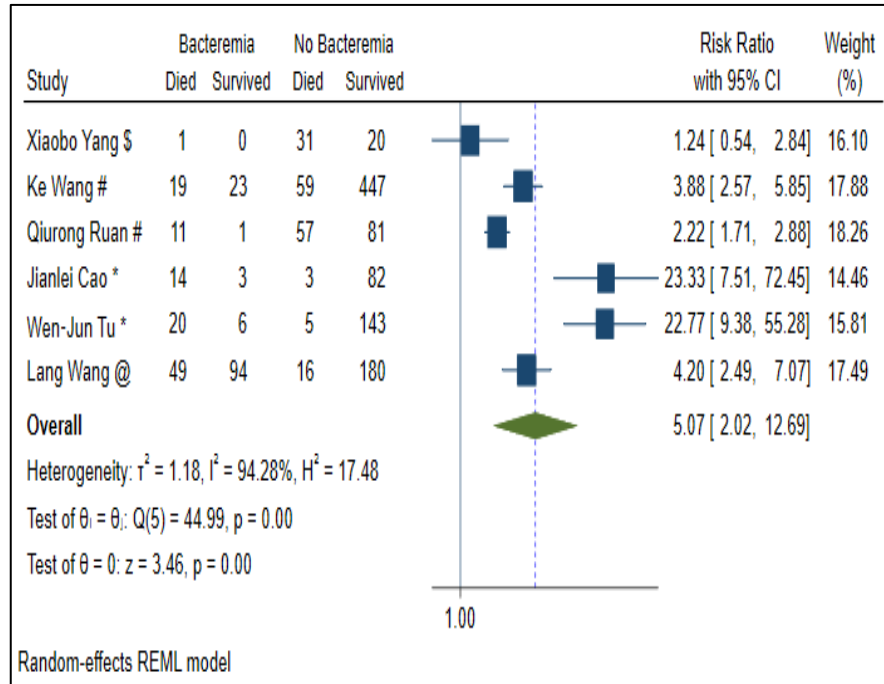

31b

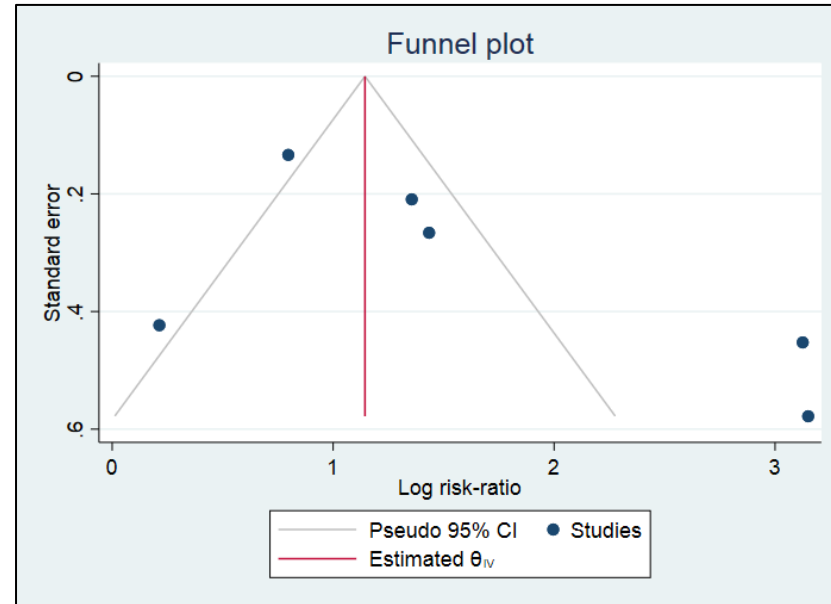



31c

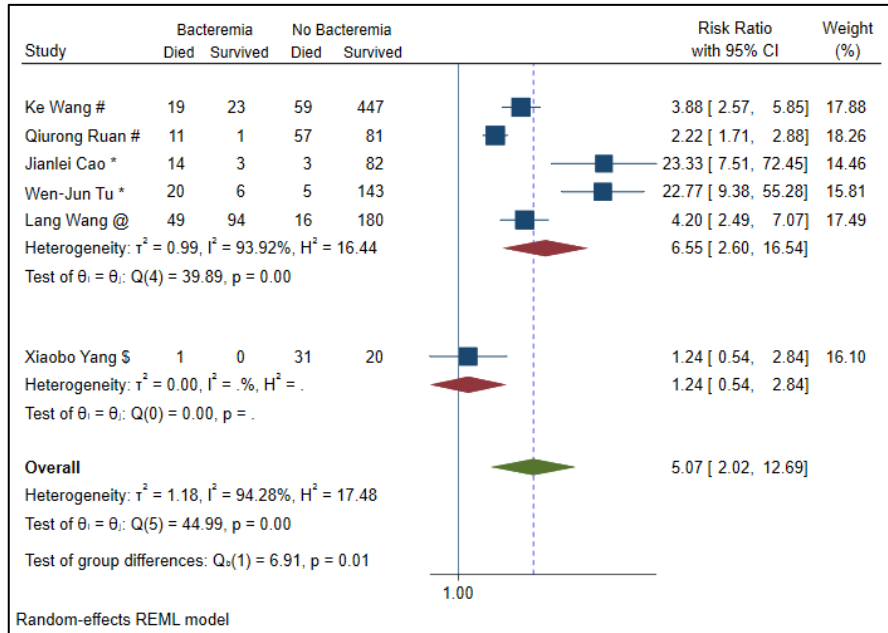

eFigure 32. Pooled Risk ratio of death in patients with Acute cardiac injury a) Forest plot b) Funnel Plot c) Subgroup analysis

32a

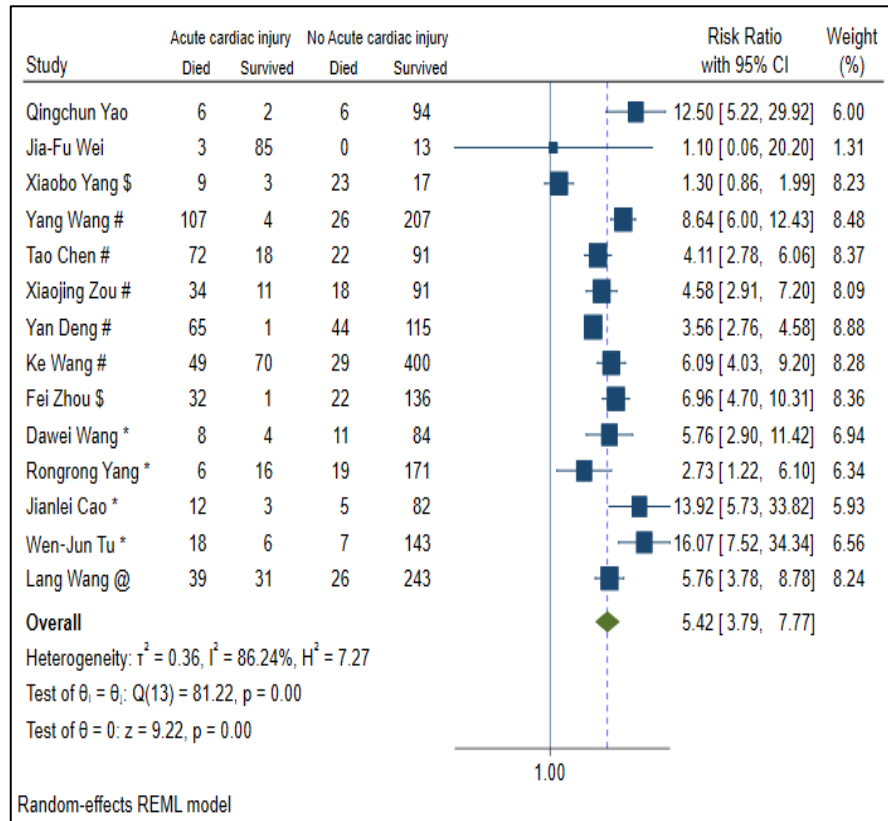

32b

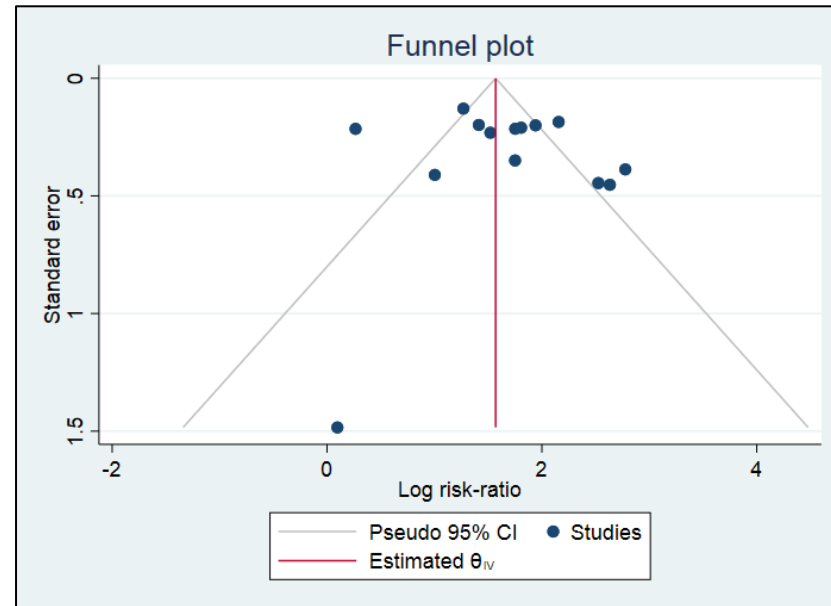

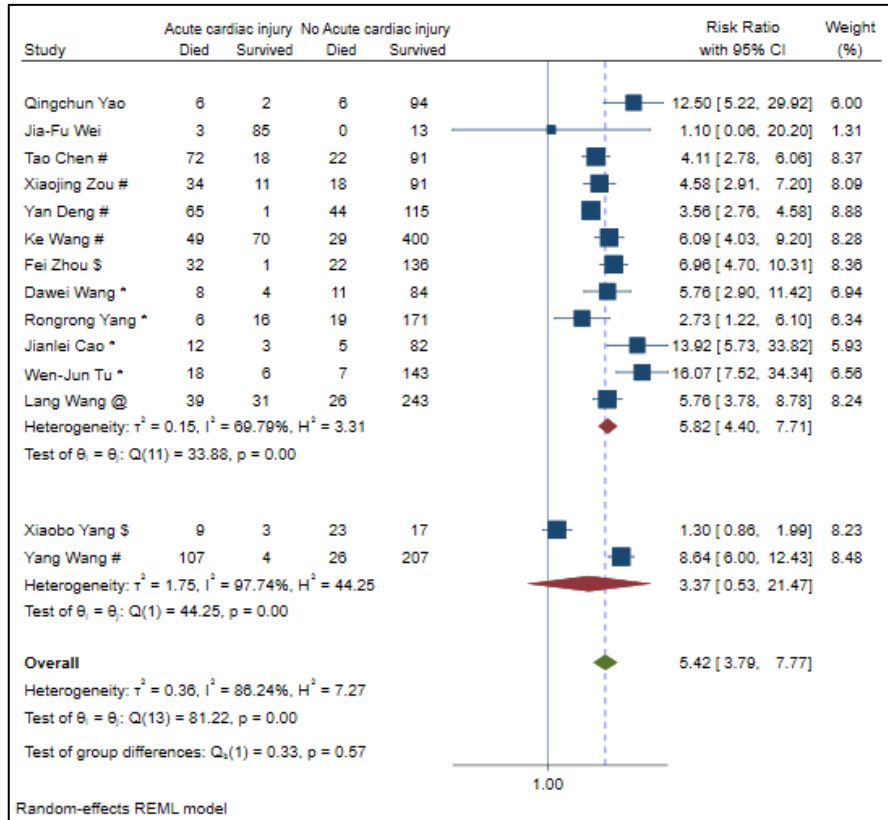

eFigure 33. Pooled Risk ratio of death in patients with Acute heart failure a) Forest plot

33a

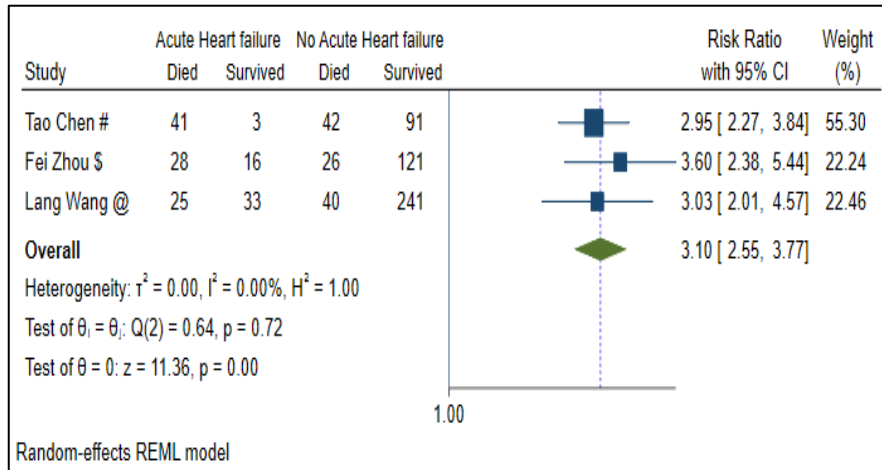

eFigure 34. Pooled Risk ratio of death in patients with DIC a) Forest plot b) Subgroup analysis

**34a**

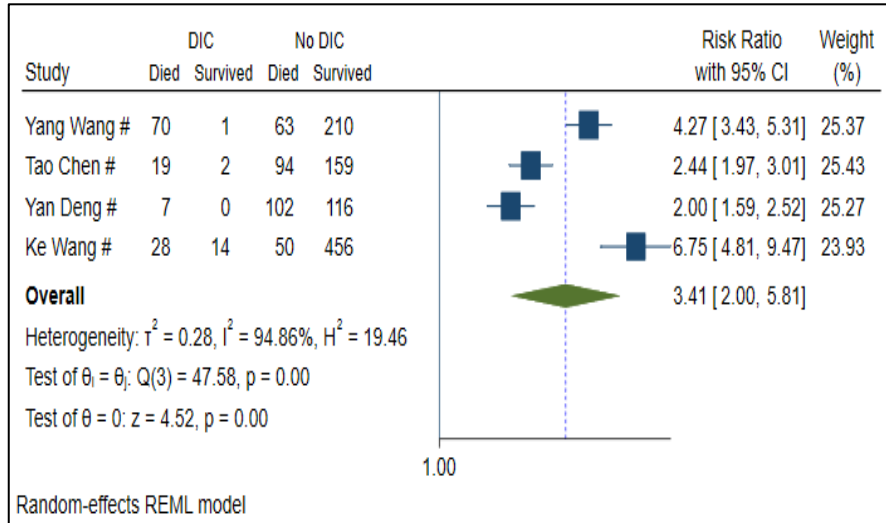

34b

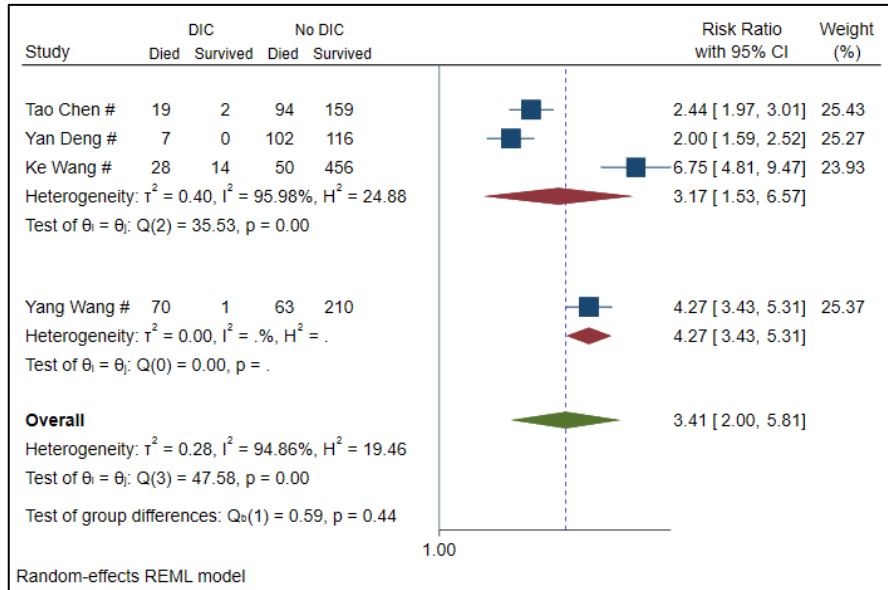

eFigure 35. Pooled Risk ratio of death in patients with GI bleeding a) Forest plot b) Subgroup analysis

35a

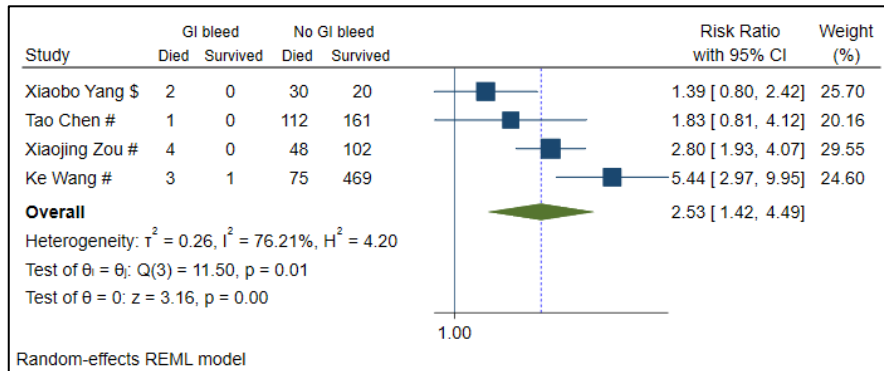

35b

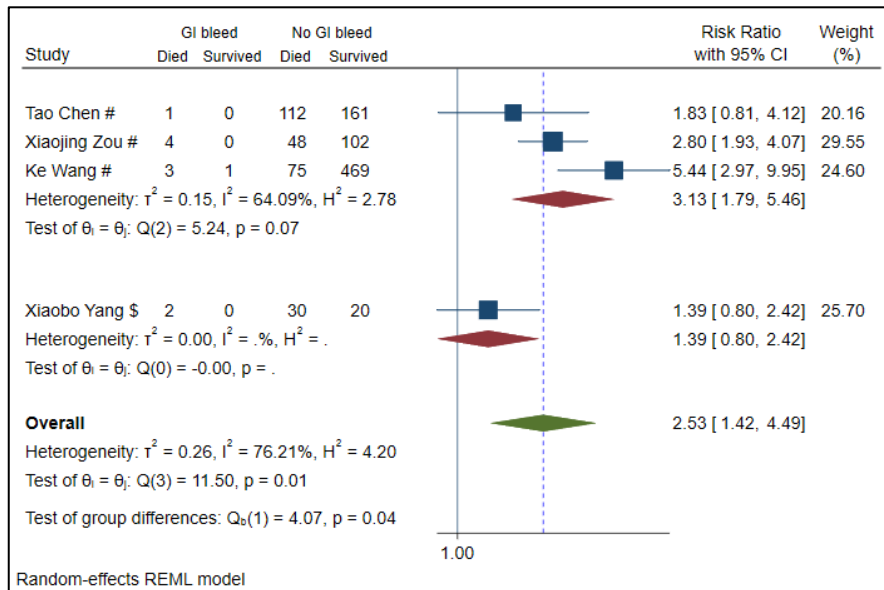

eFigure 36. Pooled Risk ratio of death in patients with Acute Kidney Injury a) Forest plot b) Funnel Plot c) Subgroup analysis.

36a

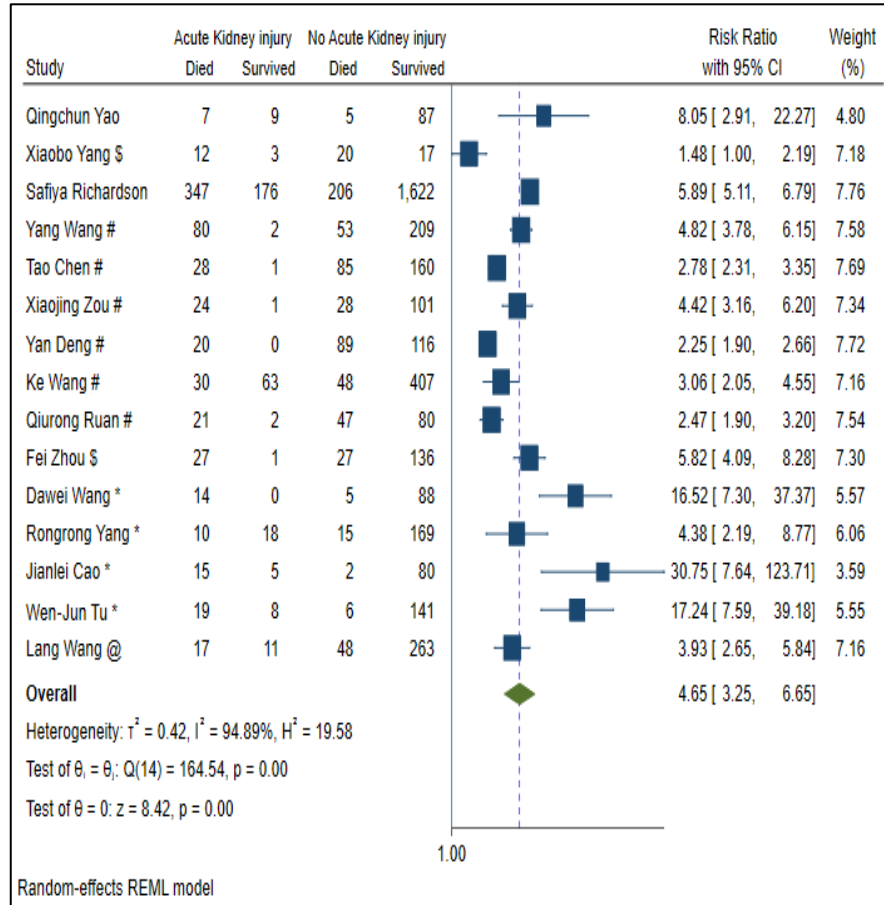

36b

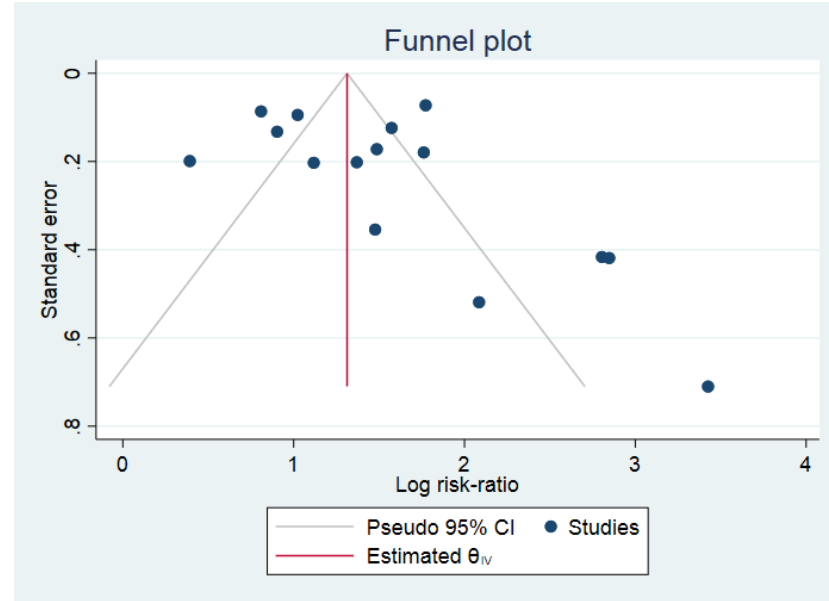



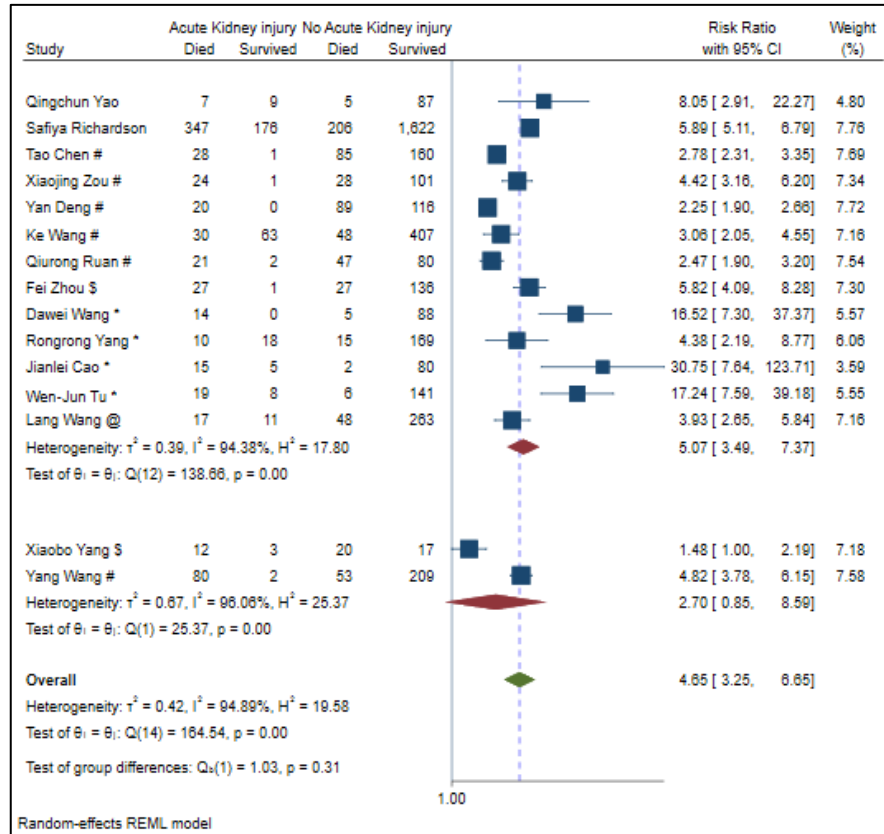

eFigure 37. Pooled Risk ratio of death in patients with liver dysfunction a) Forest plot b) Funnel Plot c) Subgroup analysis

37a

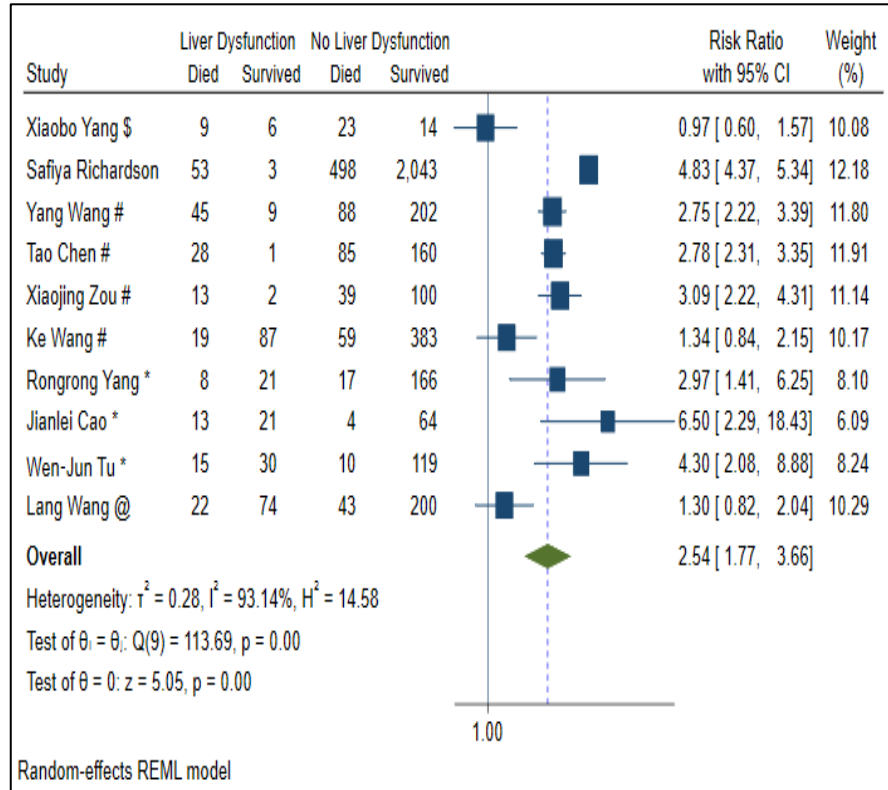

37b

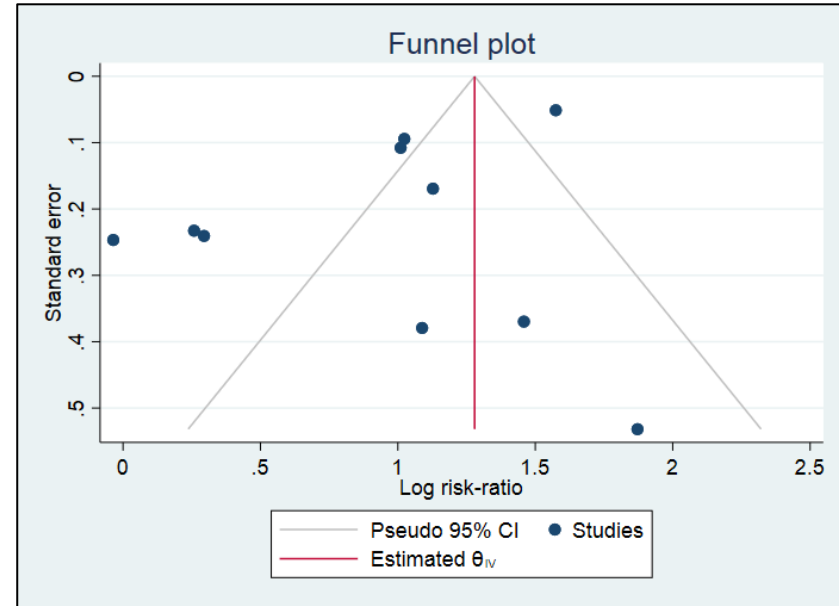

37c

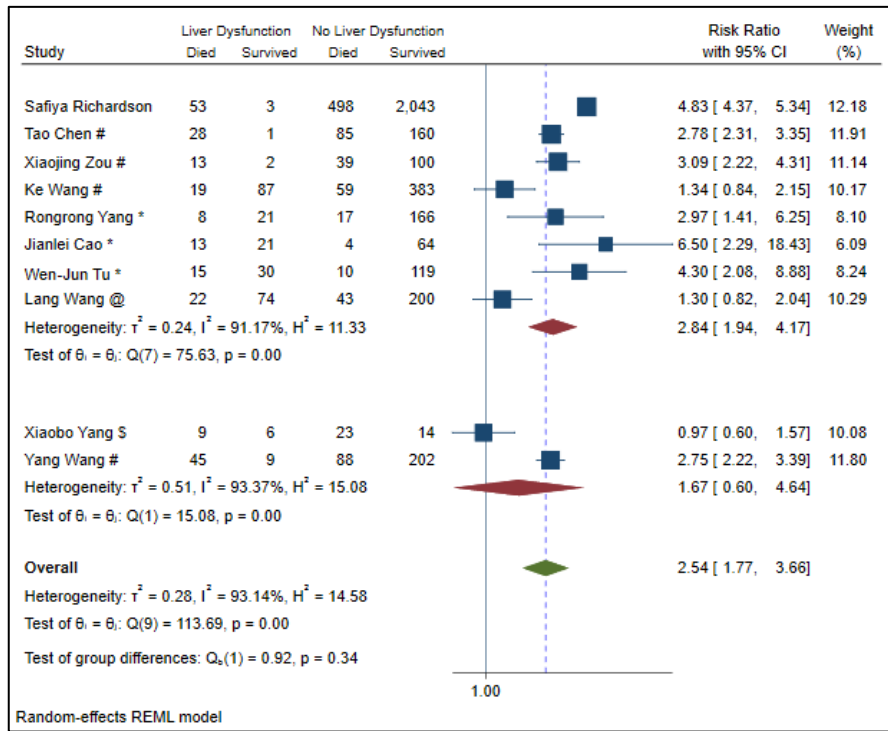

eFigure 38. Pooled Risk ratio of death in patients with Decreased TLC - Forest plot

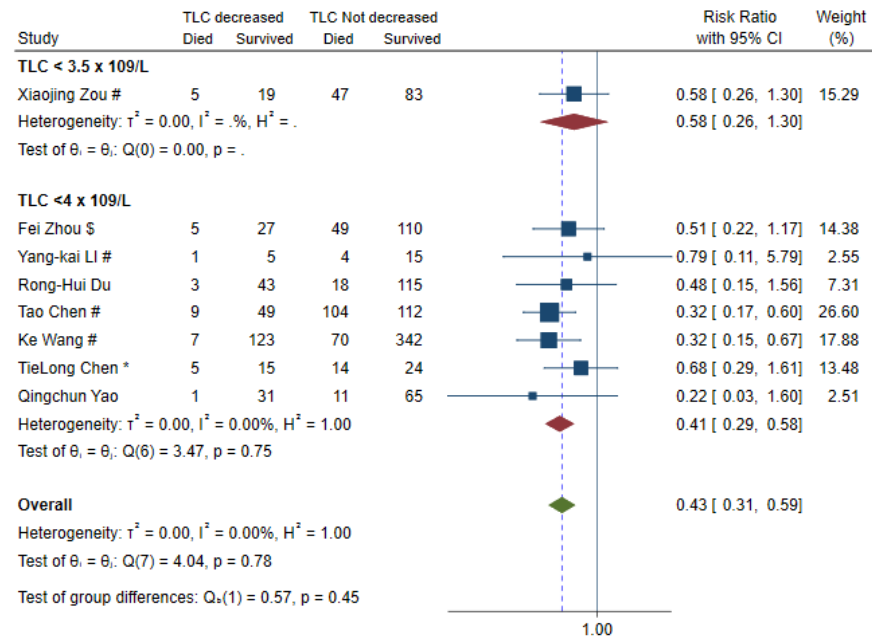

Random-effects REML model

eFigure 39. Pooled Risk ratio of death in patients with Increased TLC – Forest plot

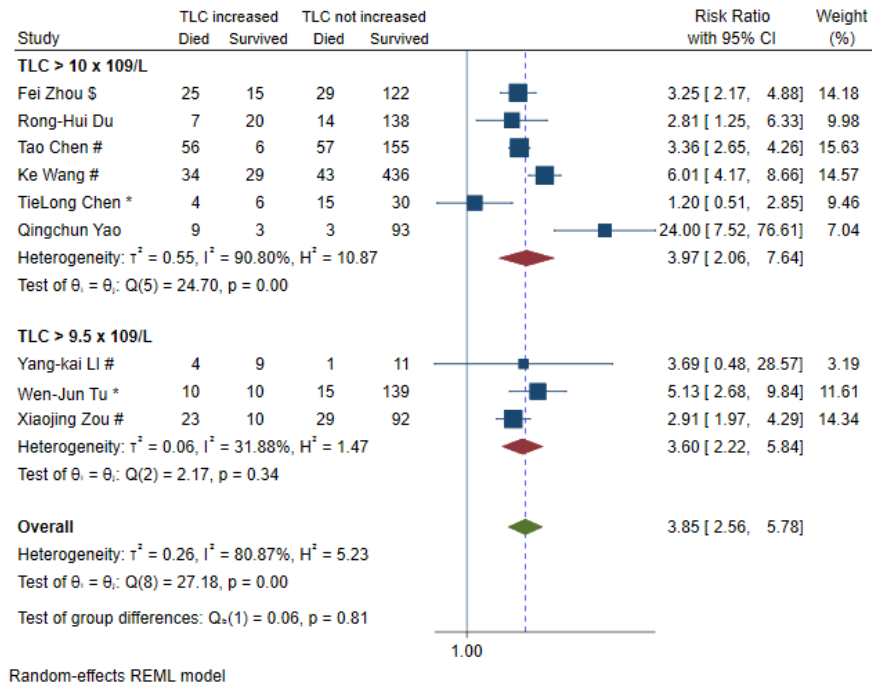

eFigure 40. Pooled Risk ratio of death in patients with Decreased Neutrophil - Forest plot

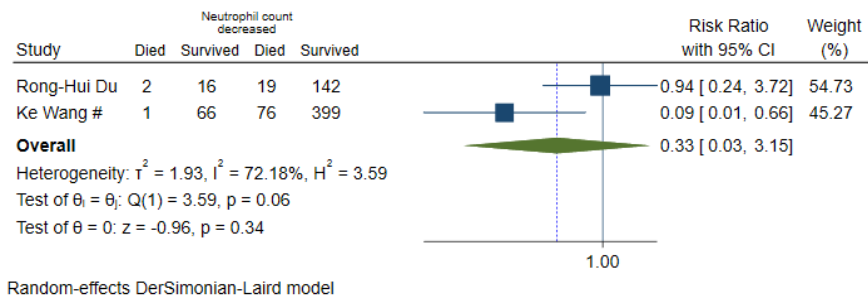

eFigure 41. Pooled Risk ratio of death in patients with Increased Neutrophil - Forest plot

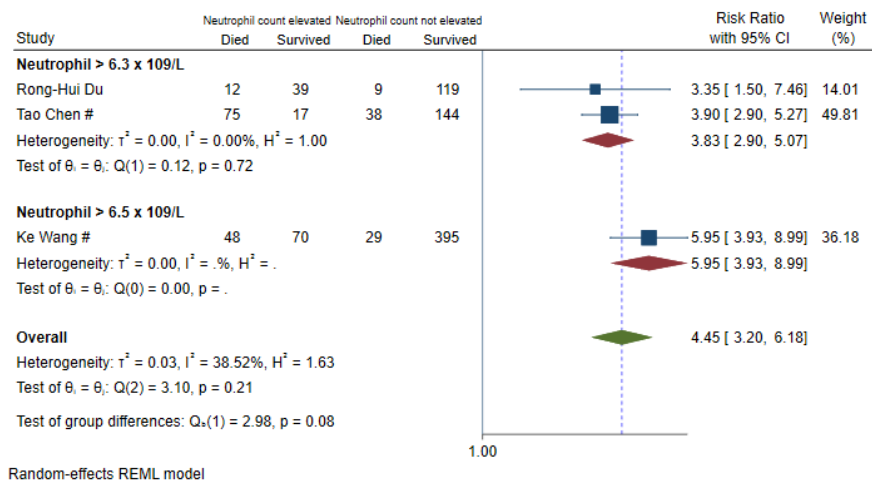

eFigure 42. Pooled Risk ratio of death in patients with Decreased lymphocyte - Forest plot.

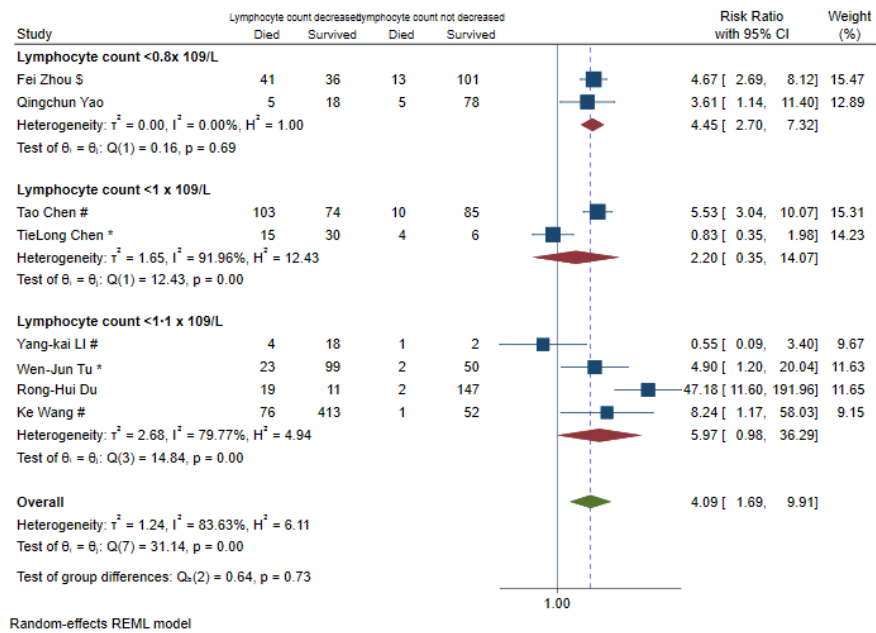



eFigure 43. Pooled Risk ratio of death in patients with Decreased Platelet - Forest plot

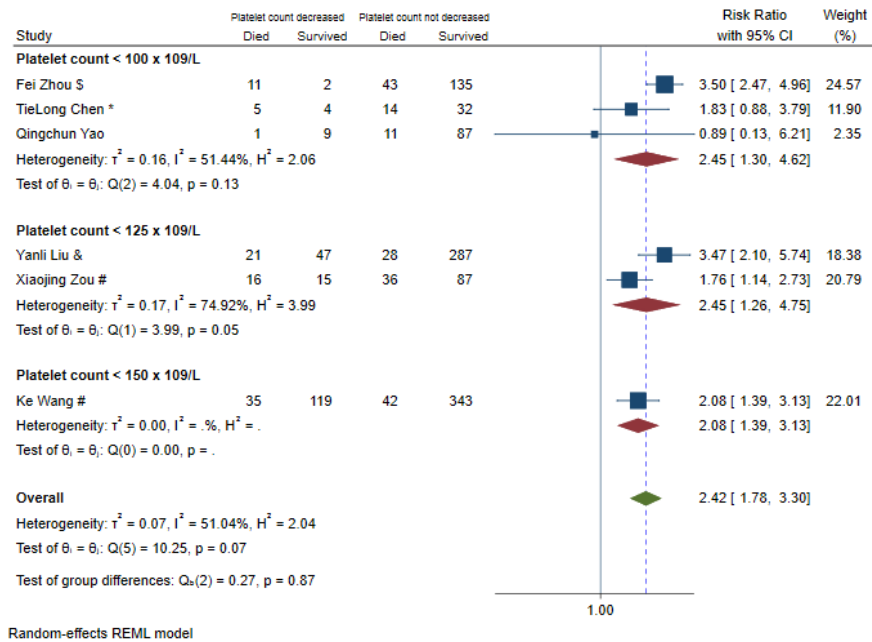

eFigure 44. Pooled Risk ratio of death in patients with Decreased Albumin - Forest plot

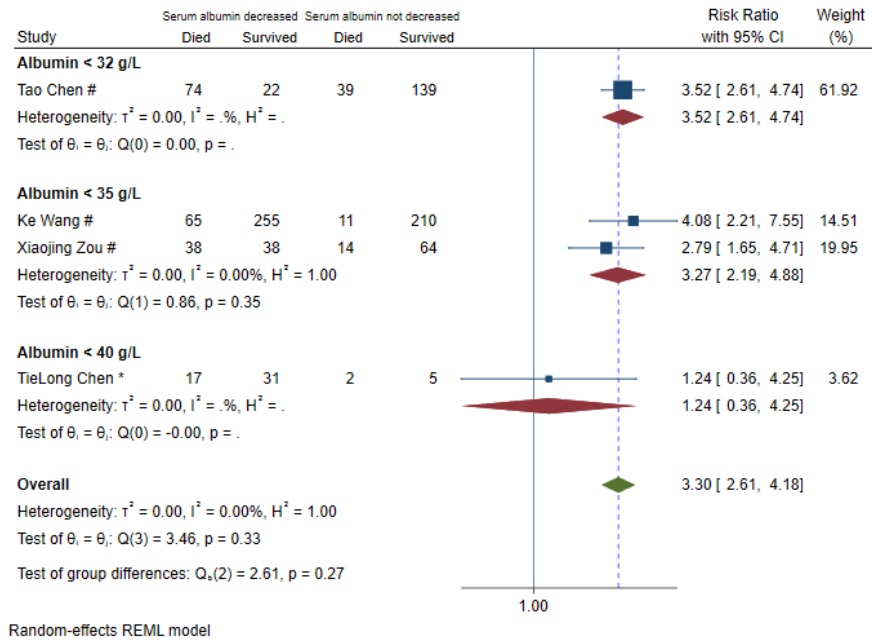

eFigure 45. Pooled Risk ratio of death in patients with Increased Globulin - Forest plot

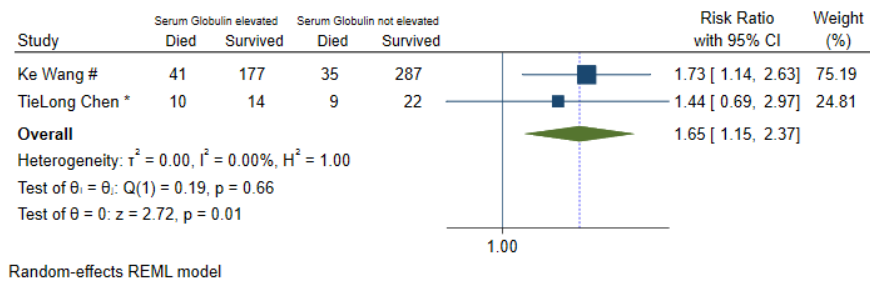

eFigure 46. Pooled Risk ratio of death in patients with Increased Globulin - Forest plot



eFigure 47. Pooled Risk ratio of death in patients with Increased T Bilirubin - Forest plot

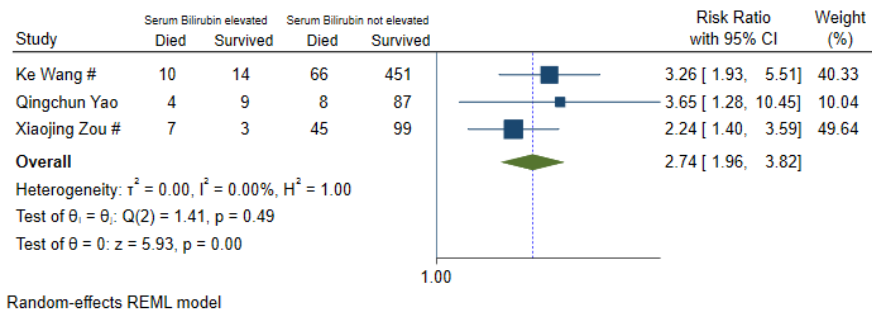

eFigure 48. Pooled Risk ratio of death in patients with Increased AST- Forest plot.

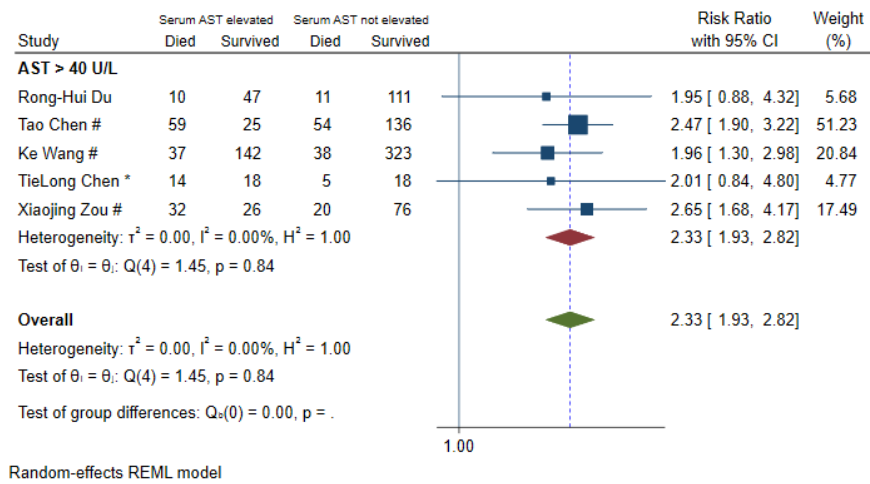

eFigure 49. Pooled Risk ratio of death in patients with Increased ALT- Forest plot.

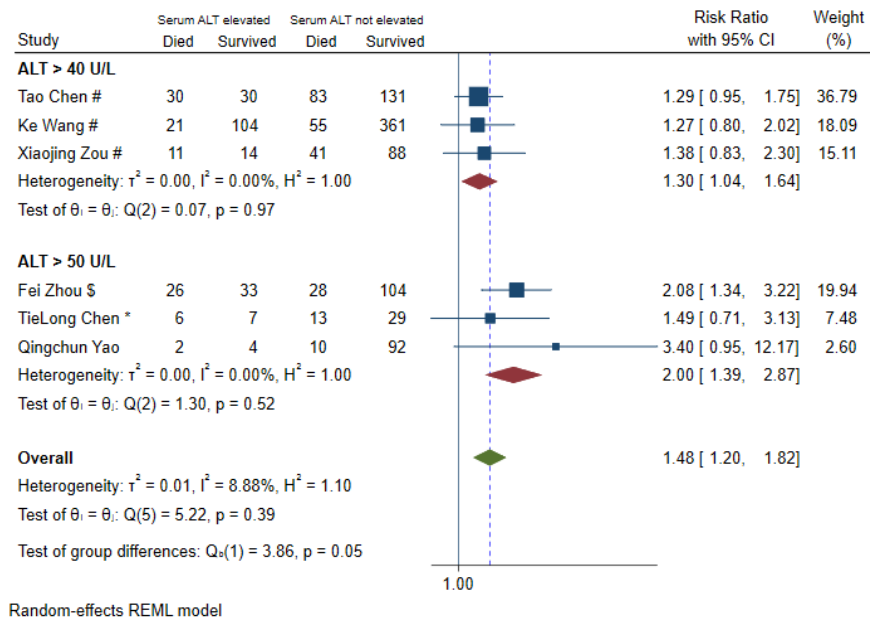

eFigure 50. Pooled Risk ratio of death in patients with Increased PT- Forest plot.

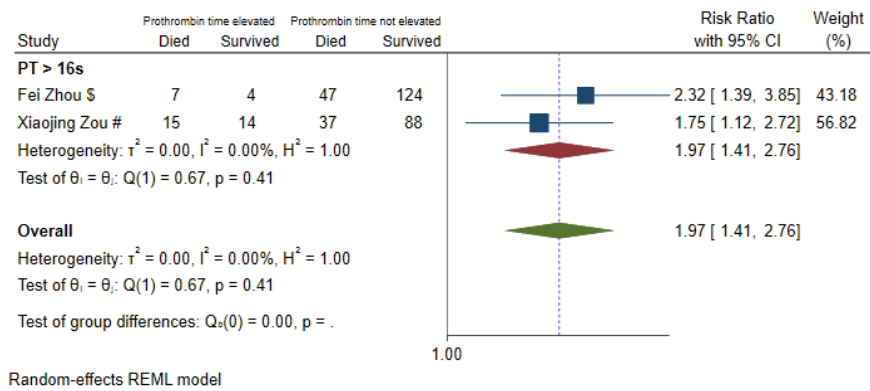



eFigure 51. Pooled Risk ratio of death in patients with Increased CK Total- Forest plot

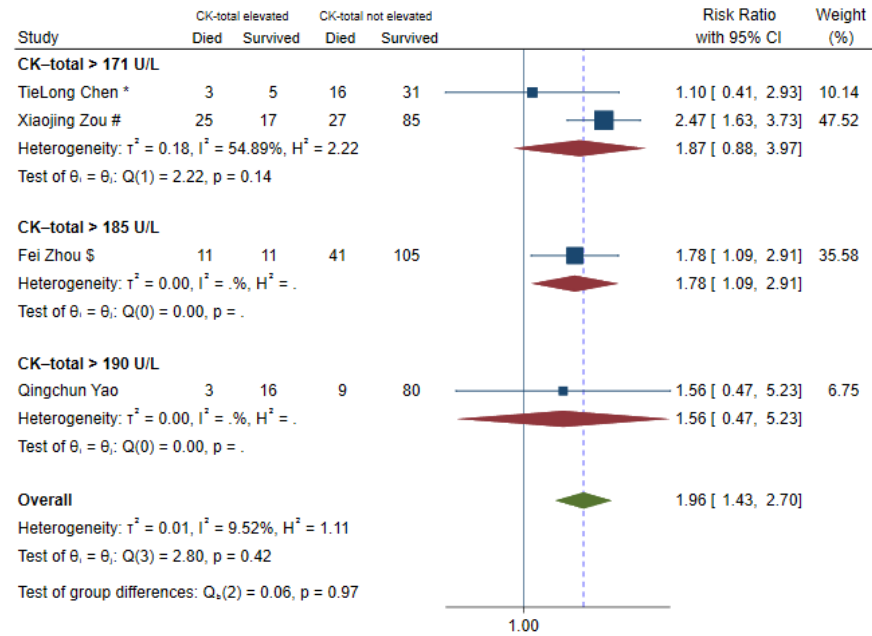

Random-effects REML model

eFigure 52. Pooled Risk ratio of death in patients with Increased CK MB- Forest plot

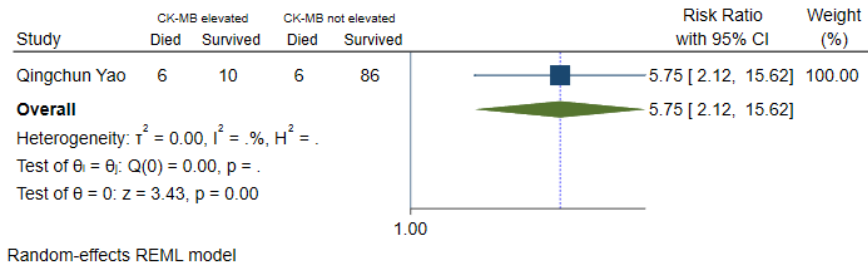

eFigure 53. Pooled Risk ratio of death in patients with Increased BUN- Forest plot

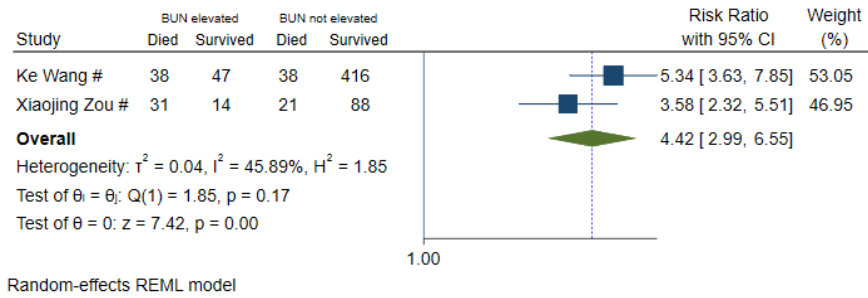

eFigure 54. Pooled Risk ratio of death in patients with Increased Creatinine- Forest plot

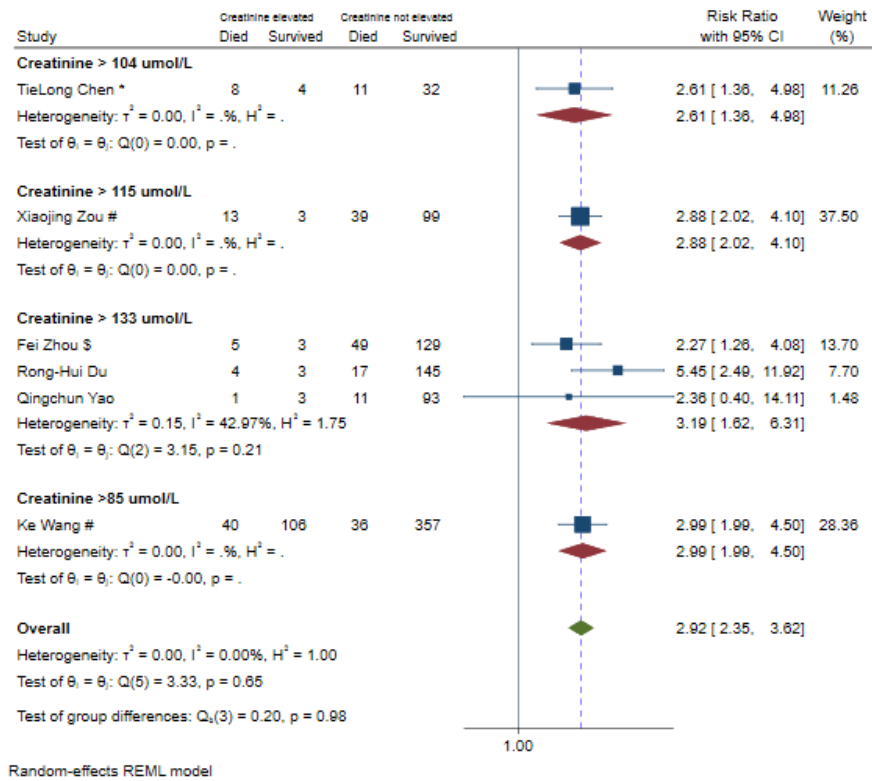

eFigure 55. Pooled Risk ratio of death in patients with Increased Na<sup>+</sup> - Forest plot

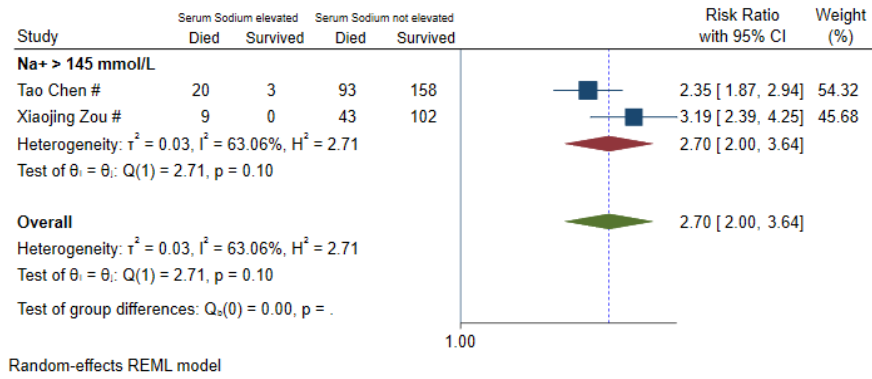

eFigure 56. Pooled Risk ratio of death in patients with Increased K<sup>+</sup> - Forest plot

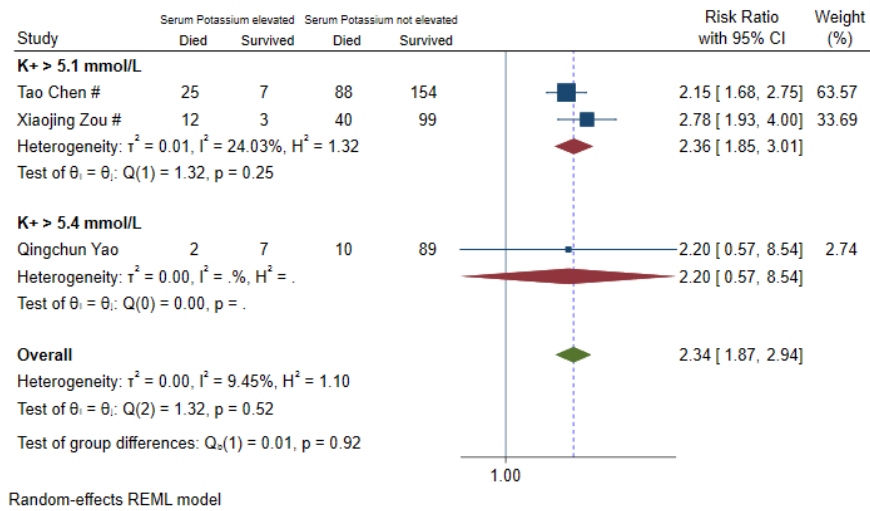

eFigure 57. Pooled Risk ratio of death in patients with Elevated LDH - Forest plot

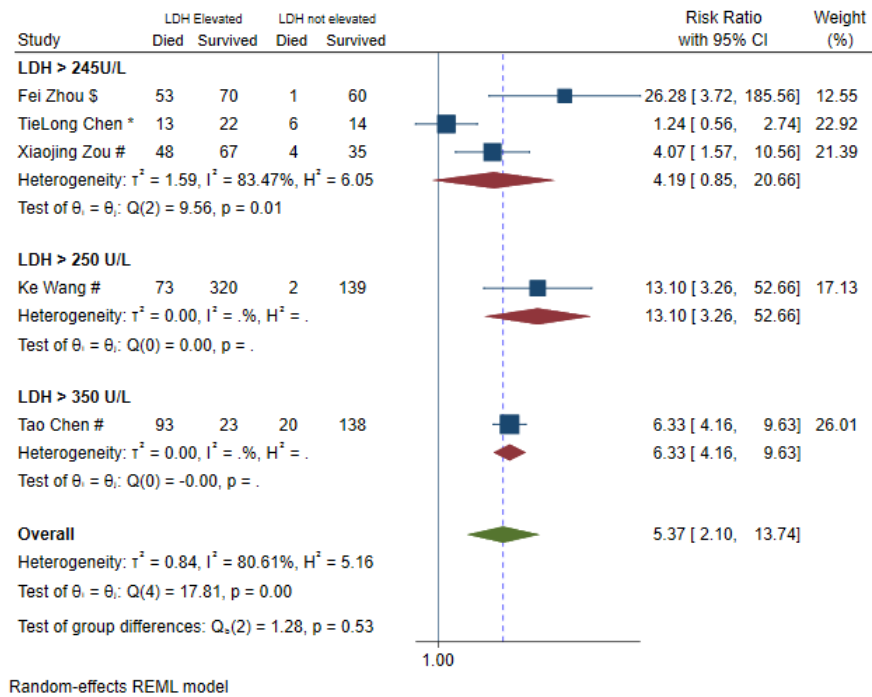

eFigure 58. Pooled Risk ratio of death in patients with Elevated D-Dimer - Forest plot

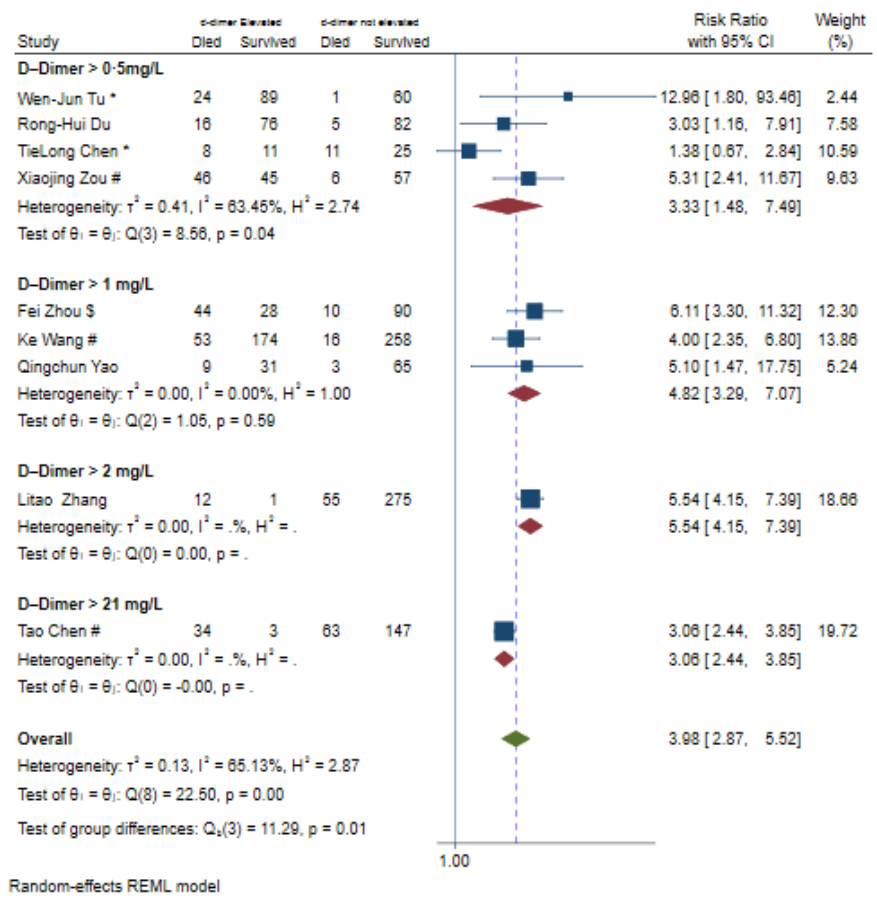



eFigure 59. Pooled Risk ratio of death in patients with Increased CRP - Forest plot

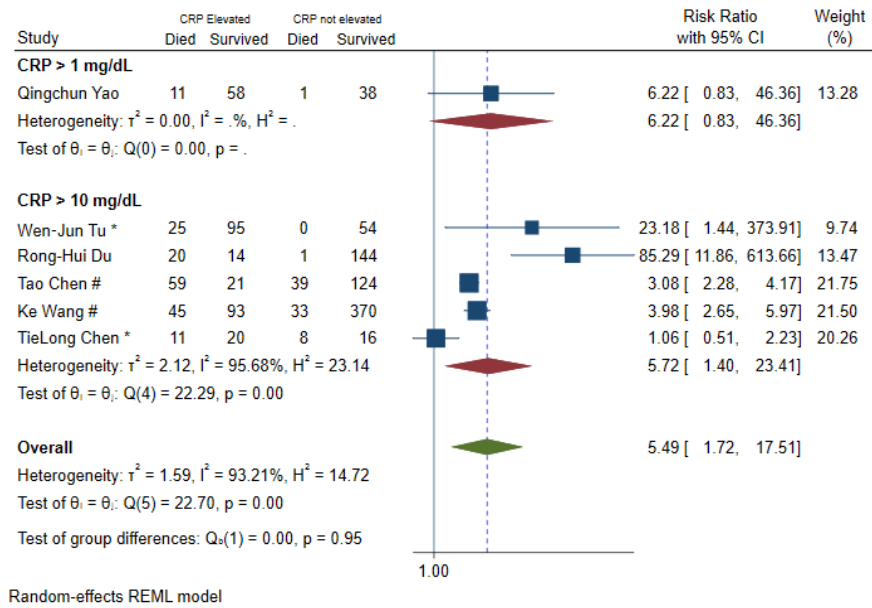

eFigure 60. Pooled Risk ratio of death in patients with Elevated ESR - Forest plot

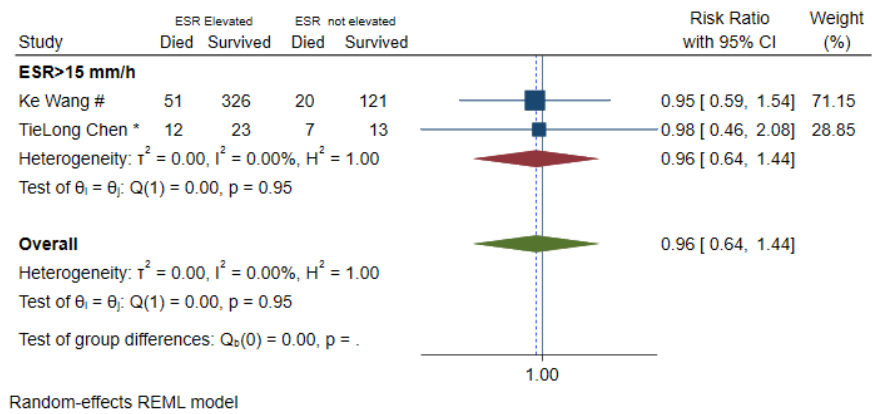

eFigure 61. Pooled Risk ratio of death in patients with Elevated Procalcitonin - Forest plot

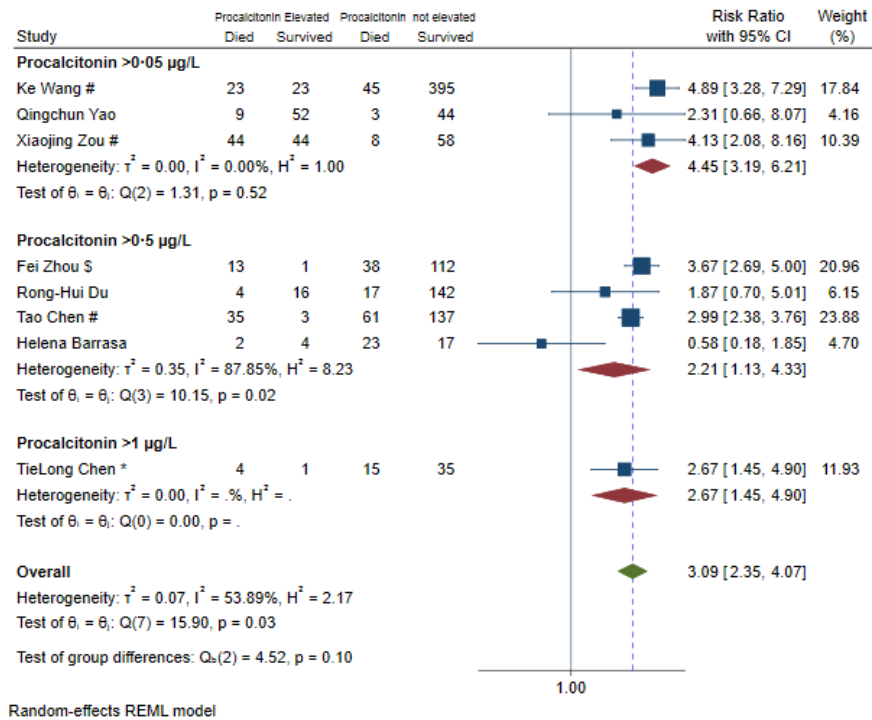

eFigure 62. Pooled Risk ratio of death in patients with Increased IL-6- Forest plot

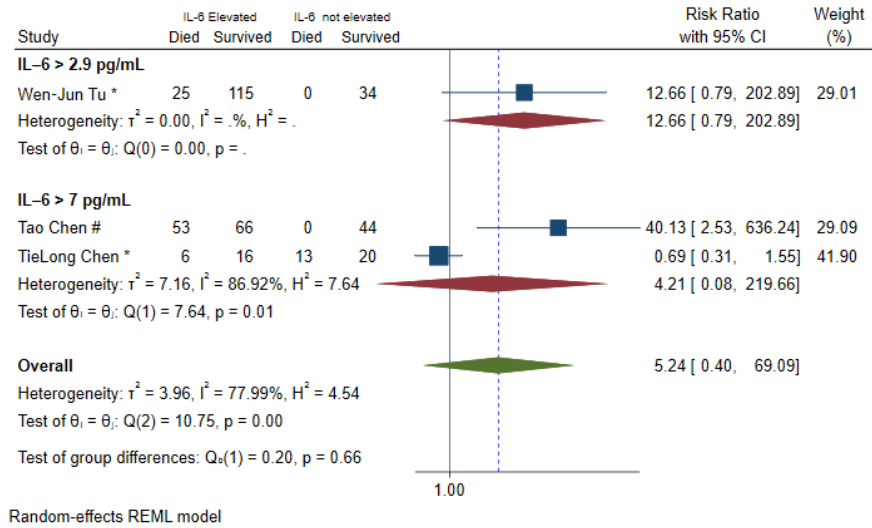

eFigure 63. Pooled Risk ratio of death in patients with Increased NT ProBNP- Forest plot

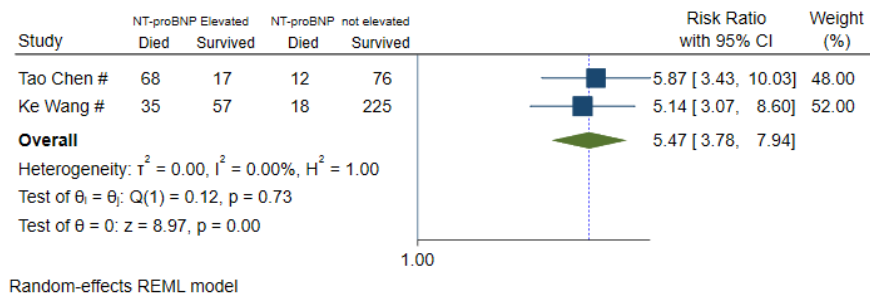

eFigure 64. Pooled Risk ratio of death in patients with Elevated Troponin- Forest plot

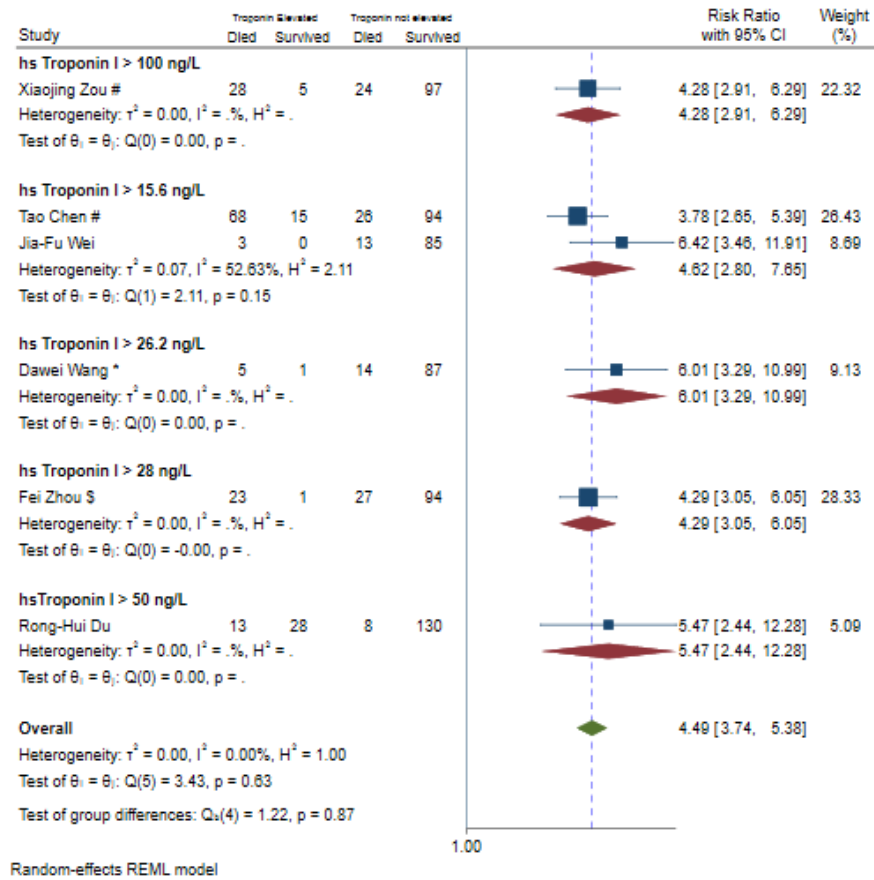

Figure 65. Pooled Risk ratio of death in patients with bilateral lung involvement a) Forest plot b) Funnel Plot.

65a

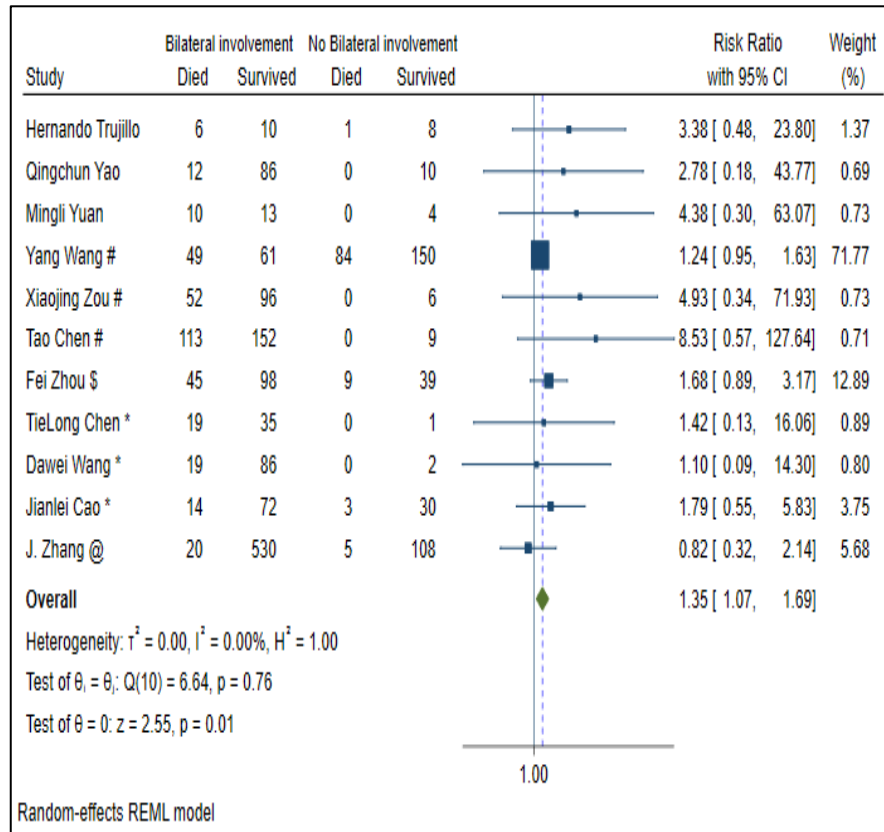

65b

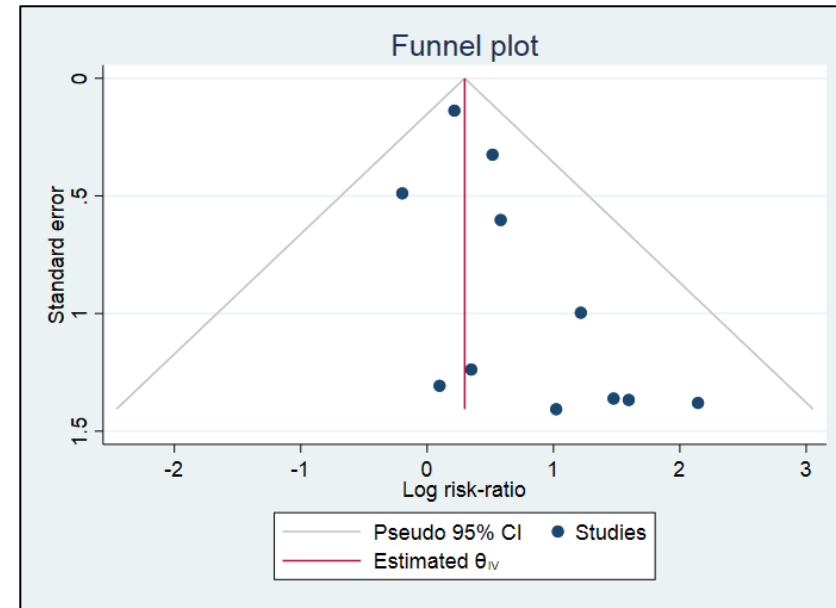

eFigure 66. Pooled Risk ratio of death in patients with consolidation -Forest plot

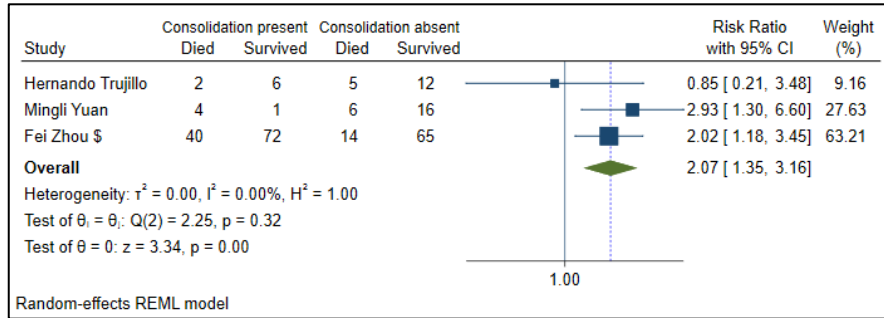

eFigure 67. Pooled Risk ratio of death in patients with ground glass opacity- Forest plot

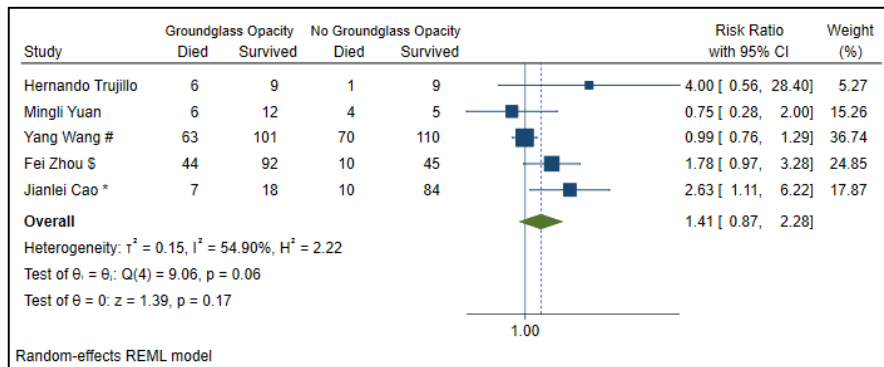



eFigure 68. Pooled Risk ratio of death in patients with unifocal involvement -Forest plot.

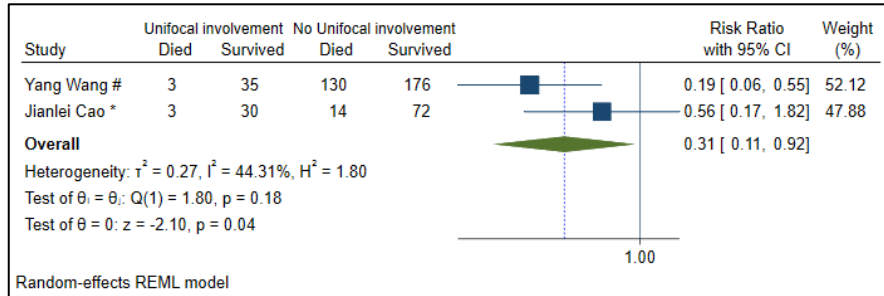

eFigure 69. Pooled Risk ratio of death in patients with pleural effusion- Forest plot

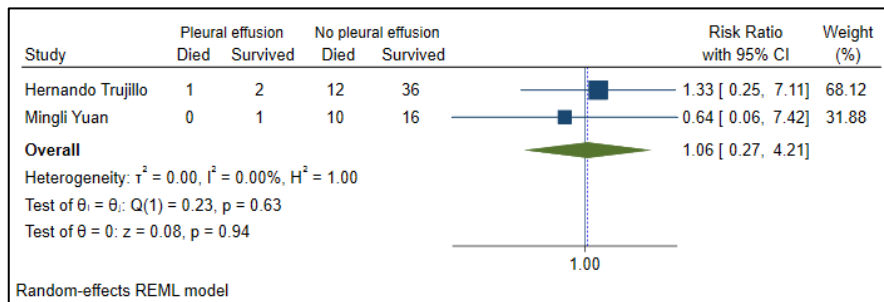

# **Association with Severe disease**

eFigure 70. Pooled Odds ratio of severe disease in patients with male gender. a) Forest plot b) Funnel Plot

70a

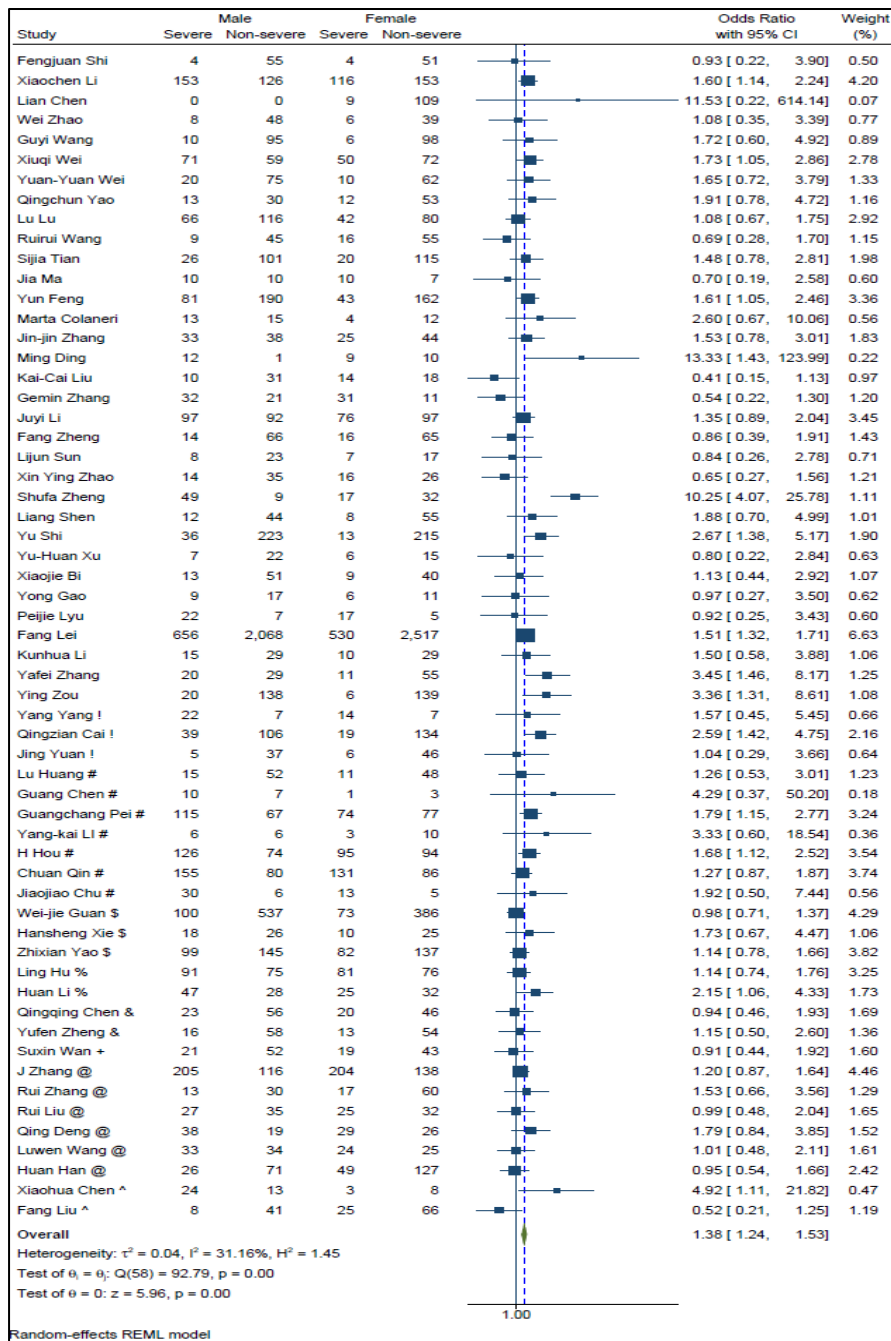

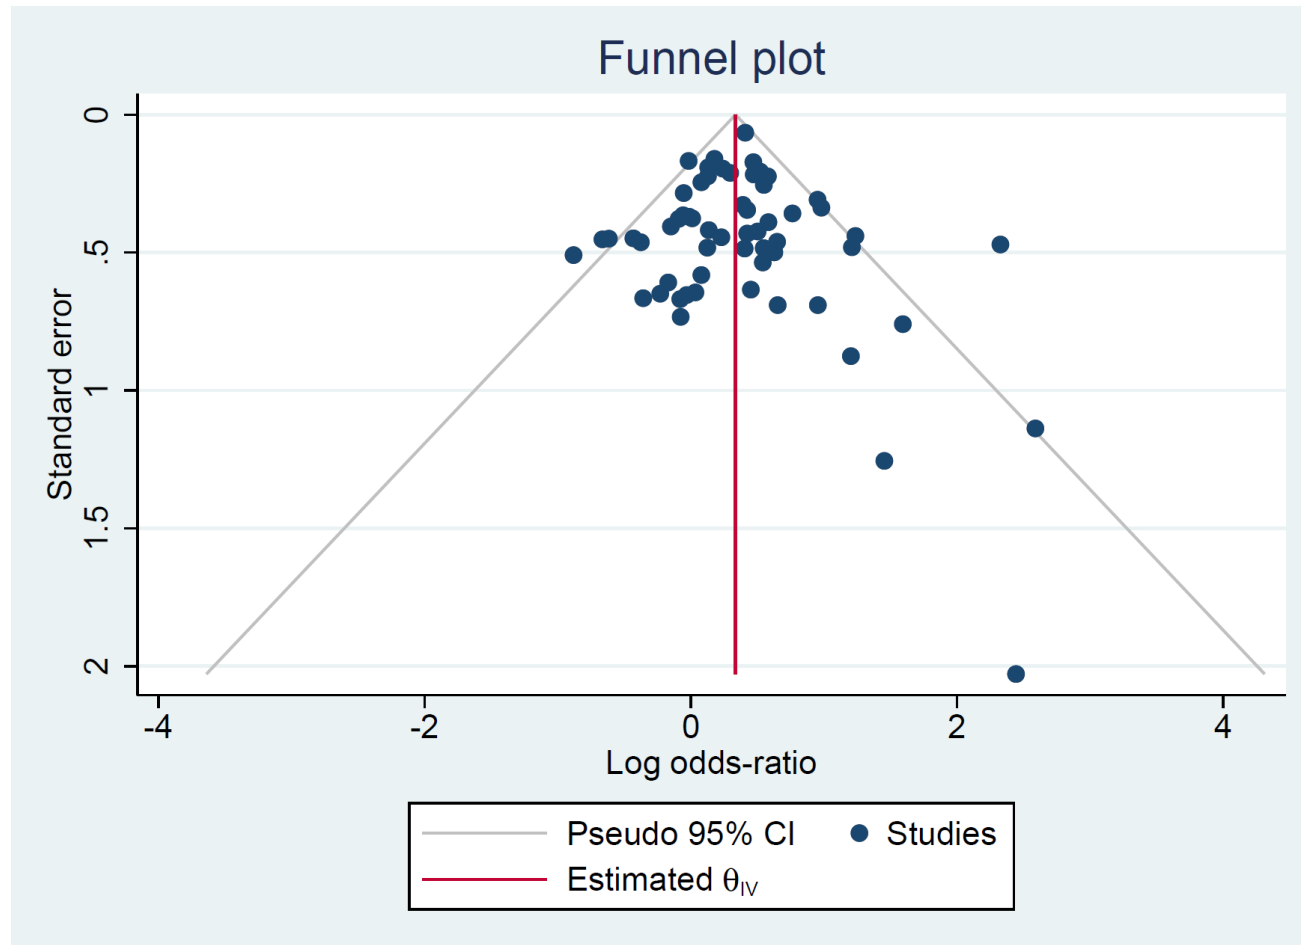

eFigure 71. Pooled Odds ratio of severe disease in patients who was ever smoker. a) Forest plot b) Funnel Plot

71a

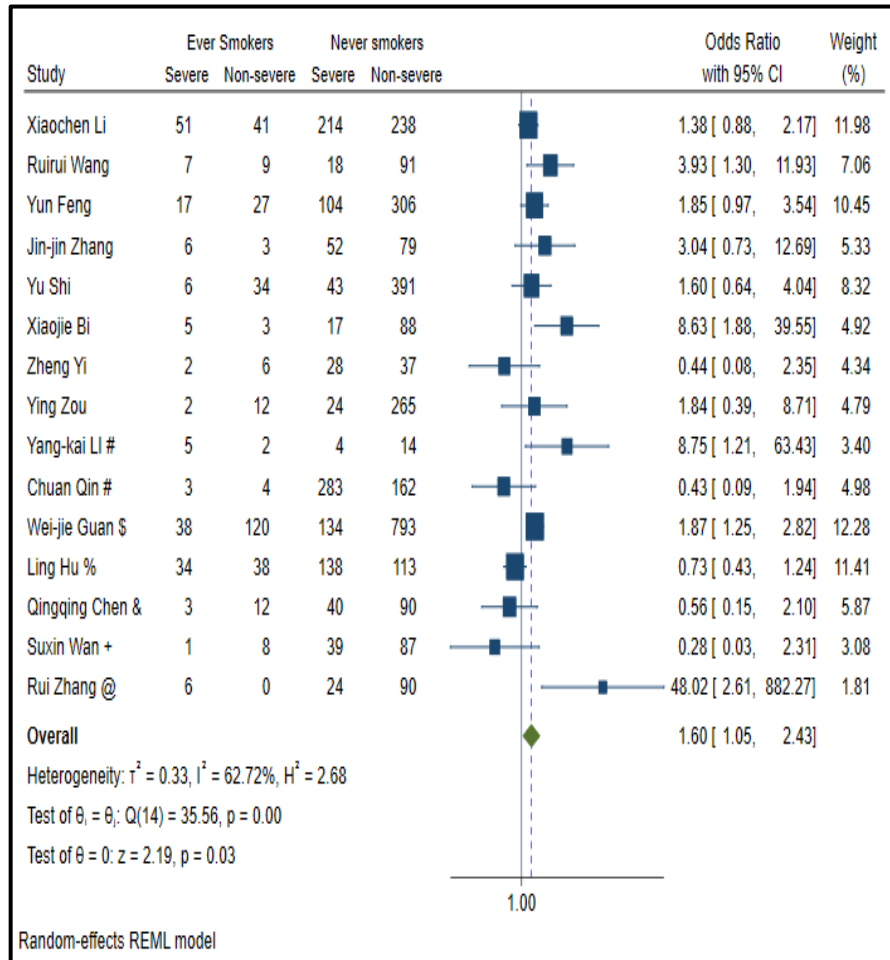

71b

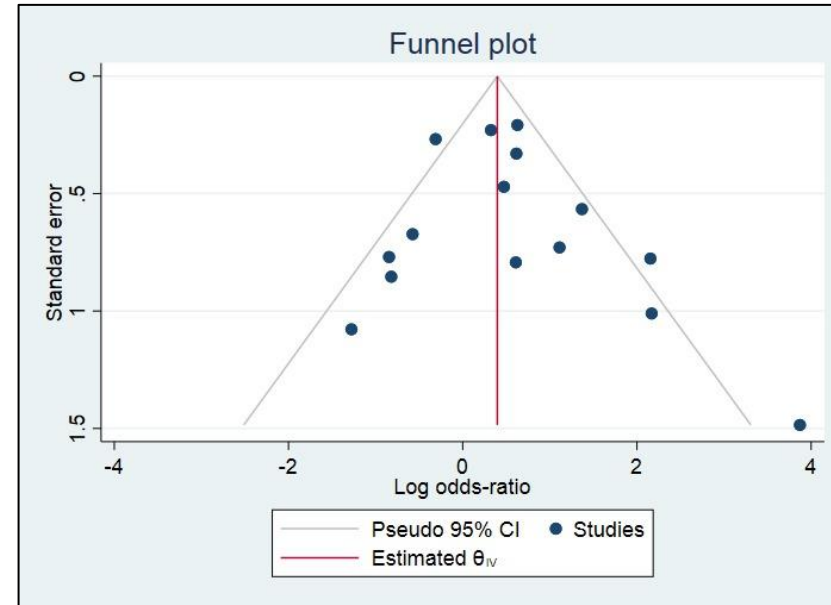

eFigure 72 Pooled Odds ratio of severe disease in patients with diabetes mellitus. a) Forest plot b) Funnel Plot

72a

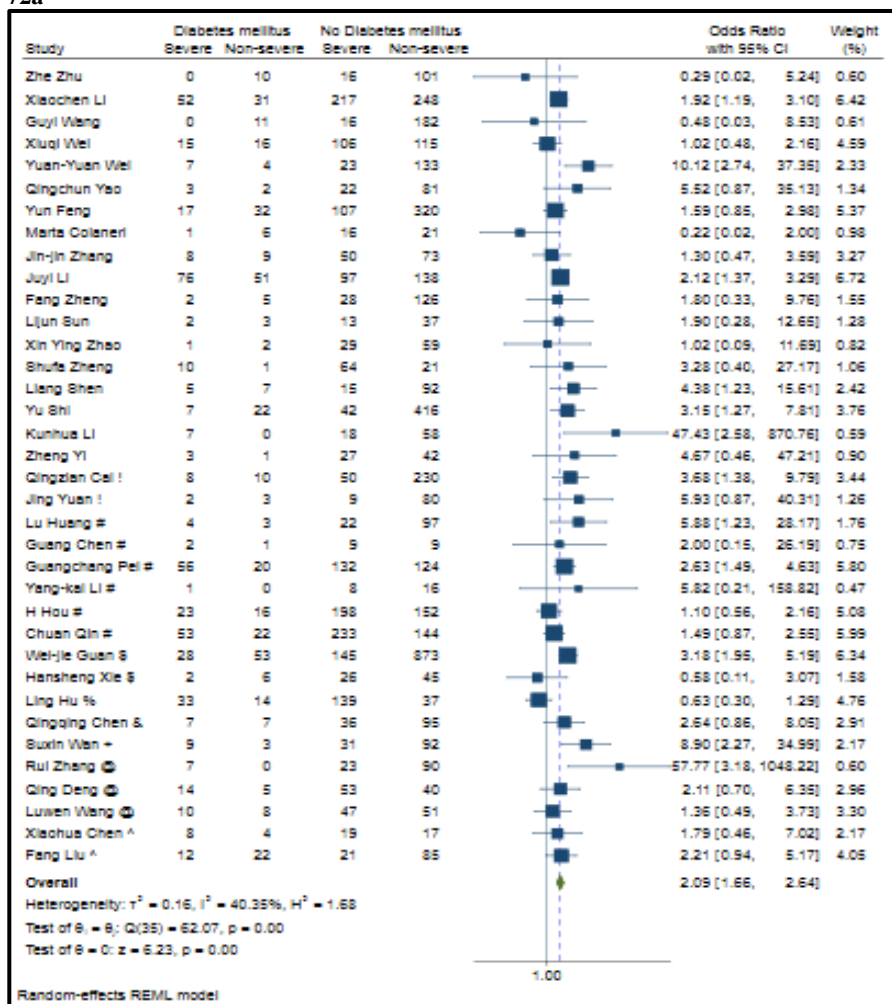

72b

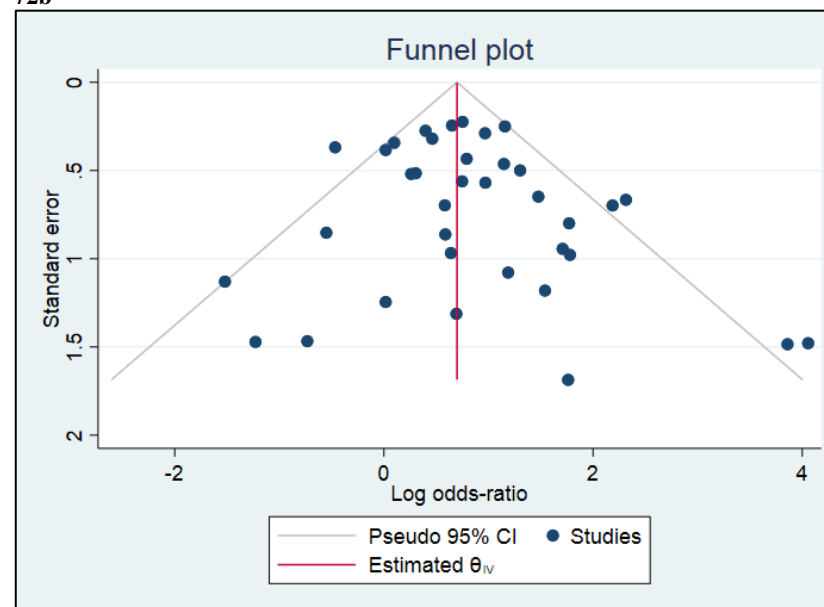

eFigure 73 Pooled Odds ratio of severe disease in patients with hypertension. a) Forest plot b) Funnel Plot

73a

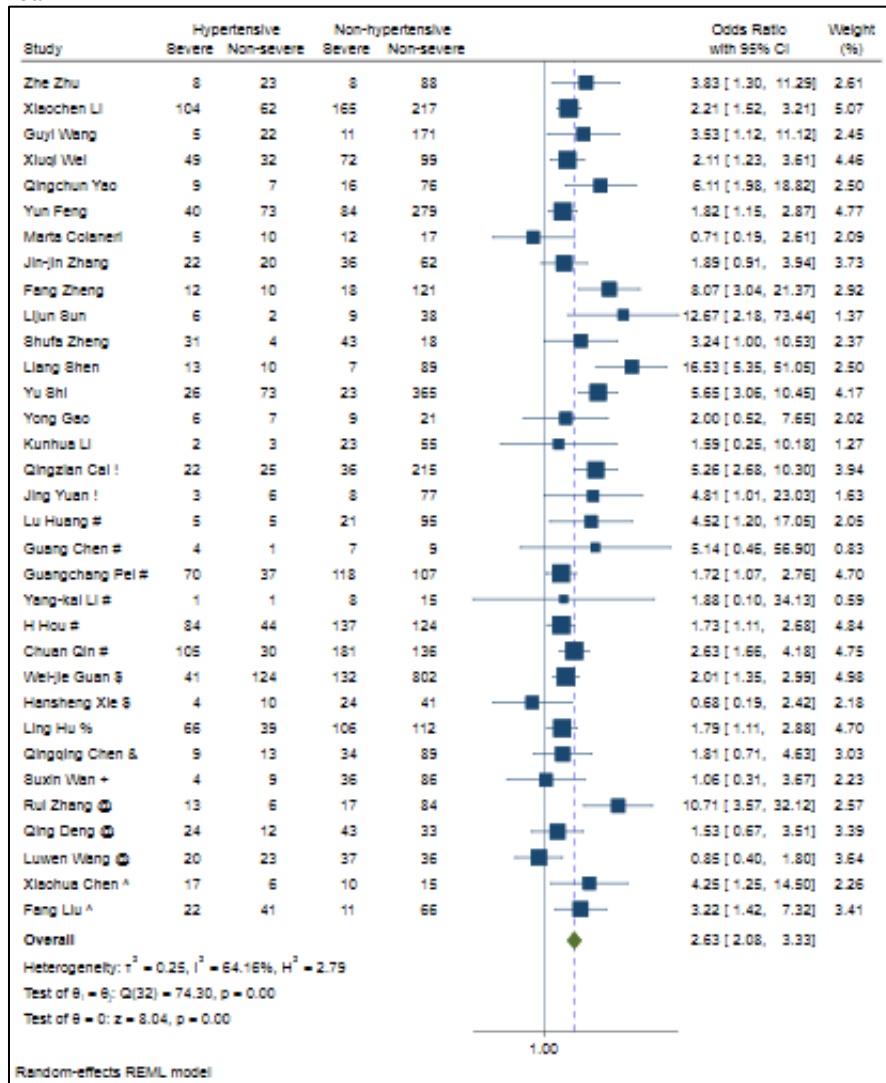

73b

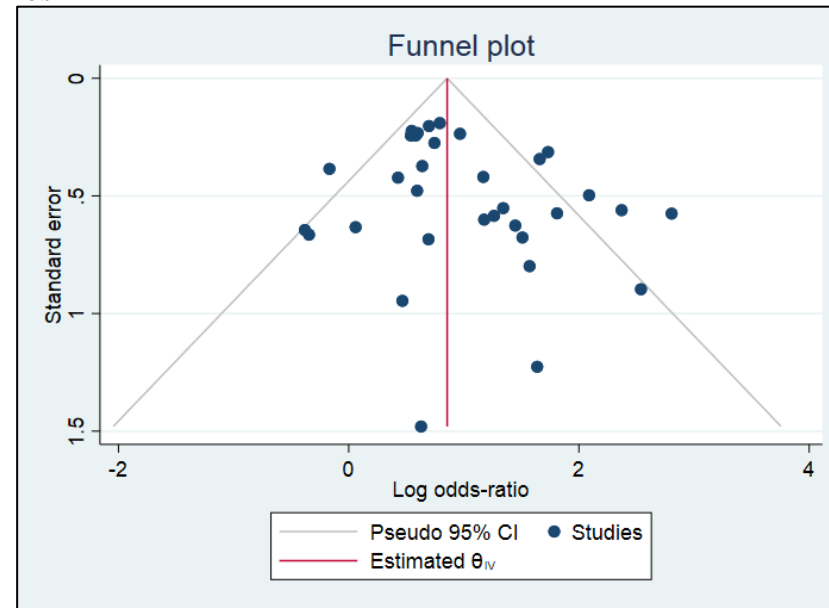

eFigure 74 Pooled Odds ratio of severe disease in patients with Cardiovascular diseases a) Forest plot b) Funnel Plot

74a

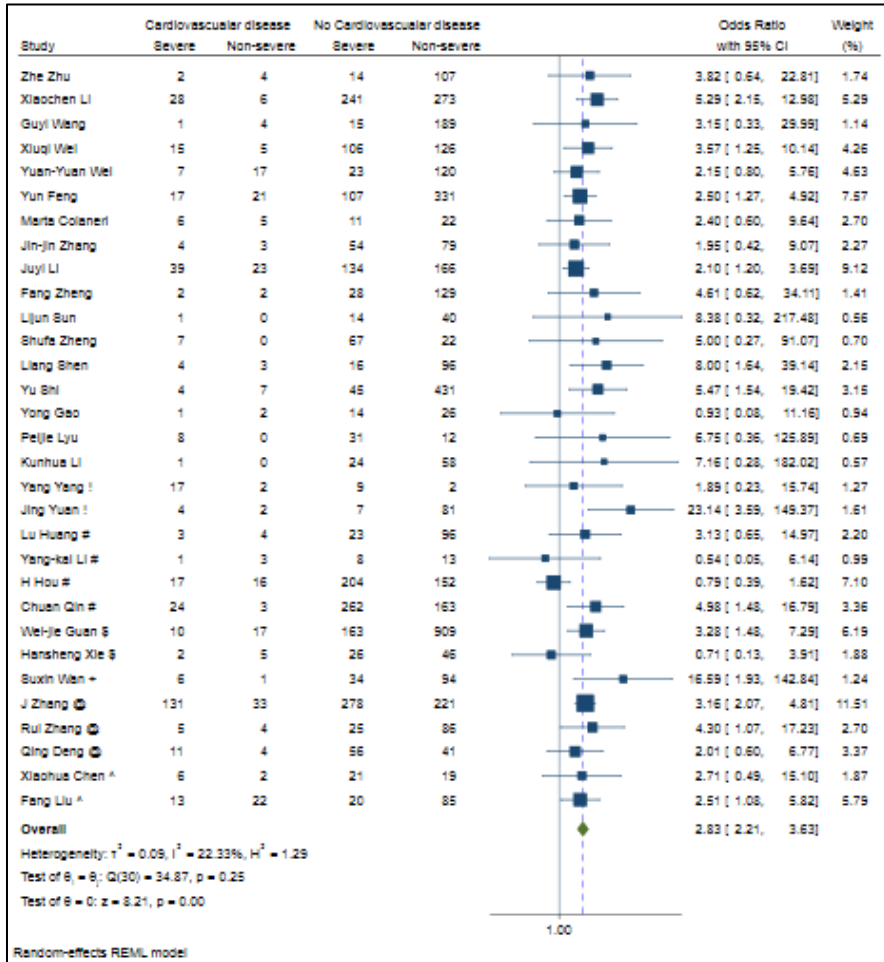

74b

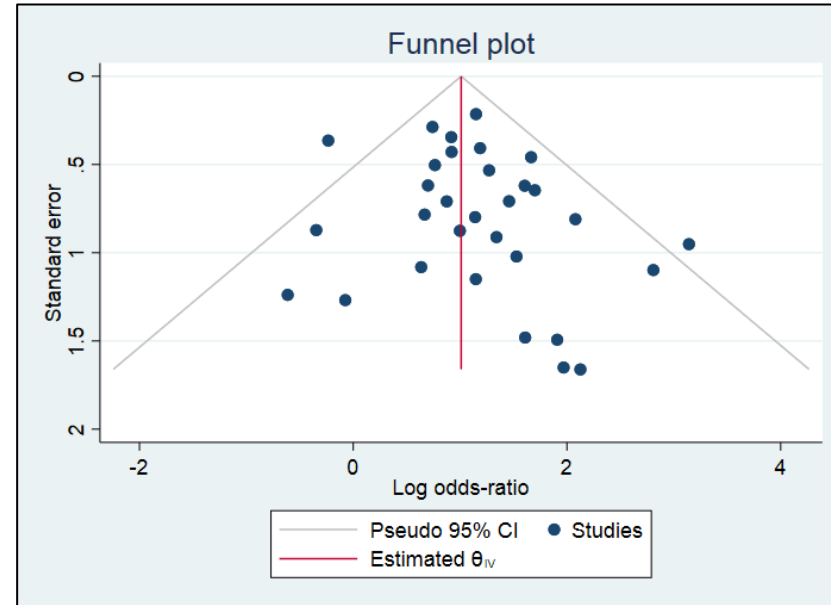



eFigure 75 Pooled Odds ratio of severe disease in patients with Congestive Heart Failure- Forest plot

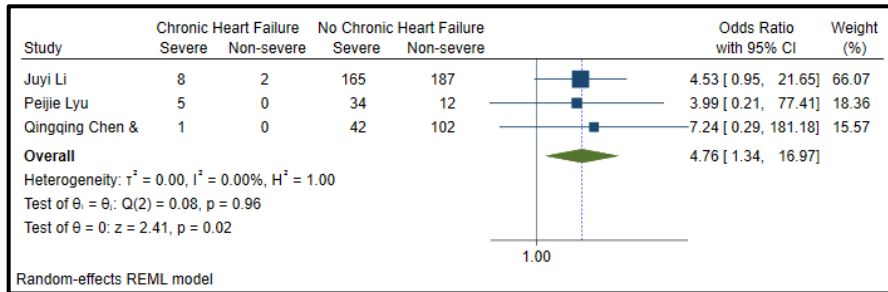

eFigure 76 Pooled Odds ratio of severe disease in patients with Cerebrovascular Disease a) Forest plot b) Funnel Plot

76a

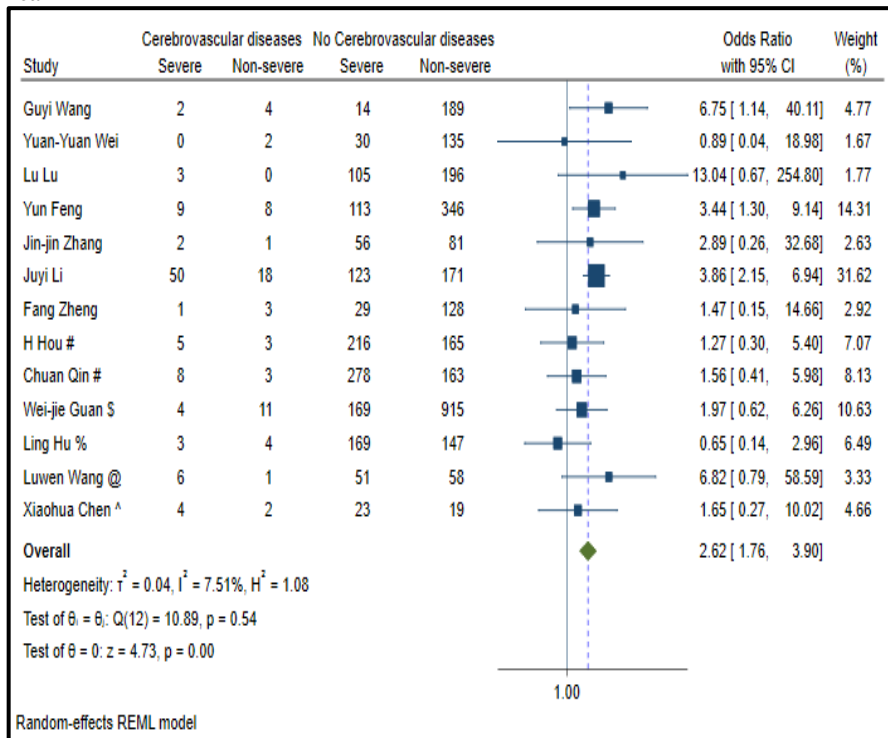

76b

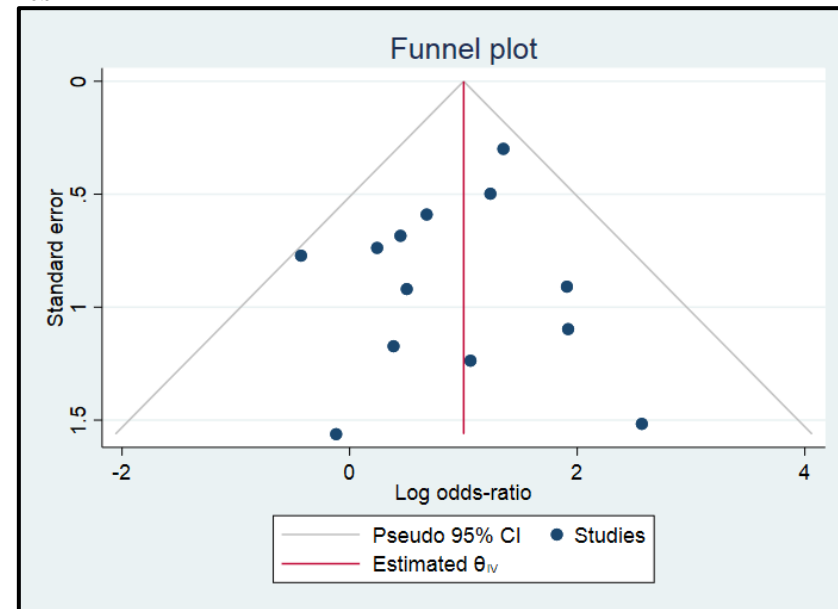

eFigure 77 Pooled Odds ratio of severe disease in patients with Chronic Obstructive pulmonary disease a) Forest plot b) Funnel Plot

77a

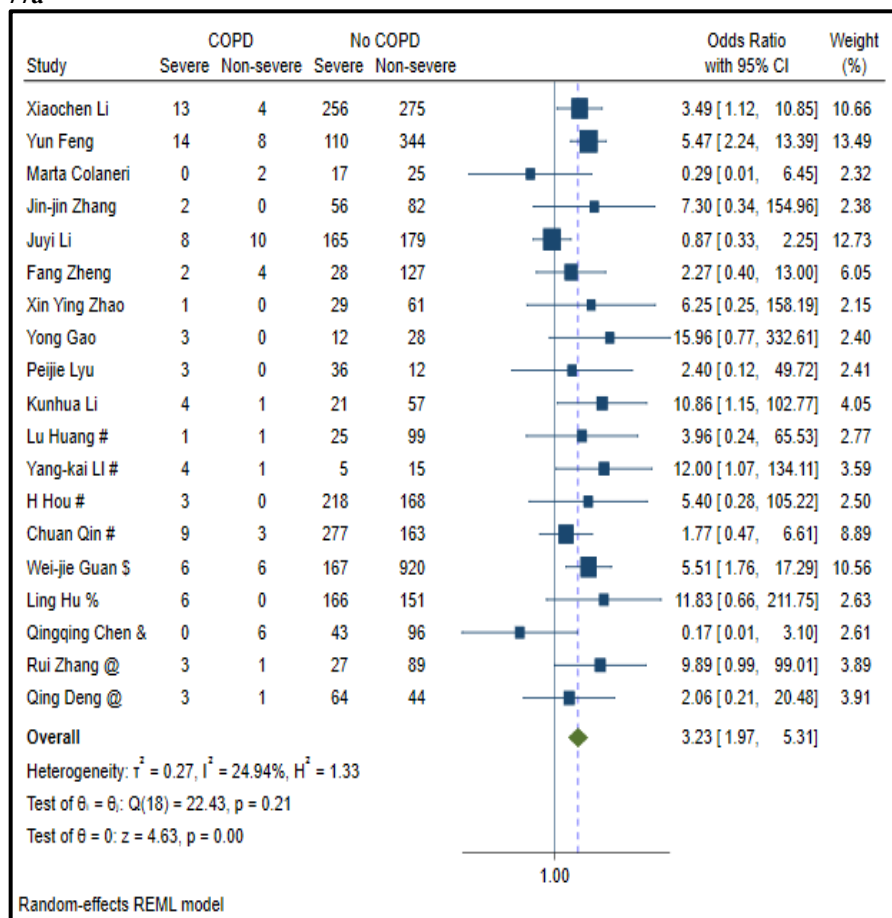

77b

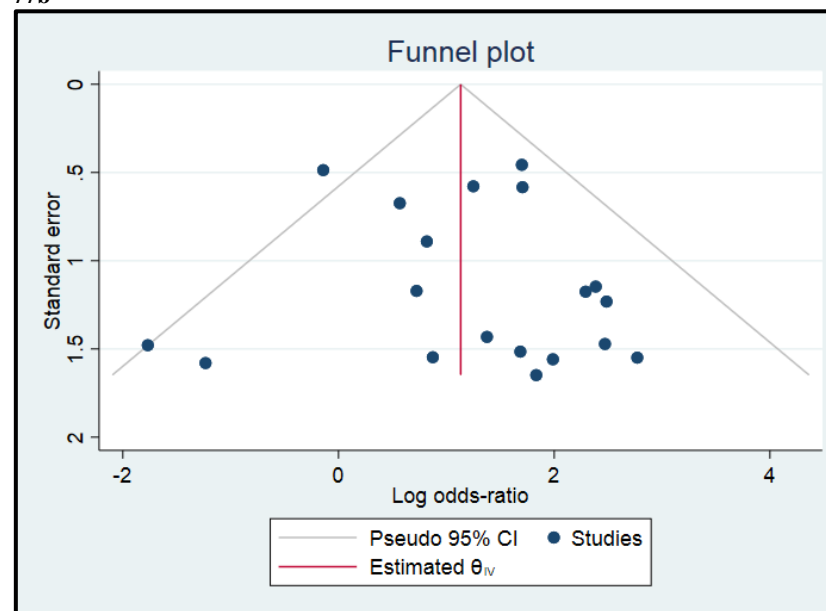

eFigure 78 Pooled Odds ratio of severe disease in patients with chronic kidney disease a) Forest plot b) Funnel Plot

78a

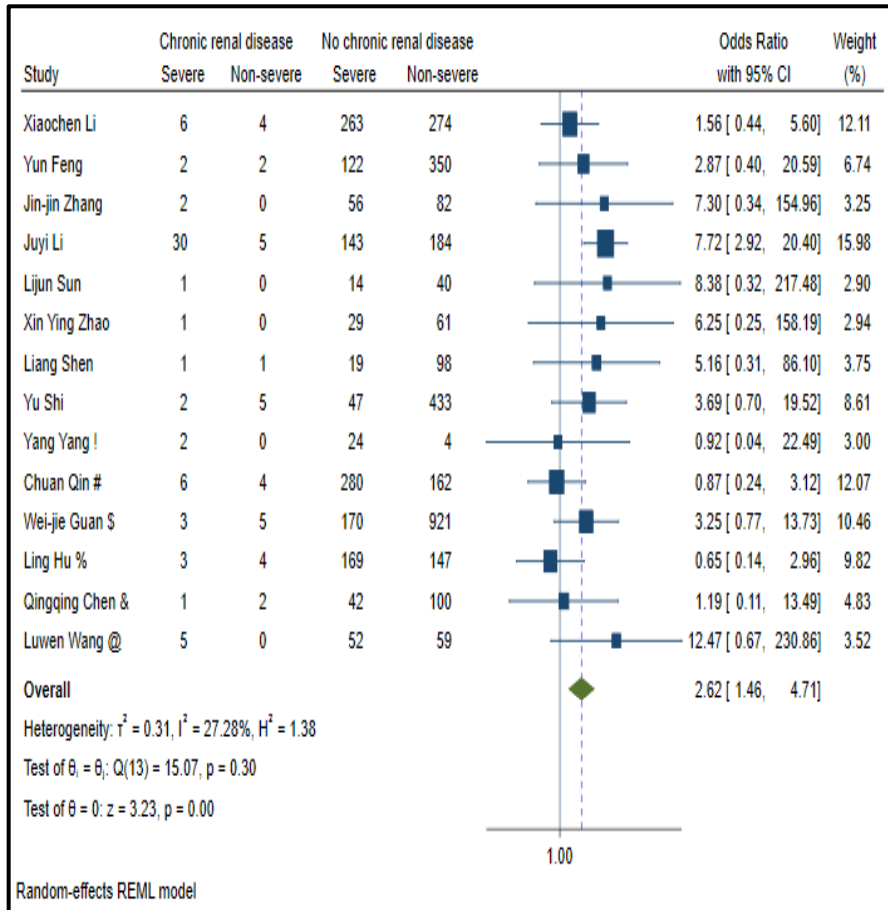

78b

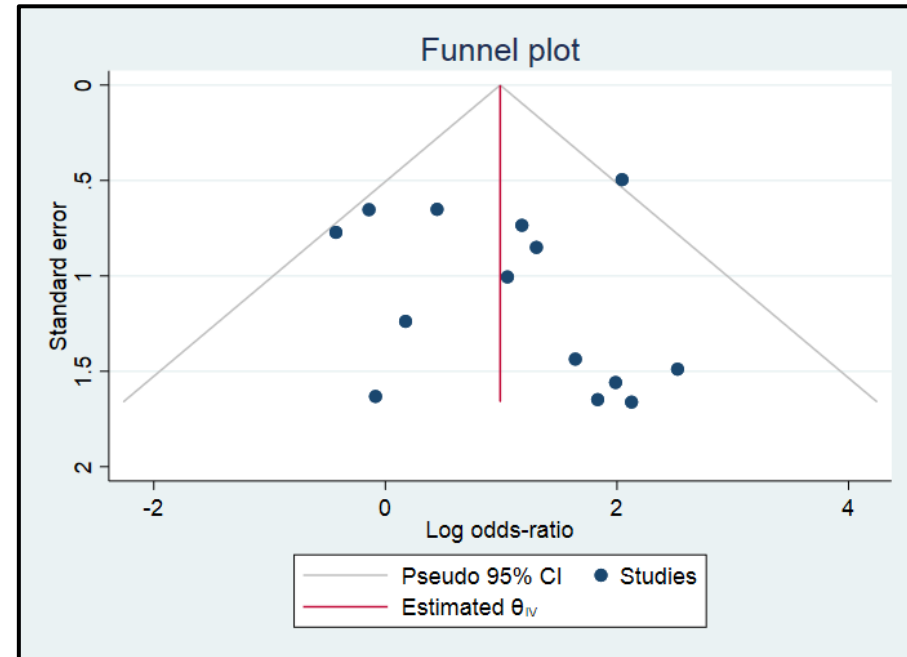

eFigure 79 Pooled Odds ratio of severe disease in patients with liver dysfunction a) Forest plot b) Funnel Plot

79a

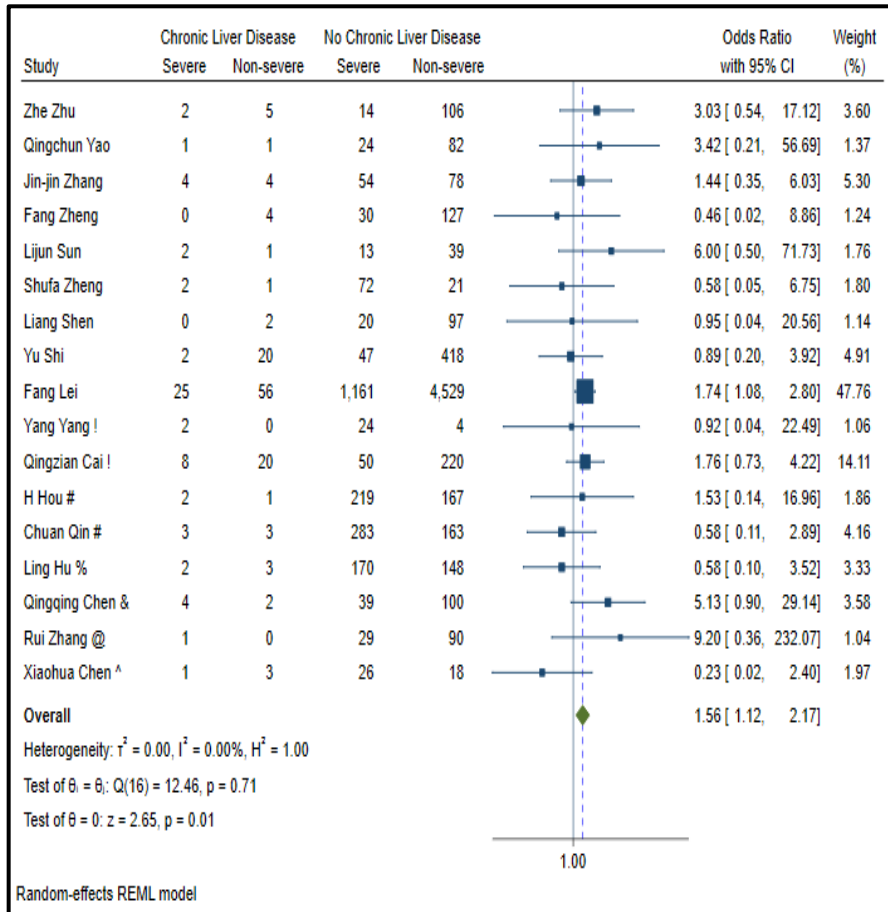

79b

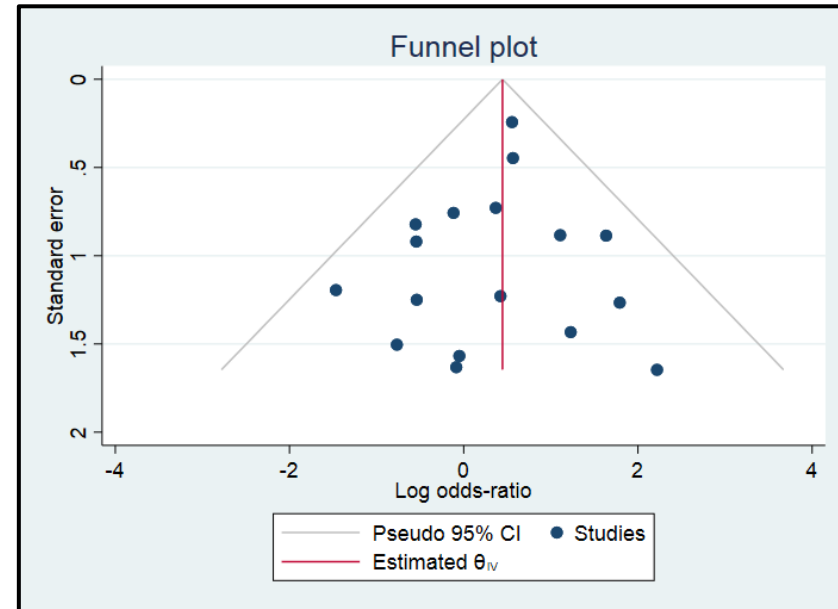

eFigure 80 Pooled Odds ratio of severe disease in patients with Hepatitis B infection - Forest plot

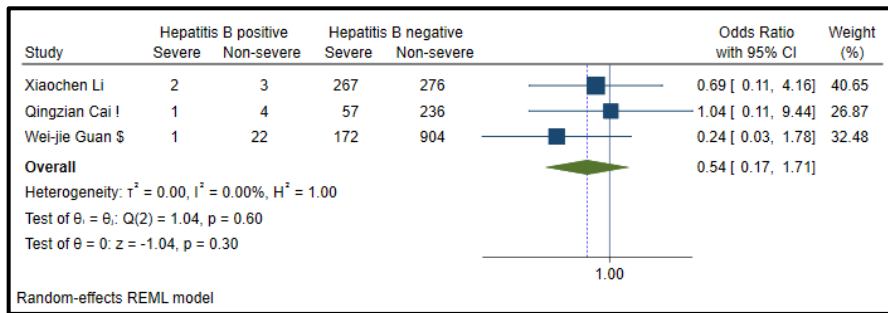

eFigure 81 Pooled Odds ratio of severe disease in patients with malignancy a) Forest plot b) Funnel Plot

81a

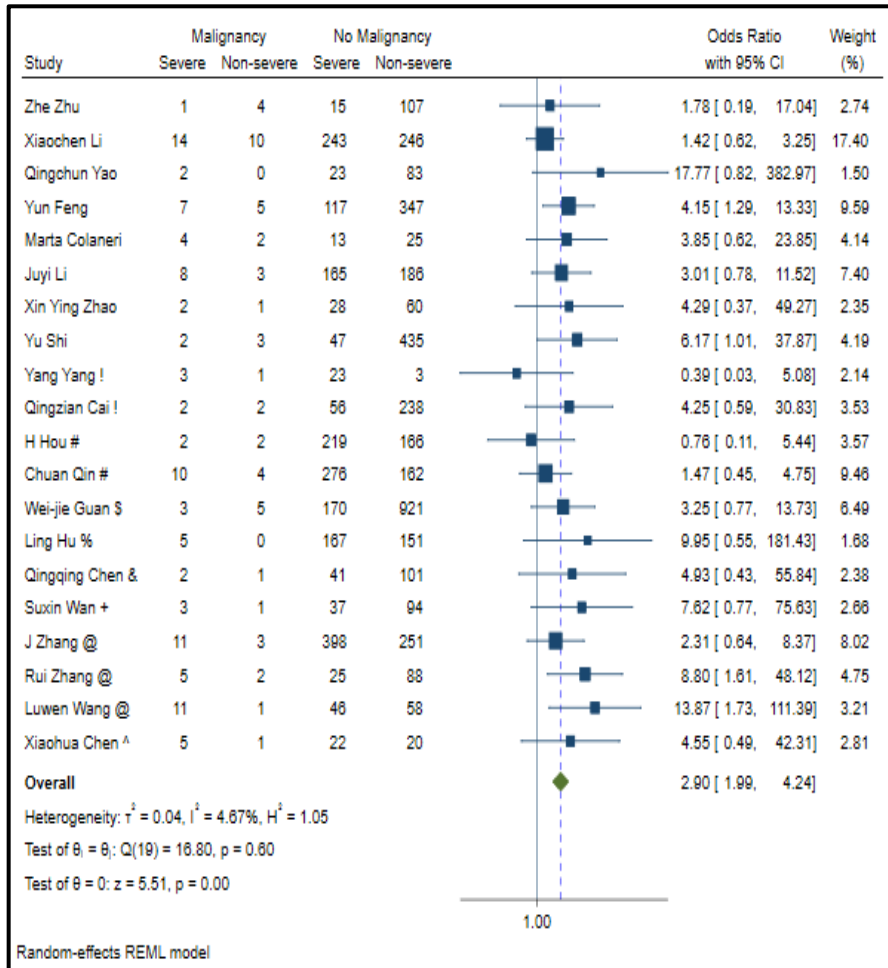

81b

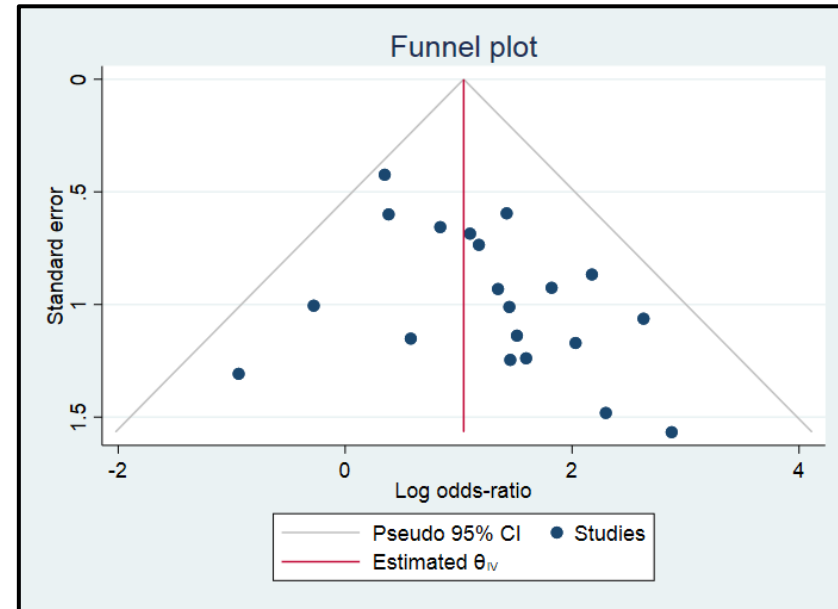

eFigure 82 Pooled Odds ratio of severe disease in patients with HIV- Forest plot

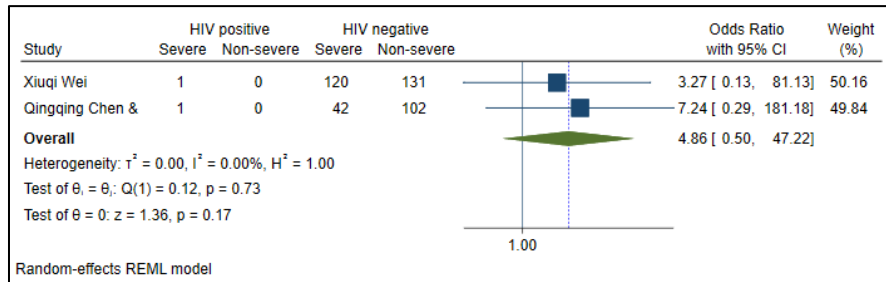

eFigure 83 Pooled Odds ratio of severe disease in patients with immunodeficiency- Forest plot

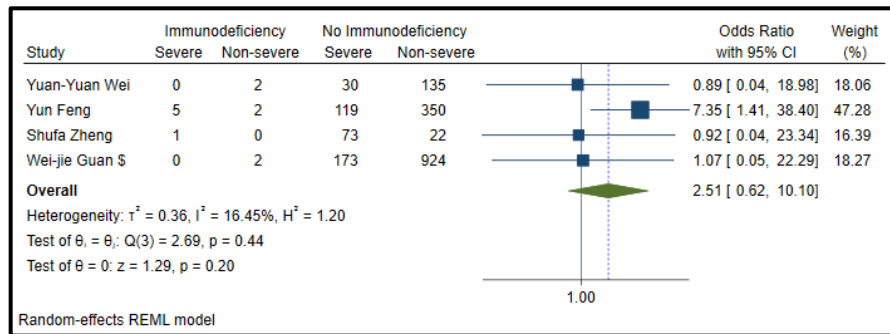



eFigure 84 Pooled Odds ratio of severe disease in patients with other endocrine diseases -Forest plot

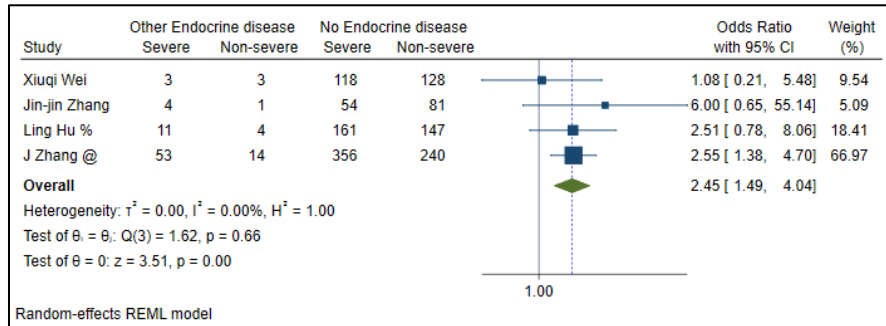

eFigure 85 Pooled Odds ratio of severe disease in patients with fever a) Forest plot b) Funnel Plot

85a

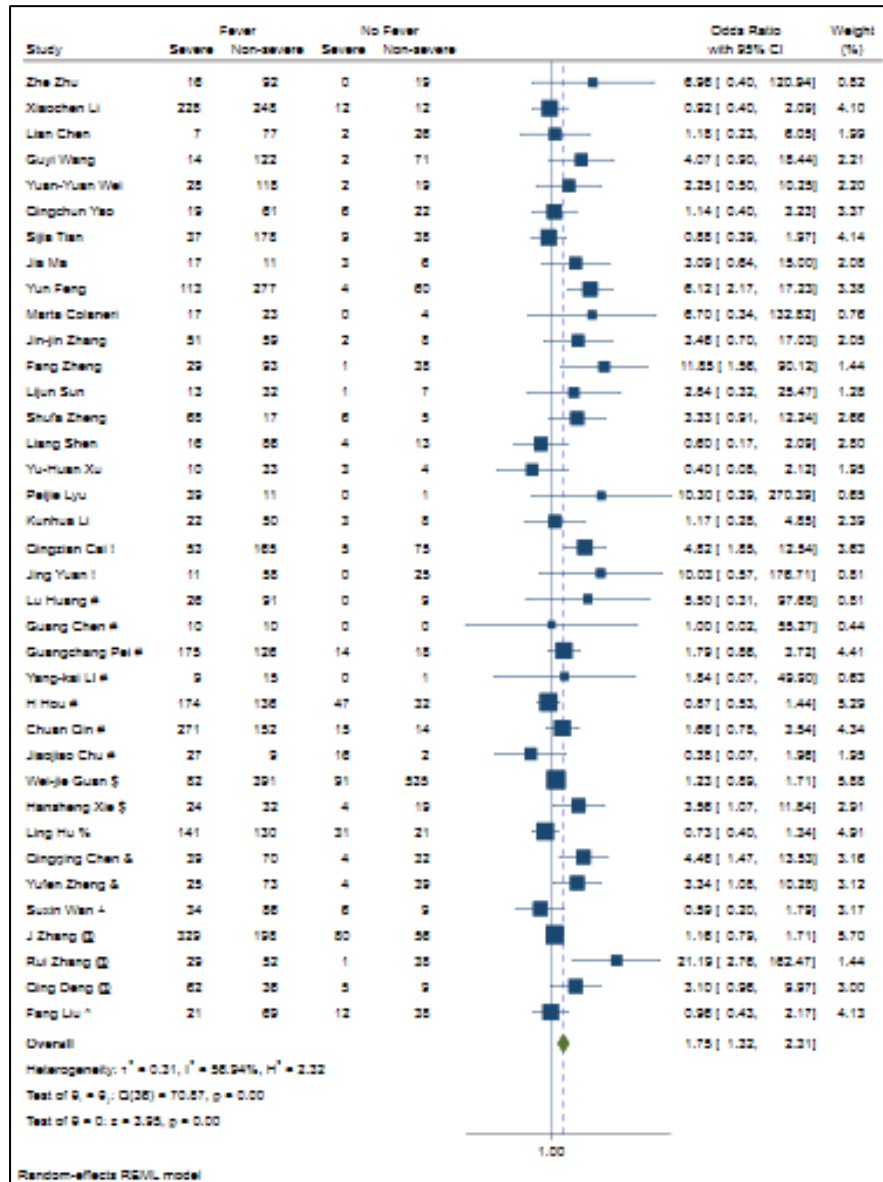

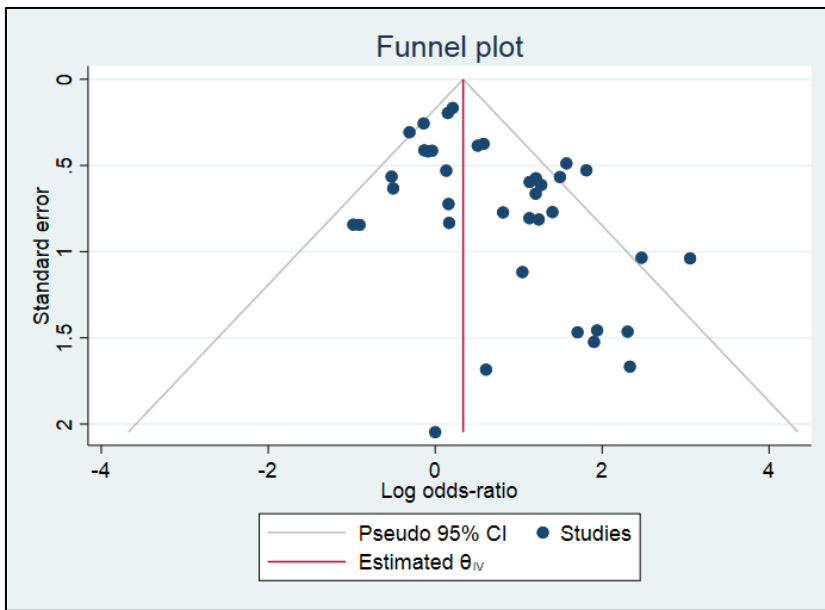

eFigure 86 Pooled Odds ratio of severe disease in patients with sore throat a) Forest plot b) Funnel Plot

86a

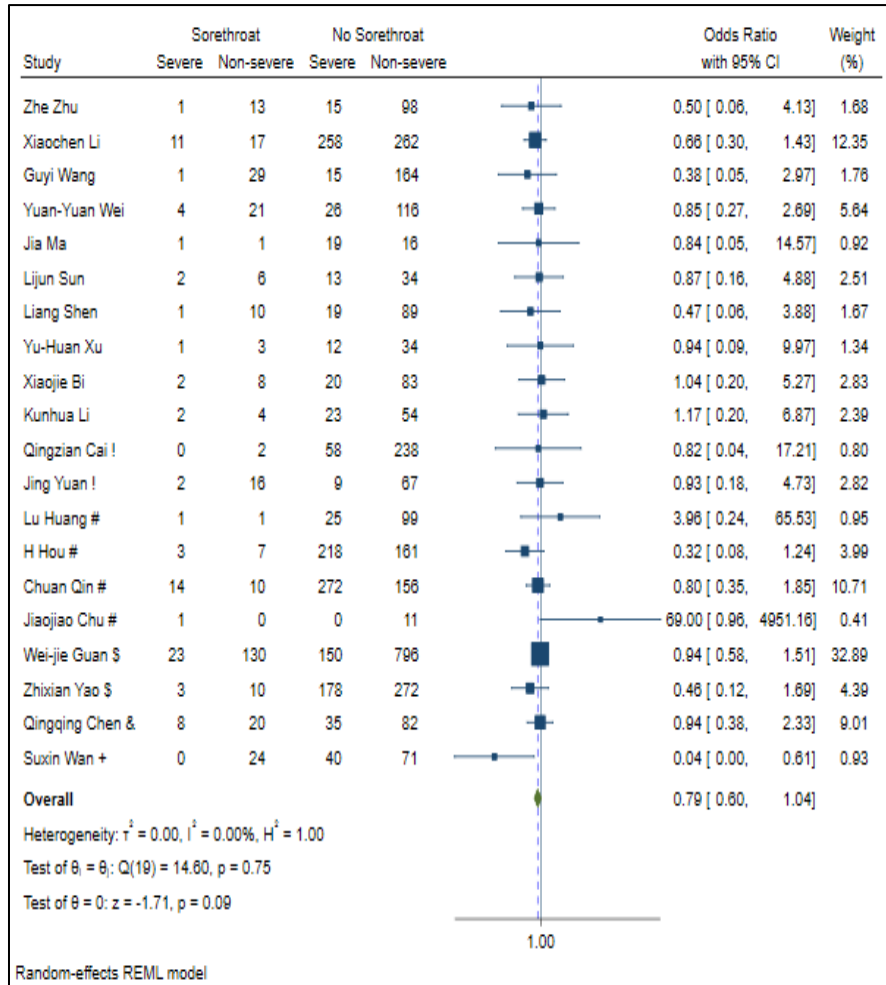

86b

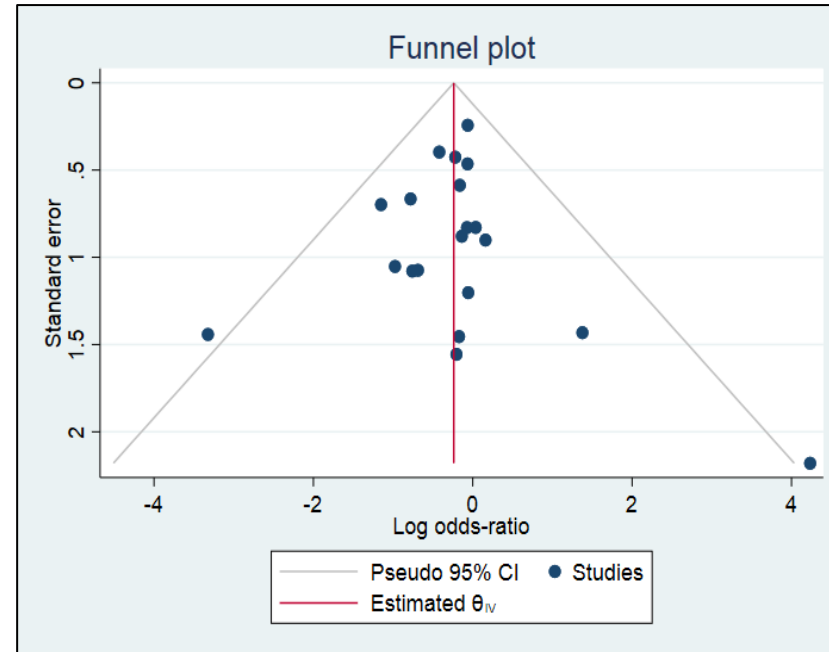

eFigure 87 Pooled Odds ratio of severe disease in patients with cough a) Forest plot b) Funnel Plot

87a

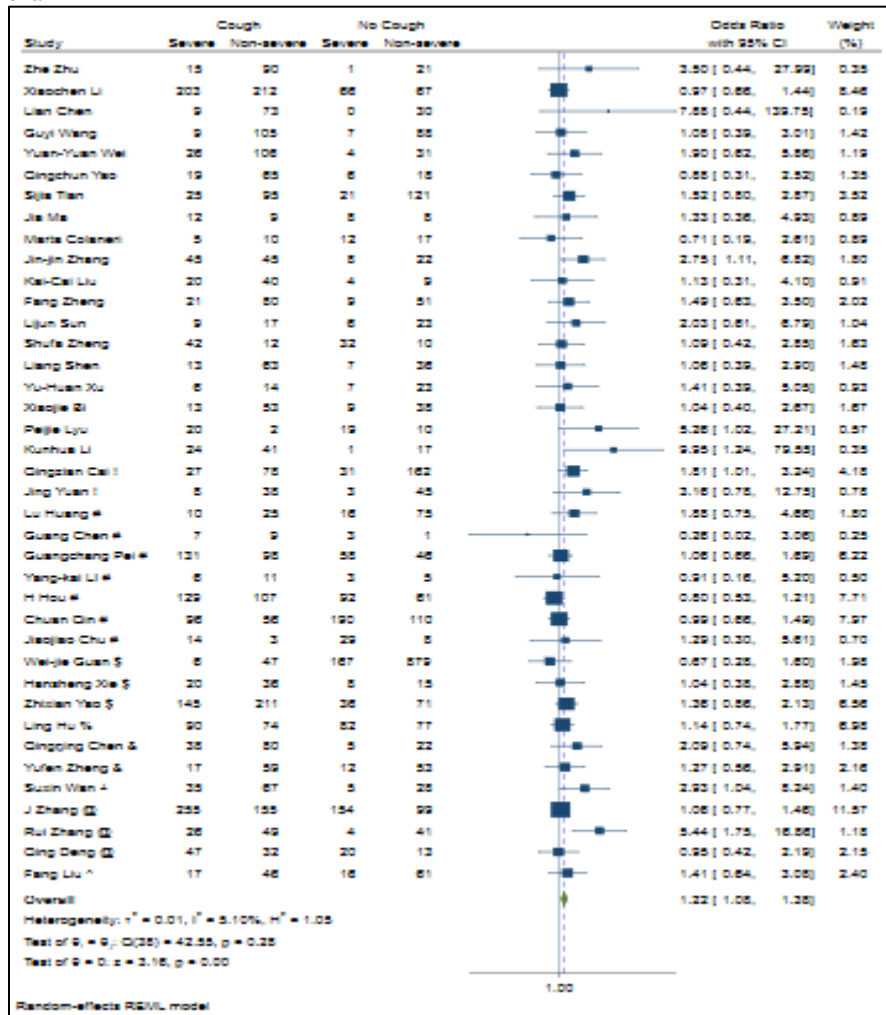

87b

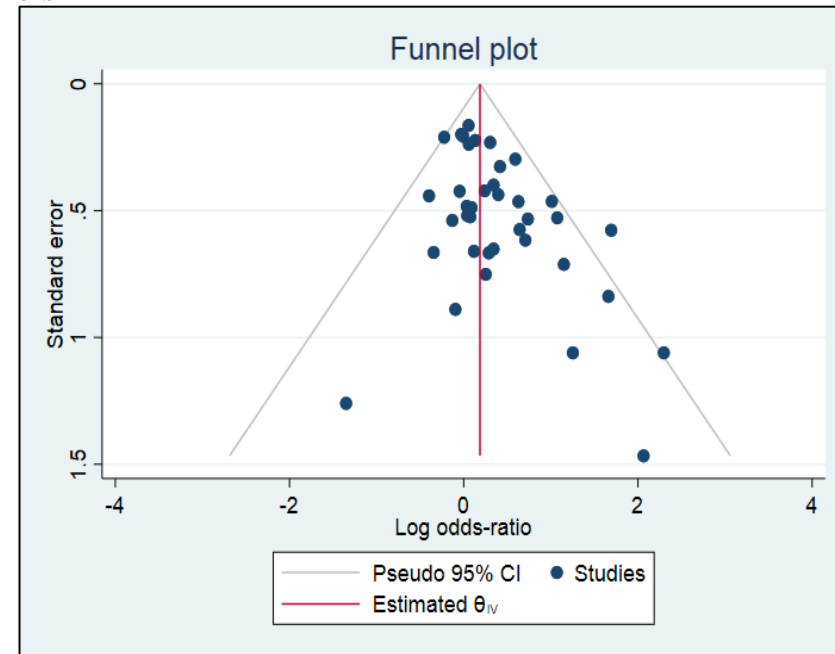

eFigure 88 Pooled Odds ratio of severe disease in patients with expectation a) Forest plot b) Funnel Plot

88a

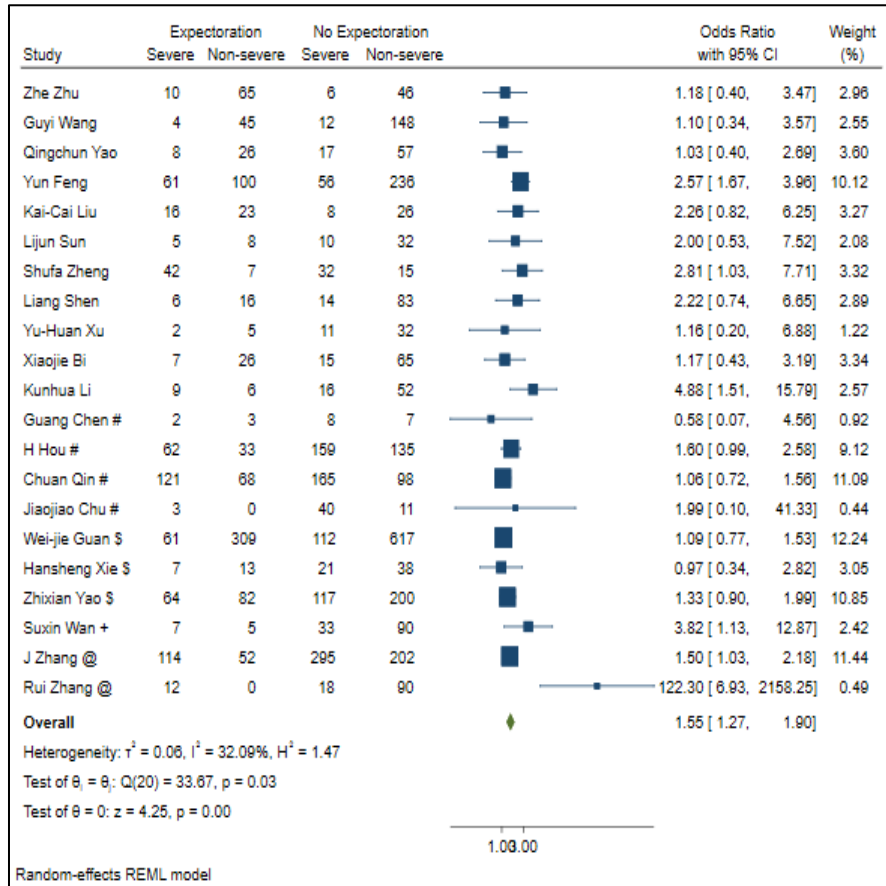

88b

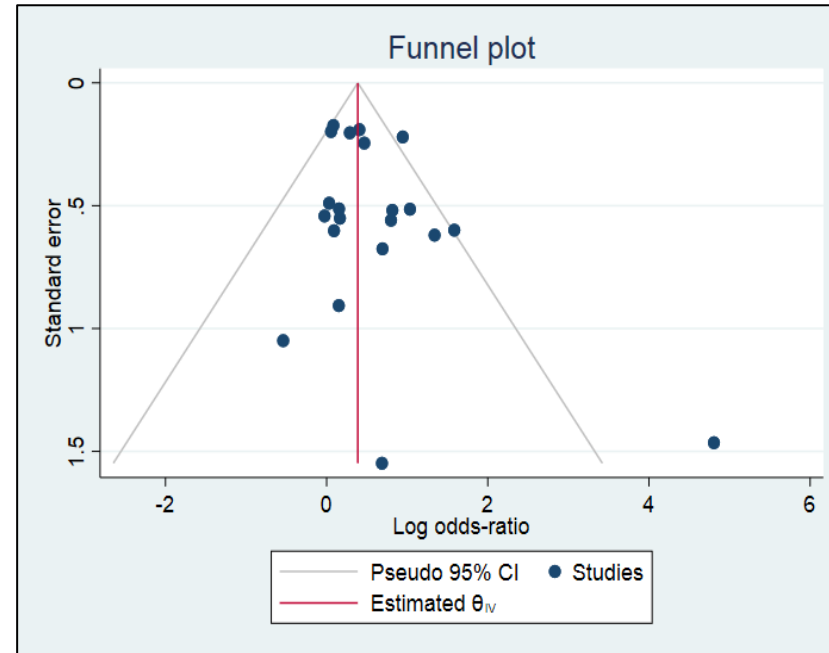

eFigure 89 Pooled Odds ratio of severe disease in patients with vomiting- Forest plot

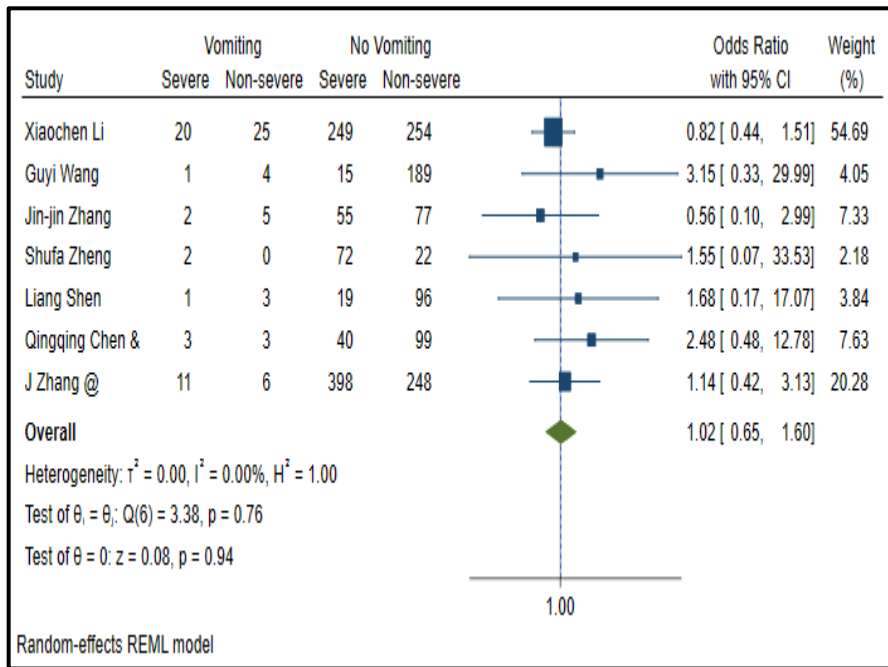

eFigure 90 Pooled Odds ratio of severe disease in patients with diarrhea a) Forest plot b) Funnel Plot

90a

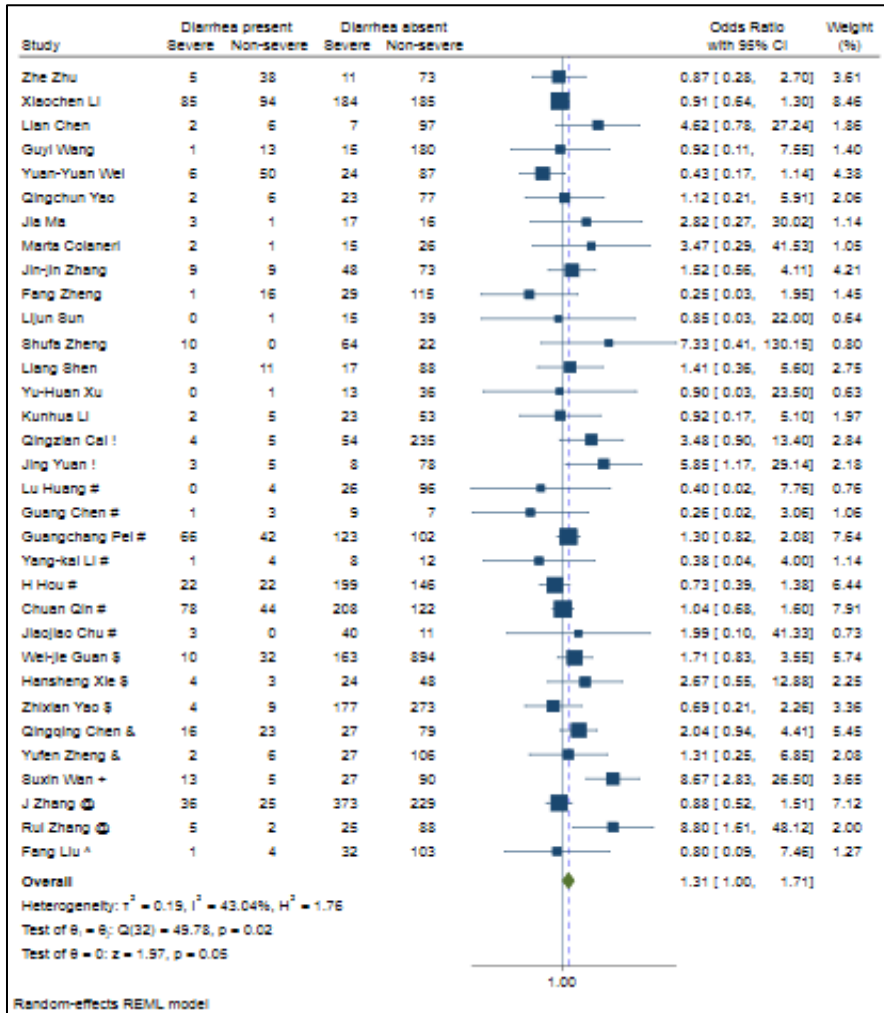

90b

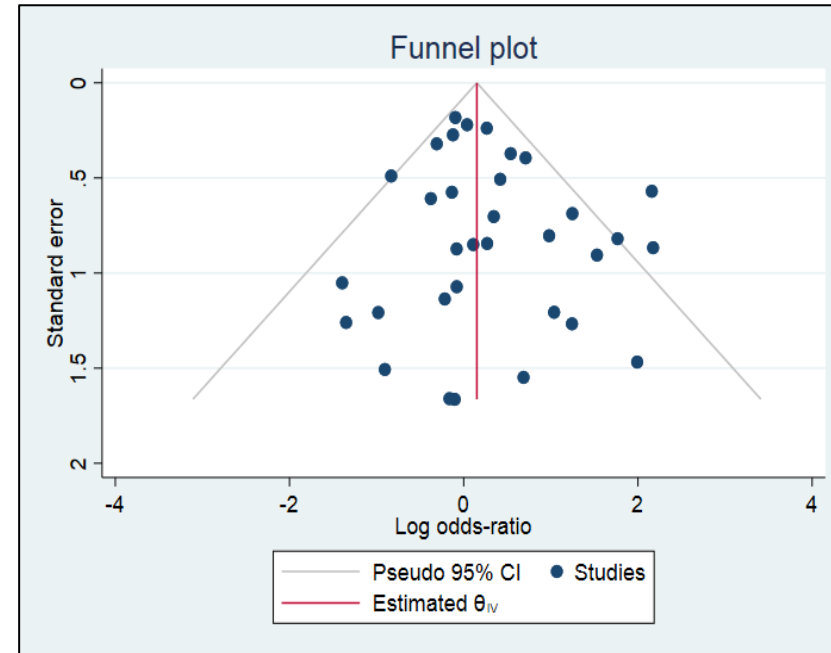



eFigure 91 Pooled Odds ratio of severe disease in patients with nausea a) Forest plot b) Funnel Plot

91a

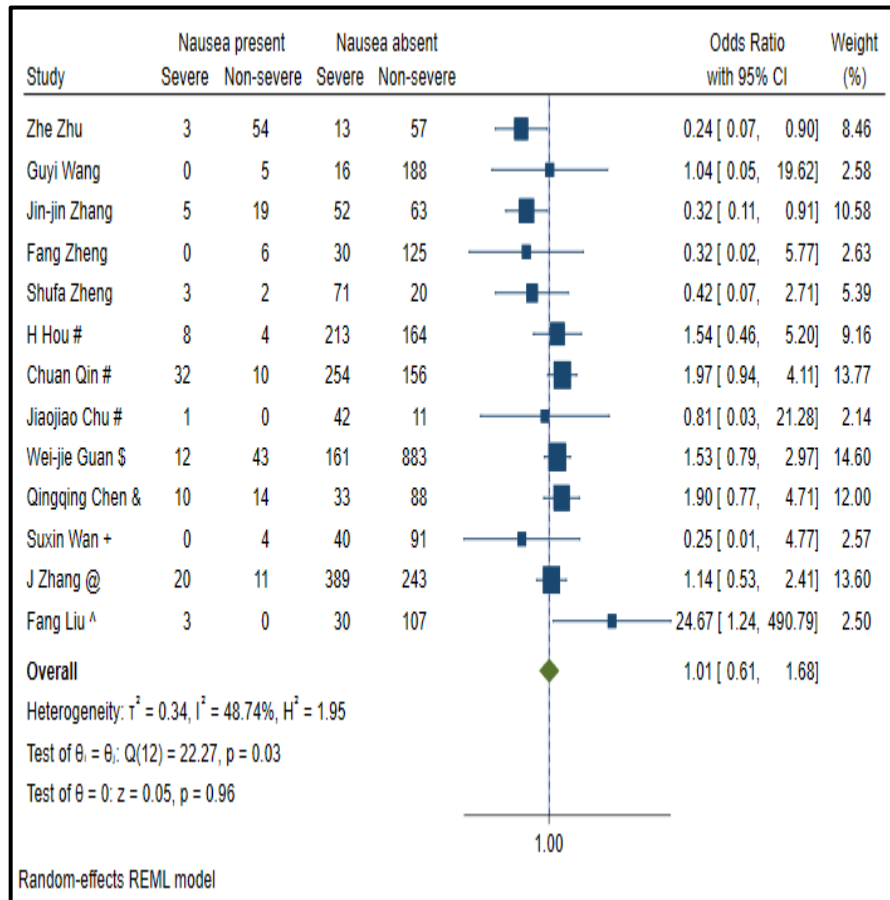

91b

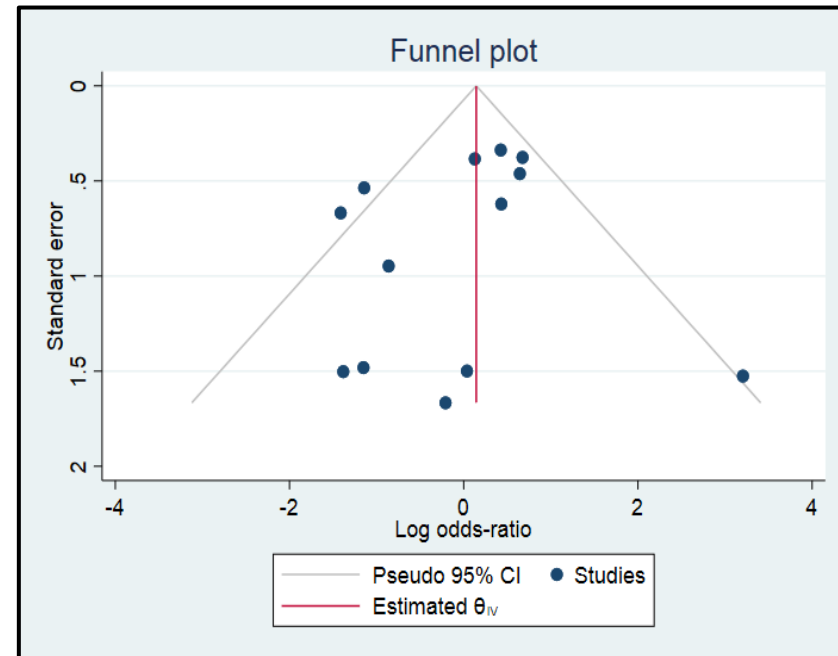

eFigure 92 Pooled Odds ratio of severe disease in patients with myalgia a) Forest plot b) Funnel Plot

92a

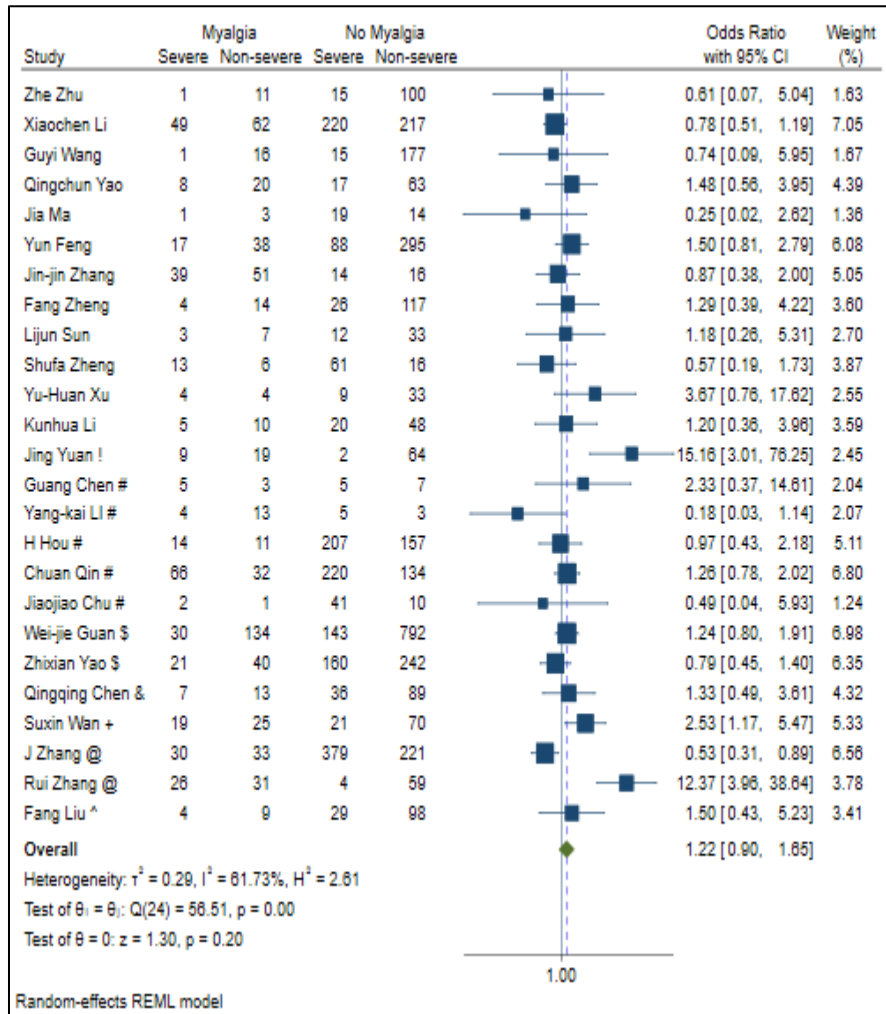

92b

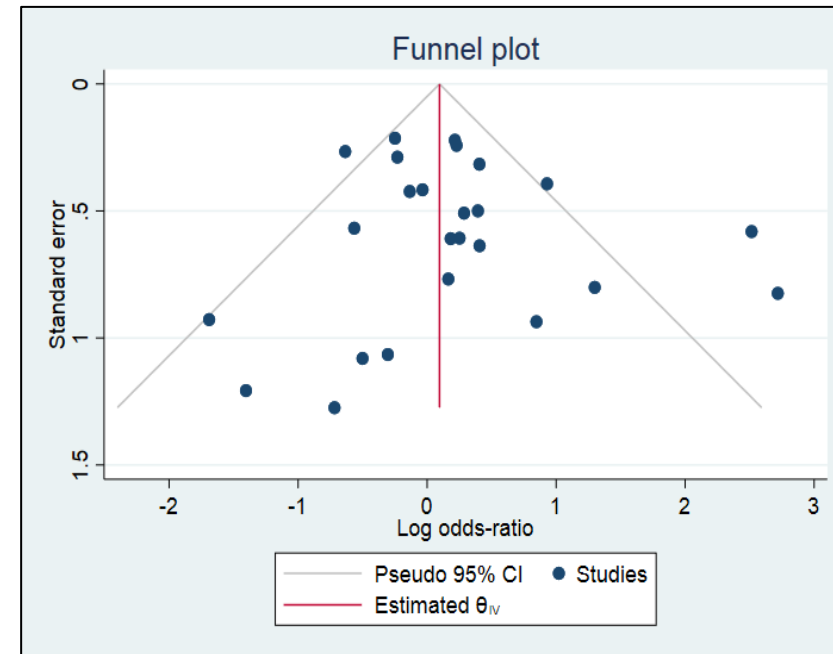

eFigure 93 Pooled Odds ratio of severe disease in patients with headache a) Forest plot b) Funnel Plot

93a

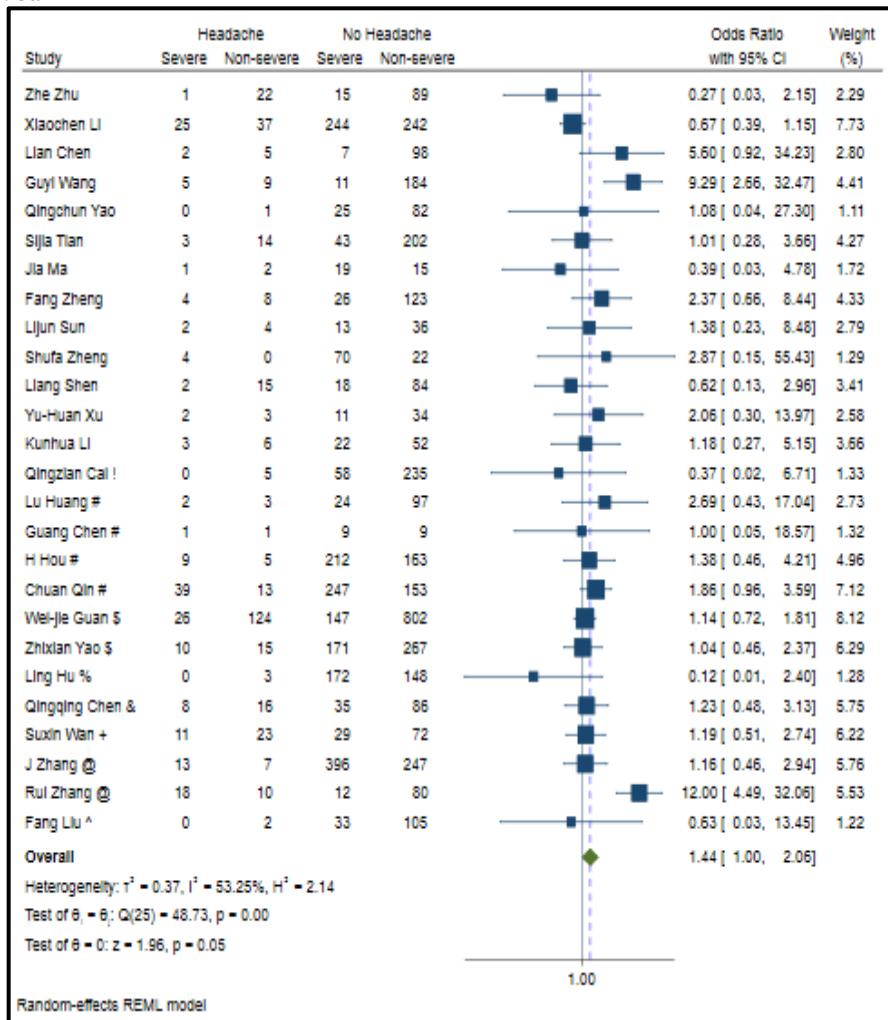

93b

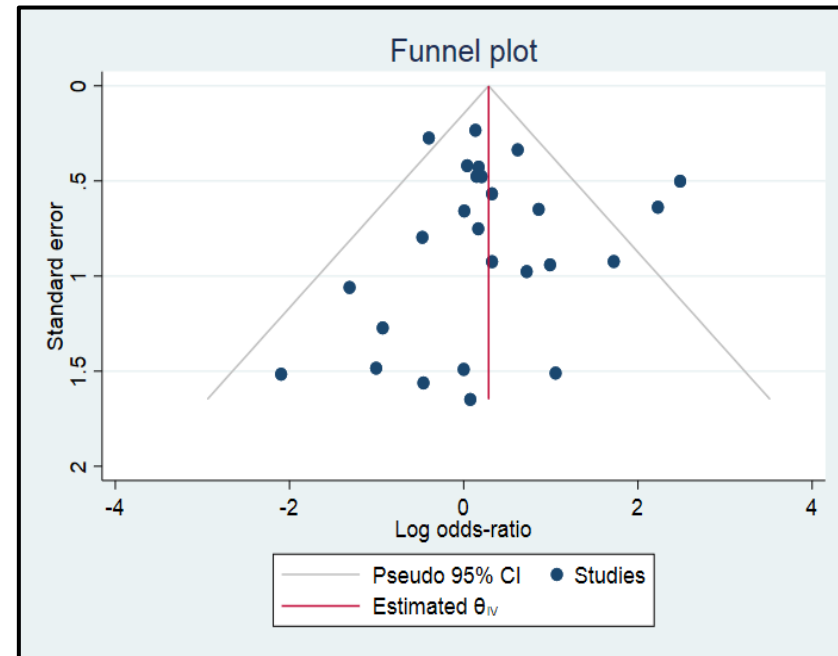

eFigure 94 Pooled Odds ratio of severe disease in patients with anorexia a) Forest plot b) Funnel Plot

94a

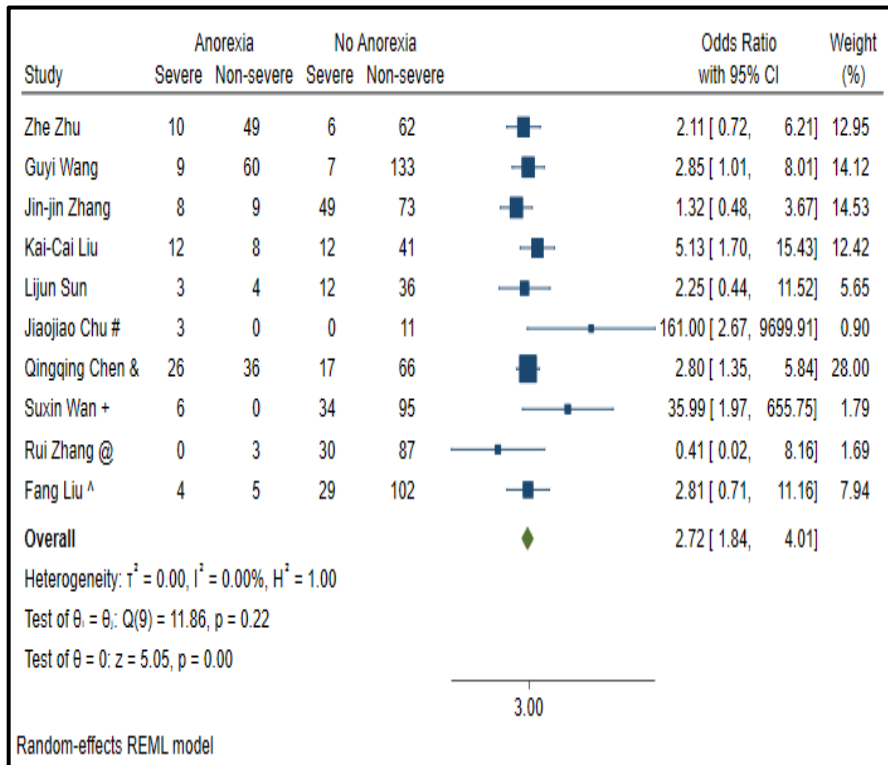

94b

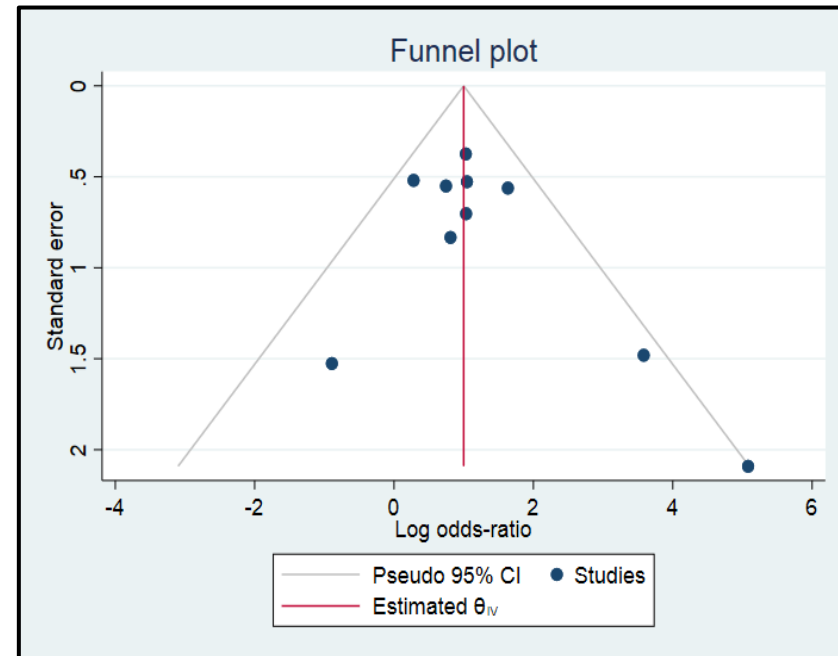

eFigure 95 Pooled Odds ratio of severe disease in patients with chest pain a) Forest plot b) Funnel Plot

95a

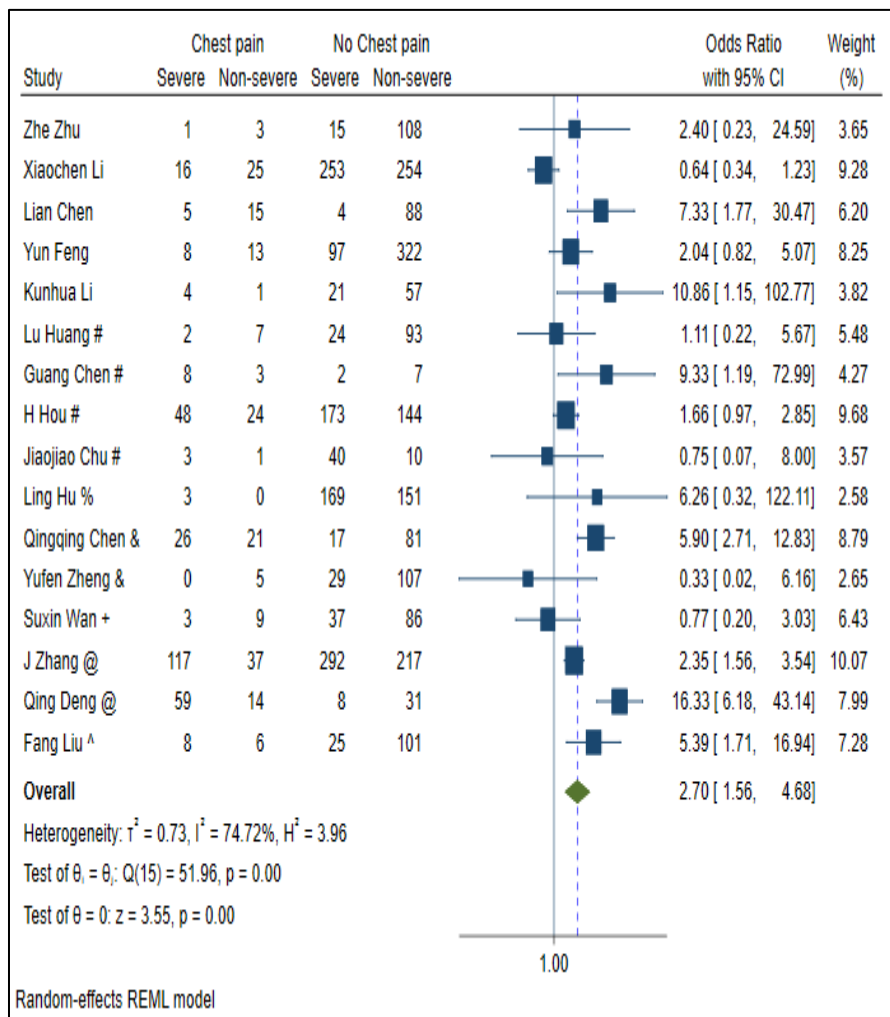

95b

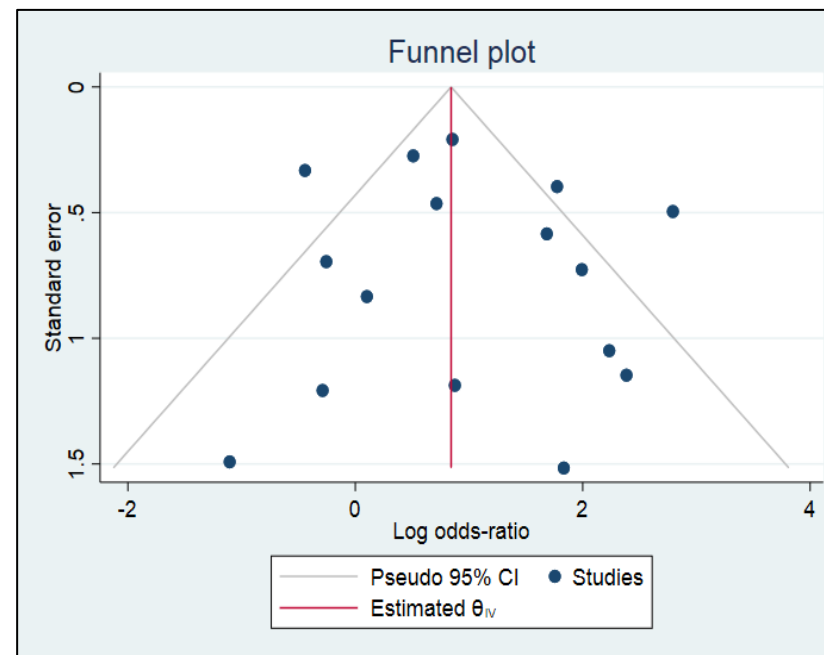

eFigure 96 Pooled Odds ratio of severe disease in patients with dyspnea a) Forest plot b) Funnel Plot

96a

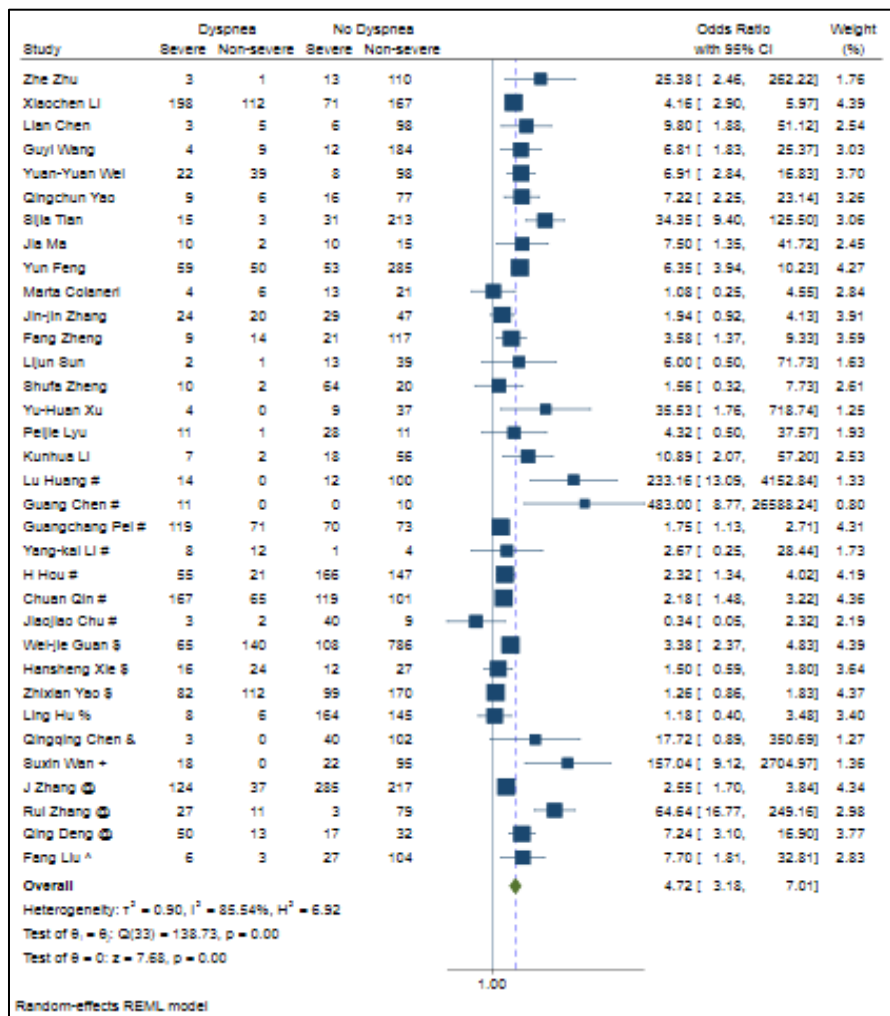

96b

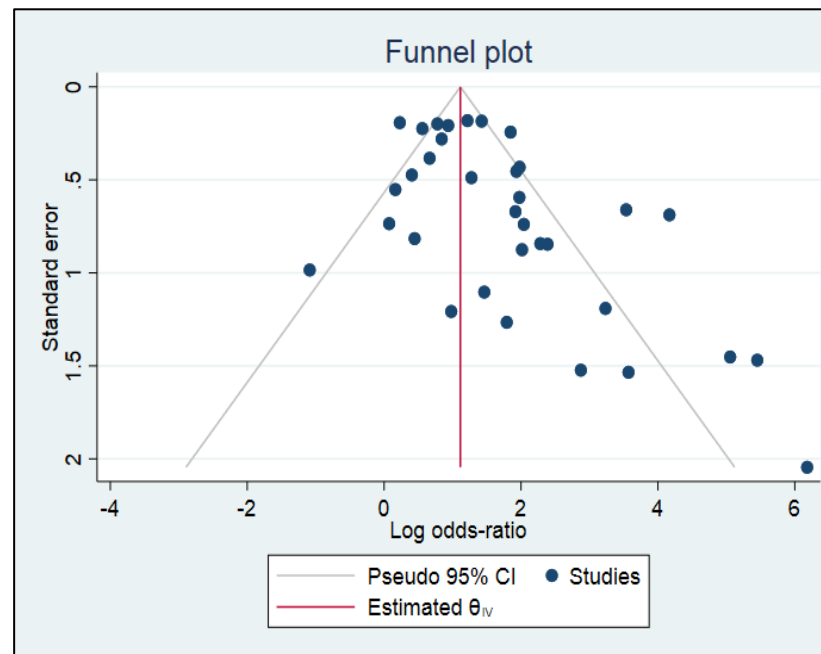

eFigure 97 Pooled Odds ratio of severe disease in patients with hemoptysis - Forest plot

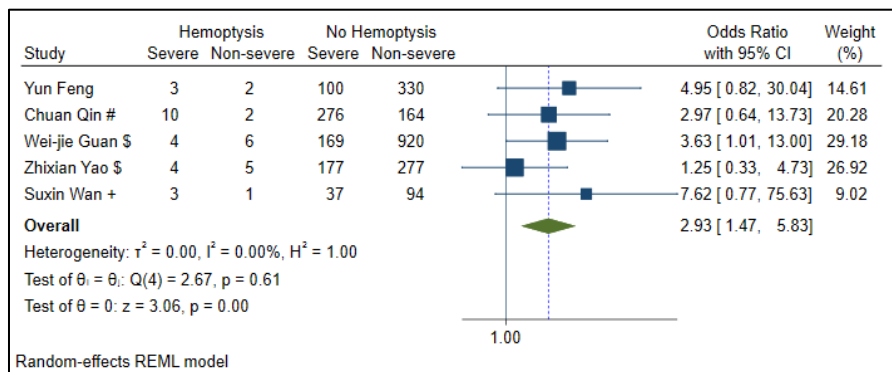

eFigure 98 Pooled Odds ratio of severe disease in patients with abdominal pain - Forest plot

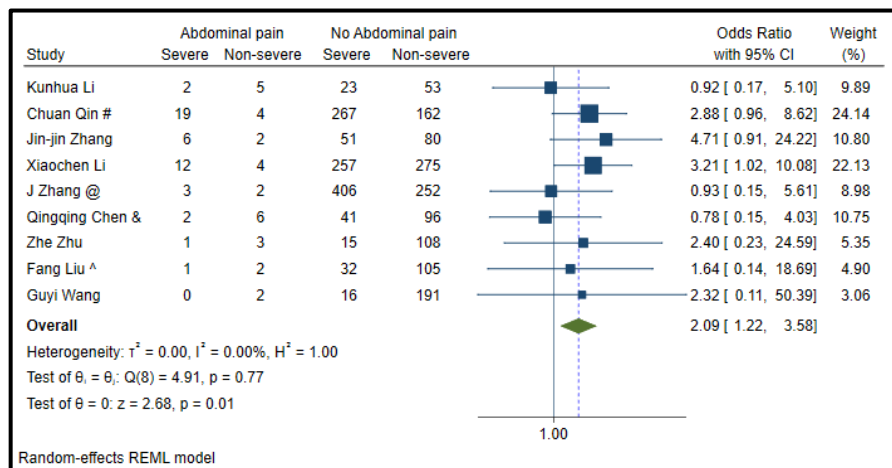



eFigure 99 Pooled Odds ratio of severe disease in patients with palpitations - Forest plot

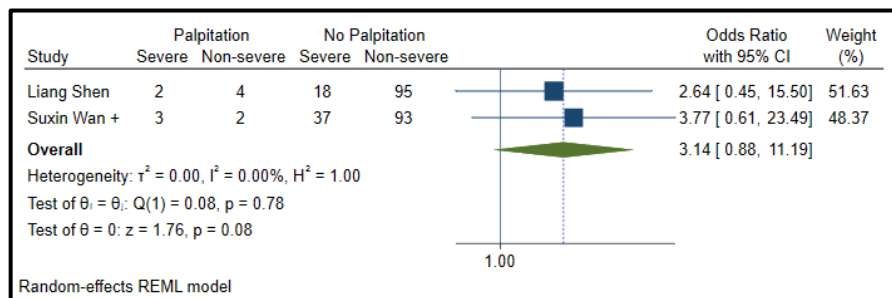

eFigure 100 Pooled Odds ratio of severe disease in patients with rhinorrhea - Forest plot

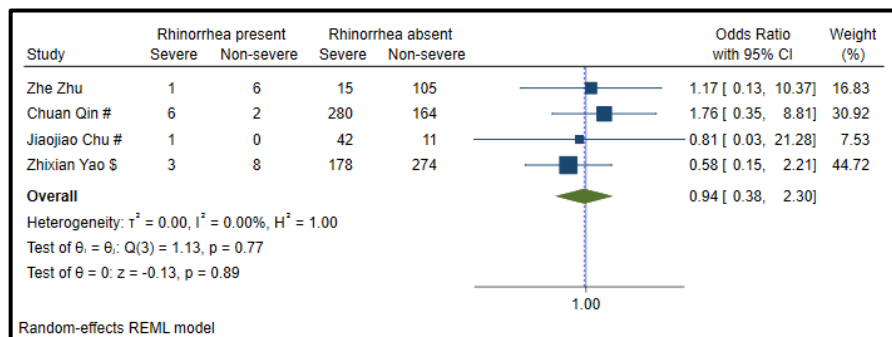

eFigure 101 Pooled Odds ratio of severe disease in patients with fever a) Forest plot b) Funnel Plot

101a

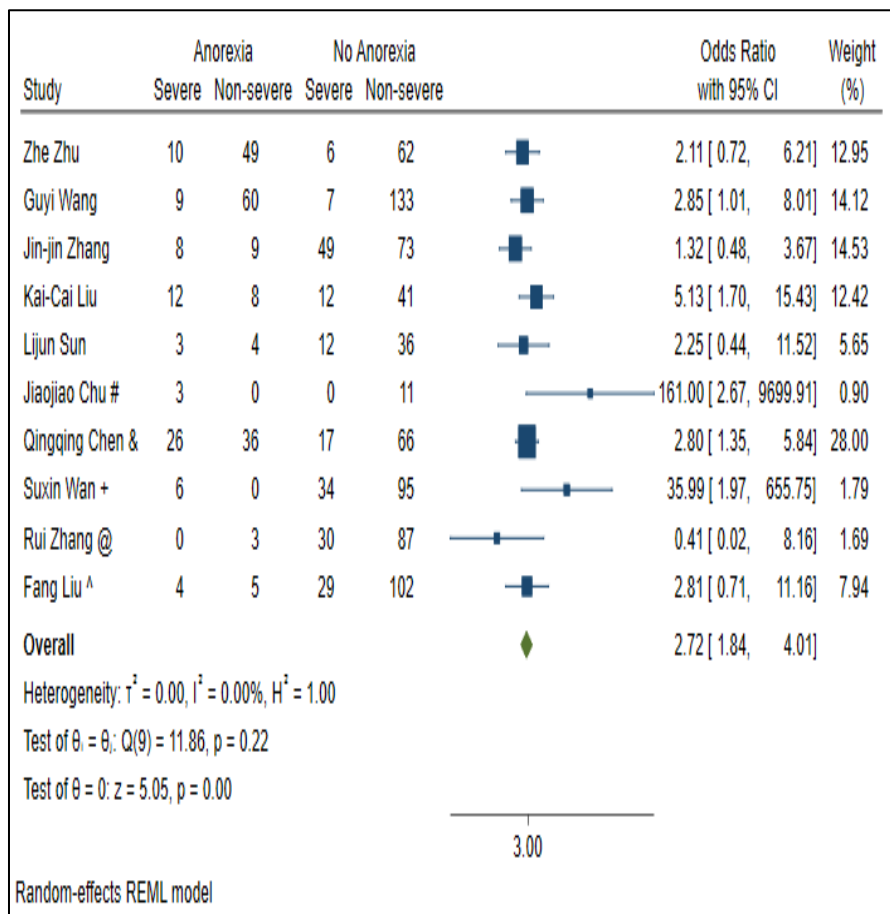

101b

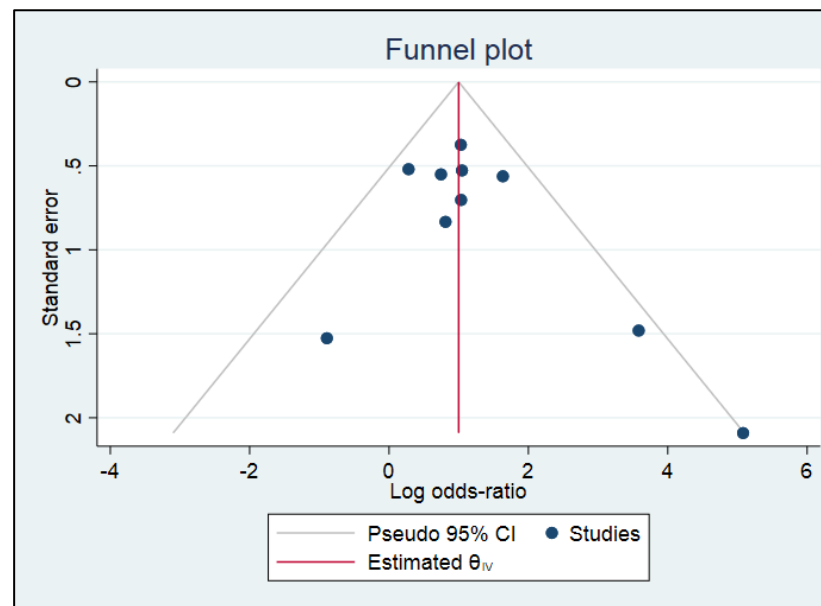

eFigure 102. Pooled Odds of severity in patients with Decreased TLC- Forest plot

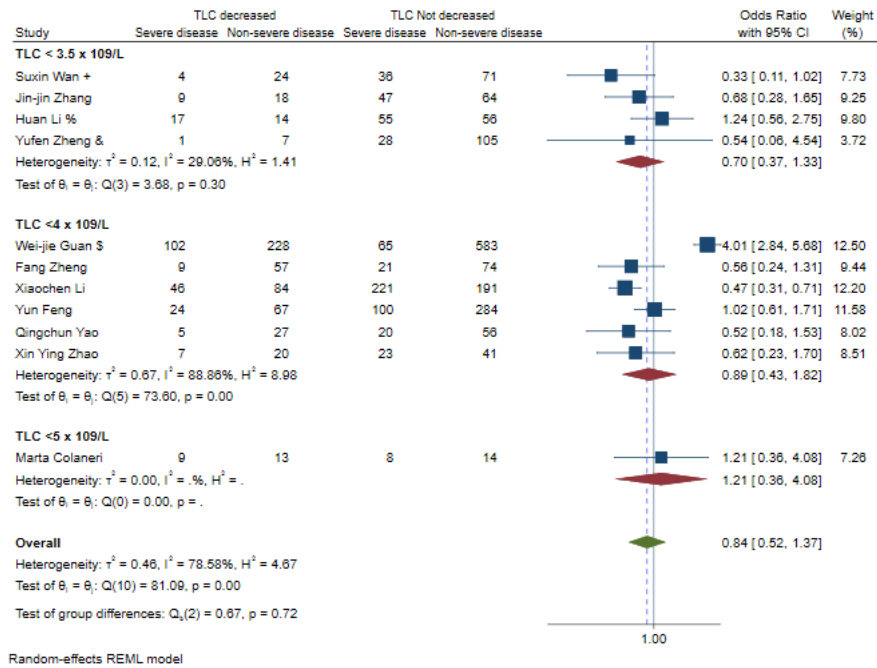

eFigure 103. Pooled Odds of severity in patients with Increased TLC- Forest plot

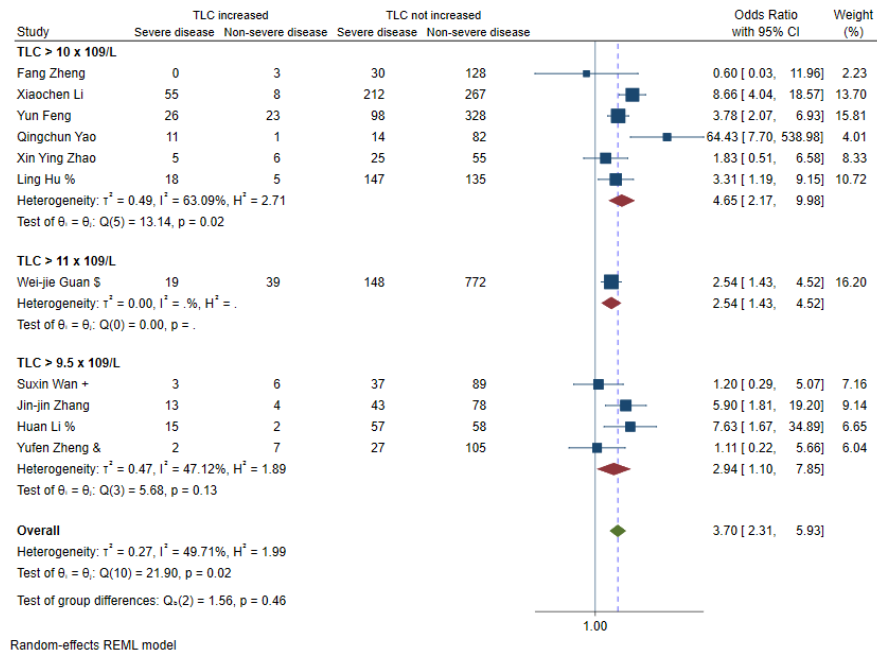

eFigure 104. Pooled Odds of severity in patients with Decreased neutrophil- Forest plot

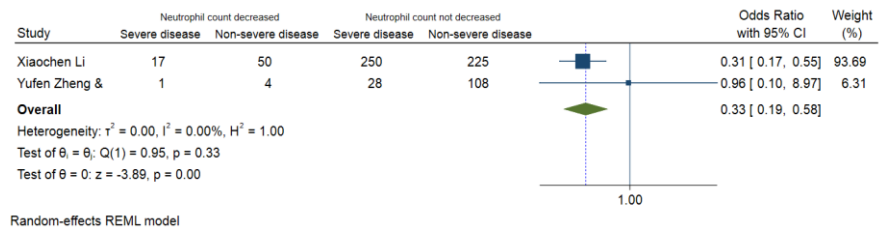

eFigure 105. Pooled Odds of severity in patients with Increased neutrophil- Forest plot

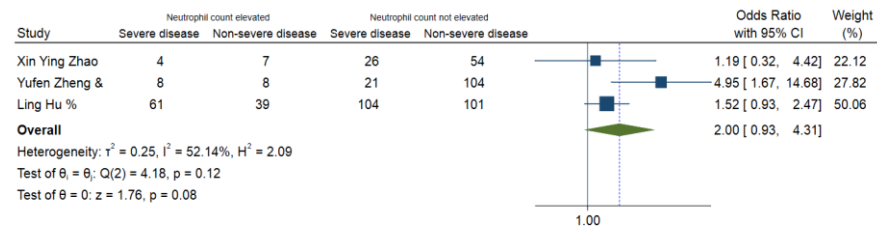

Random-effects REML model

eFigure 106. Pooled Odds of severity in patients with Decreased lymphocyte- Forest plot

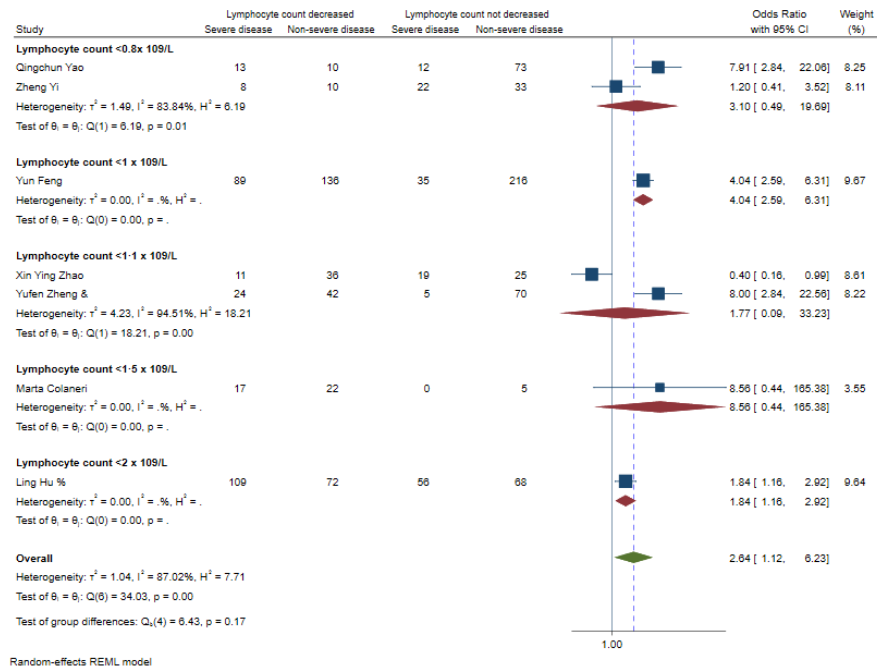



eFigure 107. Pooled Odds of severity in patients with Decreased platelet- Forest plot

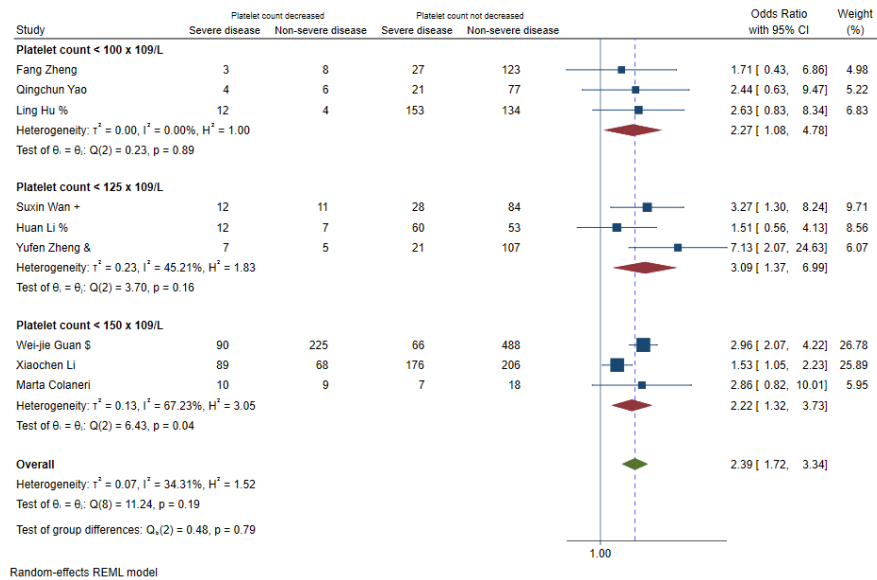

eFigure 108. Pooled Odds of severity in patients with Decreased Albumin- Forest plot

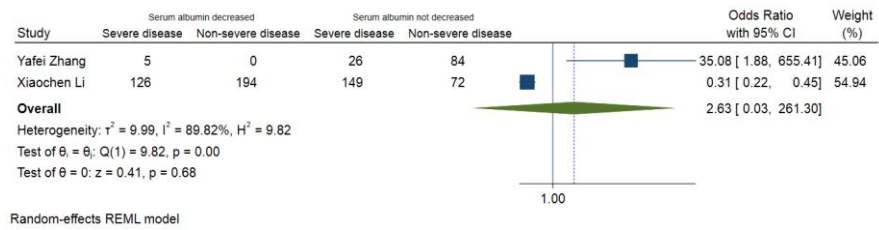

eFigure 109. Pooled Odds of severity in patients with Increased globulin- Forest plot

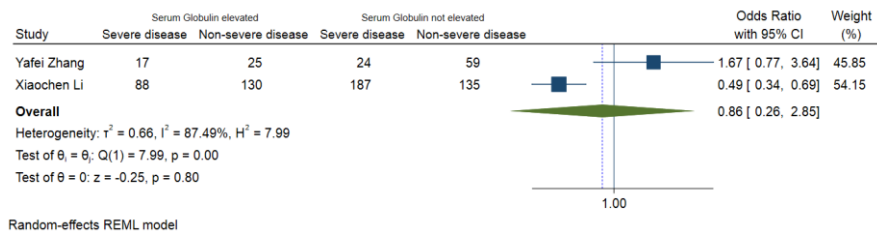

eFigure 110. Pooled Odds of severity in patients with Increased Total bilirubin- Forest plot

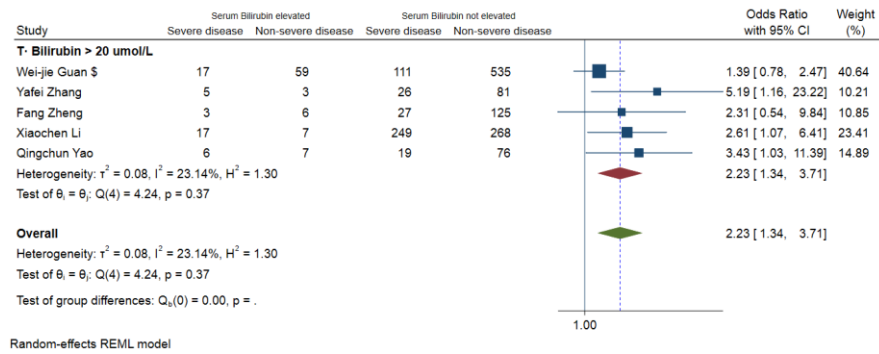

eFigure 111. Pooled Odds of severity in patients with Increased AST- Forest plot

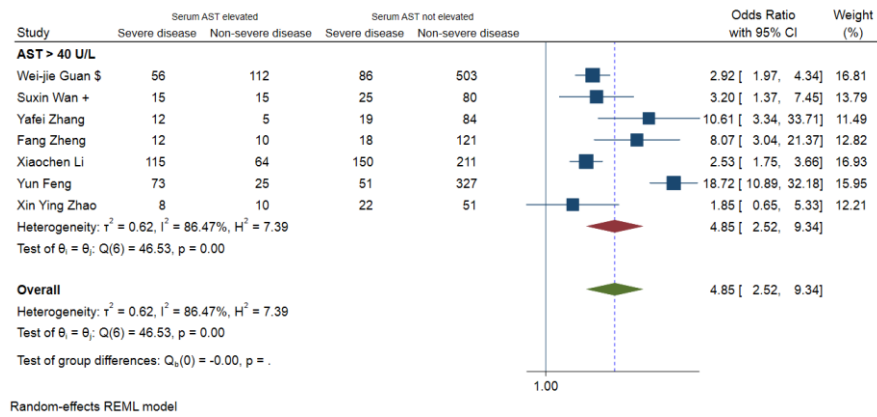

eFigure 112. Pooled Odds of severity in patients with Increased ALT- Forest plot

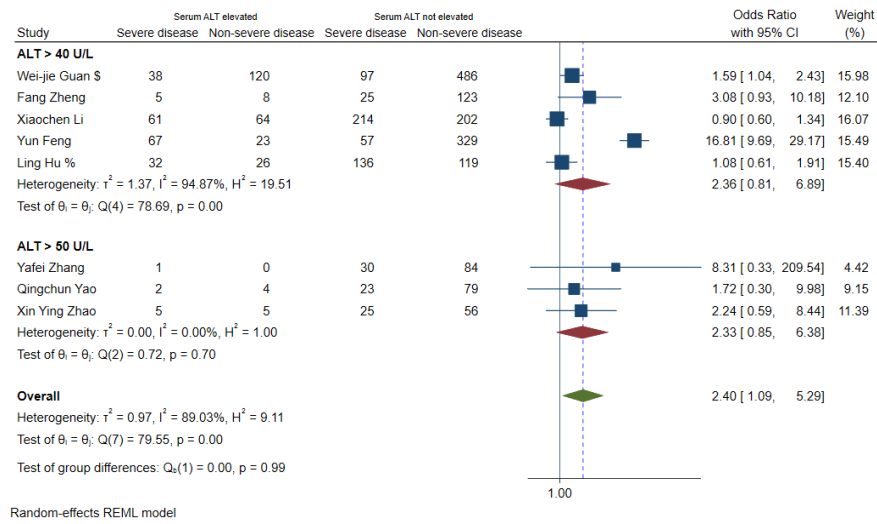

eFigure 113. Pooled Odds of severity in patients with Increased PT- Forest plot

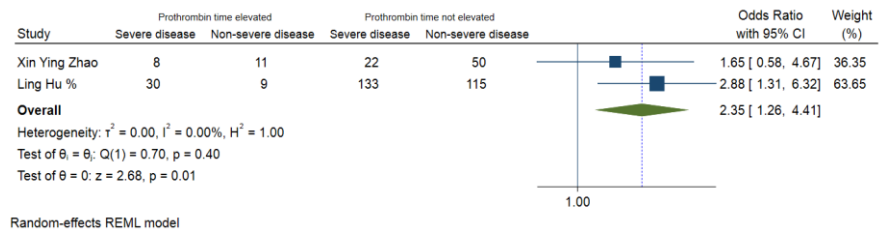

eFigure 114. Pooled Odds of severity in patients with Elevated CK Total- Forest plot

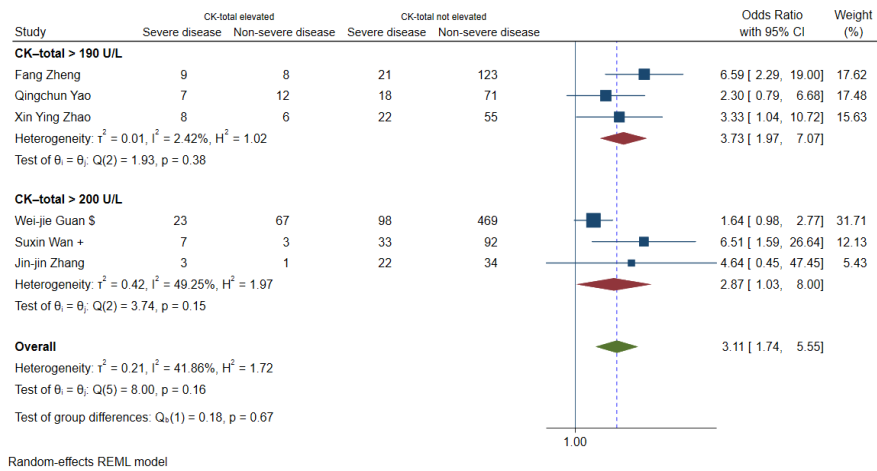



eFigure 115. Pooled Odds of severity in patients with Elevated CK MB- Forest plot

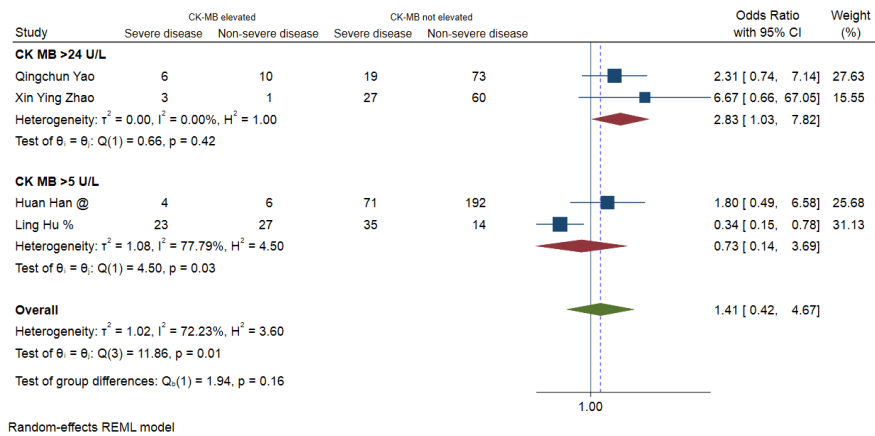

Random-effects REML model

eFigure 116. Pooled Odds of severity in patients with Increased BUN- Forest plot

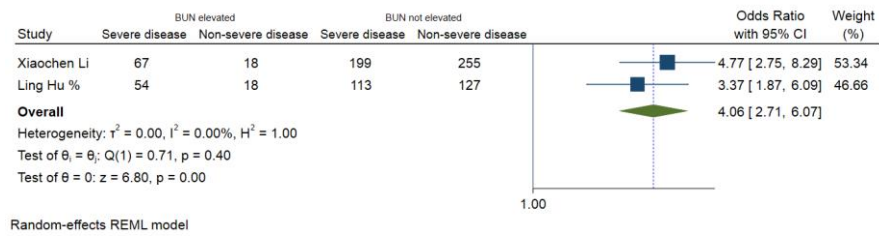

eFigure 117. Pooled Odds of severity in patients with Increased creatinine- Forest plot

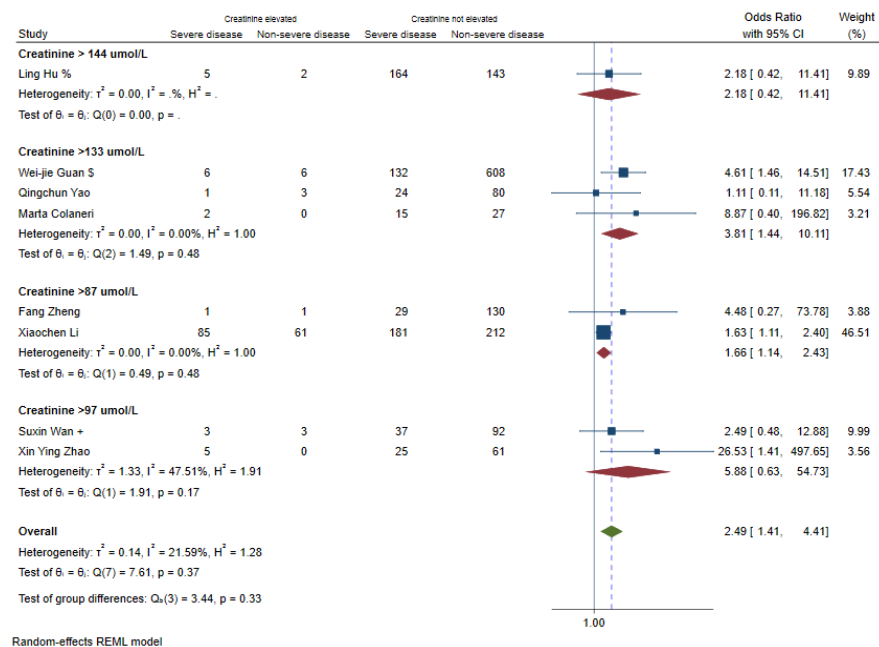

eFigure 118. Pooled Odds of severity in patients with Elevated LDH- Forest plot

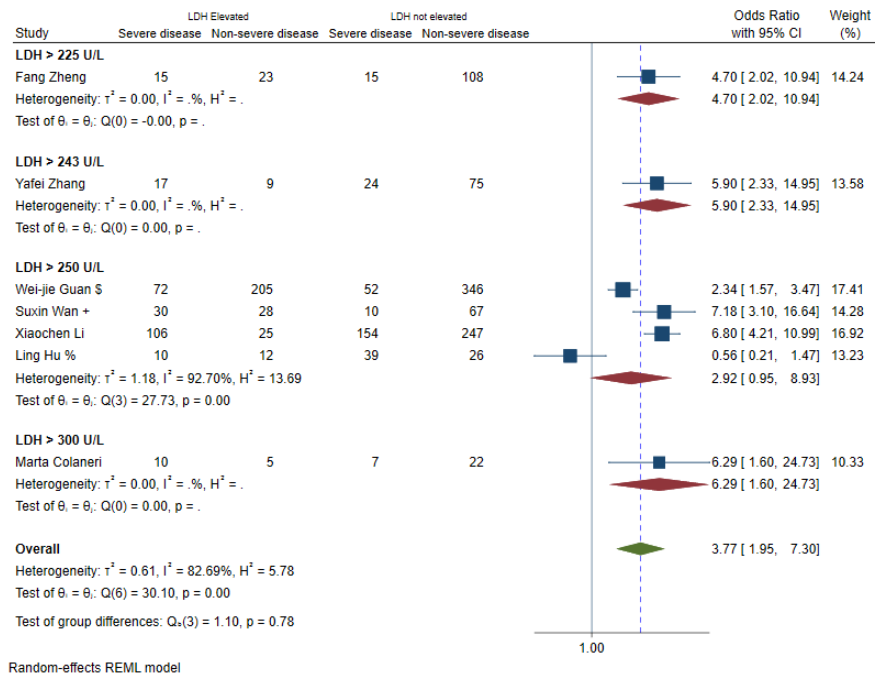

eFigure 119. Pooled Odds of severity in patients with Elevated D-Dimer- Forest plot

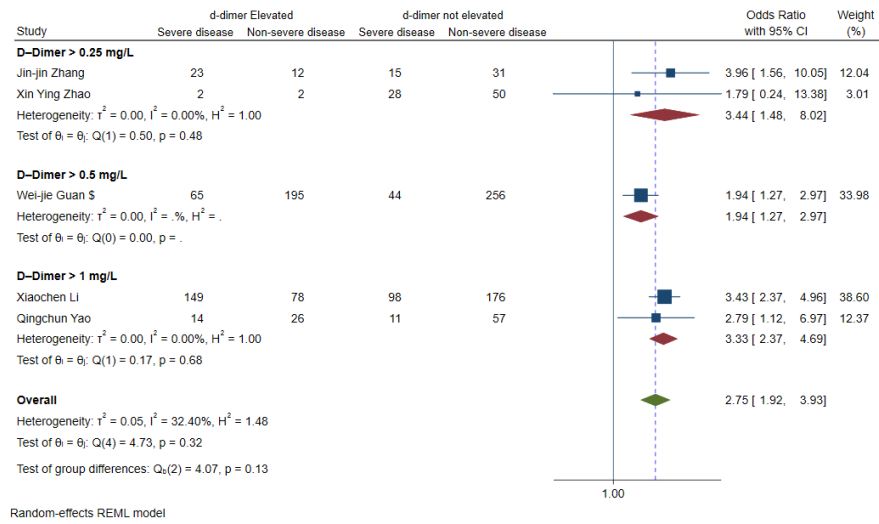

eFigure 120. Pooled Odds of severity in patients with Increased CRP- Forest plot

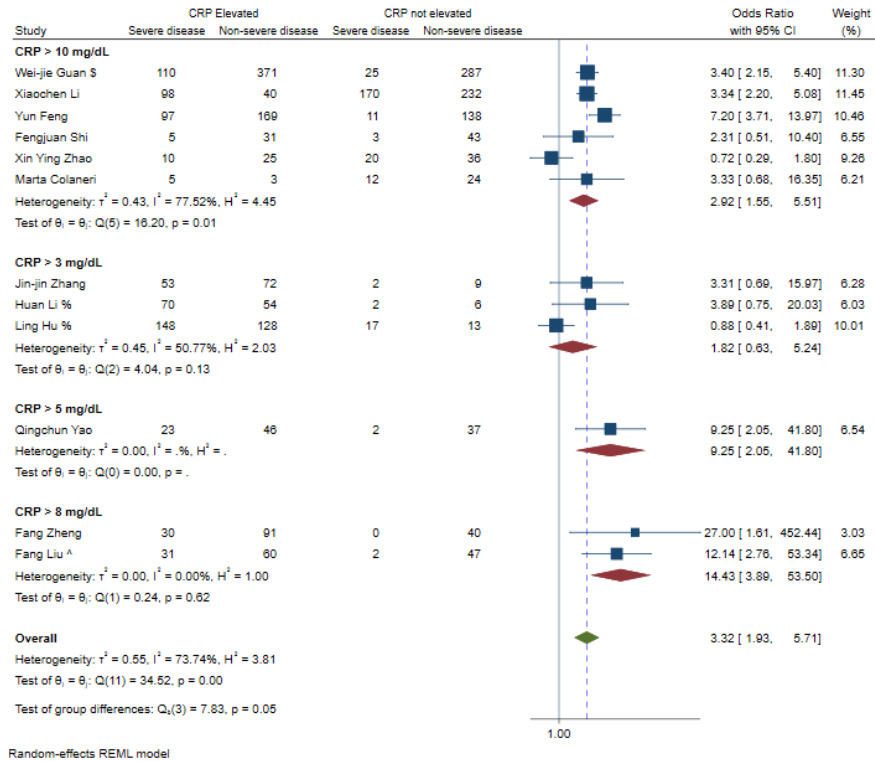

eFigure 121. Pooled Odds of severity in patients with Elevated Procalcitonin- Forest plot

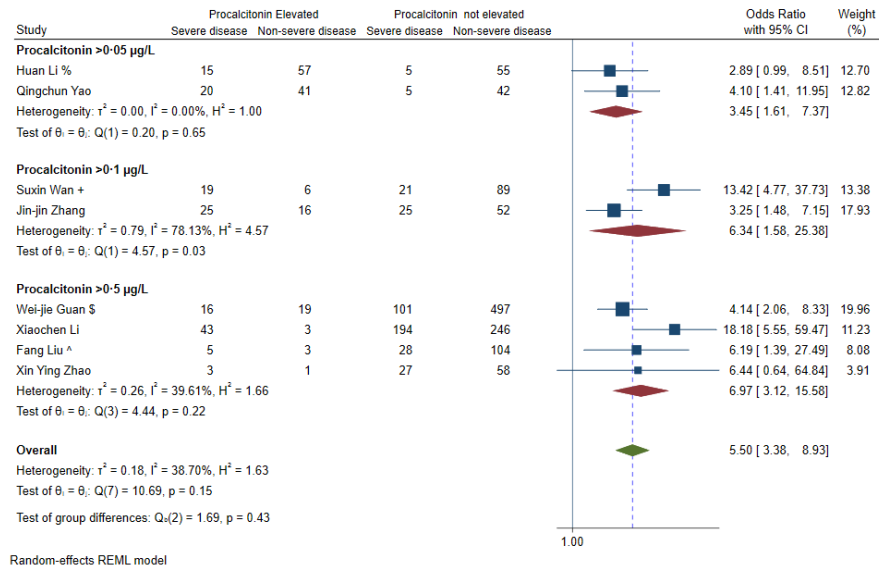

eFigure 122. Pooled Odds of severity in patients with Increased SAA- Forest plot

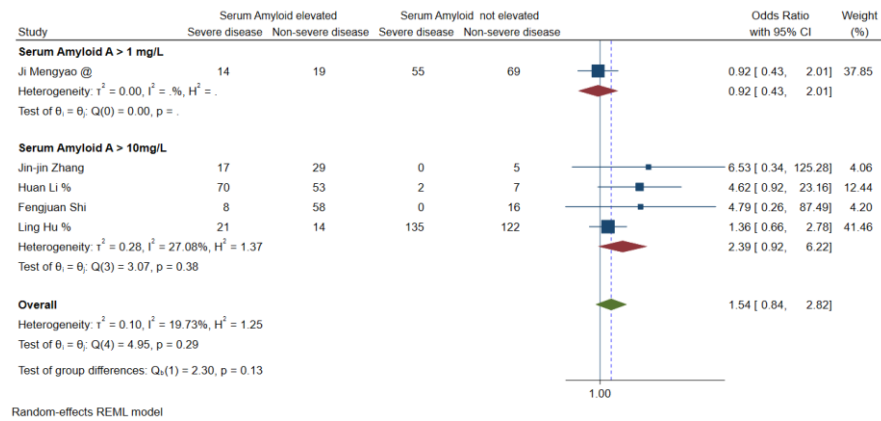



eFigure 123. Pooled Odds of severity in patients with Increased IL-6- Forest plot

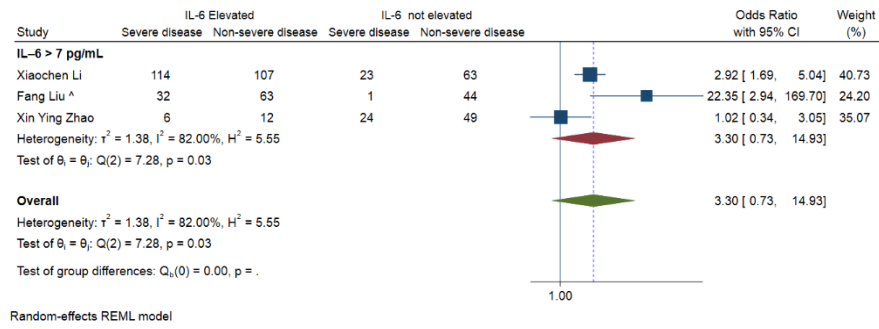

eFigure 124. Pooled Odds of severity in patients with Increased NT-ProBNP- Forest plot

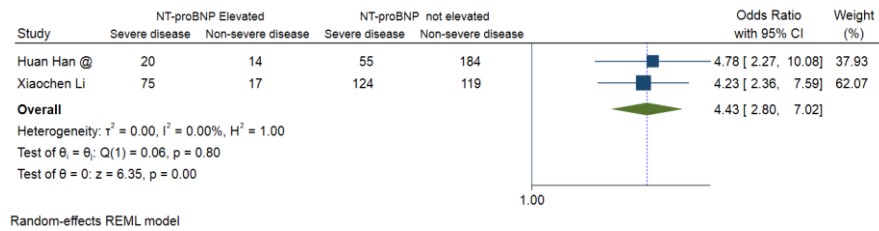

eFigure 125. Pooled Odds of severity in patients with Elevated troponin- Forest plot

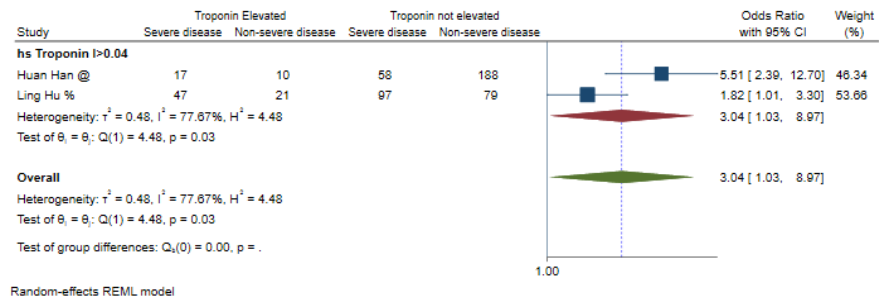

eFigure 126 Pooled Odds ratio of severe disease in patients with radiological peripheral lung involvement - Forest plot

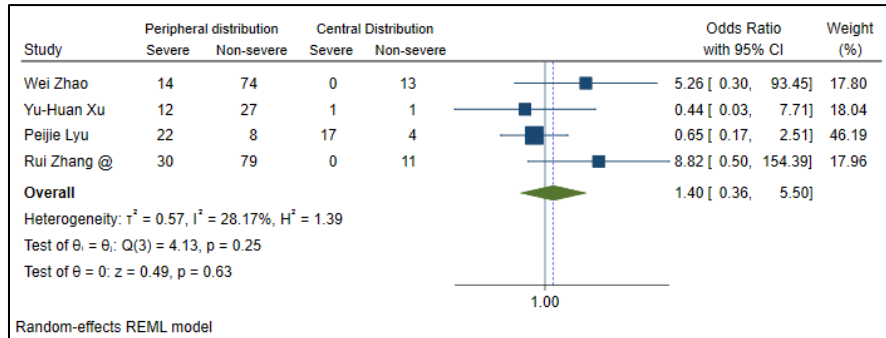

eFigure 127 Pooled Odds ratio of severe disease in patients with radiological bilateral lung involvement a) Forest plot b) Funnel Plot

127a

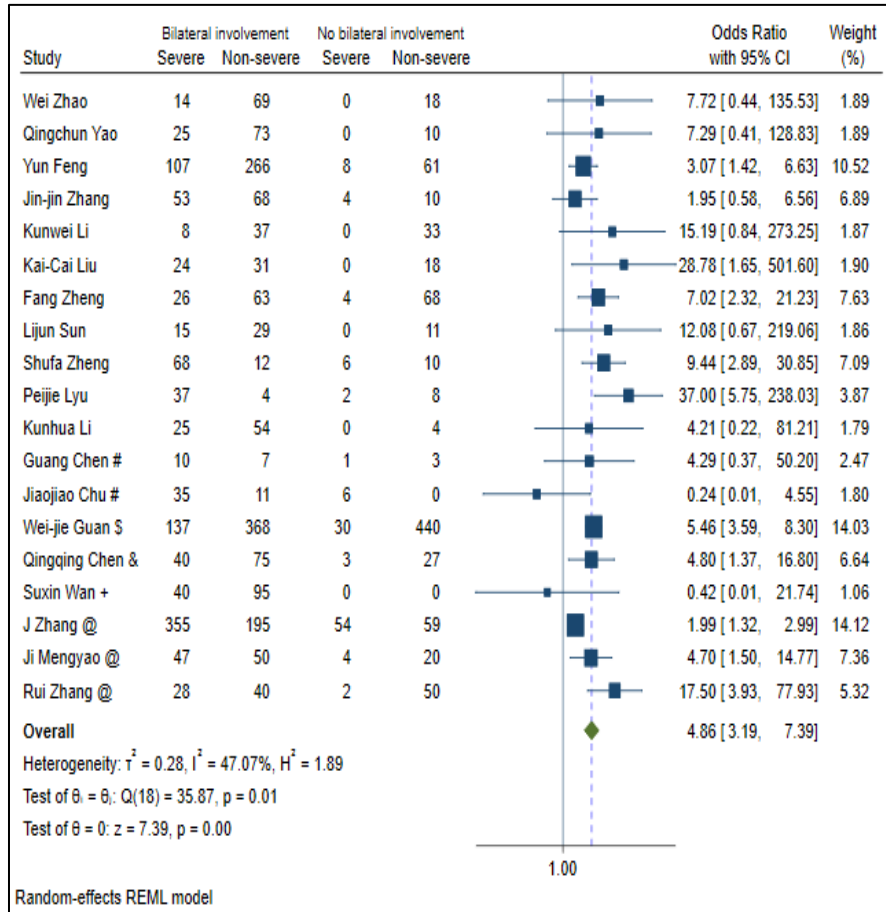

127b

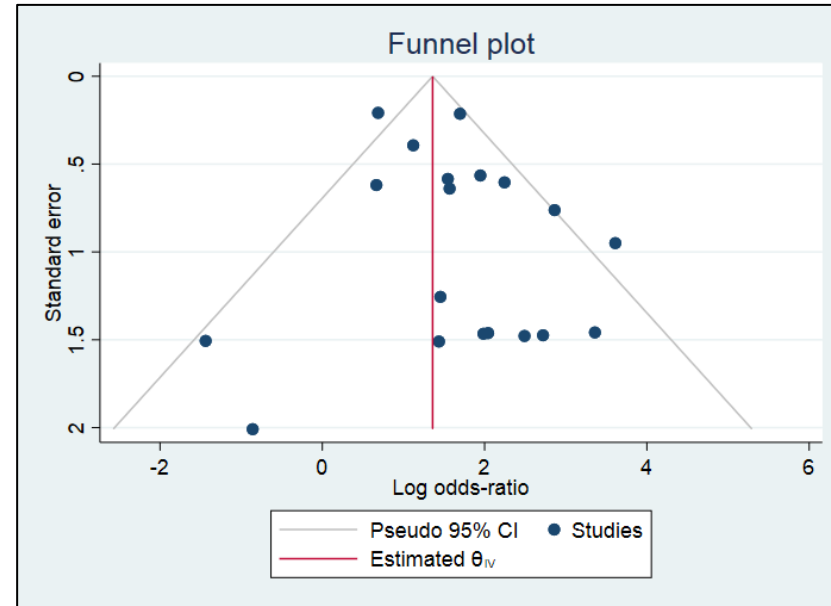

eFigure 128 Pooled Odds ratio of severe disease in patients with consolidation - Forest plot

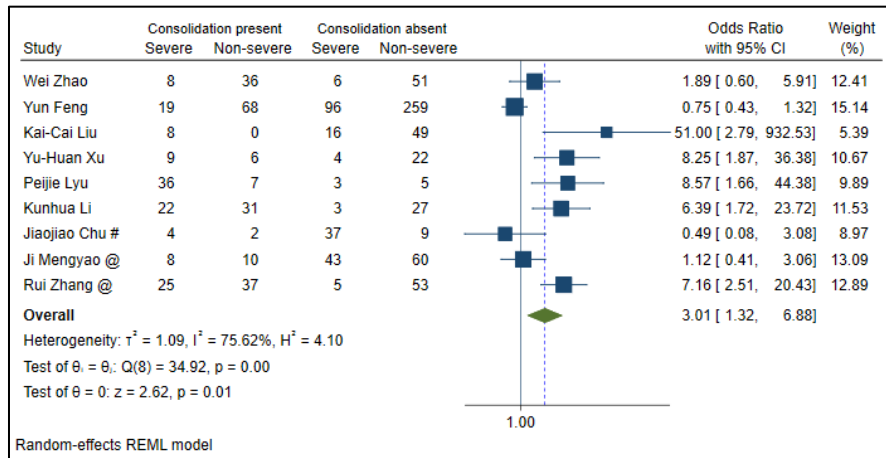

eFigure 129 Pooled Odds ratio of severe disease in patients with ground glass opacity - Forest plot

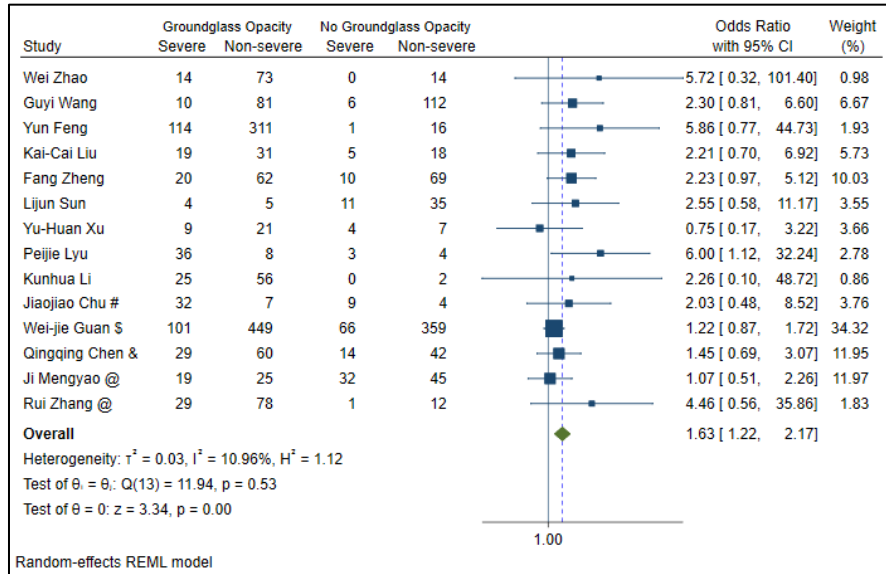

eFigure 130 Pooled Odds ratio of severe disease in patients with mixed GGO - Forest plot

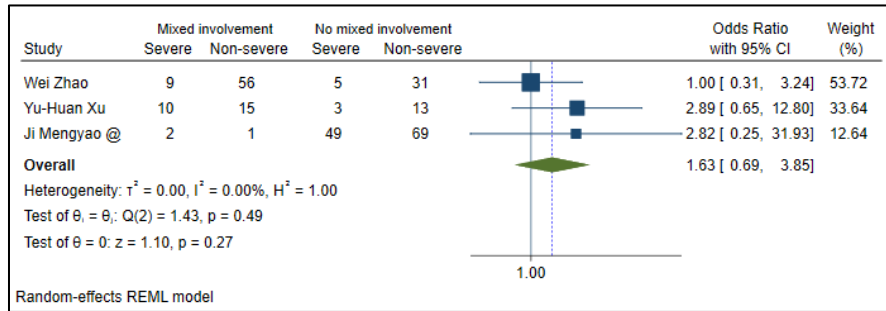



eFigure 131 Pooled Odds ratio of severe disease in patients with air bronchogram - Forest plot

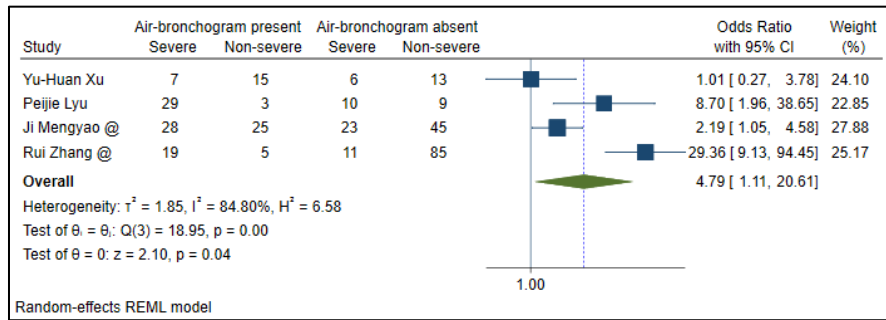

eFigure 132 Pooled Odds ratio of severe disease in patients with nodular infiltrates - Forest plot

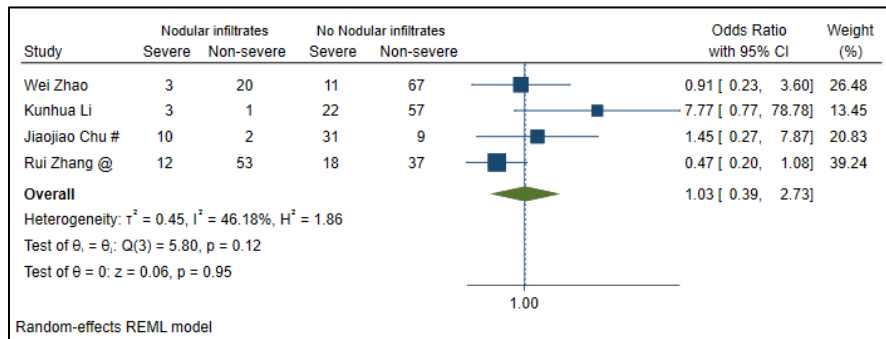

eFigure 133 Pooled Odds ratio of severe disease in patients with consolidation - Forest plot

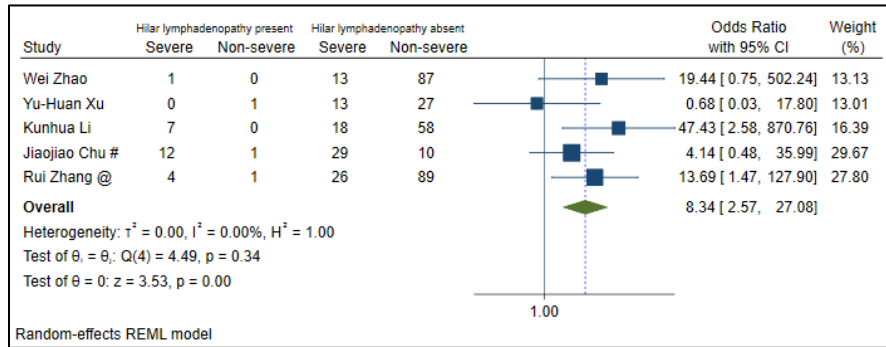

eFigure 134 Pooled Odds ratio of severe disease in patients with radiological unifocal involvement - Forest plot

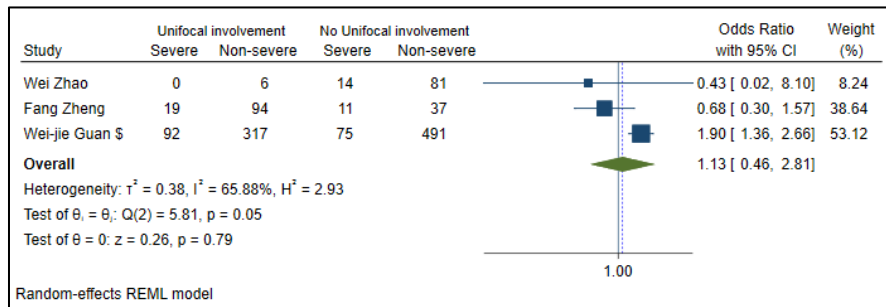

eFigure 135 Pooled Odds ratio of severe disease in patients with pleural effusion - Forest plot

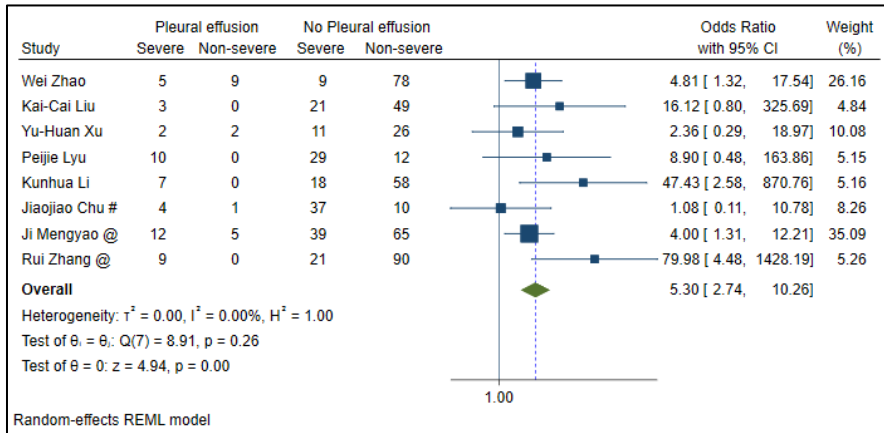

eFigure 136 Pooled Odds ratio of severe disease in patients with interlobular septal thickening - Forest plot

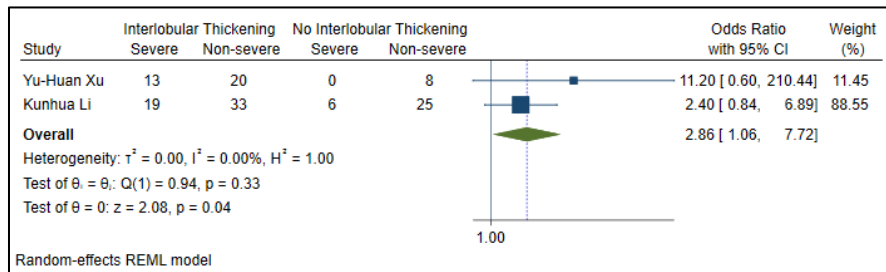

eFigure 137 Pooled Odds ratio of severe disease in patients with bronchiectasis- Forest plot

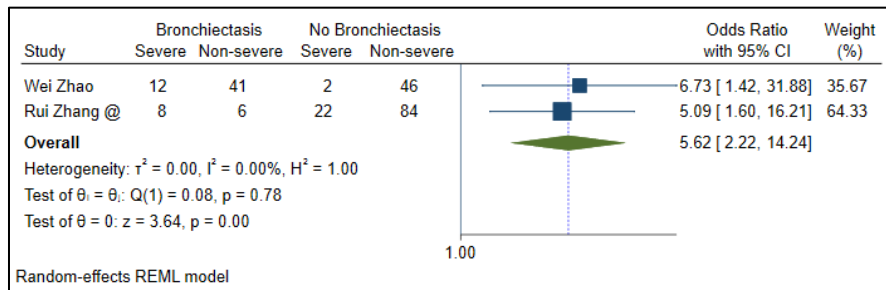

eFigure 138 Pooled Odds ratio of severe disease in patients with Linear opacity - Forest plot

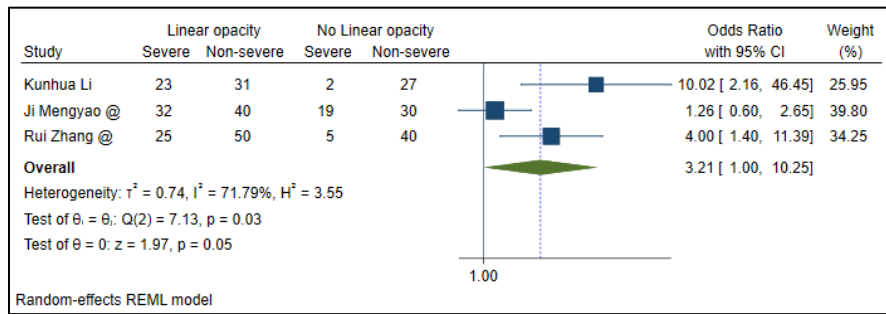



eFigure 139 Pooled Odds ratio of severe disease in patients with crazy pavement sign - Forest plot

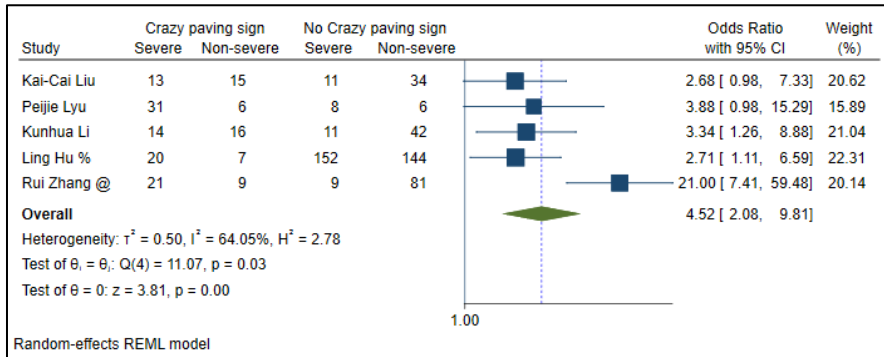

eFigure 140 Pooled Odds ratio of severe disease in patients with reticular pattern - Forest plot

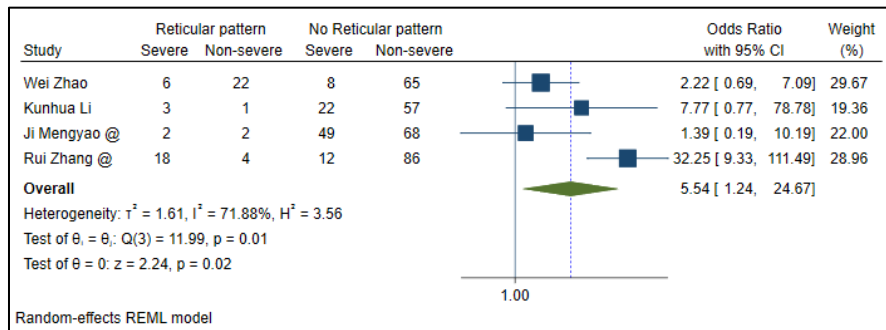

## **Section VII**

### **Supplementary figures**

**Association of clinical and laboratory characteristics as continuous variables with mortality and severe disease in patients with COVID 19**

eFigure 141 Percentage change in mortality with unit increase in mean age

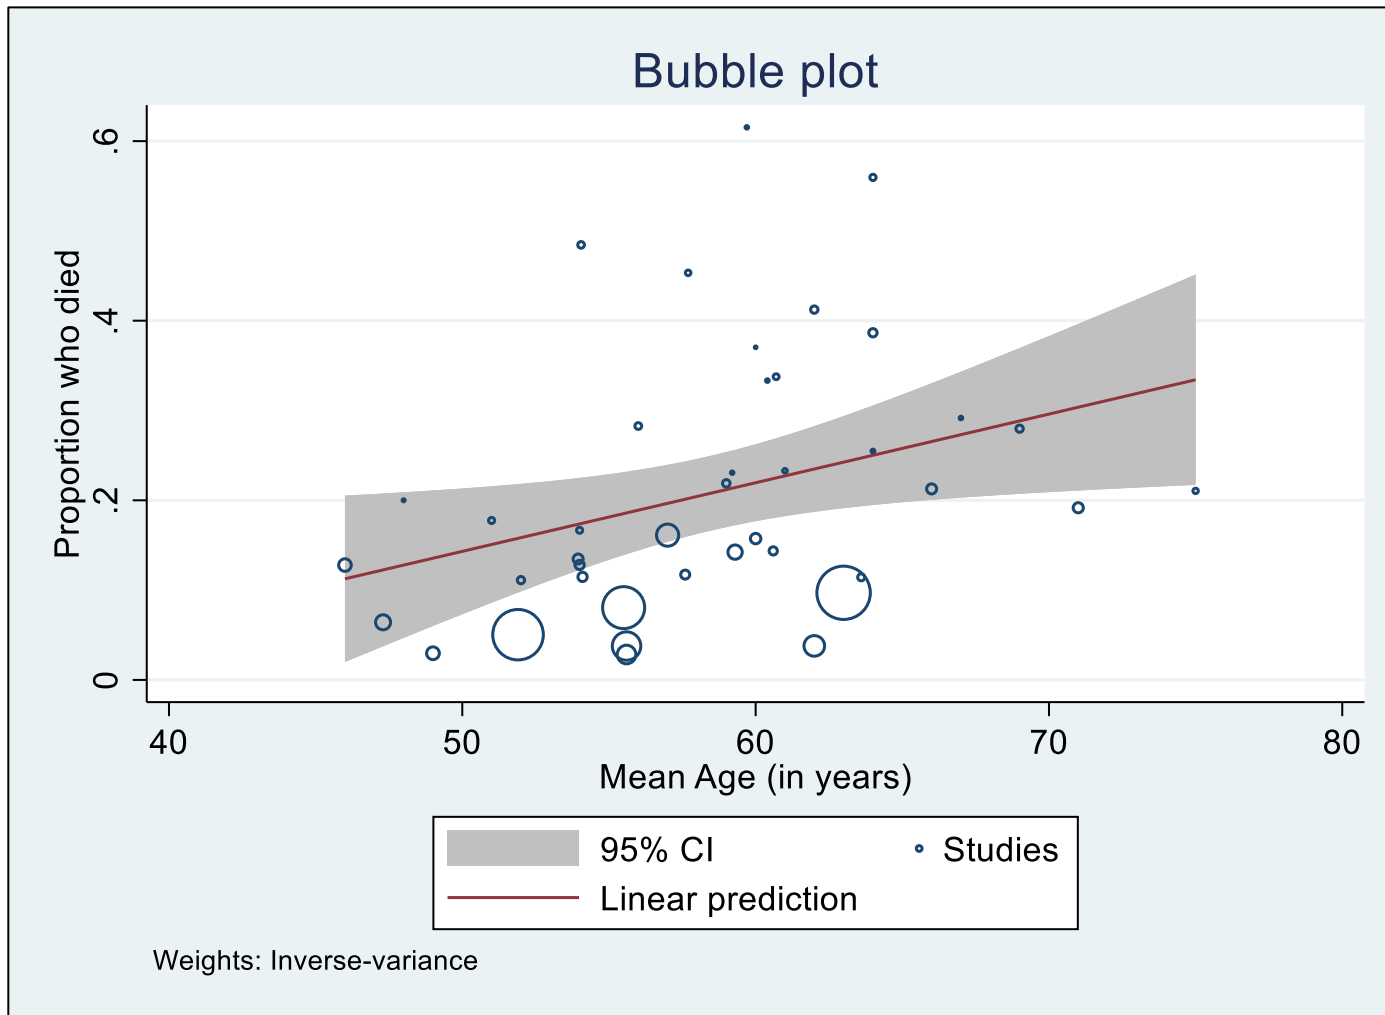

eFigure 142 Percentage change in mortality with unit increase in mean Hb

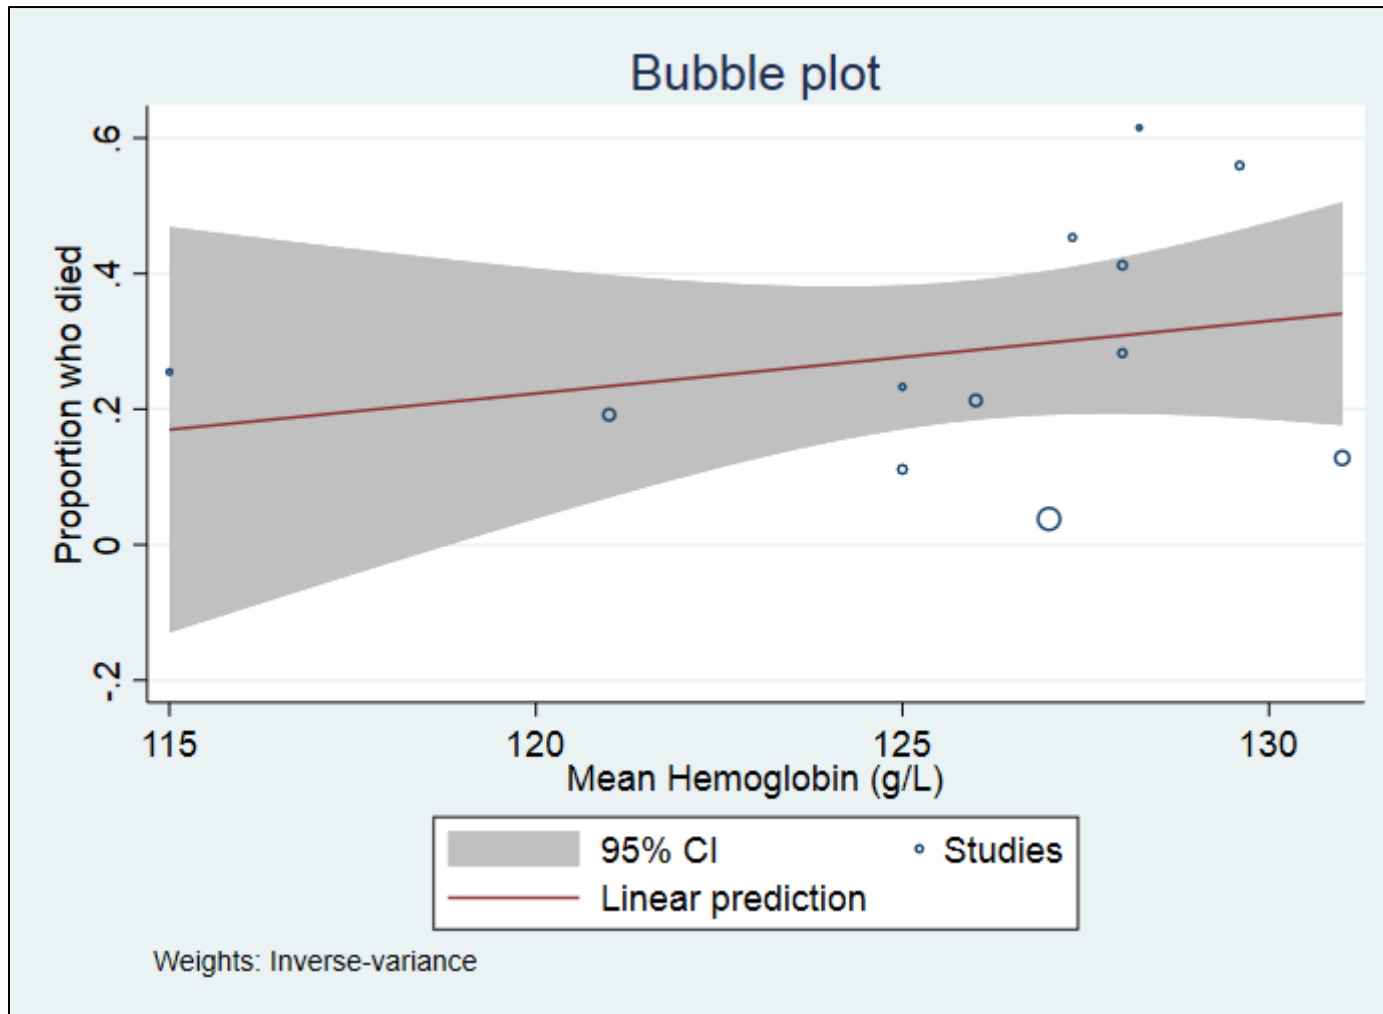

eFigure 143 Percentage change in mortality with unit increase in mean Total leukocyte count

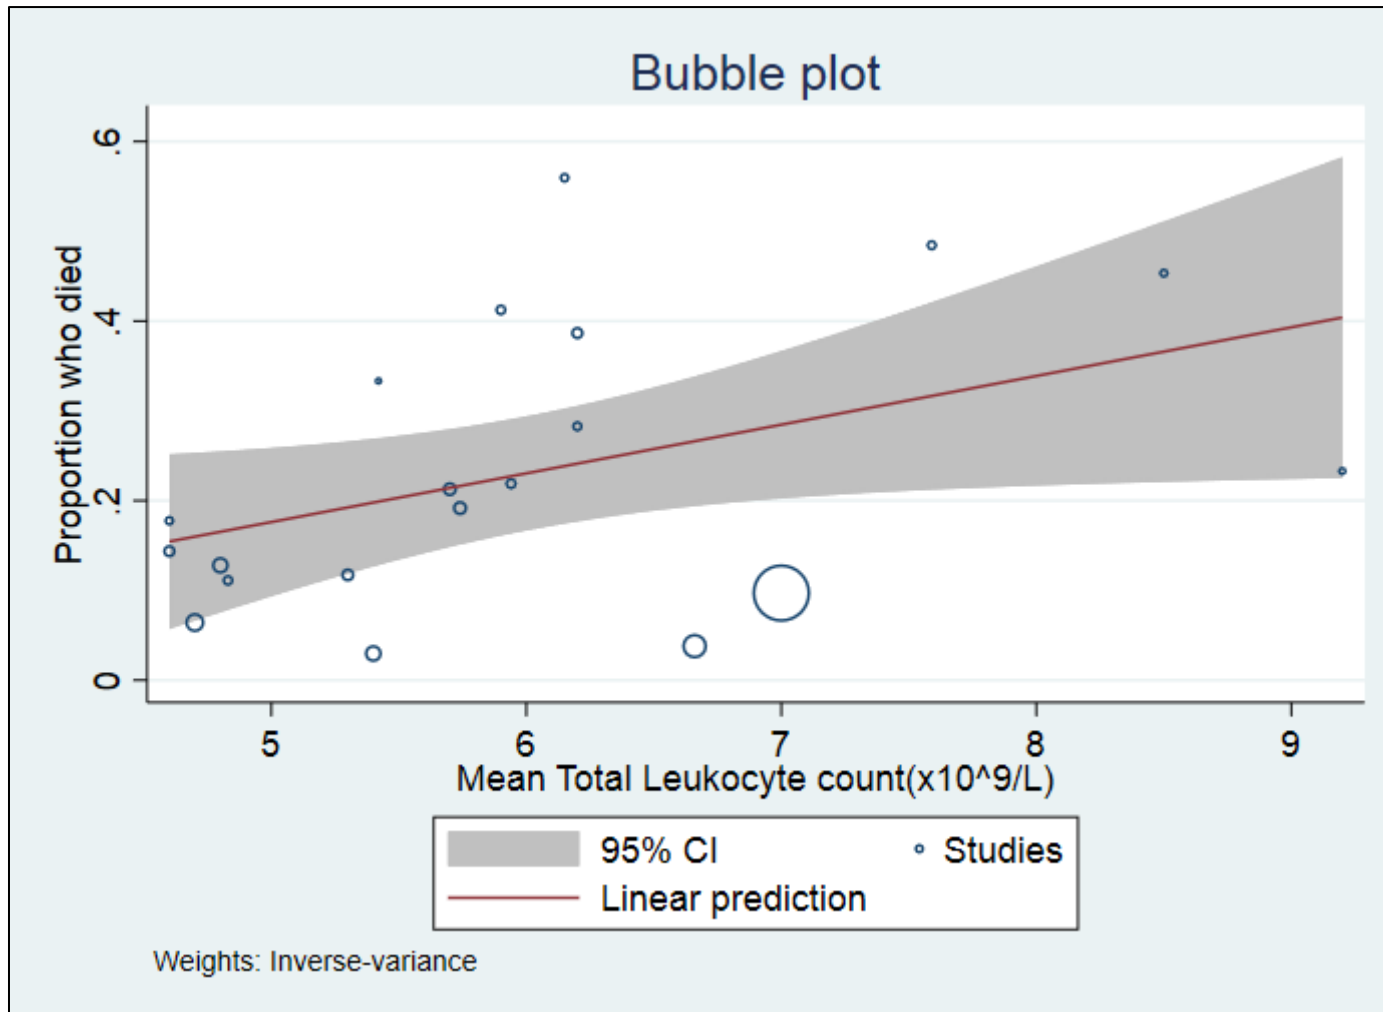

eFigure 144 Percentage change in mortality with unit increase in mean lymphocyte count

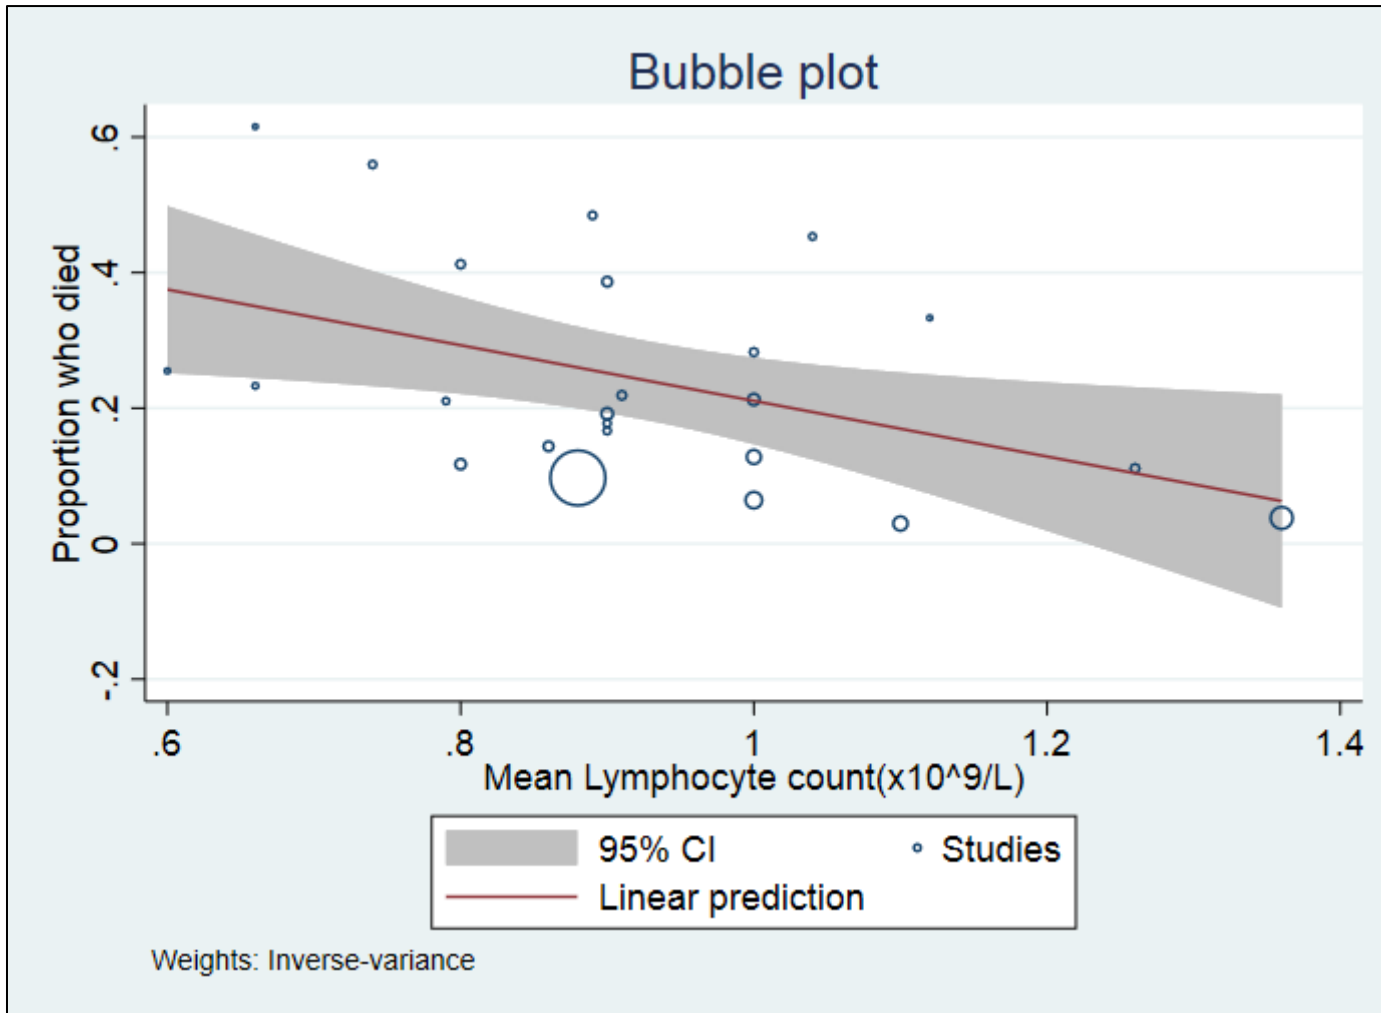

eFigure 145 Percentage change in mortality with unit increase in mean neutrophil count

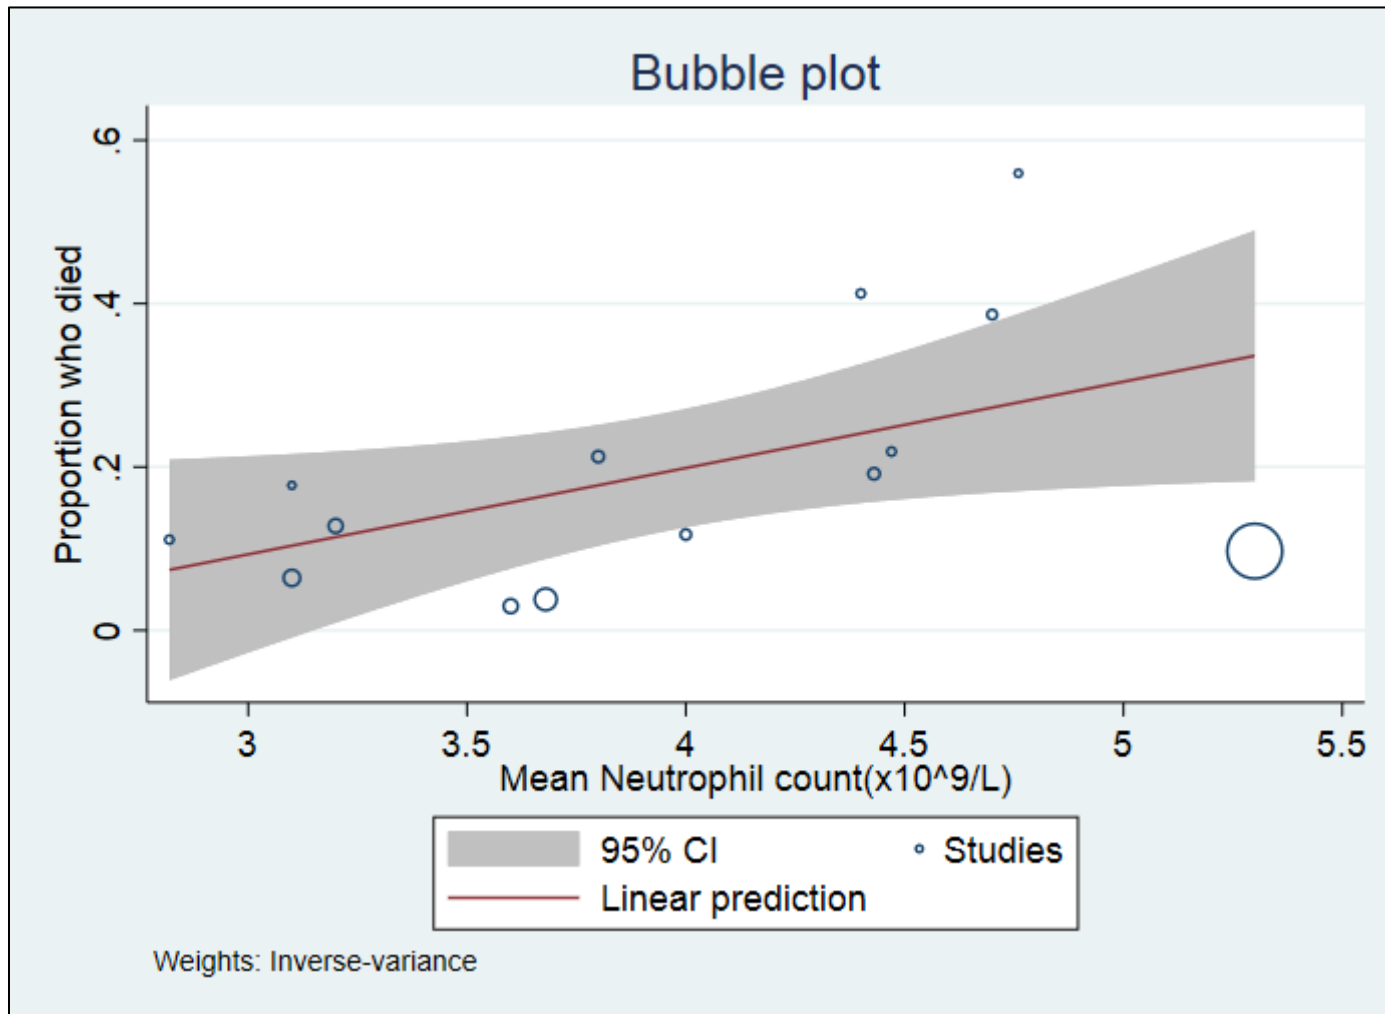



eFigure 146 Percentage change in mortality with unit increase in mean platelet count

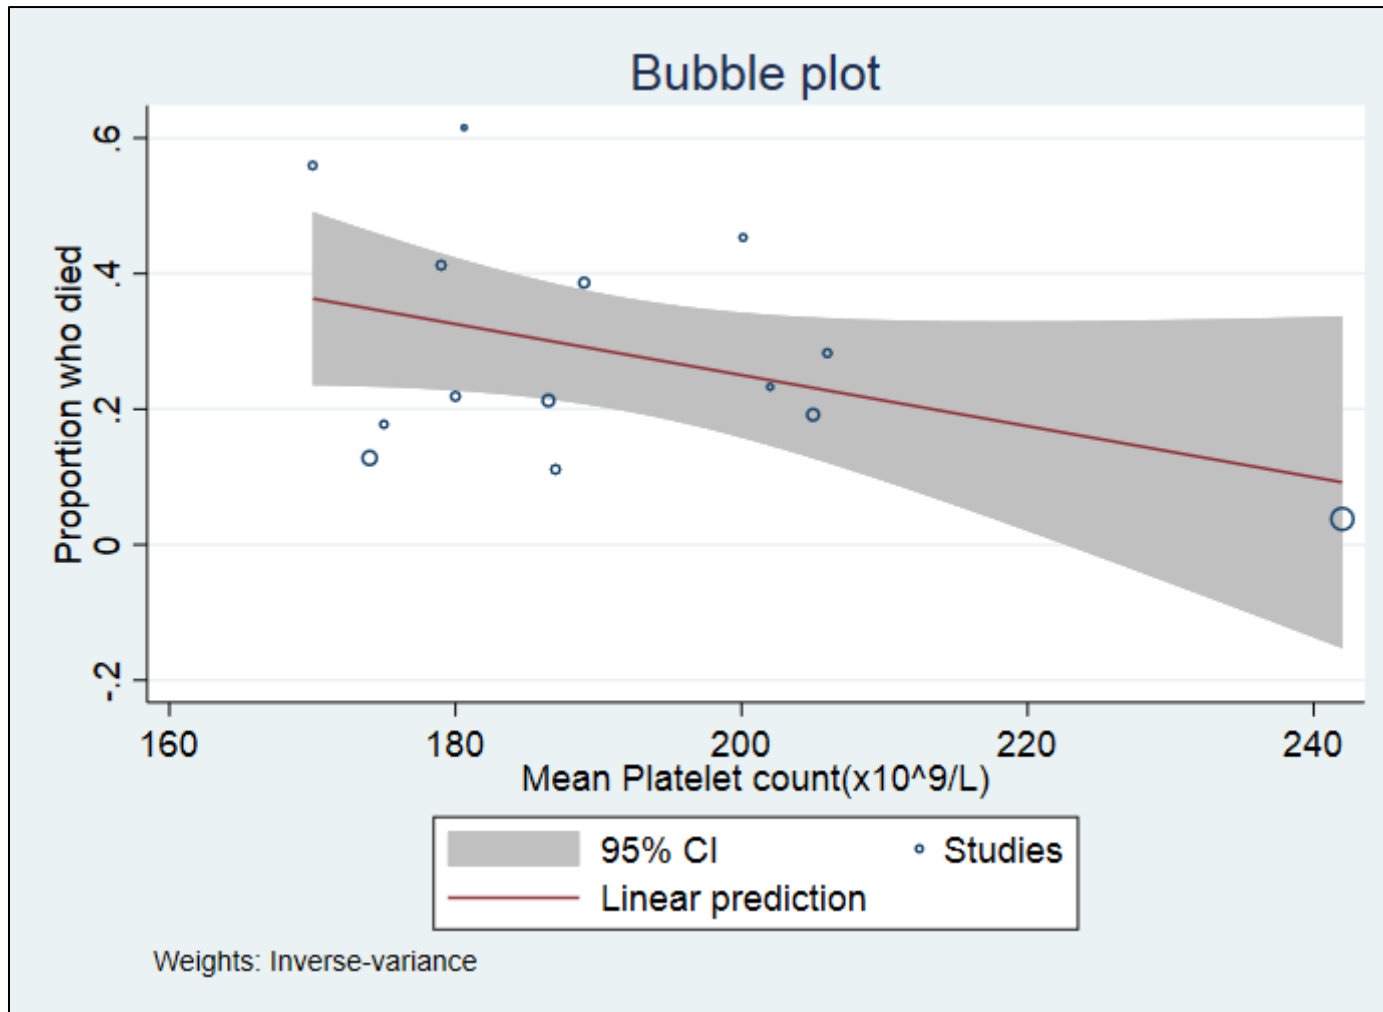

eFigure 147 Percentage change in mortality with unit increase in mean prothrombin time

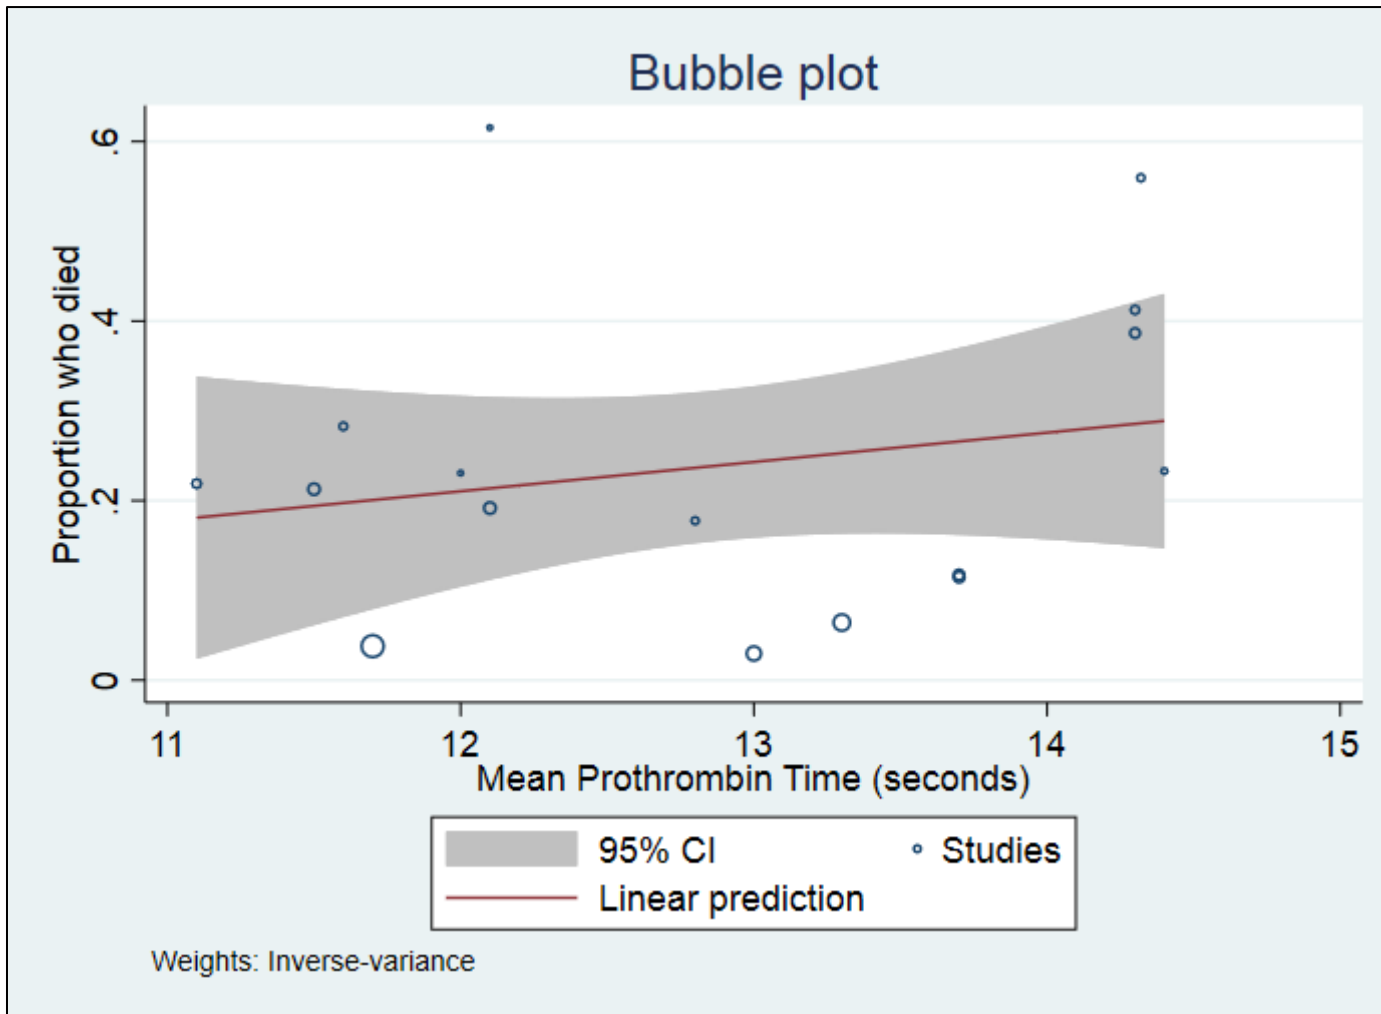

eFigure 148 Percentage change in mortality with unit increase in mean aPTT

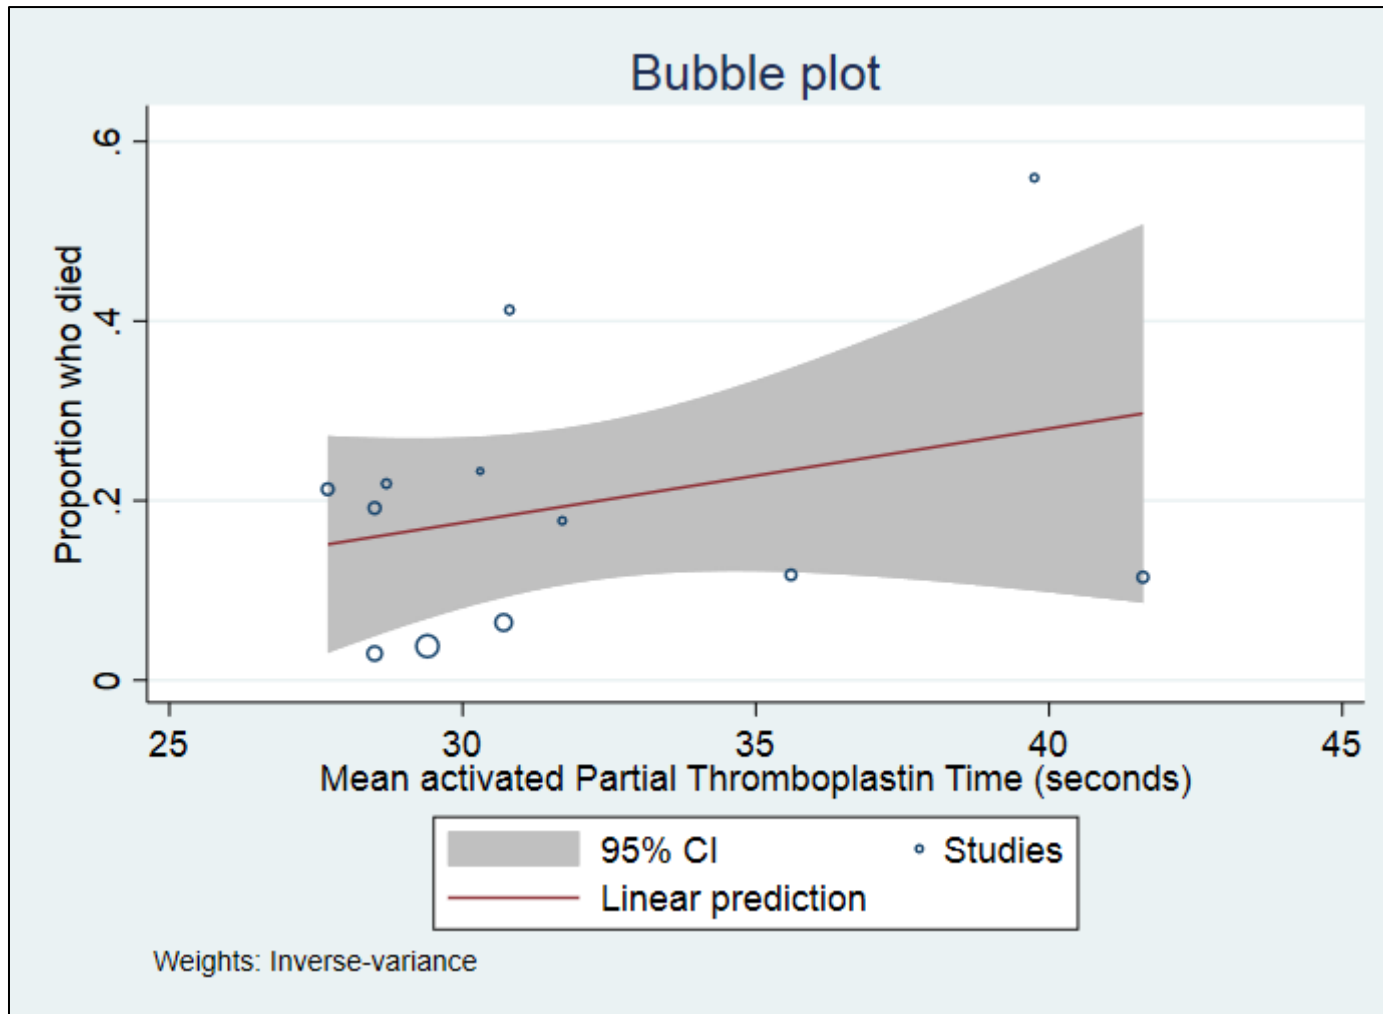

eFigure 149 Percentage change in mortality with unit increase in mean CRP

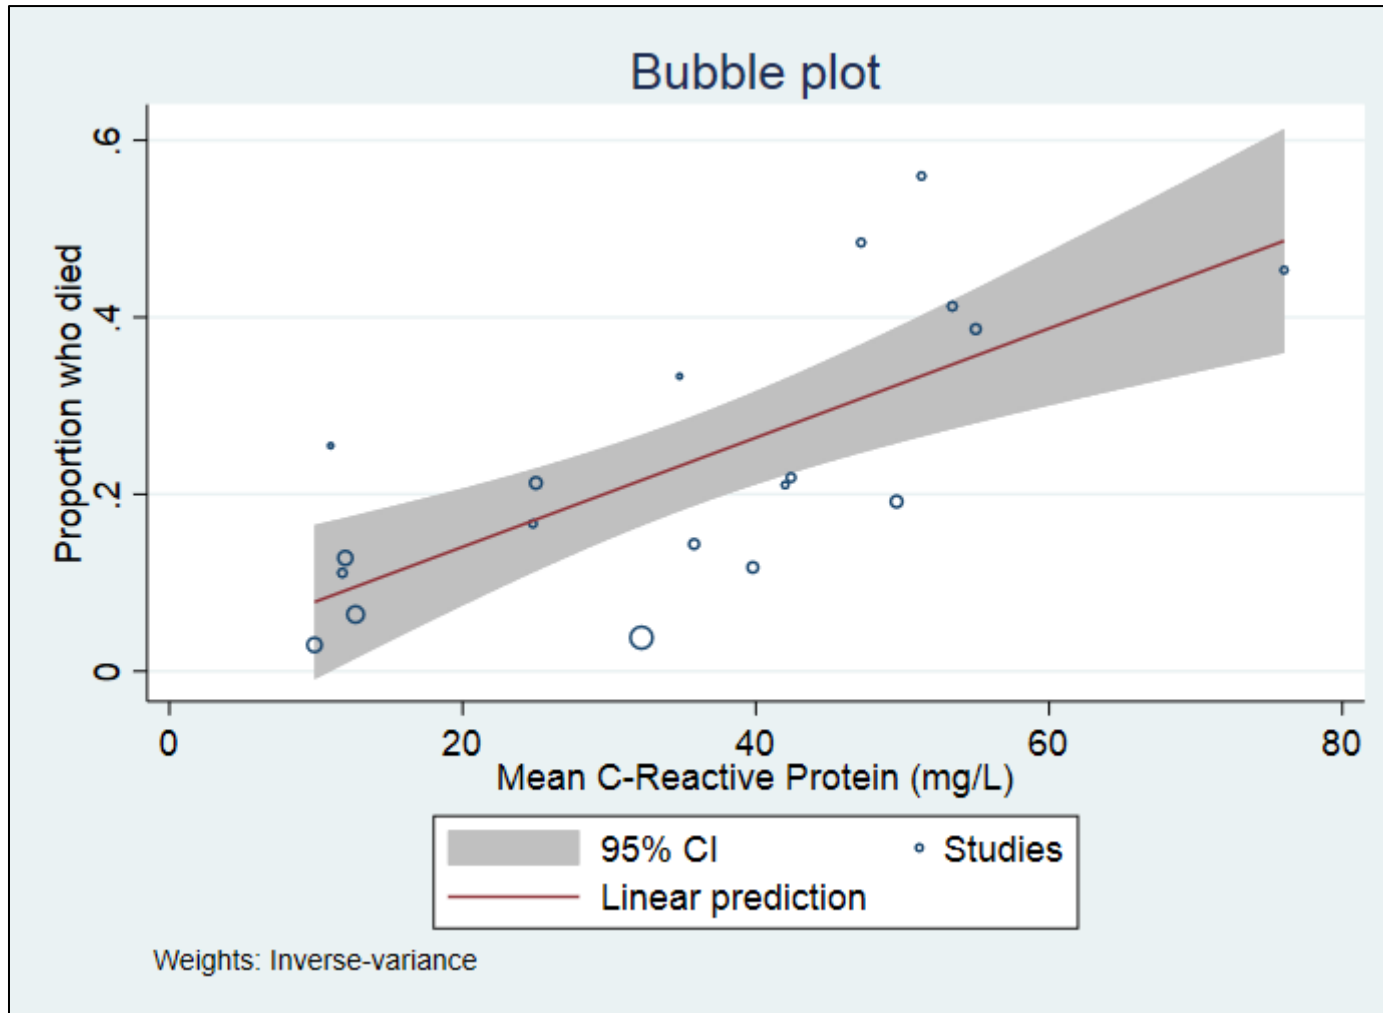

eFigure 150 Percentage change in mortality with unit increase in mean D dimer

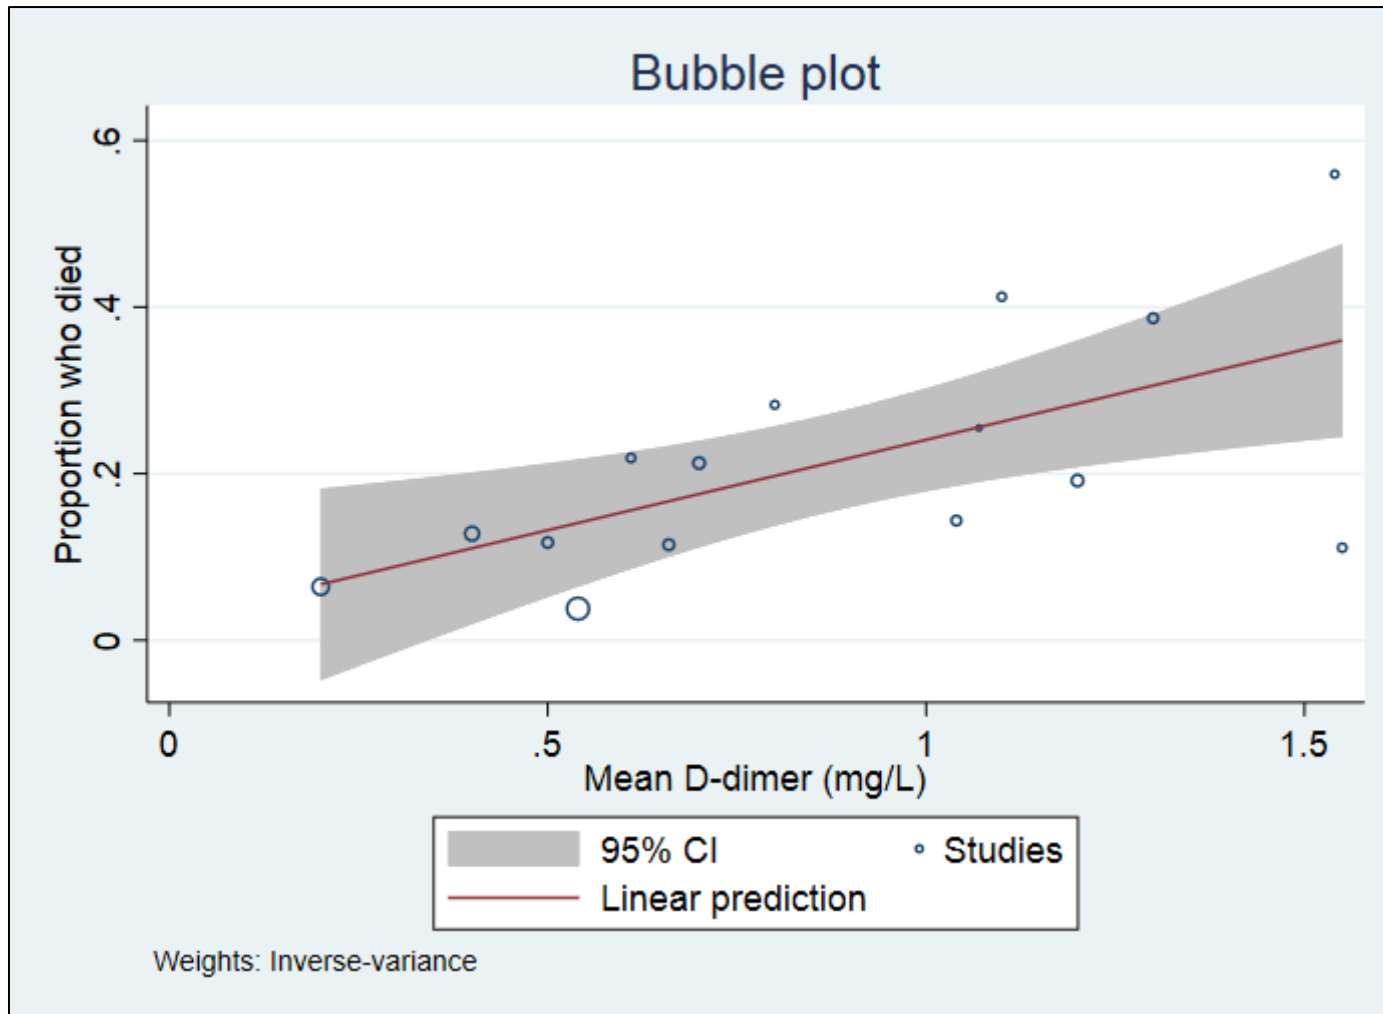

eFigure 151 Percentage change in mortality with unit increase in mean Pro-calcitonin

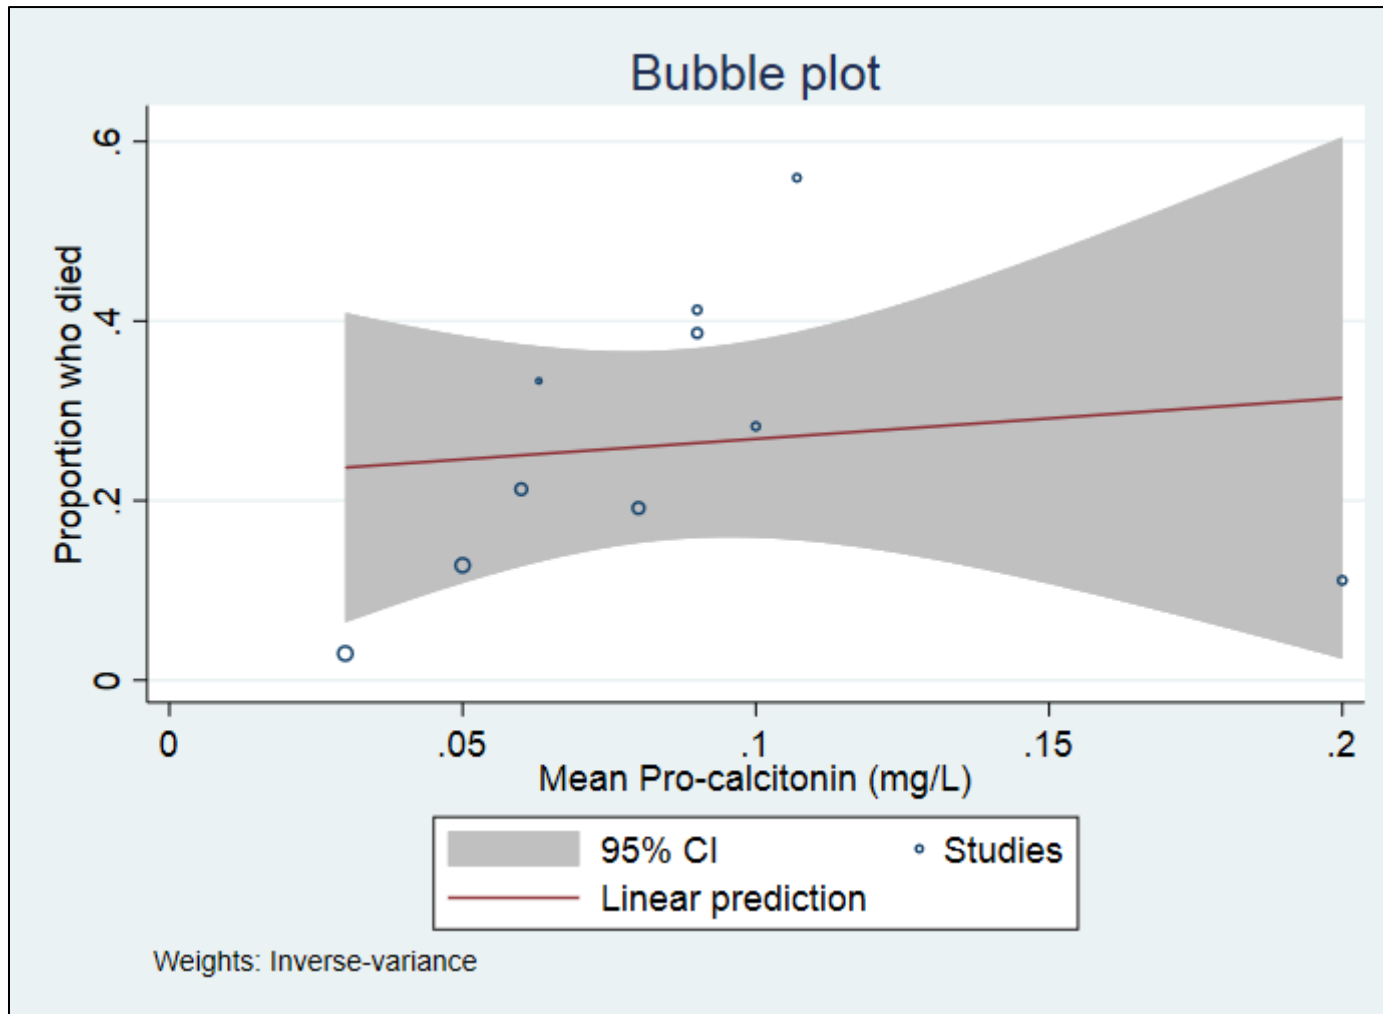

eFigure 152 Percentage change in mortality with unit increase in mean serum ferritin

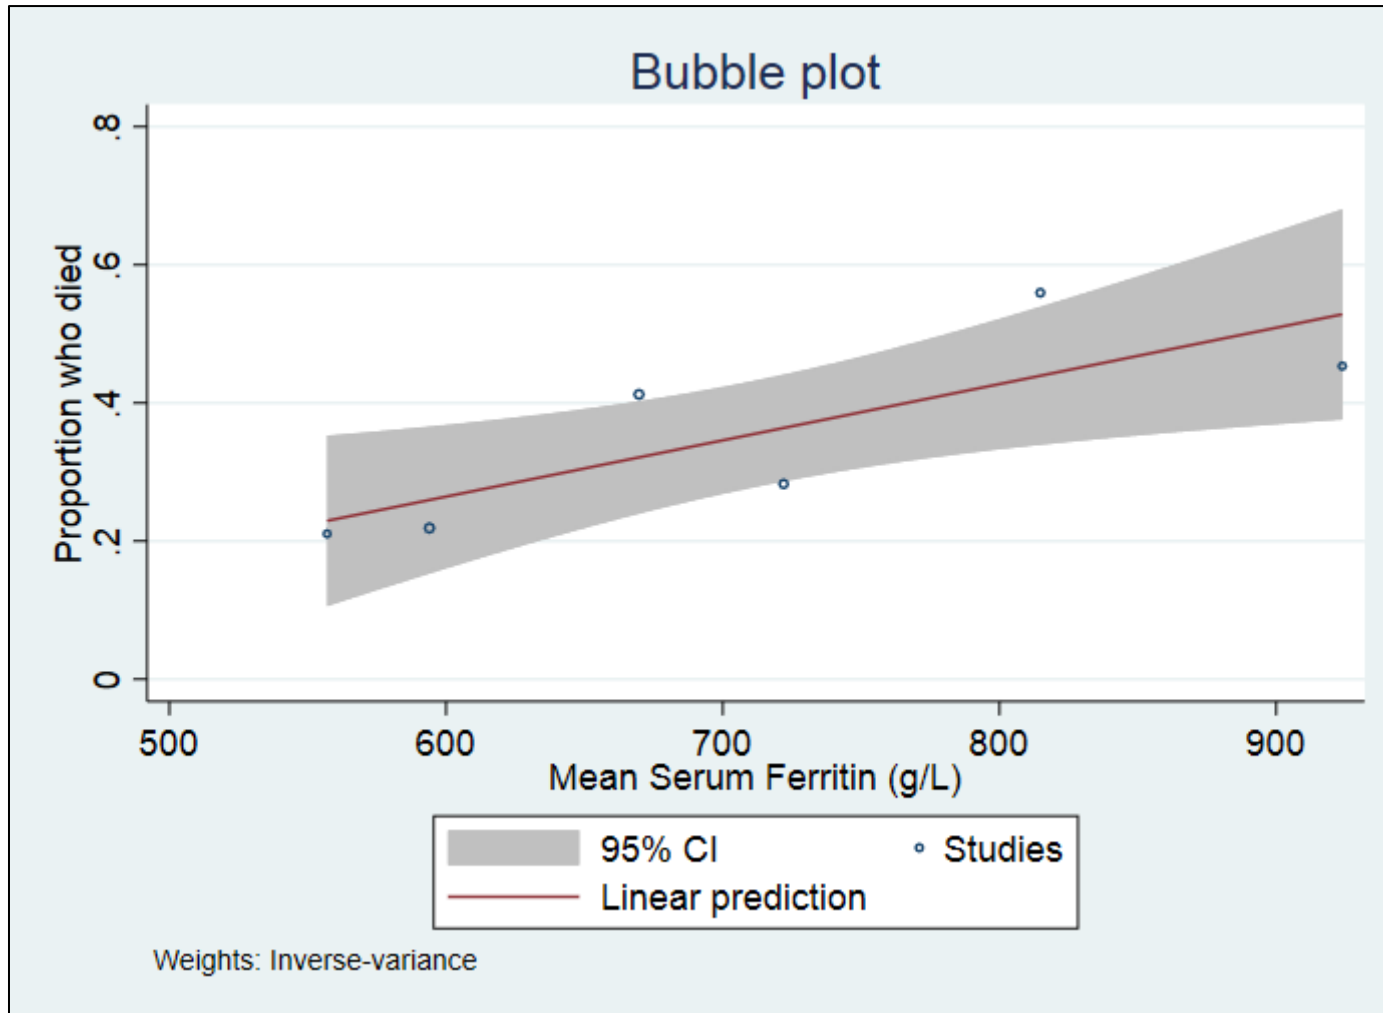

eFigure 153 Percentage change in mortality with unit increase in mean serum LDH

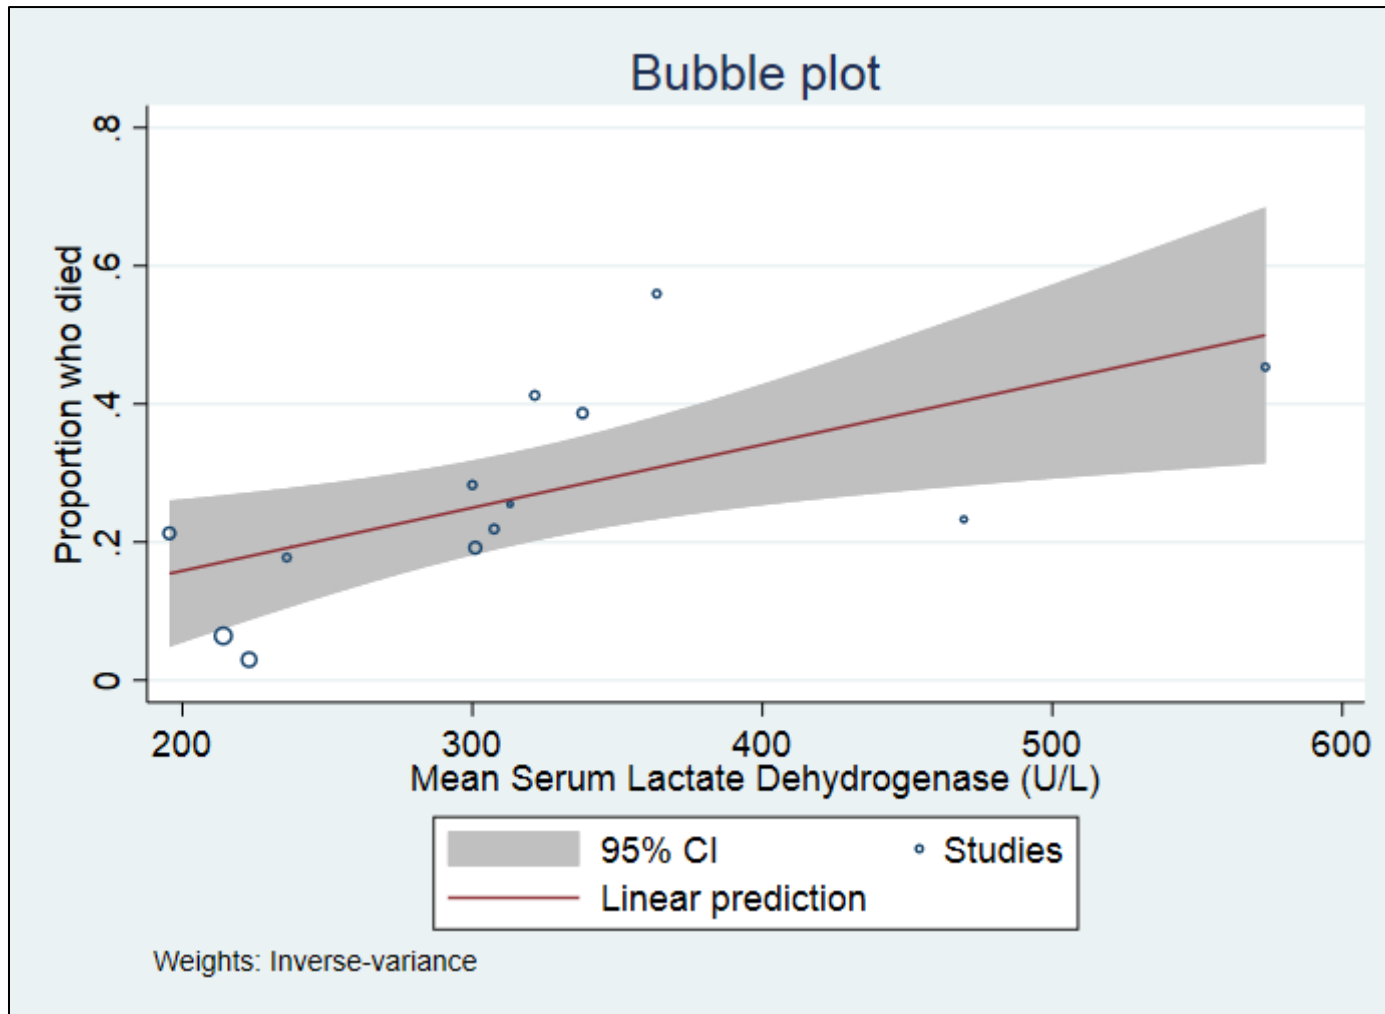



eFigure 154 Percentage change in mortality with unit increase in mean a) Serum creatinine b) Serum creatinine excluding critical patients

154a

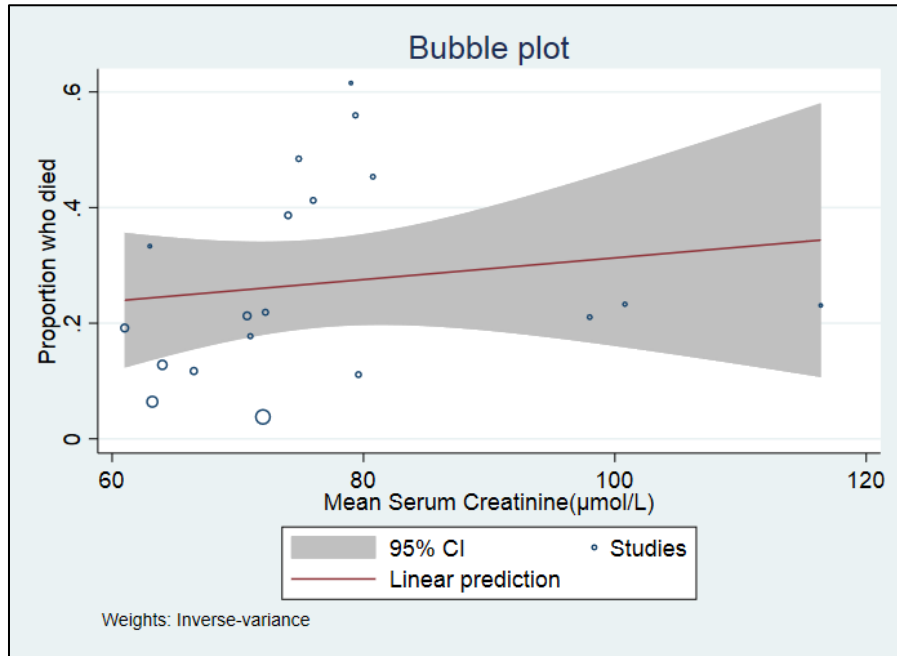

154b

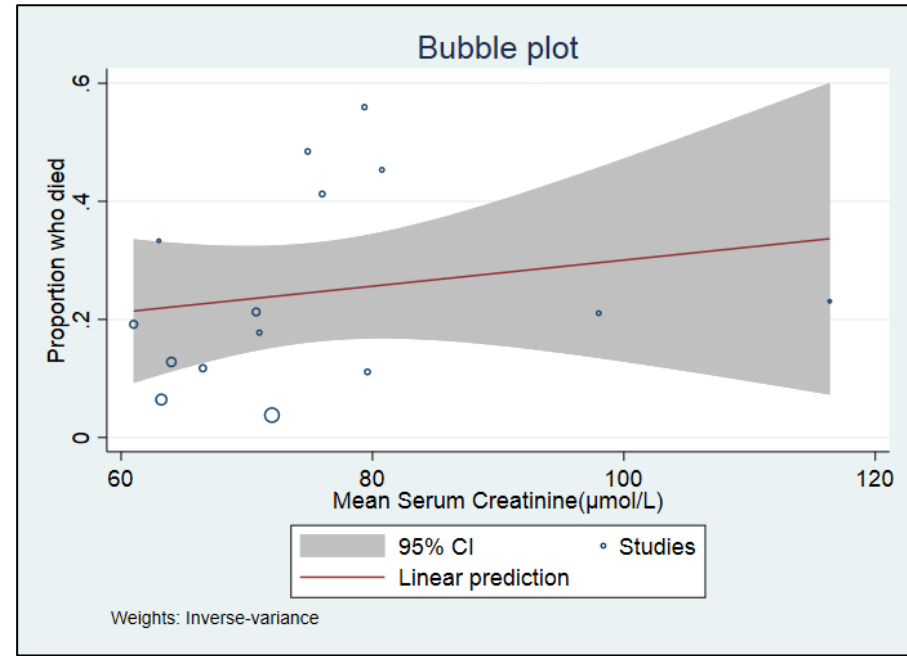

eFigure 155 Percentage change in mortality with unit increase in mean BUN

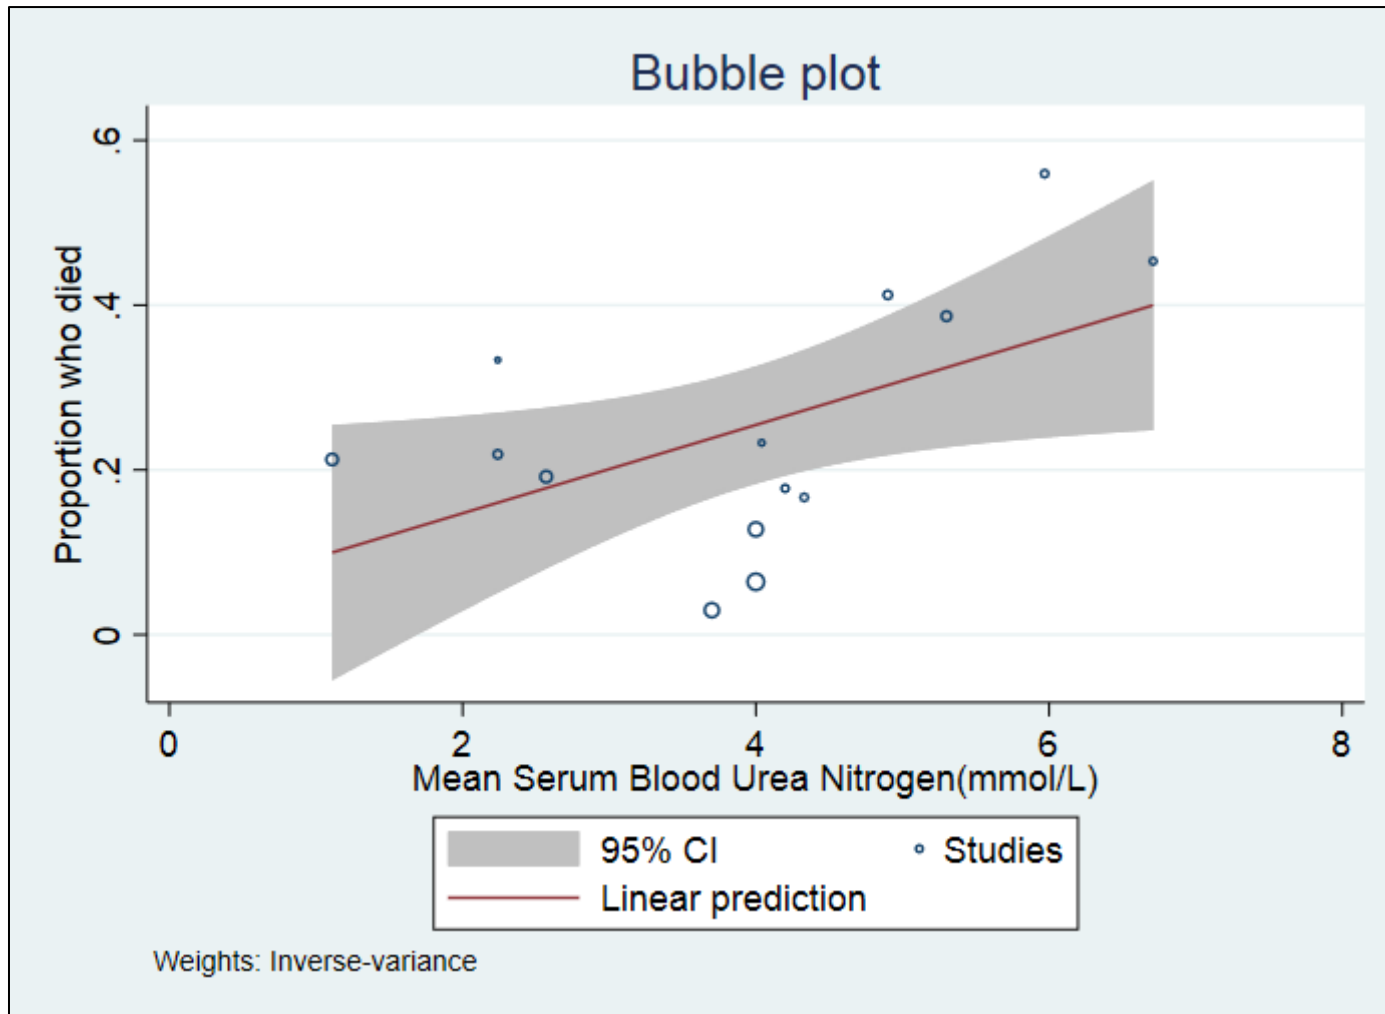

eFigure 156 Percentage change in mortality with unit increase in mean total bilirubin

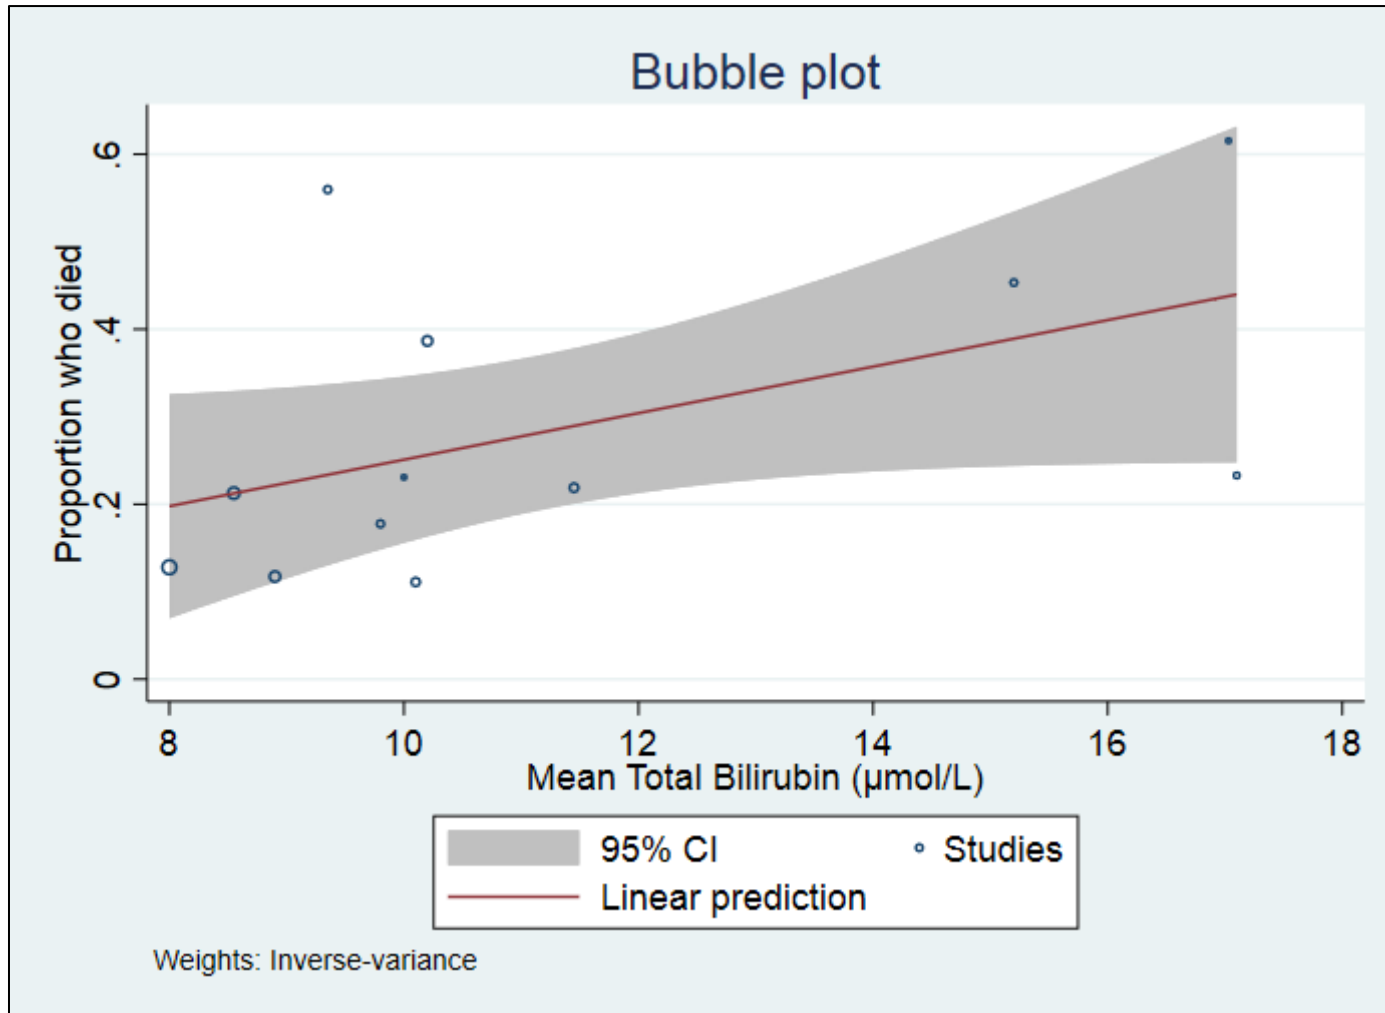

eFigure 157 Percentage change in mortality with unit increase in mean albumin

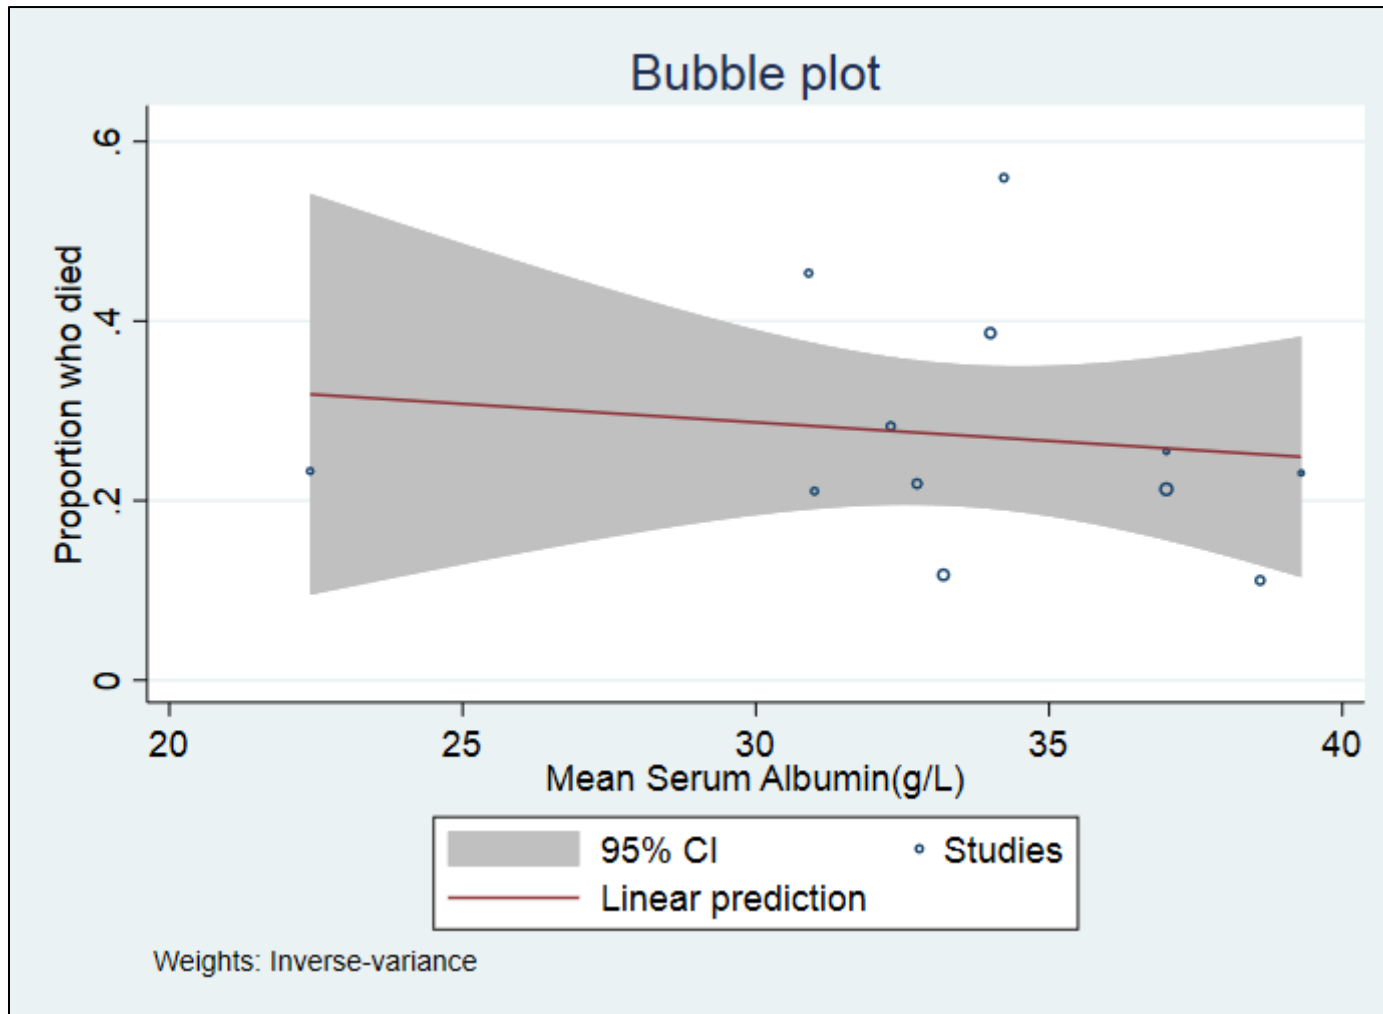

eFigure 158 Percentage change in mortality with unit increase in mean AST

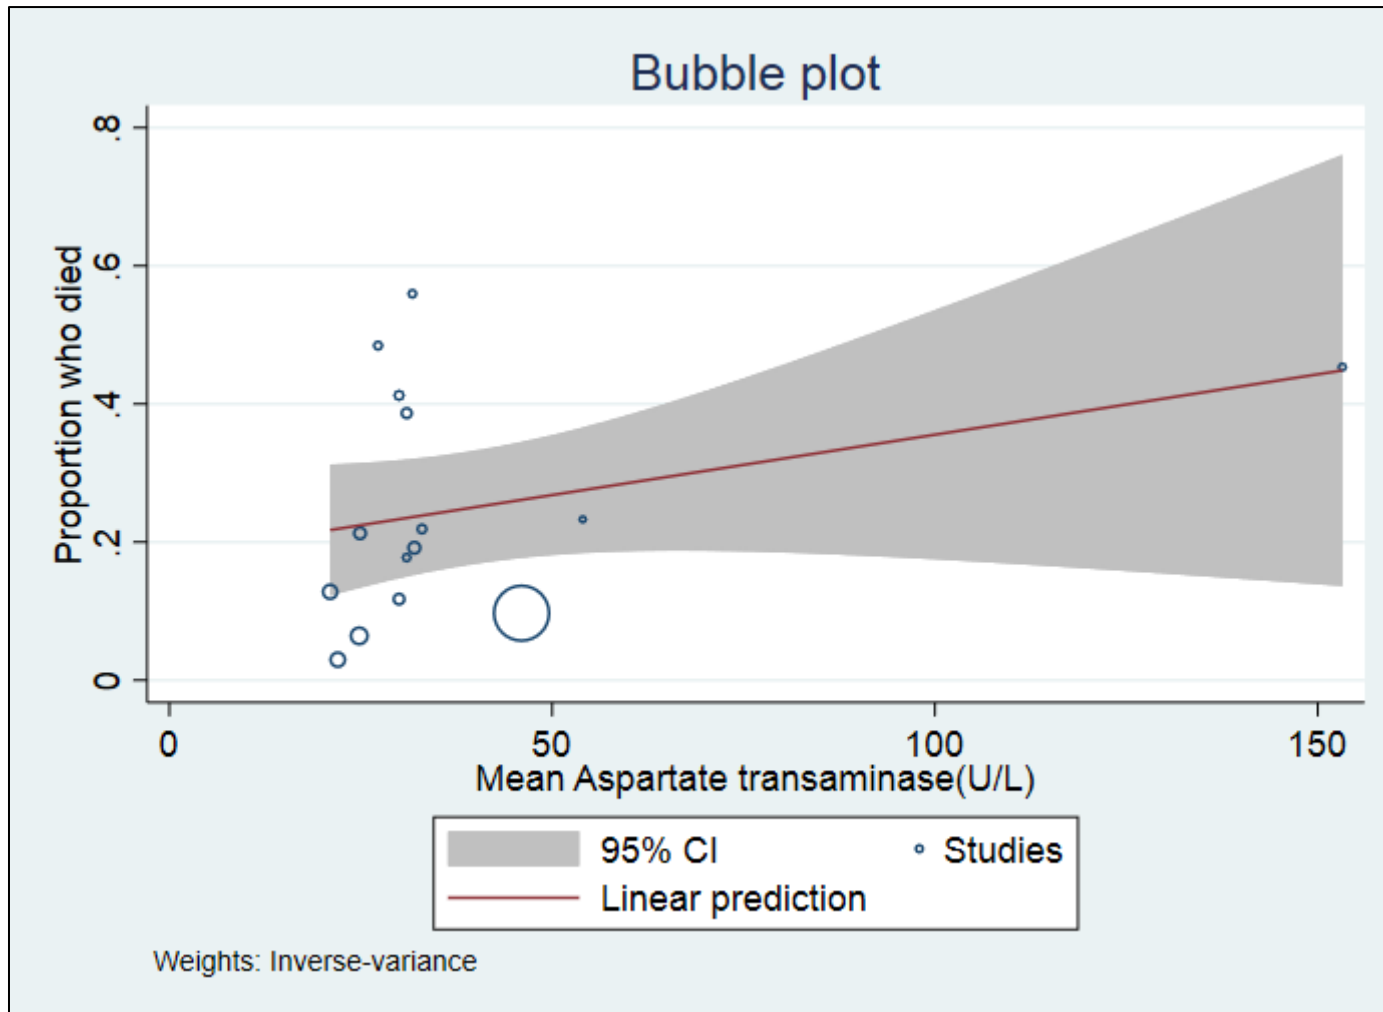

eFigure 159 Percentage change in mortality with unit increase in mean ALT

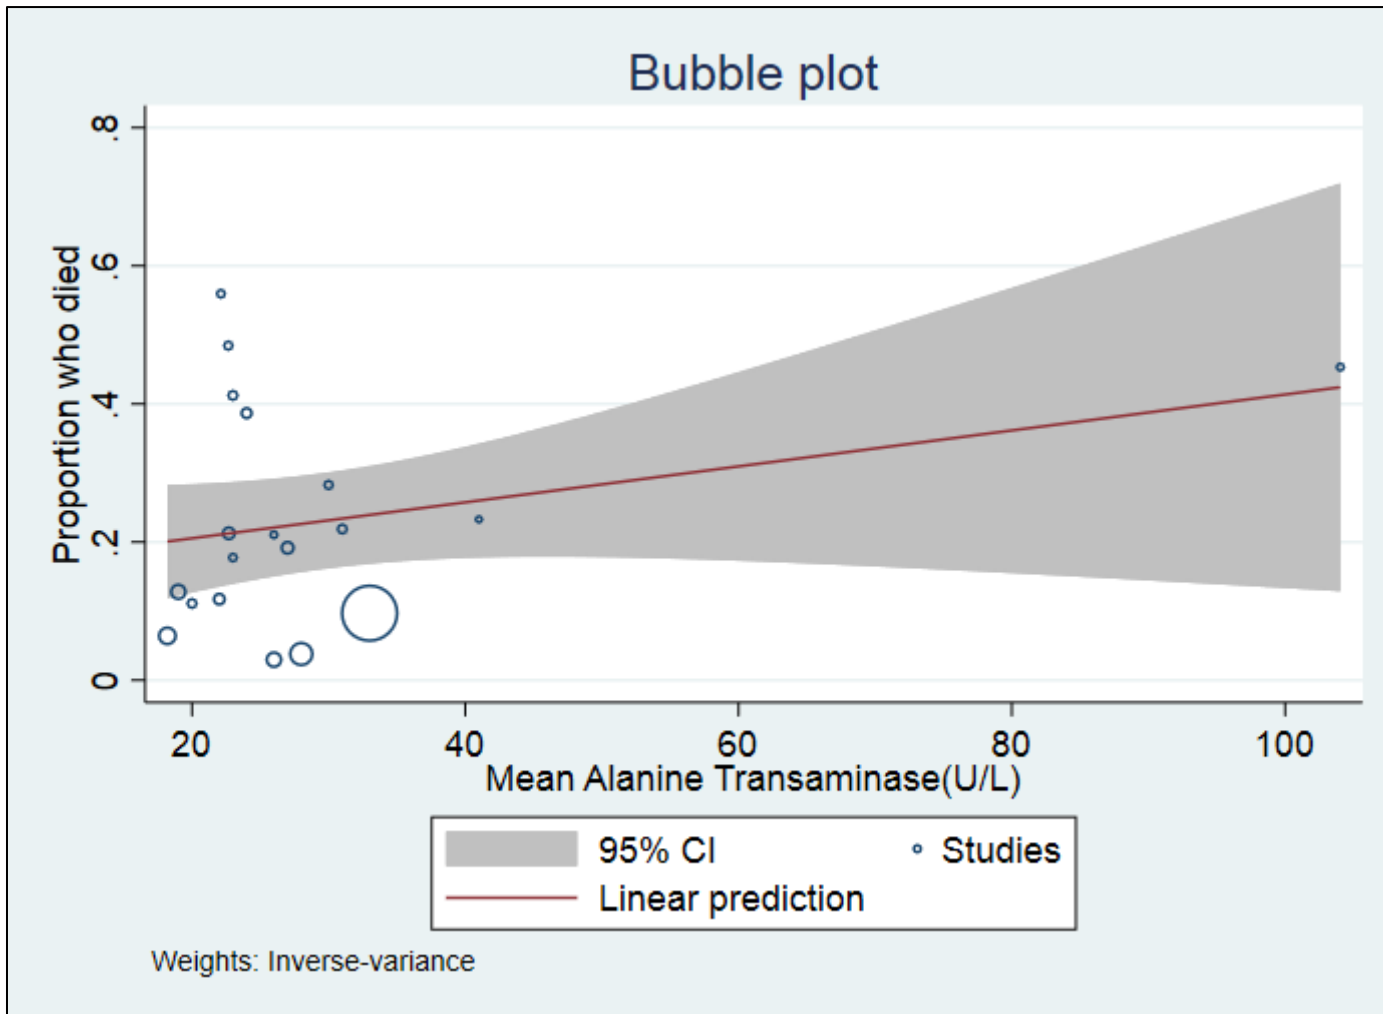

eFigure 160 Percentage change in mortality with unit increase in mean CK Total

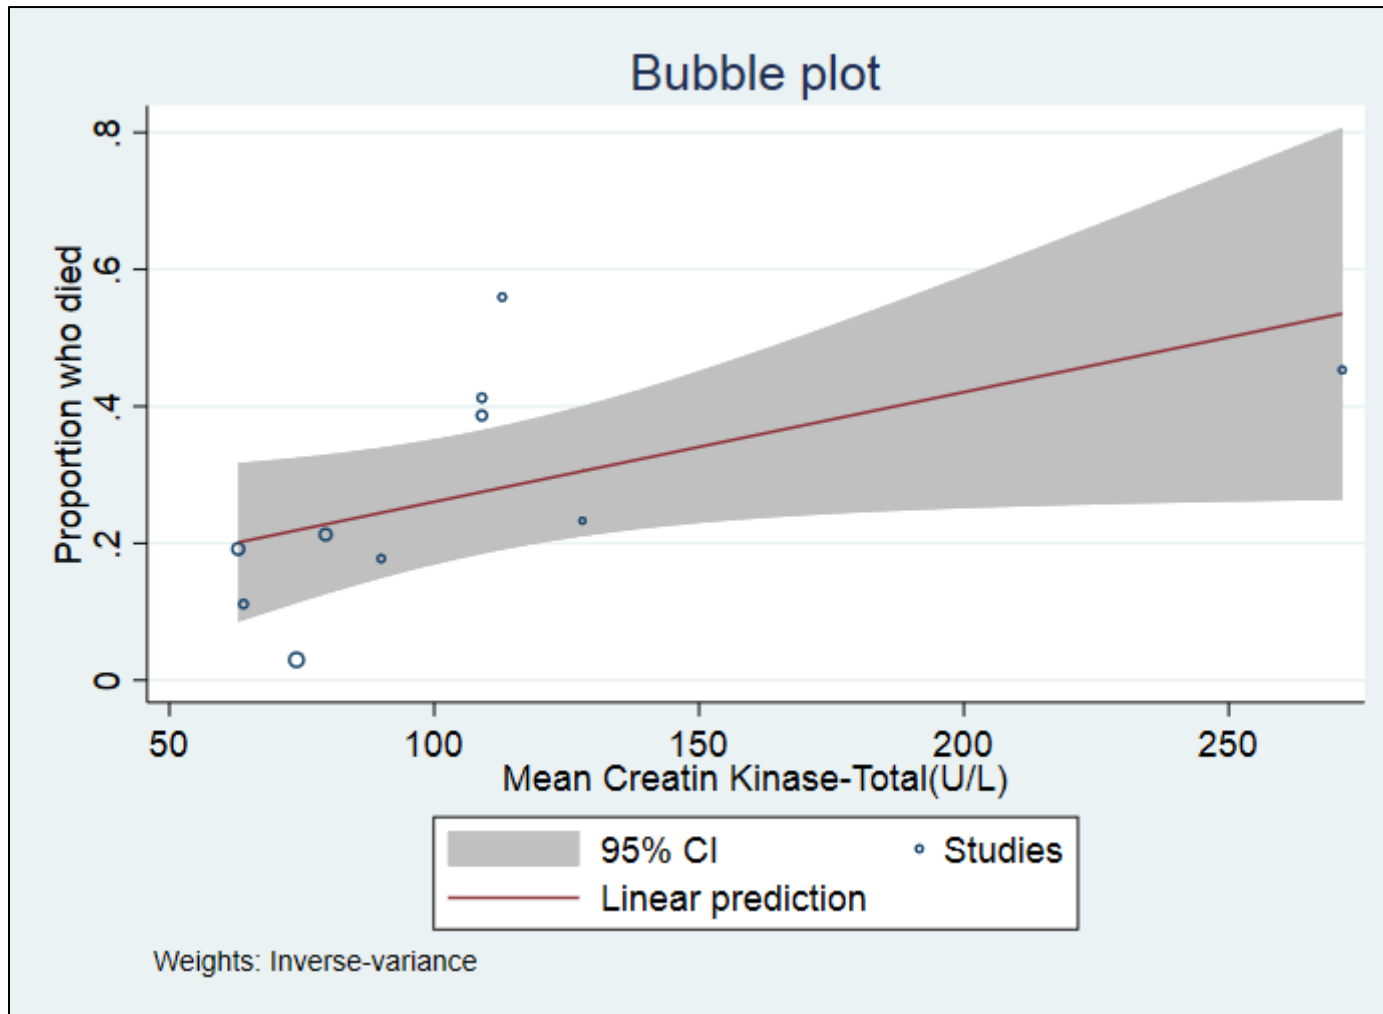

eFigure 161 Percentage change in mortality with unit increase in mean IL6

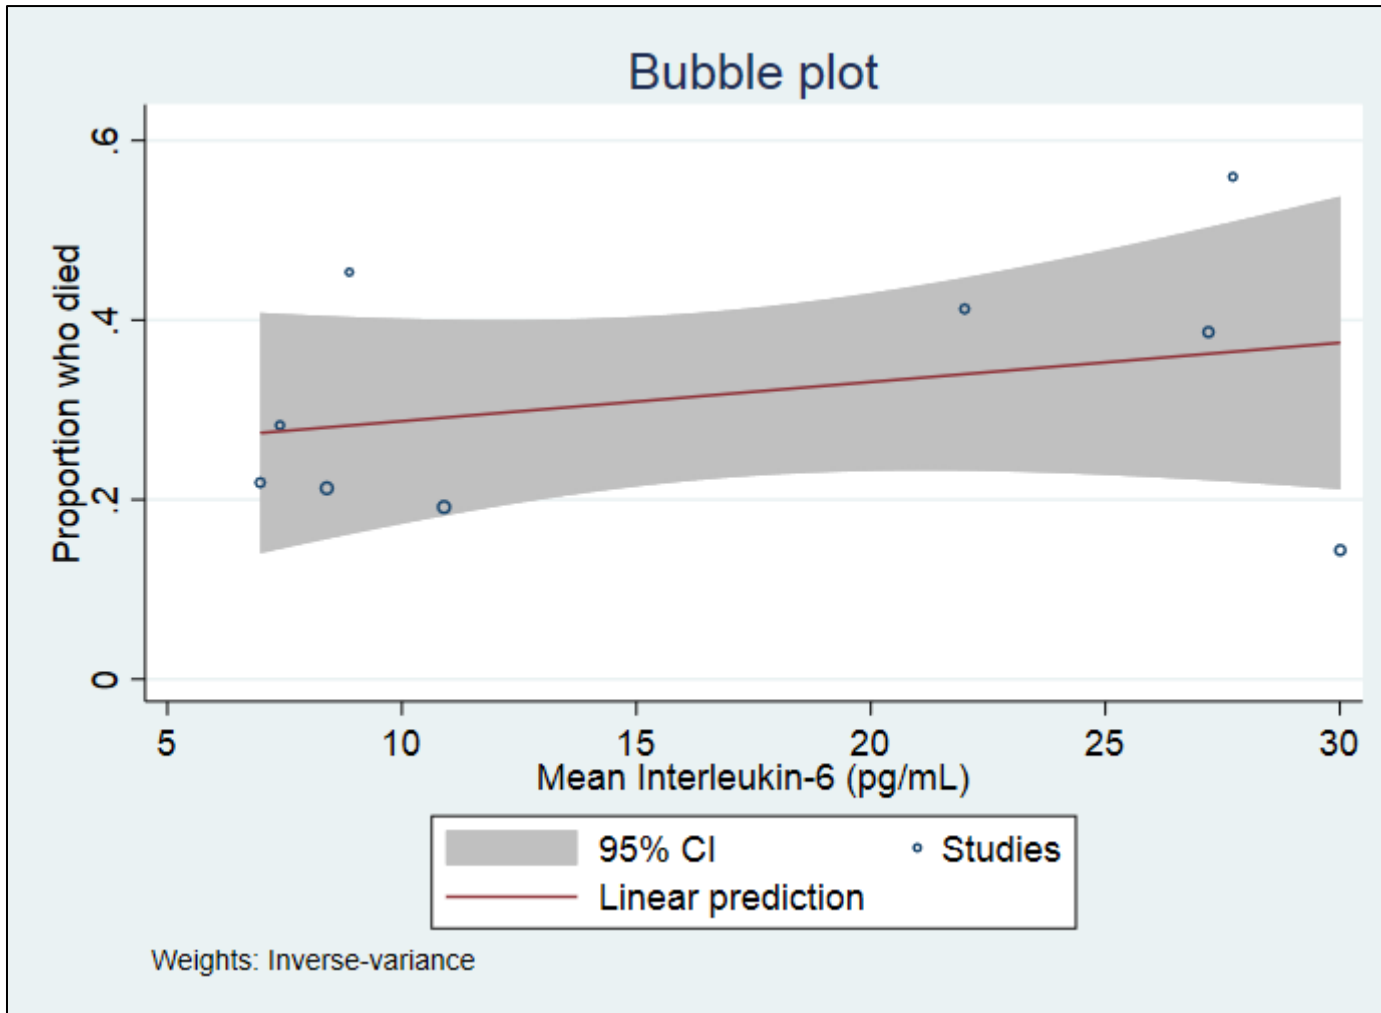



eFigure 162 Percentage change in severe disease with unit increase in mean age

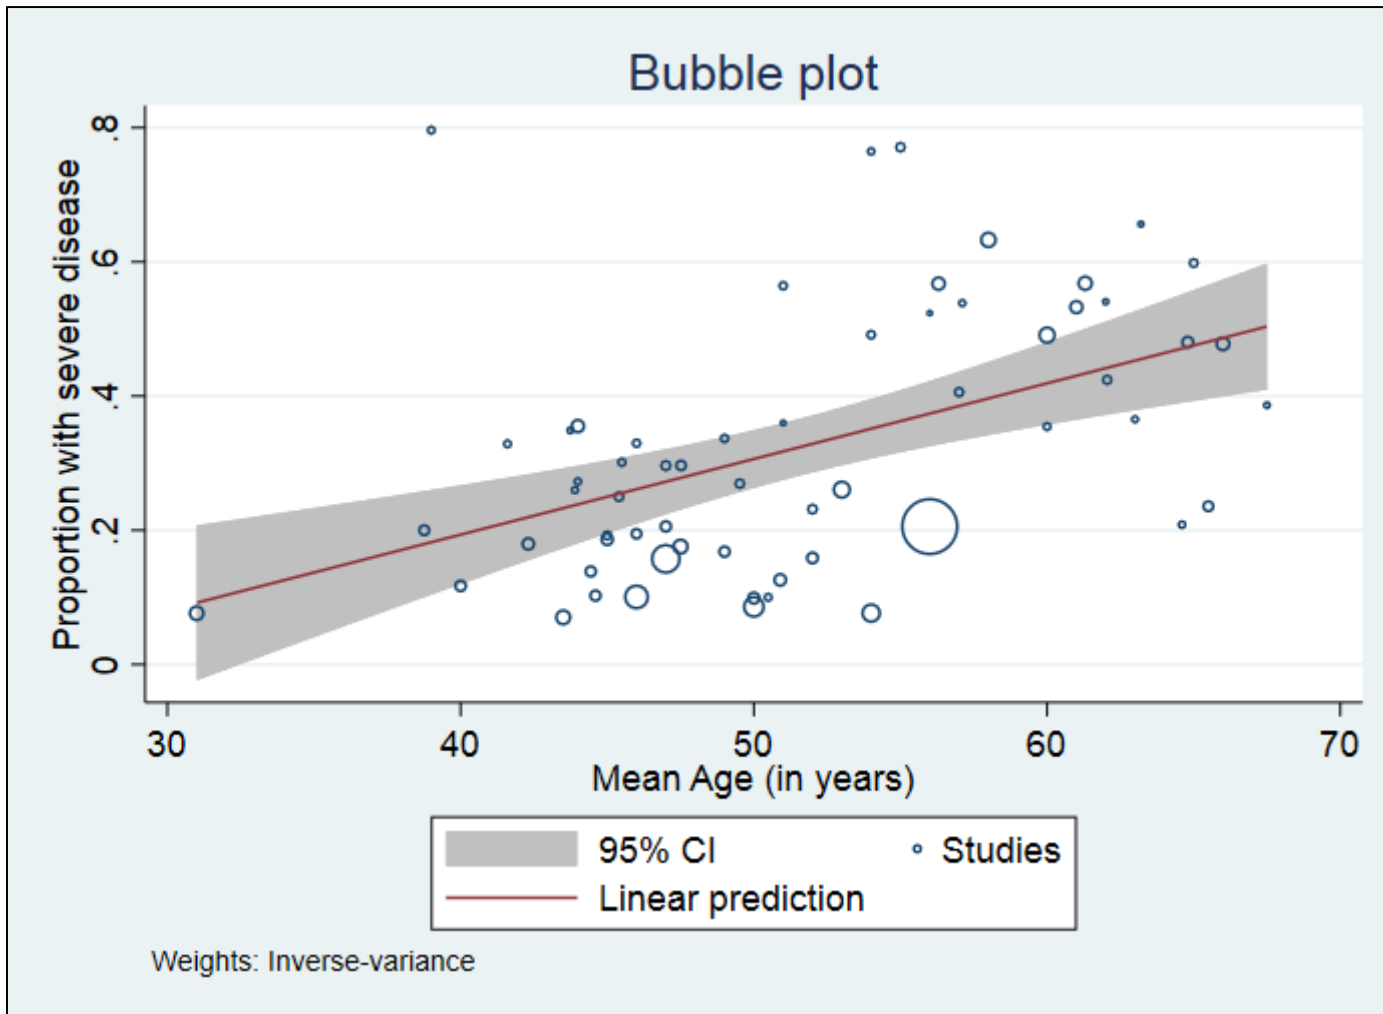

eFigure 163 Percentage change in severe disease with unit increase in mean Hb

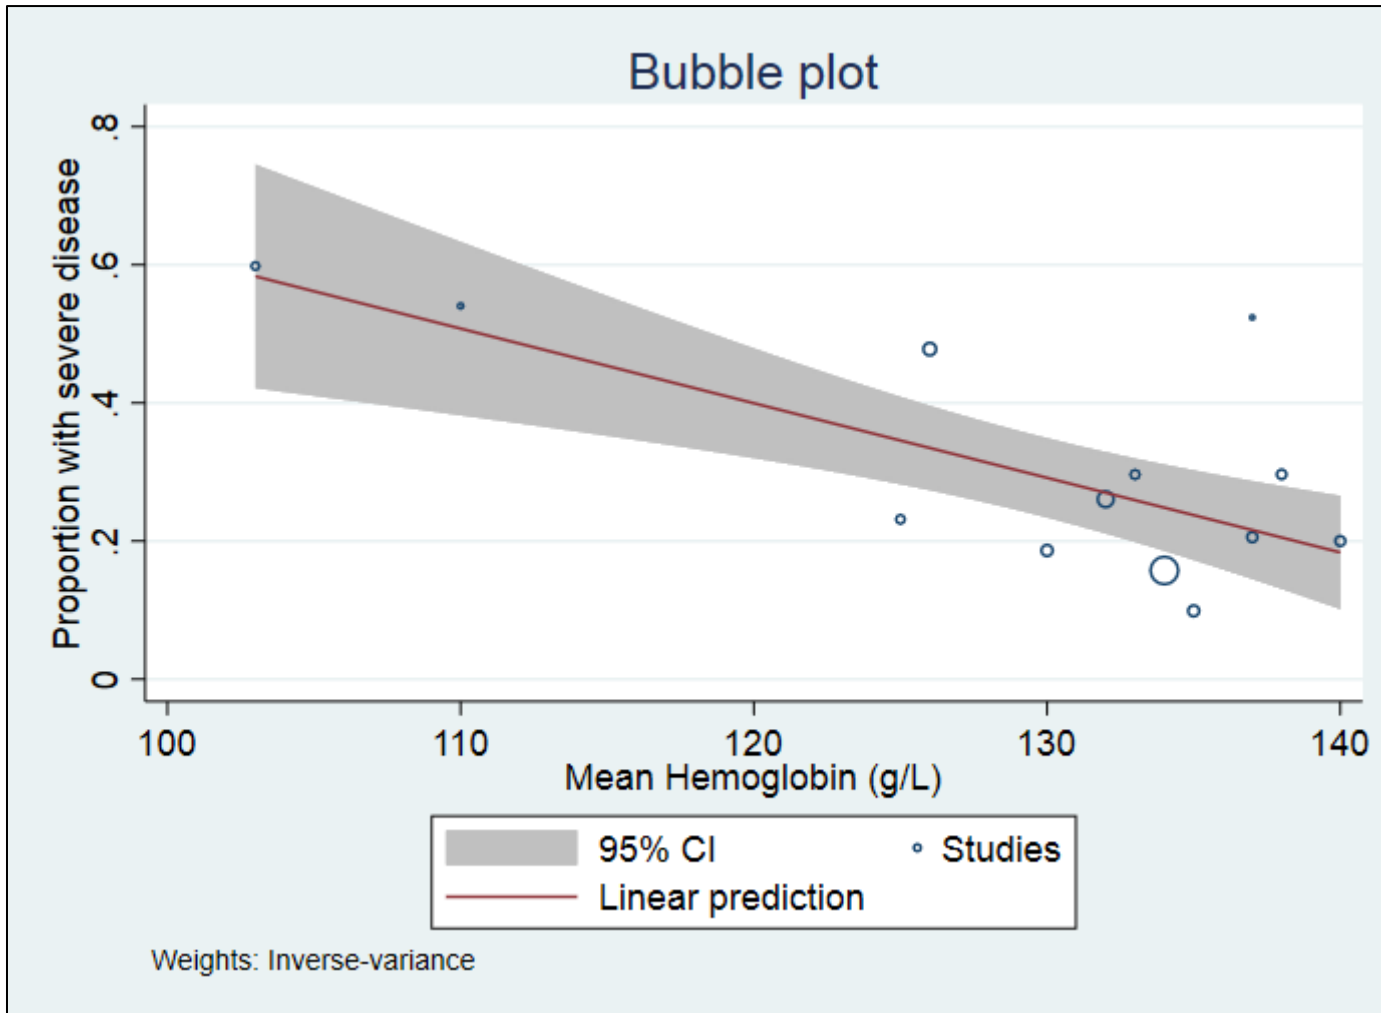

eFigure 164 Percentage change in severe disease with unit increase in mean Total Leukocyte count

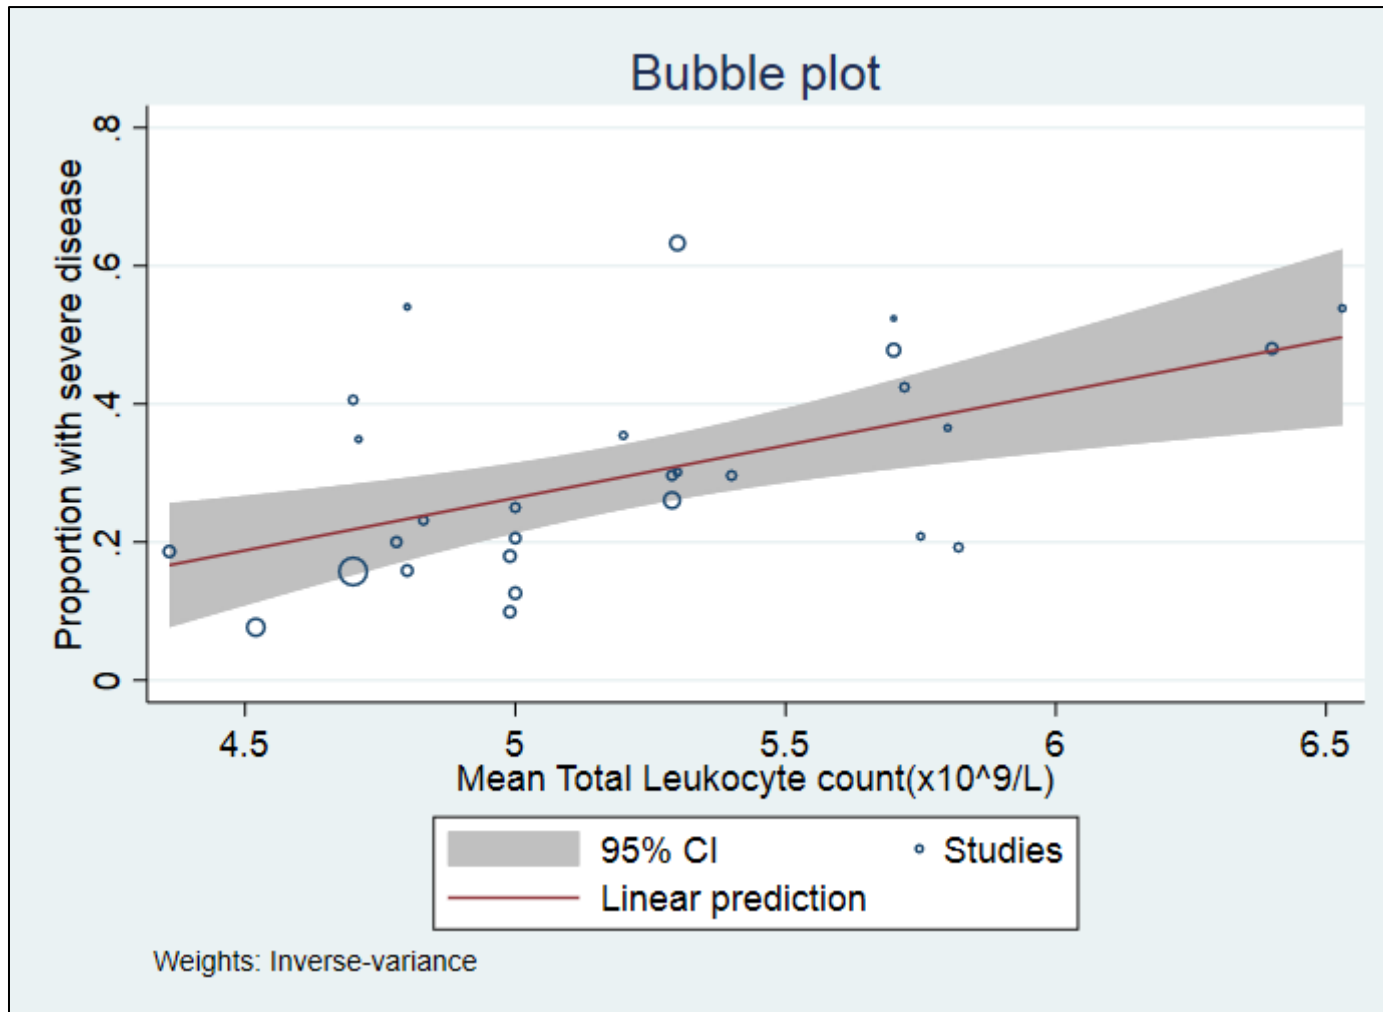

eFigure 165 Percentage change in severe disease with unit increase in mean Lymphocyte count

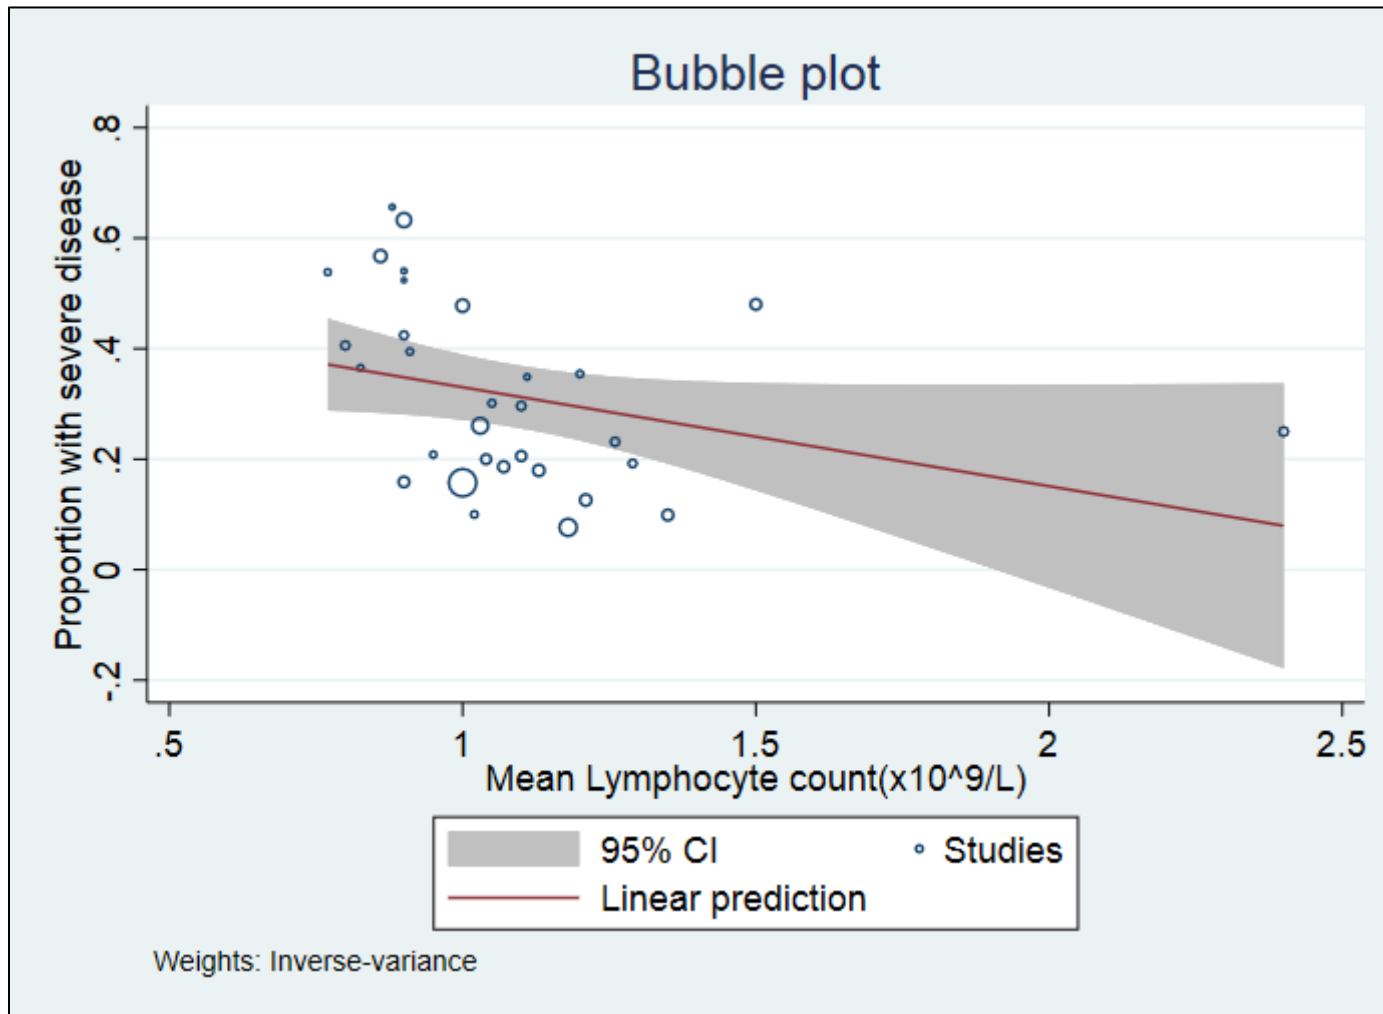

eFigure 166 Percentage change in severe disease with unit increase in mean Neutrophil count

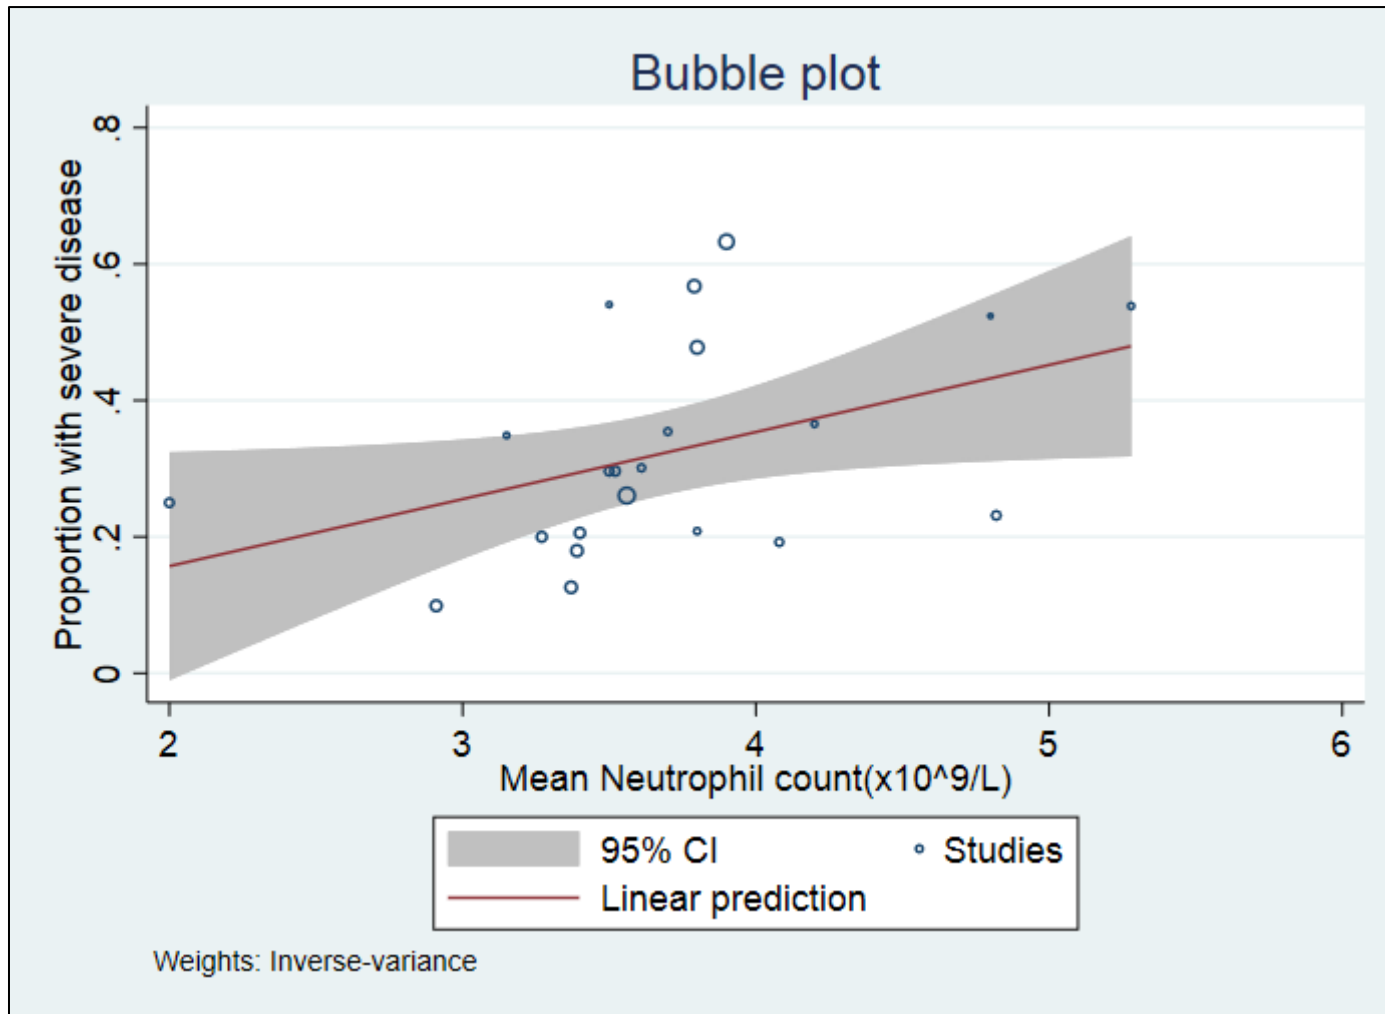

eFigure 167 Percentage change in severe disease with unit increase in mean platelet count

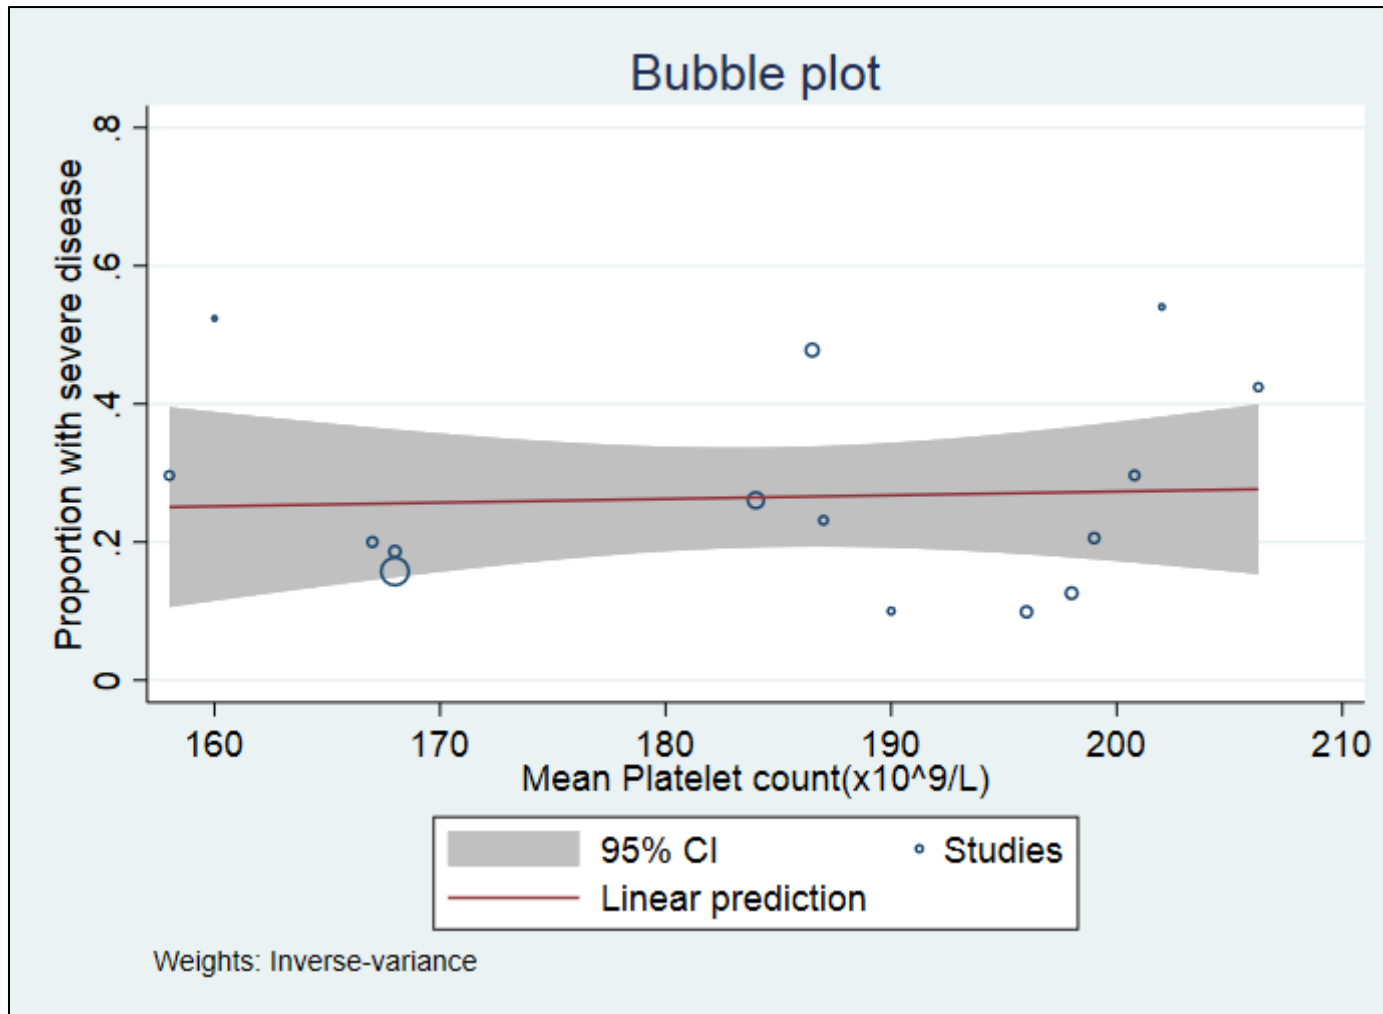

eFigure 168 Percentage change in severe disease with unit increase in mean prothrombin time

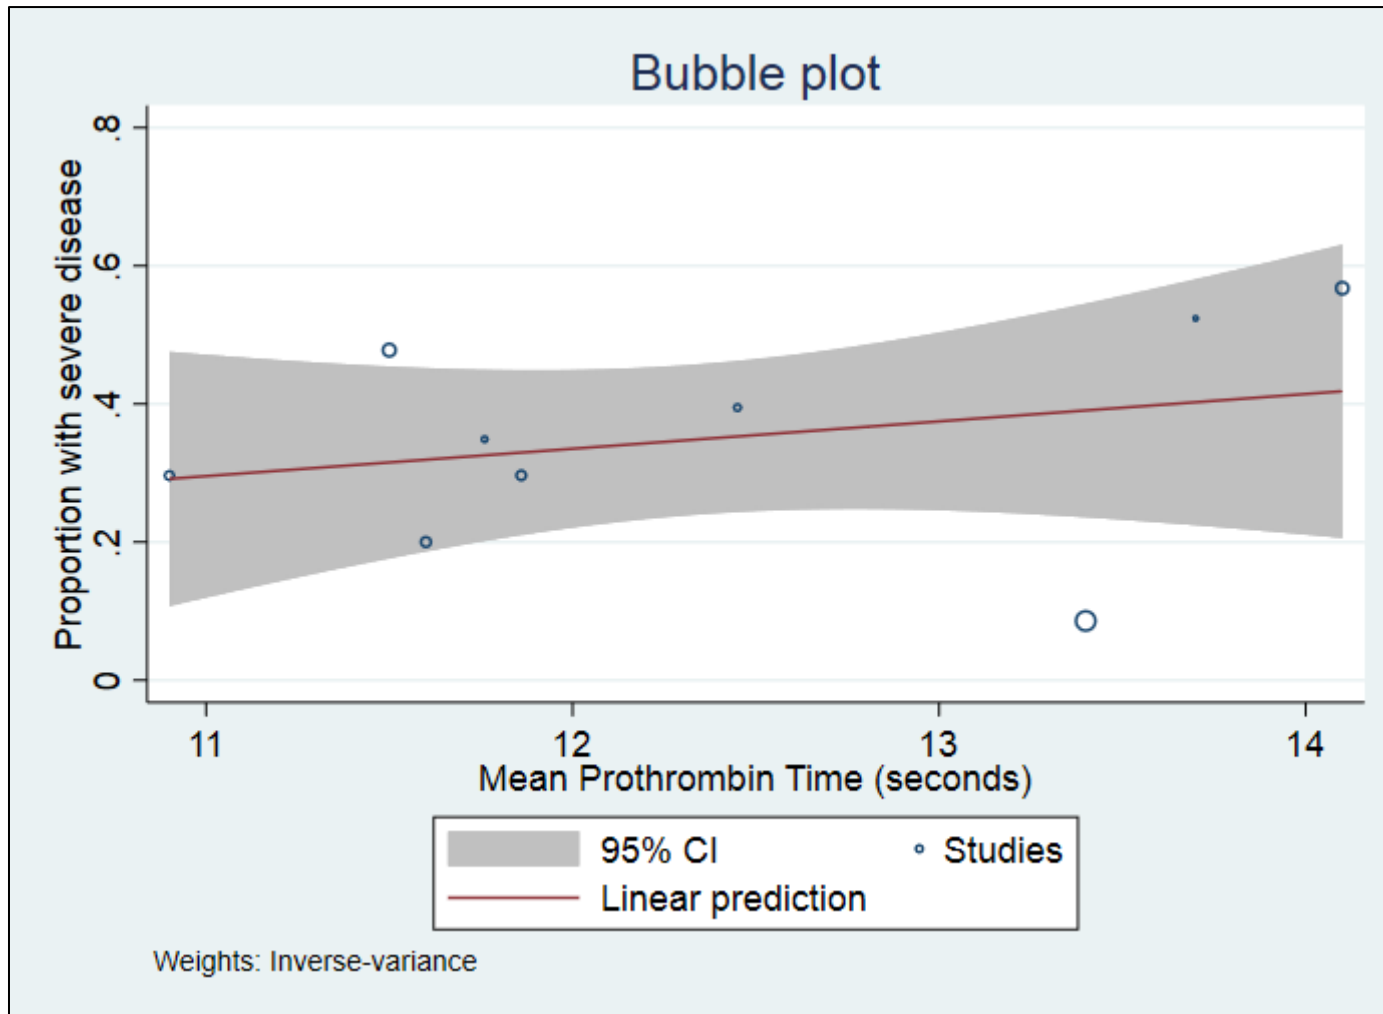

eFigure 169 Percentage change in severe disease with unit increase in mean aPTT

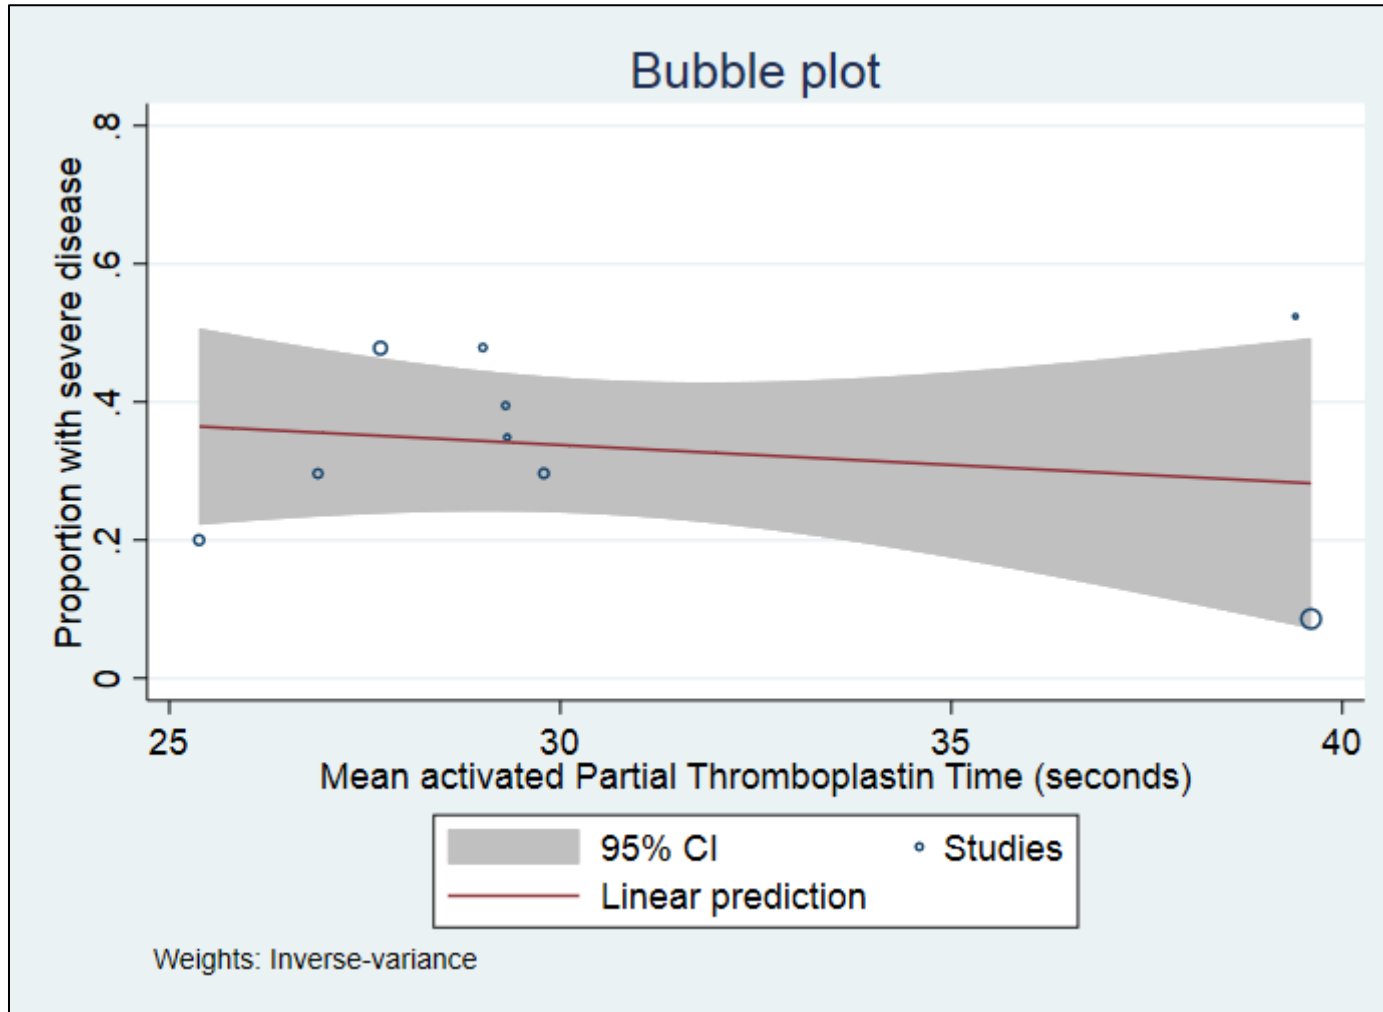



eFigure 170 Percentage change in severe disease with unit increase in mean CRP

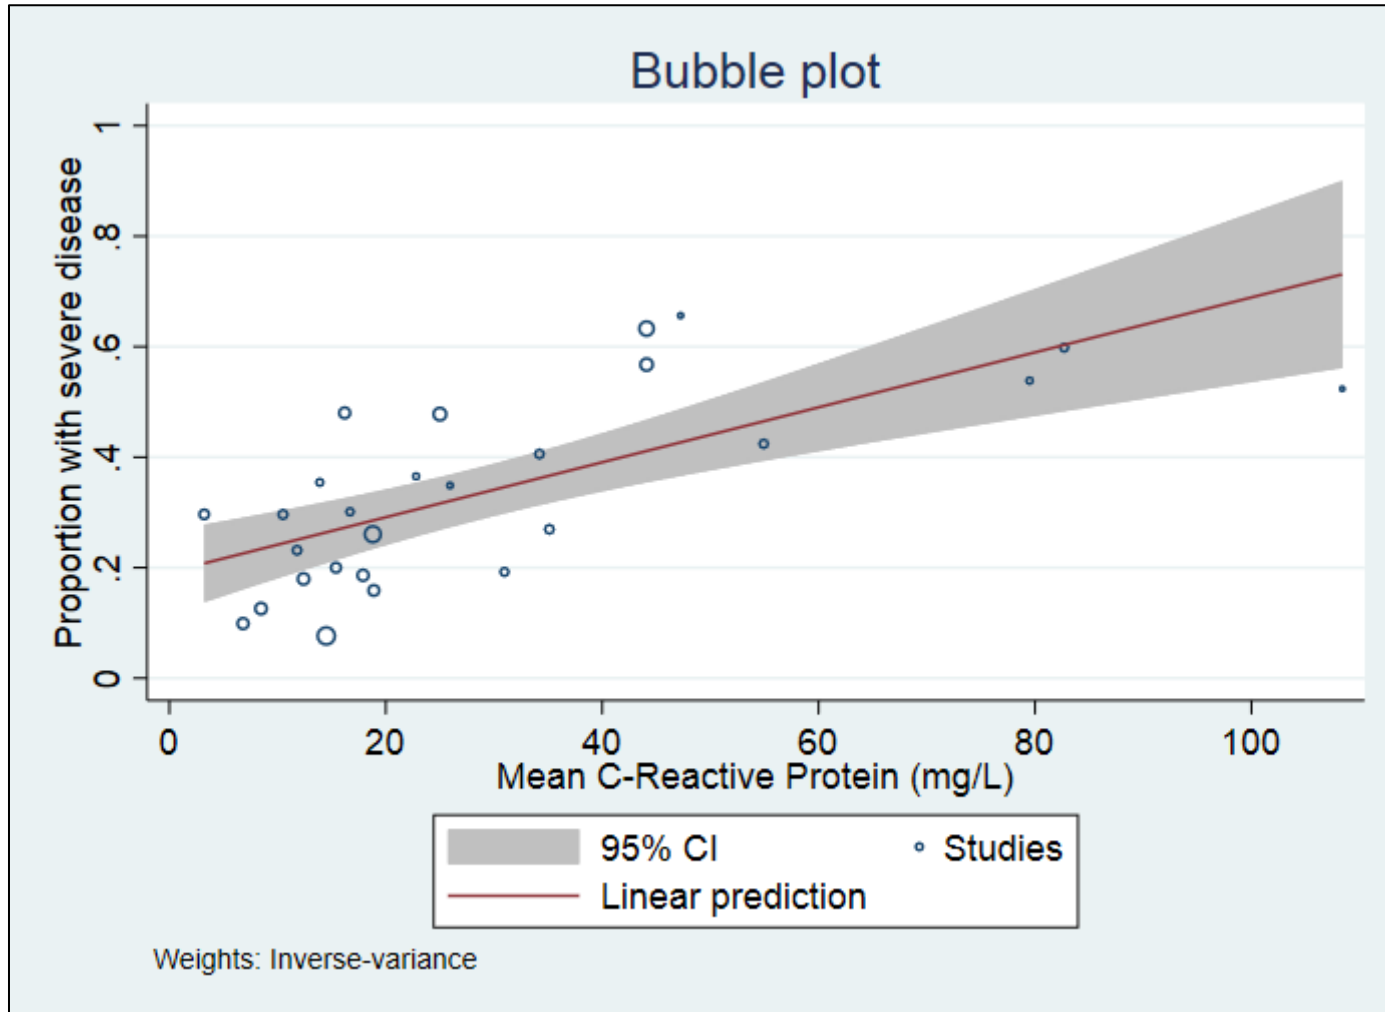

eFigure 171 Percentage change in severe disease with unit increase in mean D Dimer

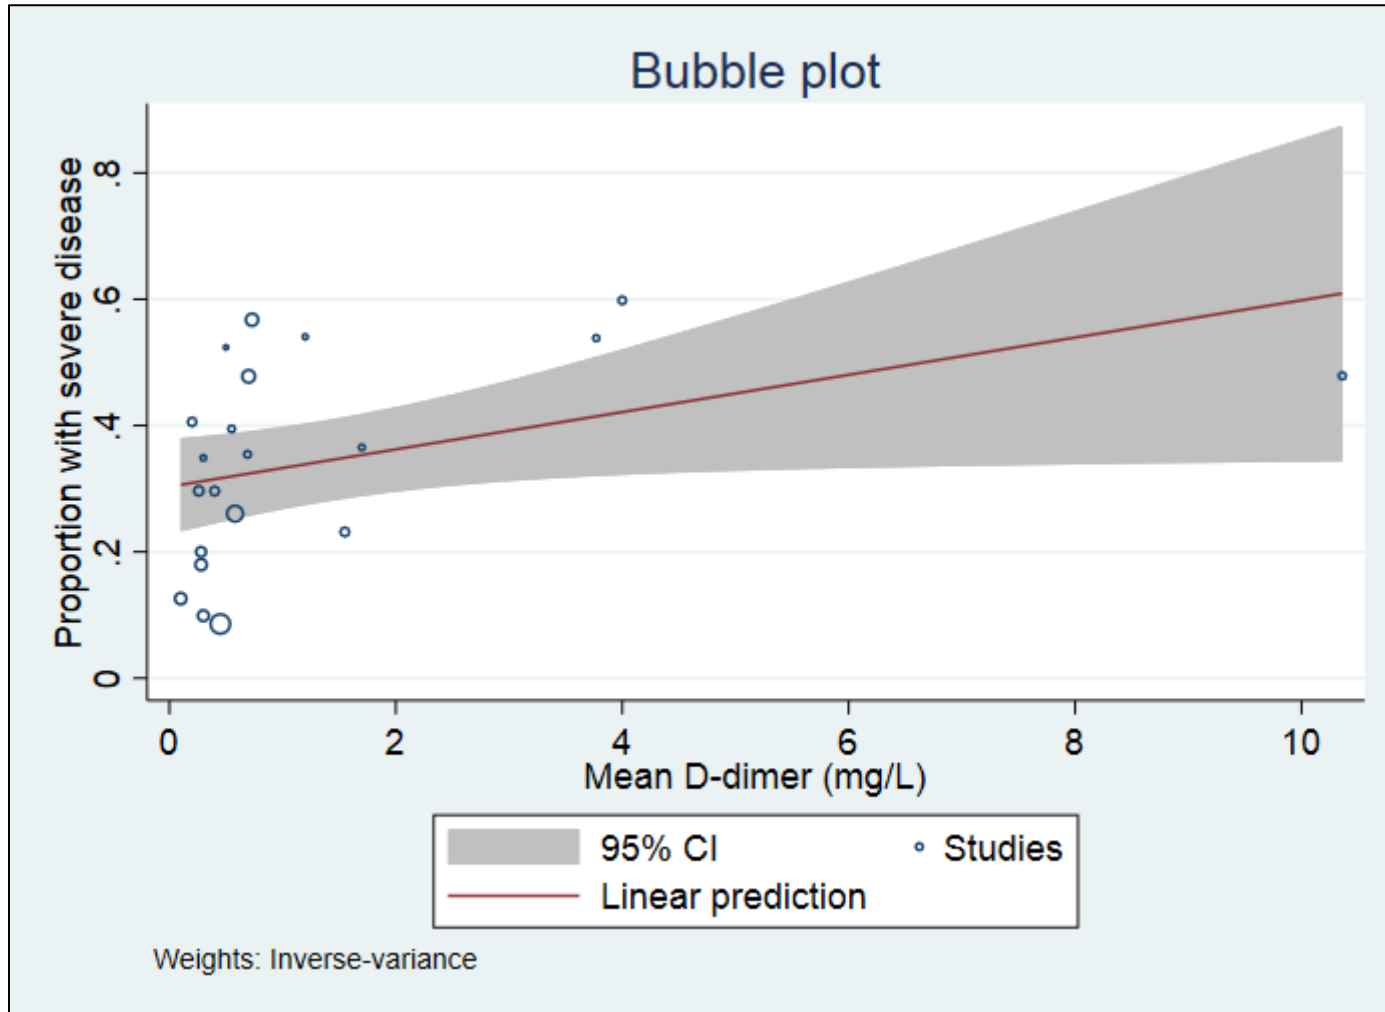

eFigure 172 Percentage change in severe disease with unit increase in mean Pro-calcitonin

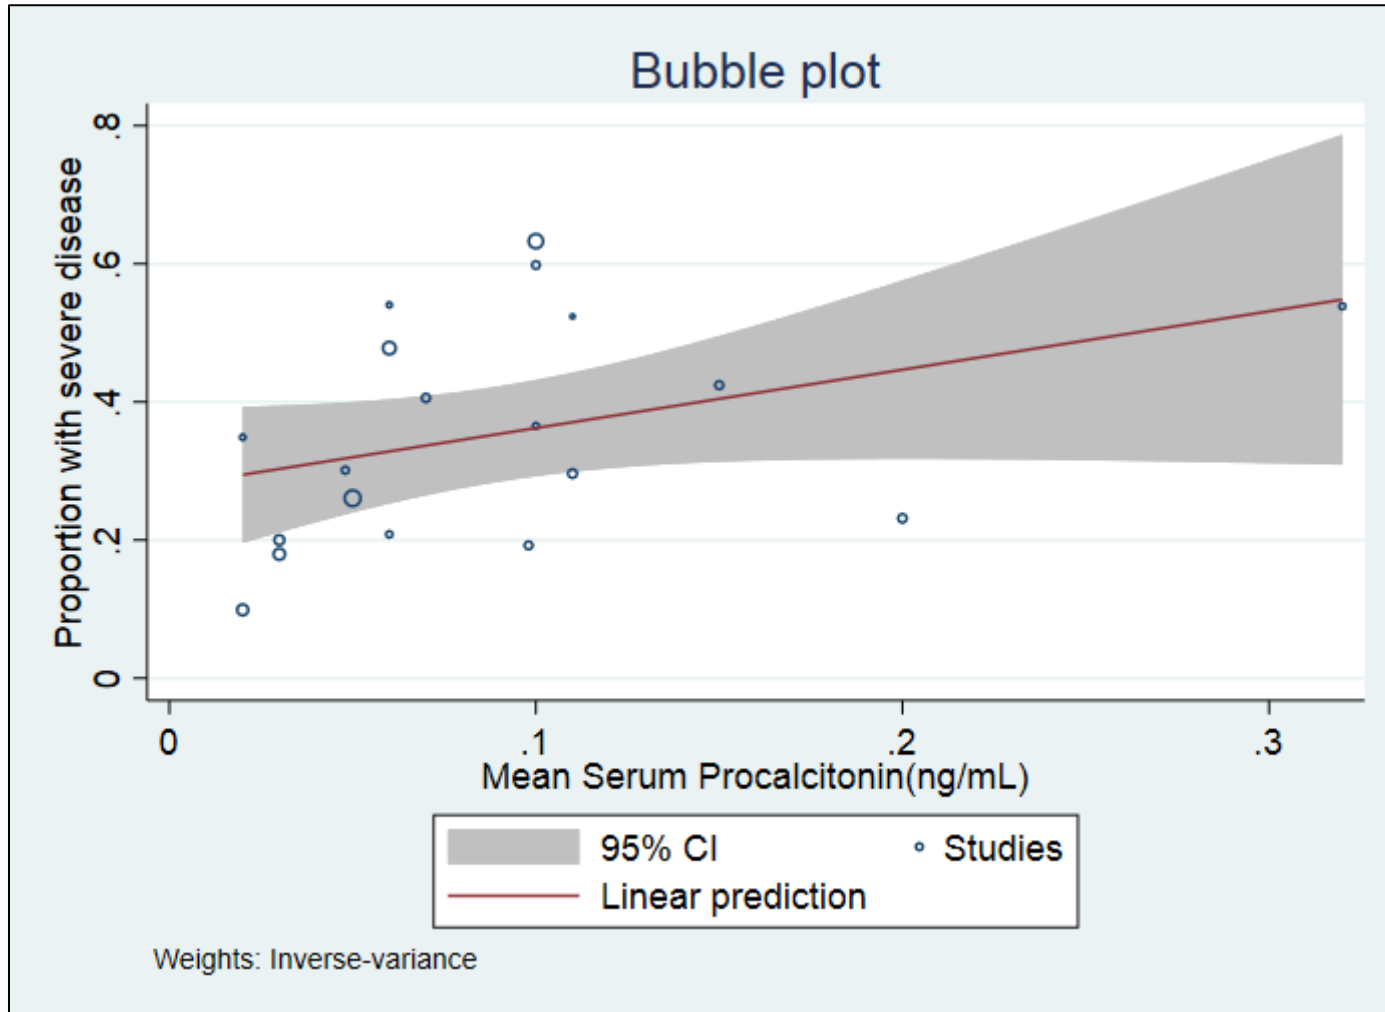

eFigure 173 Percentage change in severe disease with unit increase in mean serum LDH

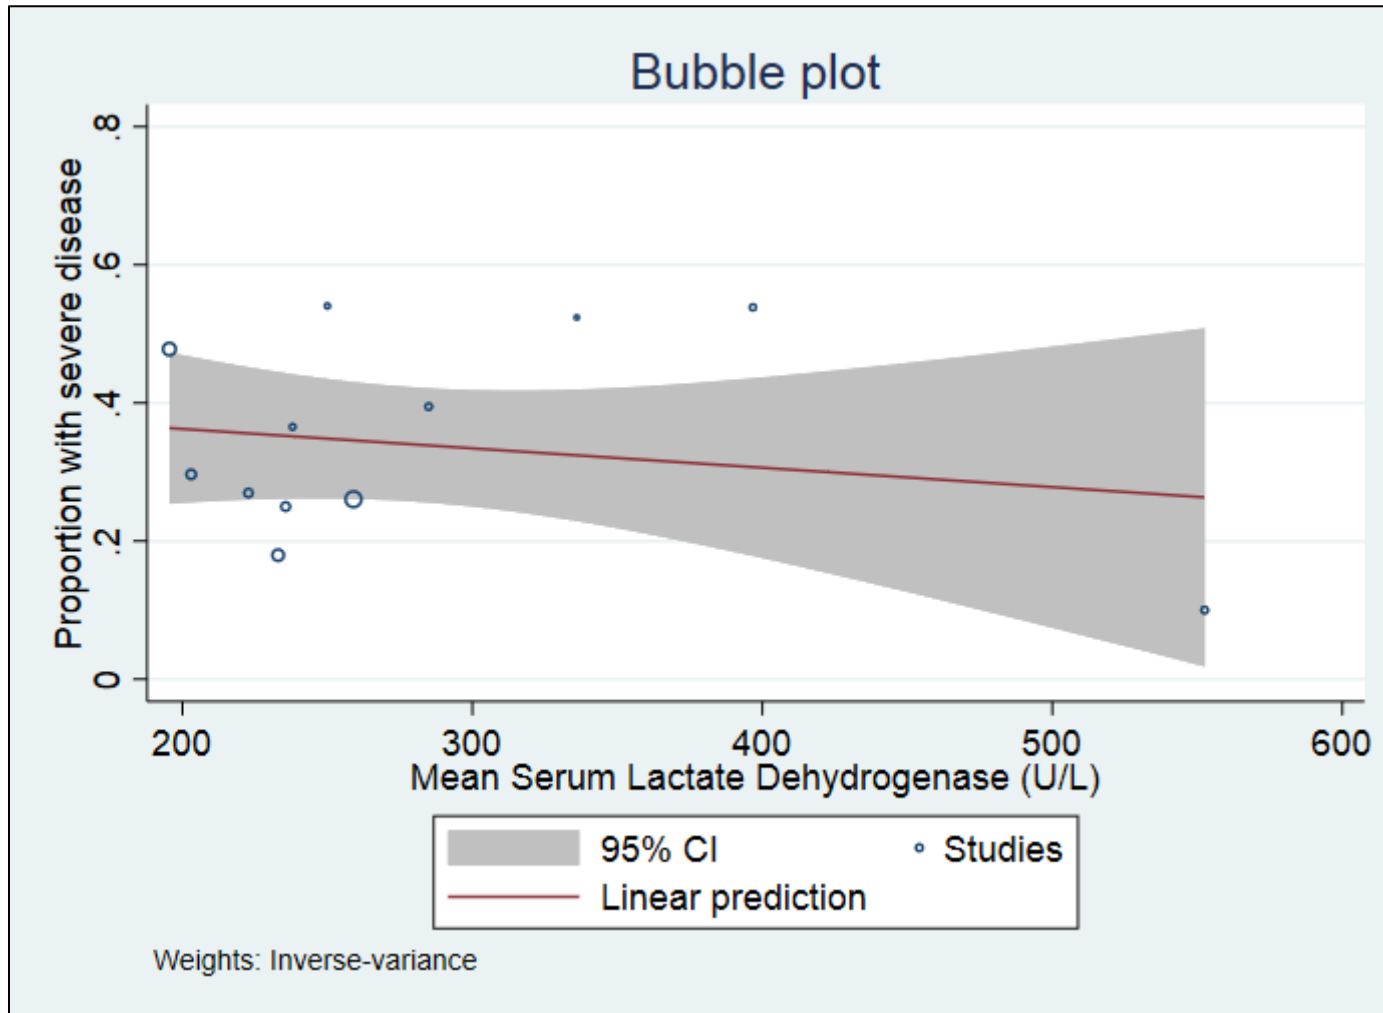

eFigure 174 Percentage change in severe disease with unit increase in mean ESR

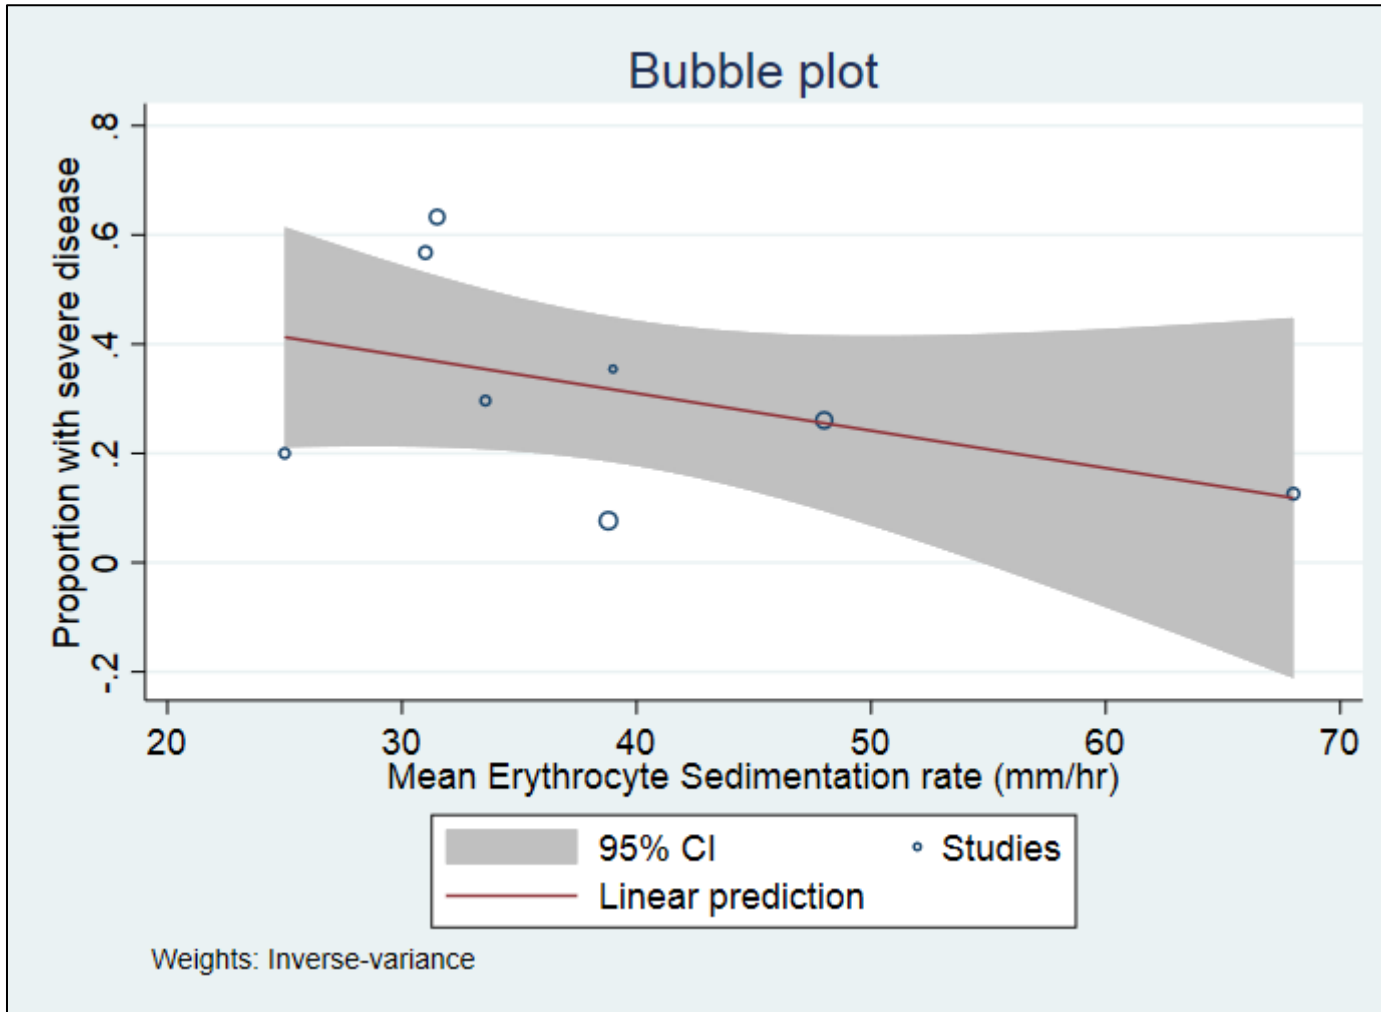

eFigure 175 Percentage change in severe disease with unit increase in mean serum creatinine

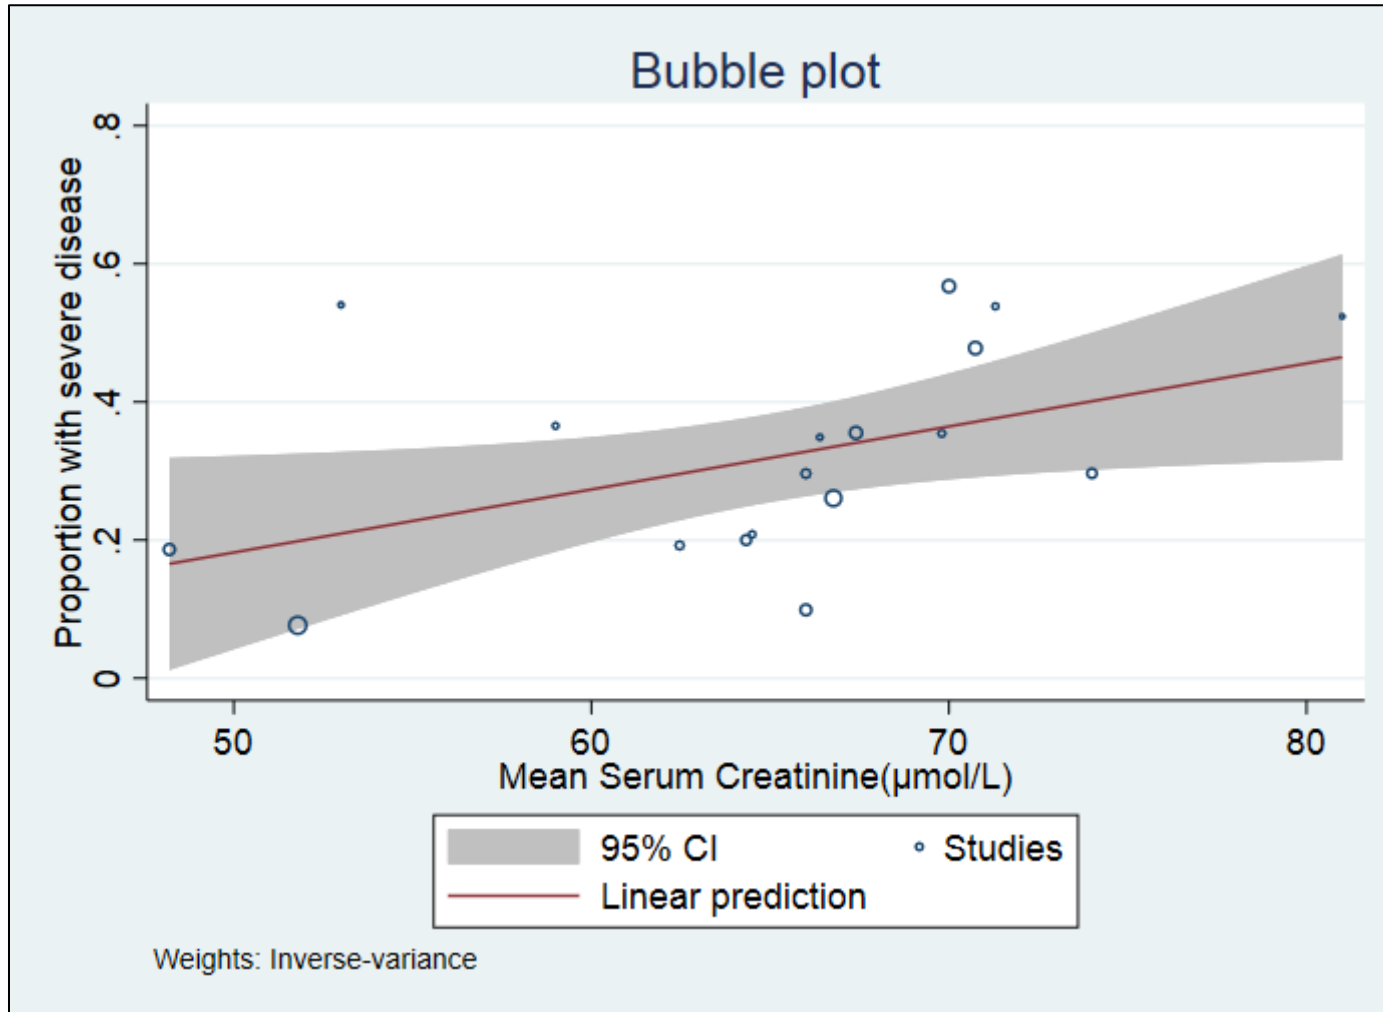

eFigure 176 Percentage change in severe disease with unit increase in mean serum BUN

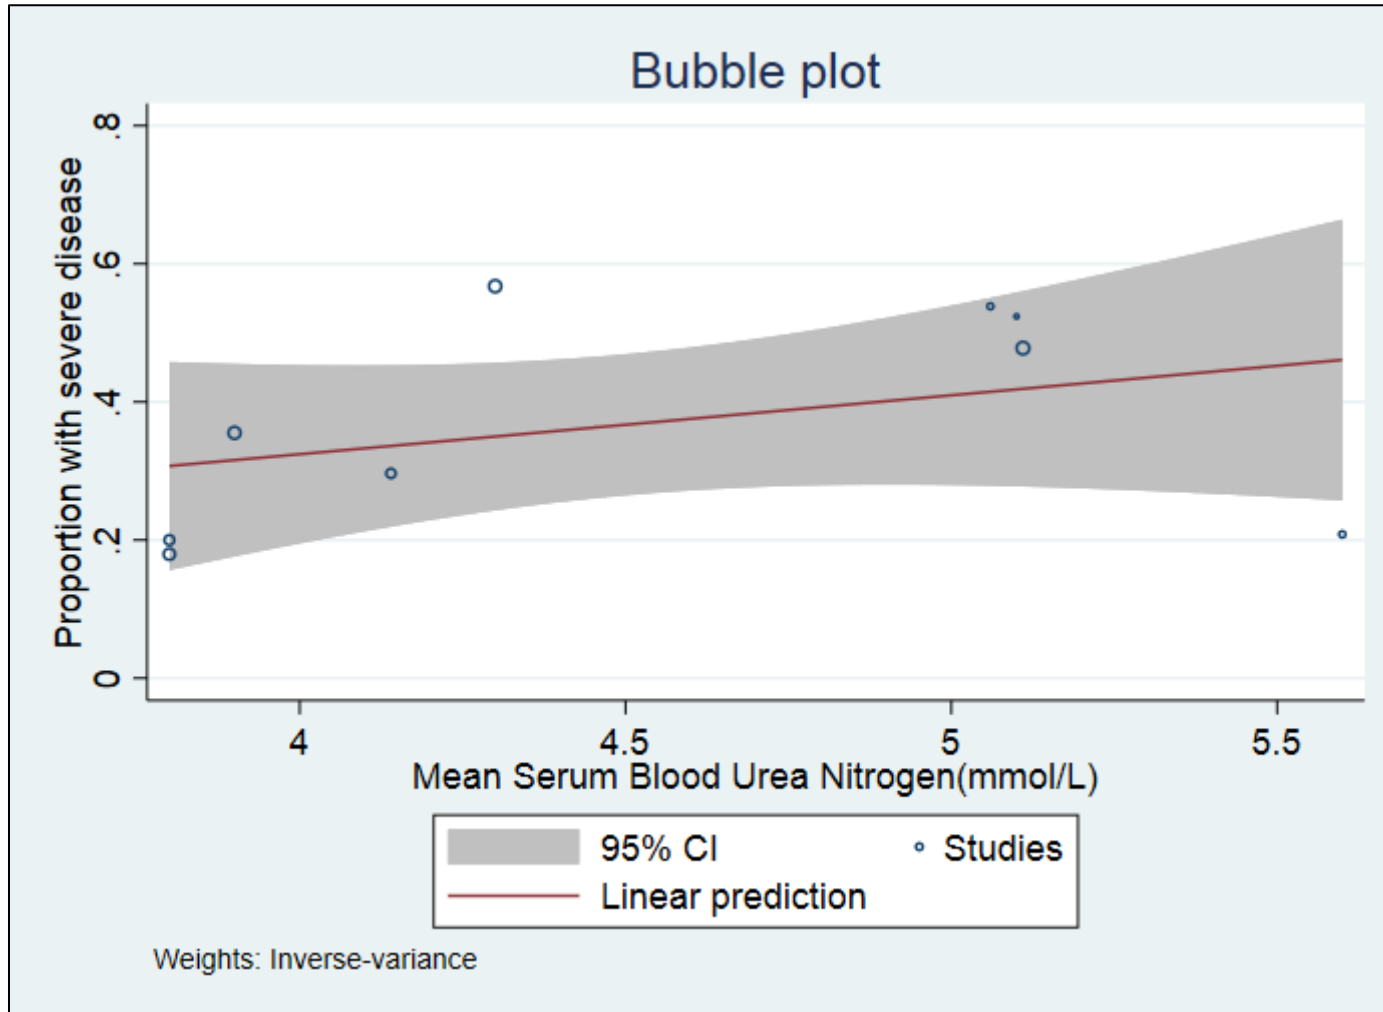

eFigure 178 Percentage change in severe disease with unit increase in mean total bilirubin

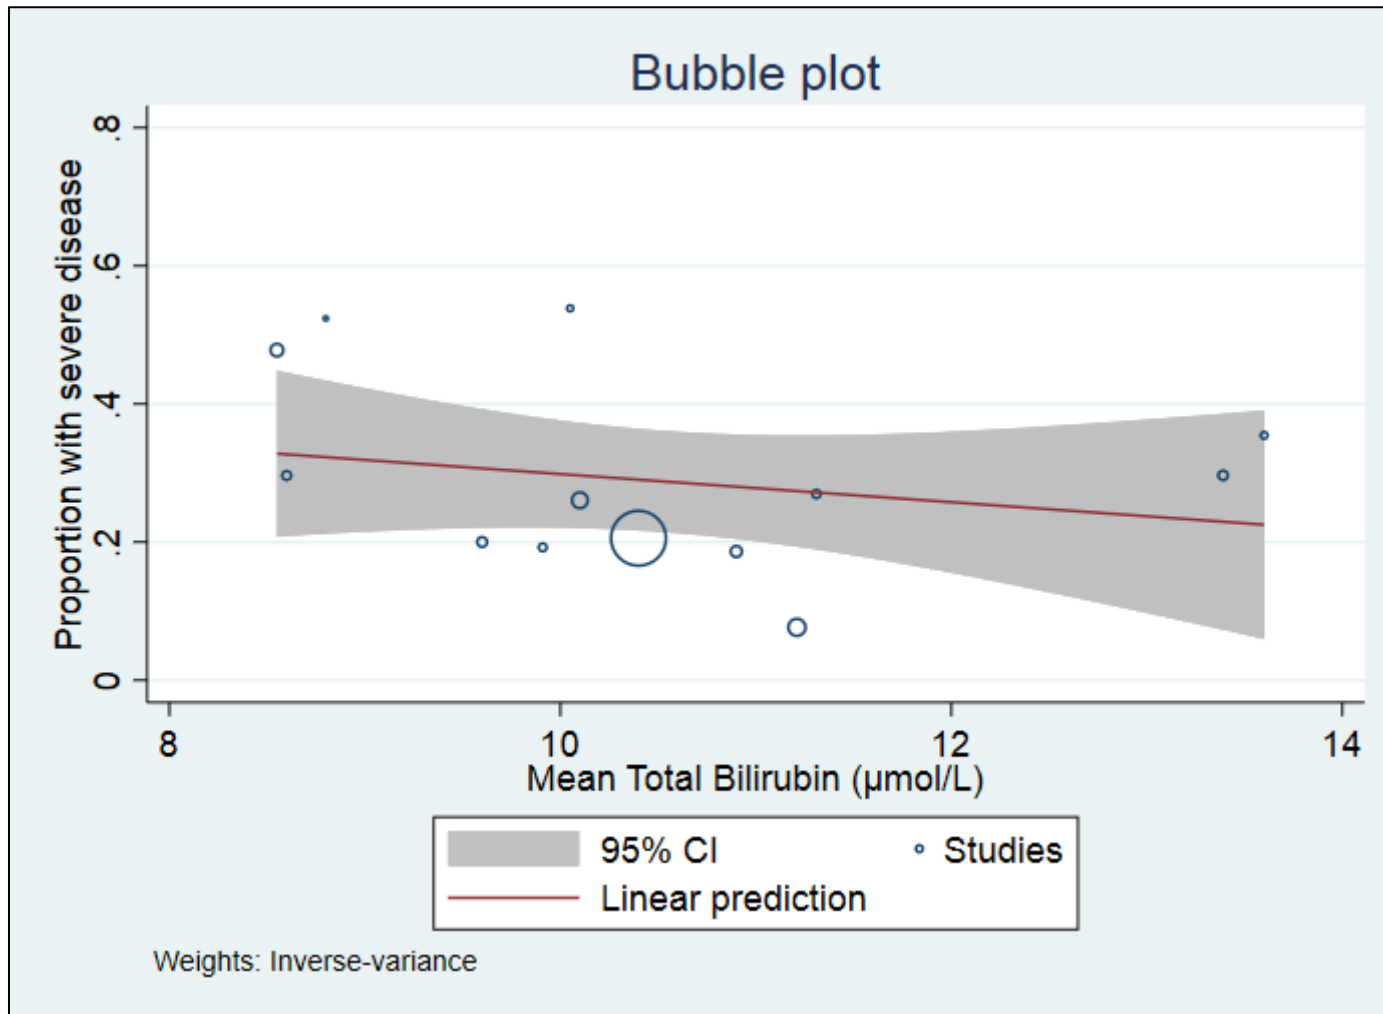



eFigure 179 Percentage change in severe disease with unit increase in mean serum albumin

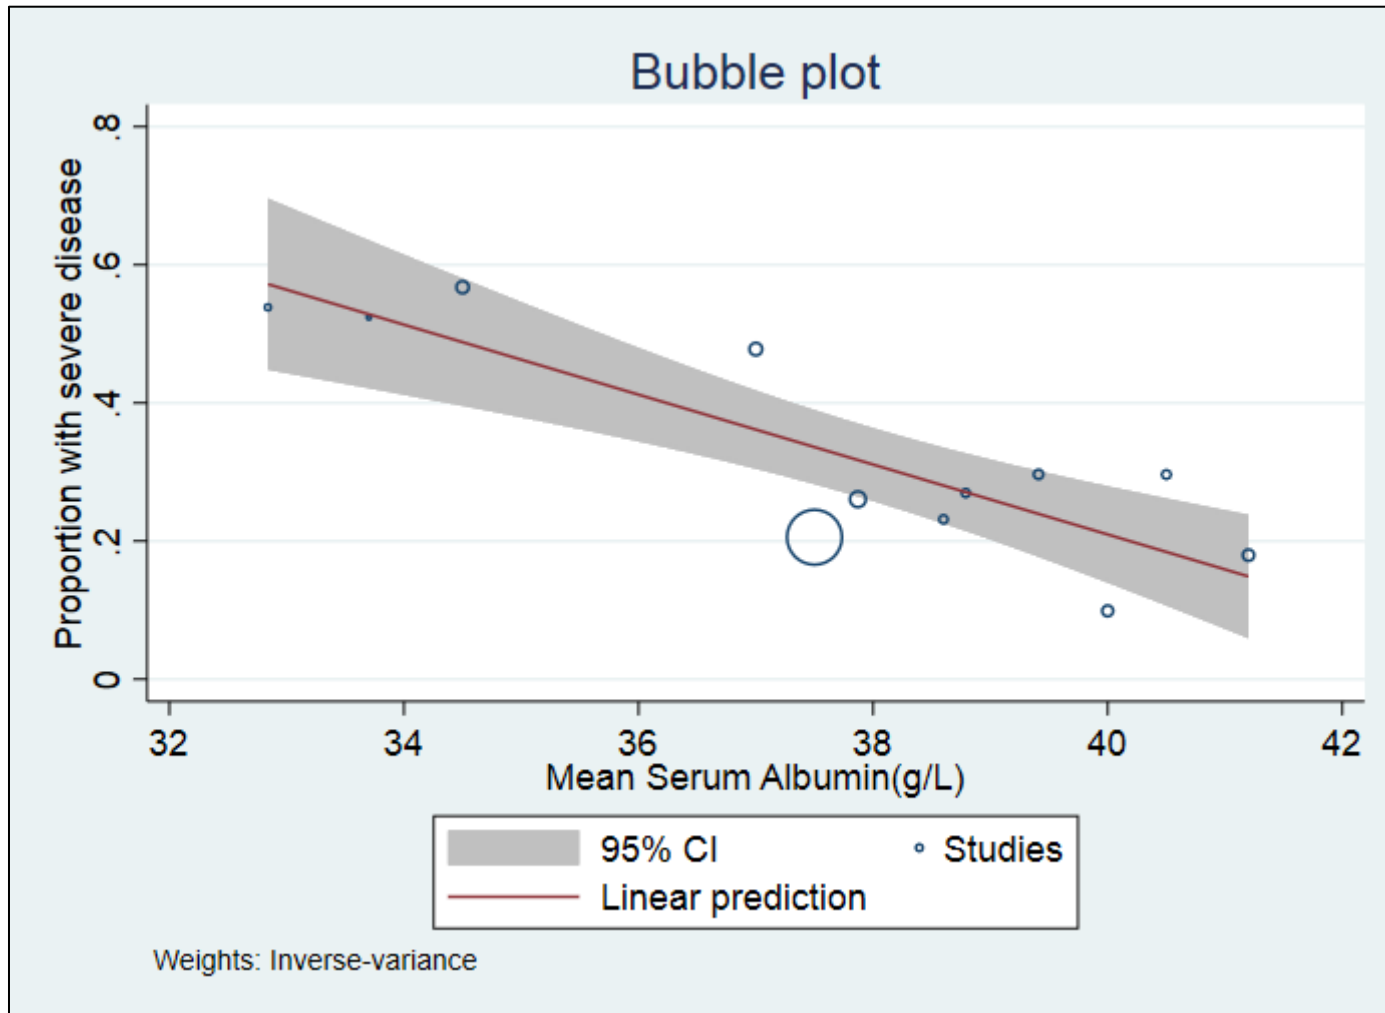

eFigure 180 Percentage change in severe disease with unit increase in mean AST

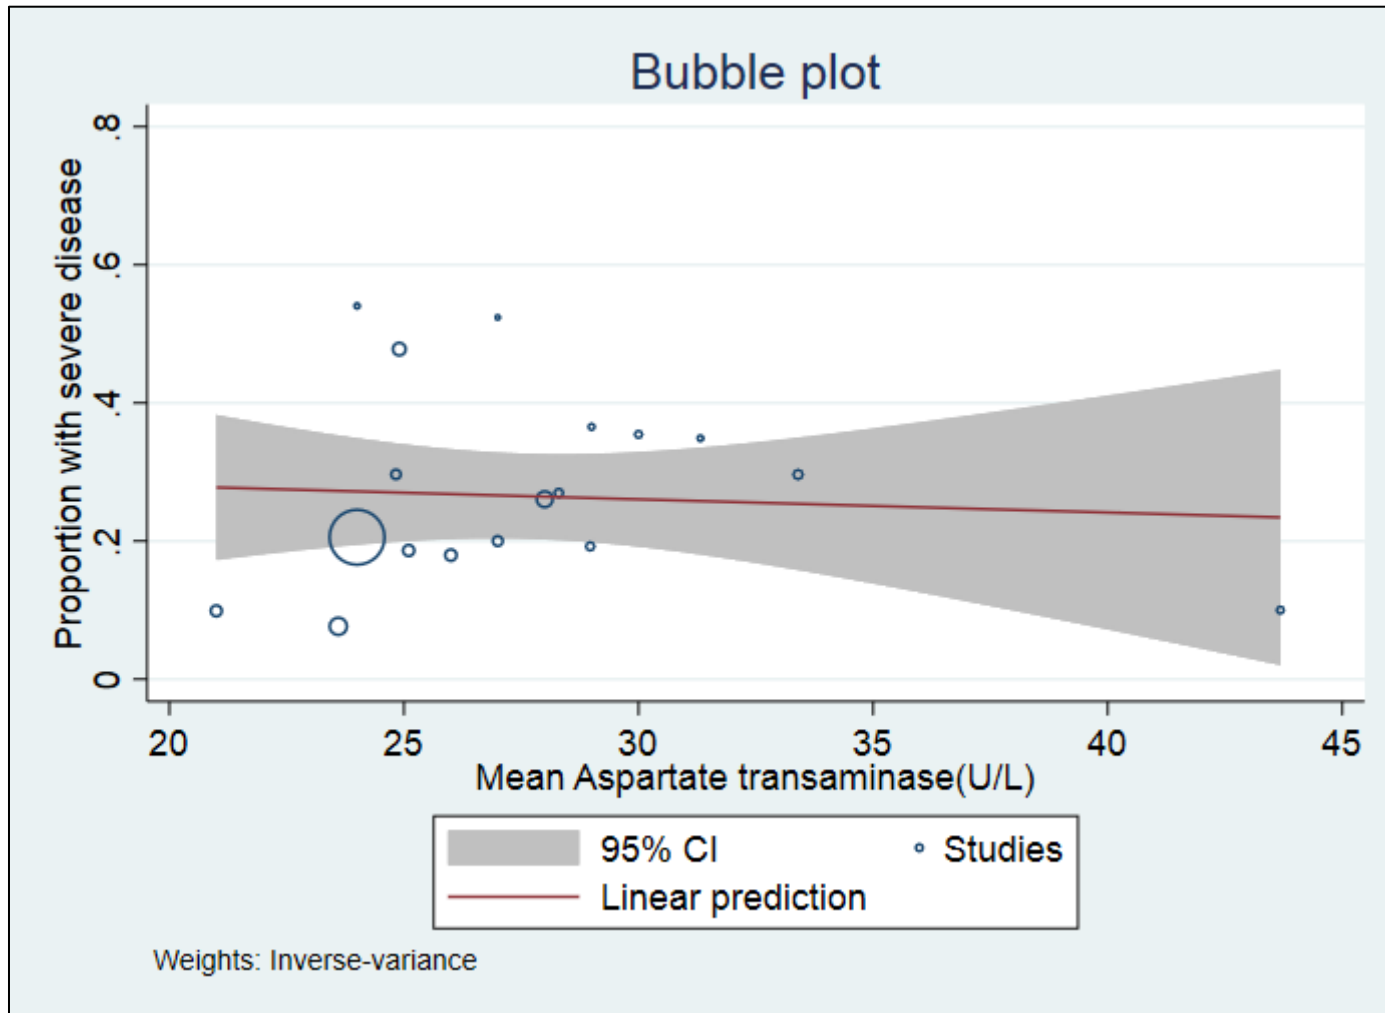

eFigure 181 Percentage change in severe disease with unit increase in mean ALT

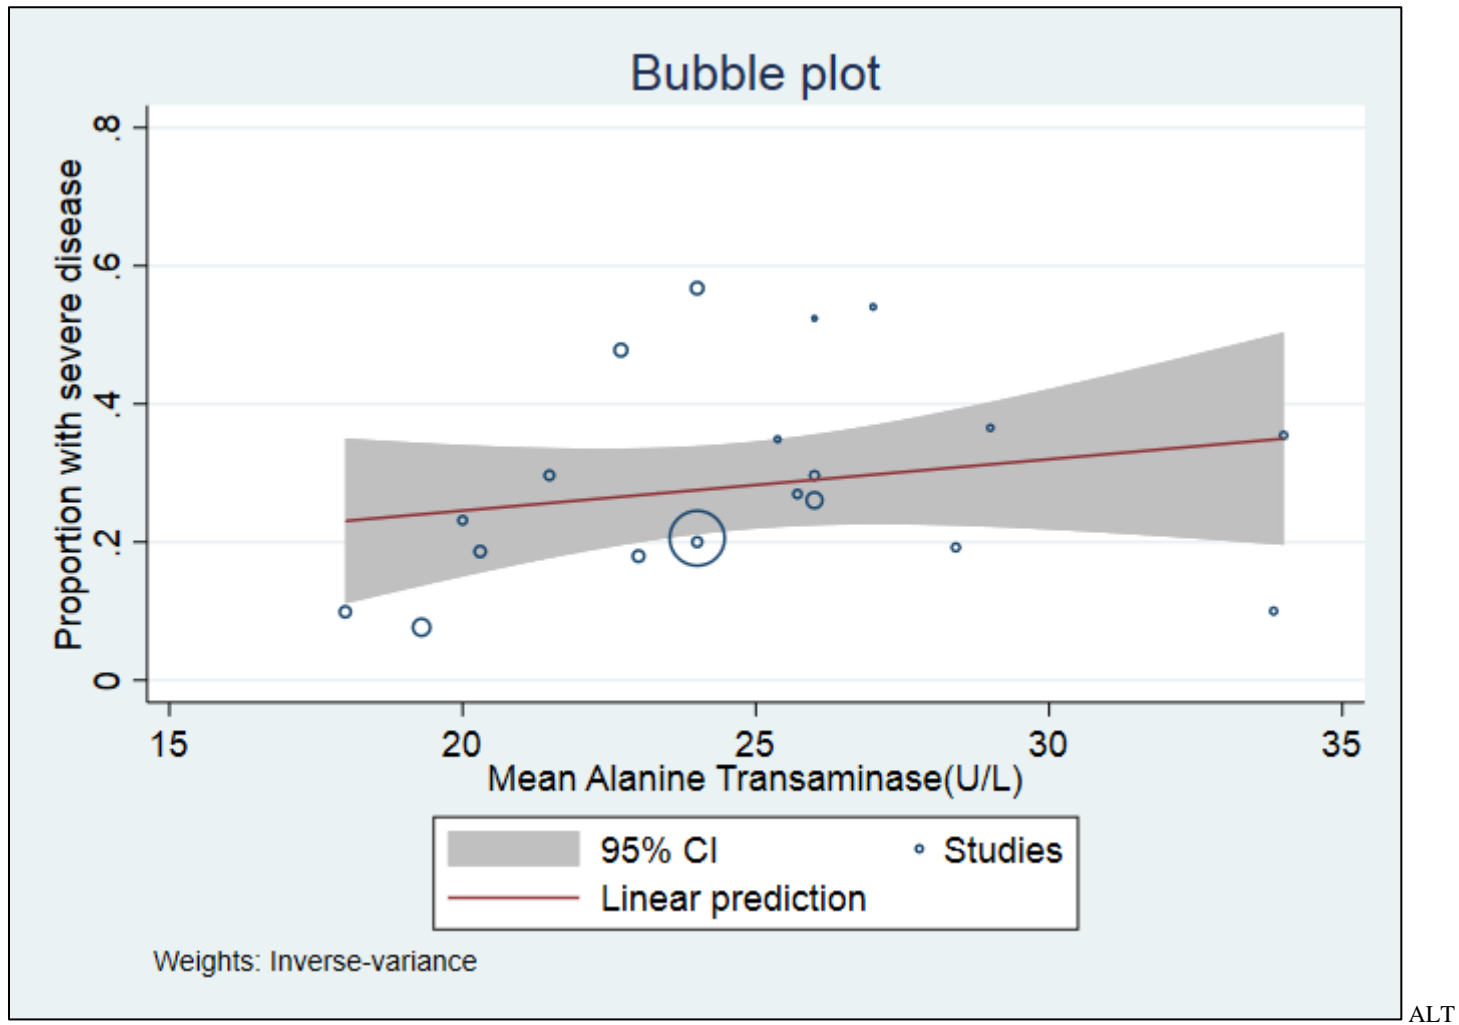

eFigure 182 Percentage change in severe disease with unit increase in mean Fibrinogen

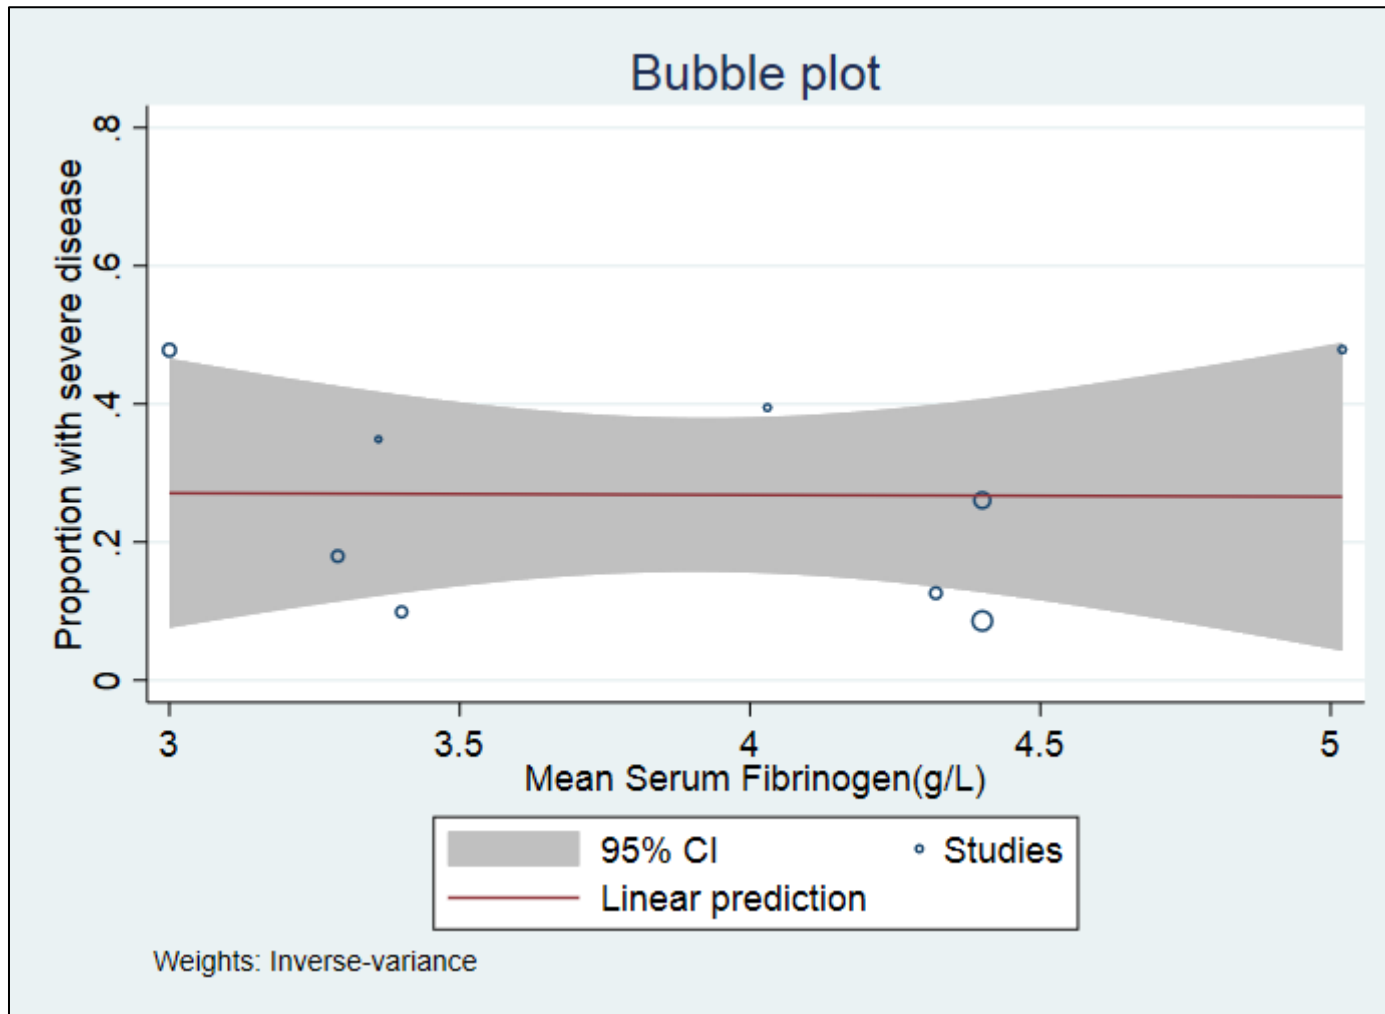

eFigure 183 Percentage change in severe disease with unit increase in mean procalcitonin

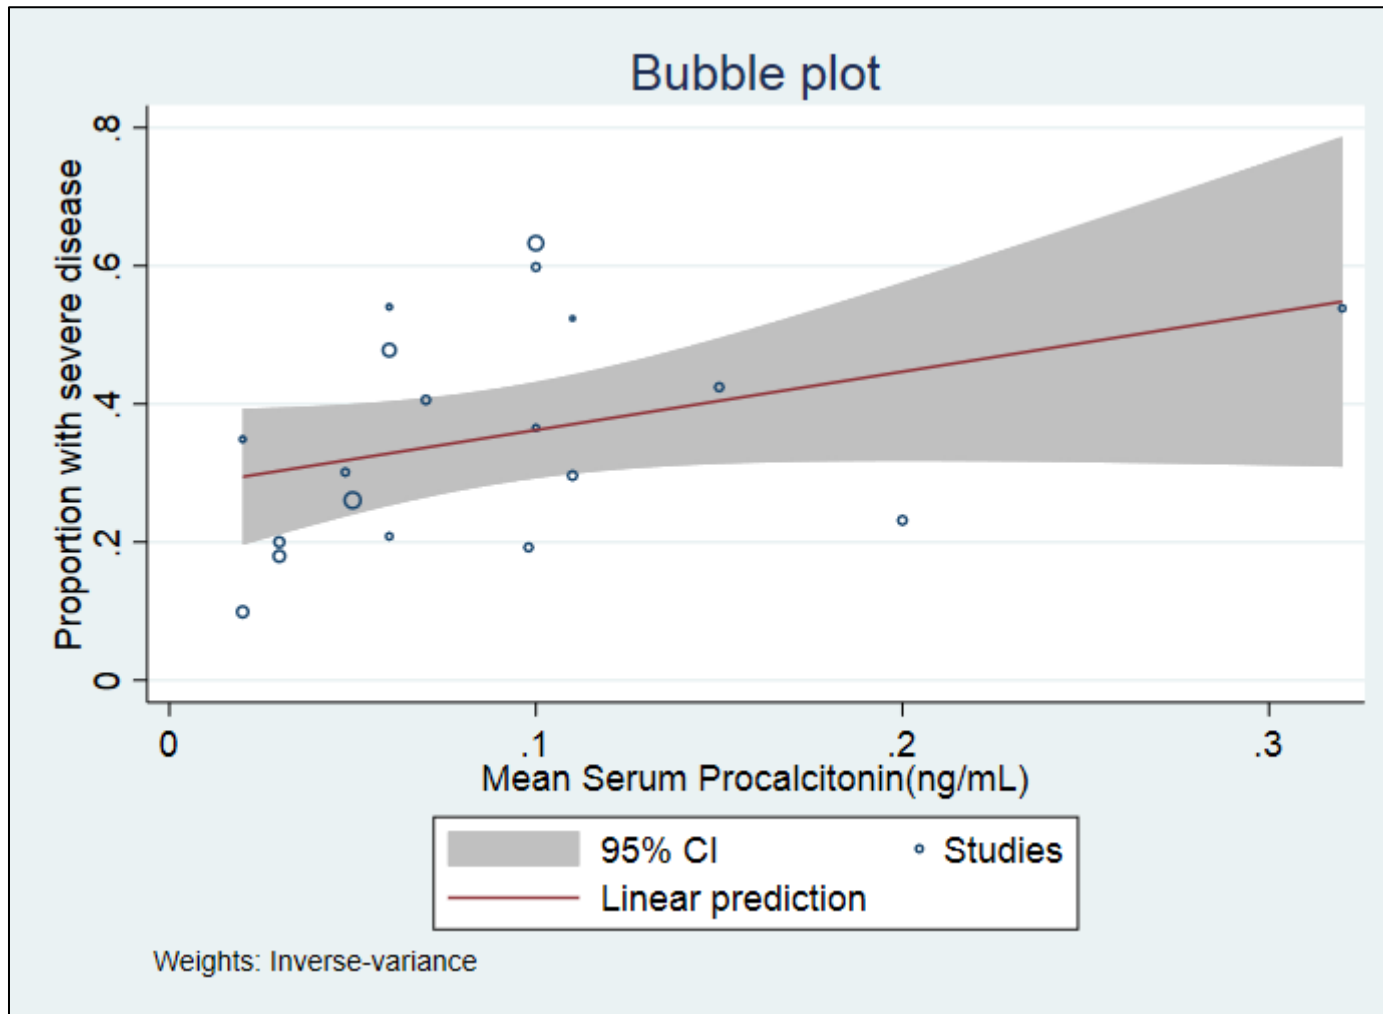

eFigure 184 Percentage change in severe disease with unit increase in mean CK total

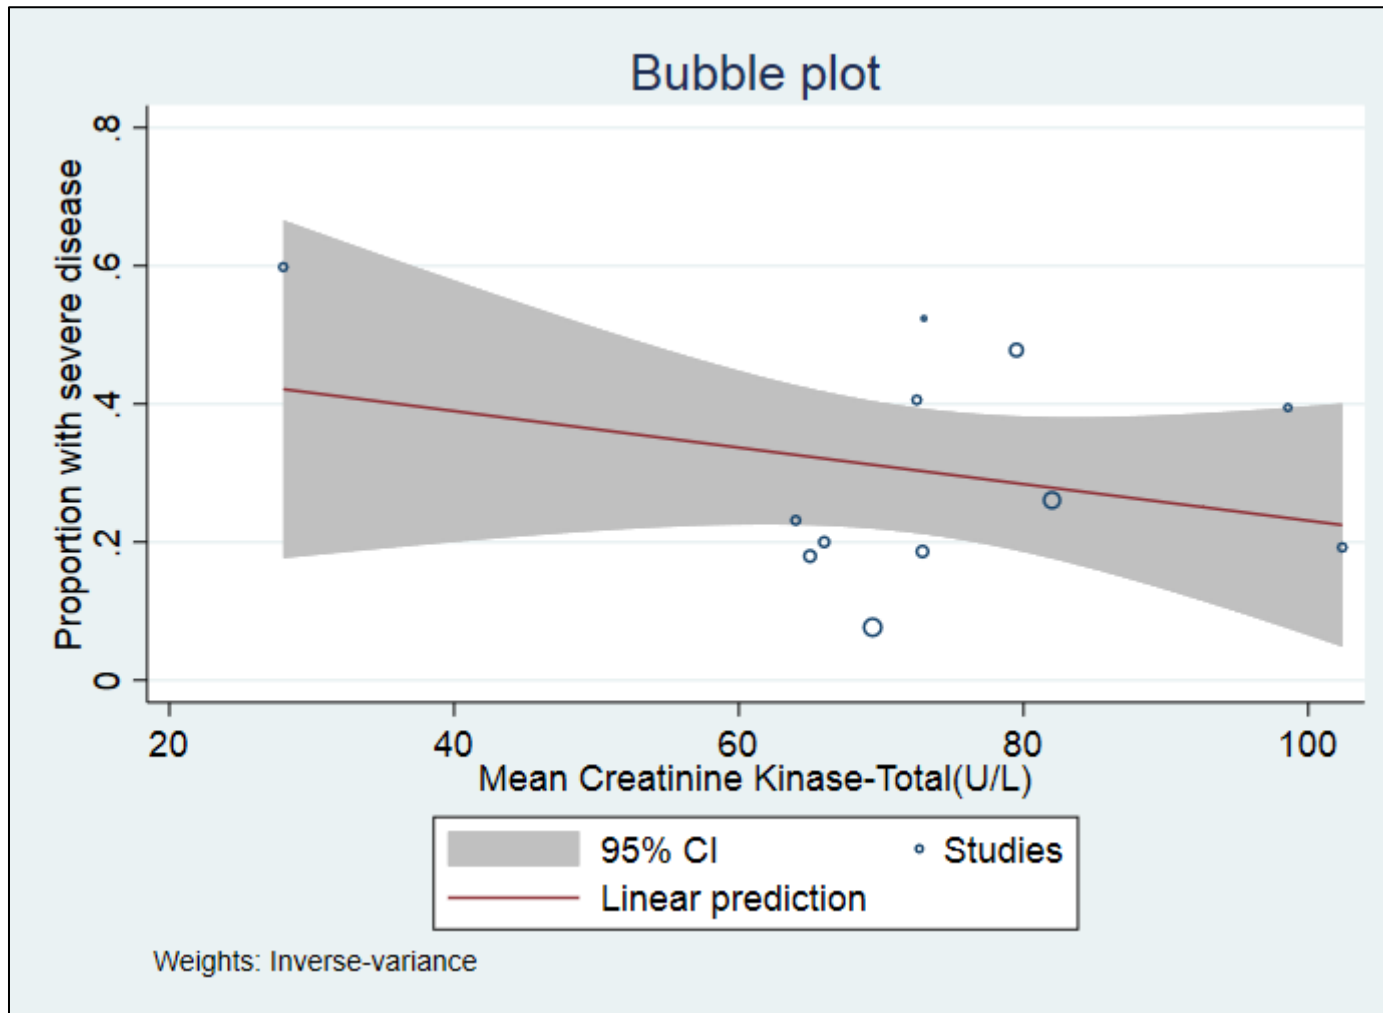

eFigure 185 Percentage change in severe disease with unit increase in mean serum CK MB

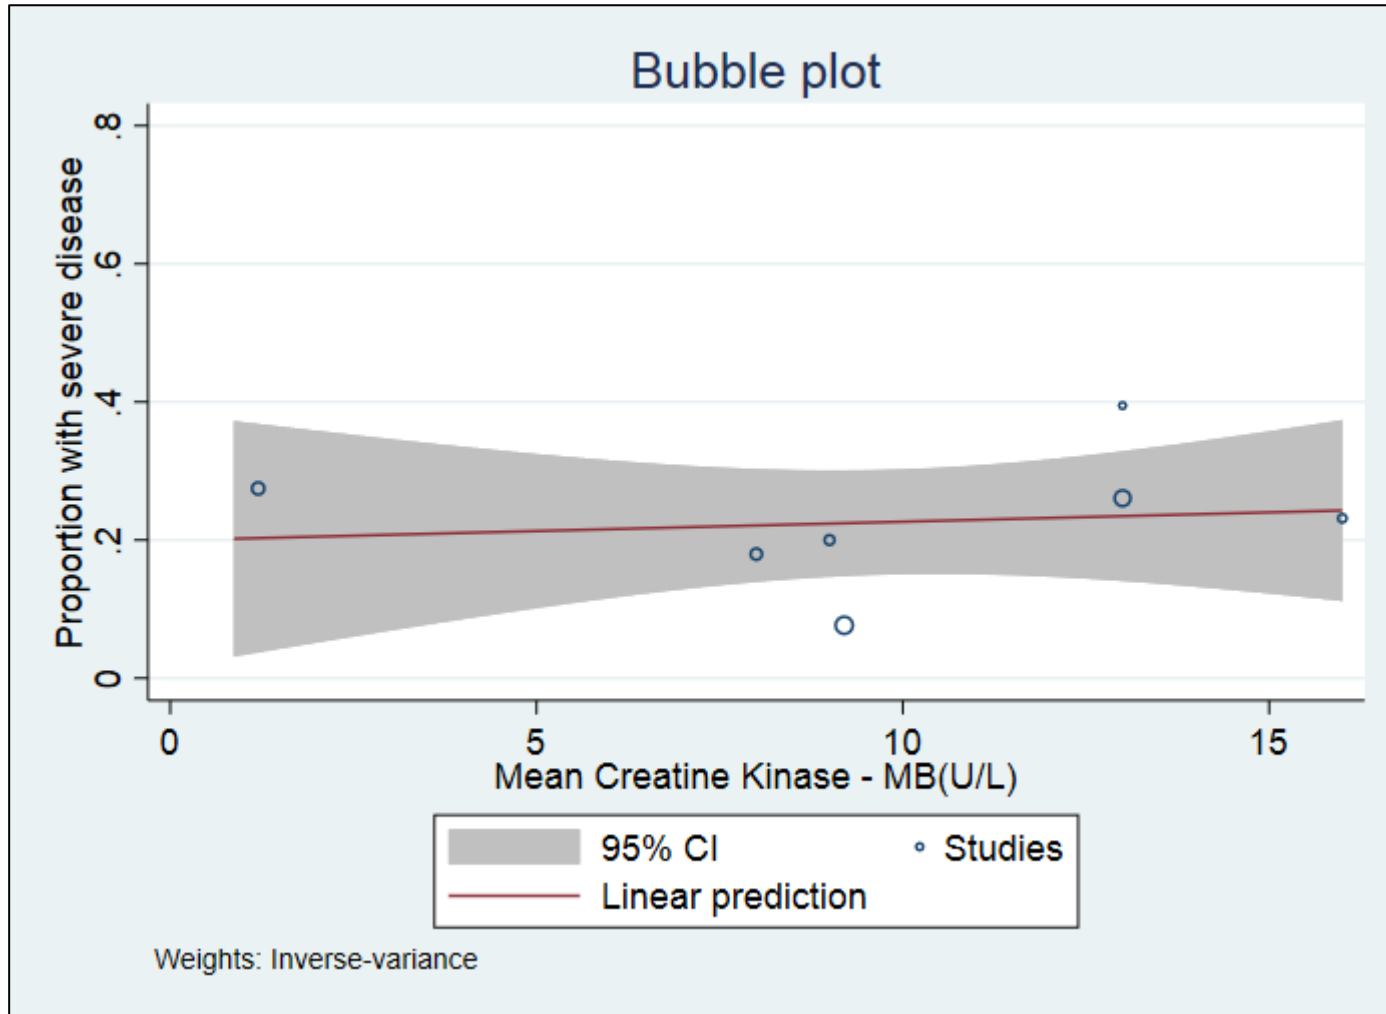

## Section VII

**Supplementary table 6A: Definitions of “severe disease”**

| Source                                                                                                                                                                              | Definition                                                                                                                                                                                                                                                                                                                                                                                                                                                                                                                                                                                                                                                                                                                                                                                                                              |
|-------------------------------------------------------------------------------------------------------------------------------------------------------------------------------------|-----------------------------------------------------------------------------------------------------------------------------------------------------------------------------------------------------------------------------------------------------------------------------------------------------------------------------------------------------------------------------------------------------------------------------------------------------------------------------------------------------------------------------------------------------------------------------------------------------------------------------------------------------------------------------------------------------------------------------------------------------------------------------------------------------------------------------------------|
| <p><b>American Thoracic Society guidelines for community-acquired pneumonia(110)</b></p>                                                                                            | <p>Validated definition includes either one major criterion or three or more minor criteria</p> <p>Minor criteria</p> <ul style="list-style-type: none"> <li>- Respiratory rate &gt; 30 breaths/min</li> <li>- PaO<sub>2</sub>/FIO<sub>2</sub> ratio &lt; 250</li> <li>- Multi lobar infiltrates</li> <li>- Confusion/disorientation</li> <li>- Uremia (blood urea nitrogen level &gt; 20 mg/dl)</li> <li>- Leukopenia* (white blood cell count, 4,000 cells/ml)</li> <li>- Thrombocytopenia (platelet count, 100,000/ml)</li> <li>- Hypothermia (core temperature, 36.8C)</li> <li>- Hypotension requiring aggressive fluid resuscitation</li> </ul> <p>Major criteria</p> <ul style="list-style-type: none"> <li>- Septic shock with need for vasopressors</li> <li>- Respiratory failure requiring mechanical ventilation</li> </ul> |
| <p><b>Chinese National Health Commission guidelines(111)</b><br/>Severe disease in our review had features of “severe” or “critical” patients according to the CNHC guidelines.</p> | <p>Severe patients met any of the following condition:</p> <ol style="list-style-type: none"> <li>1) respiratory rate <math>\geq</math>30 breaths per minute.</li> <li>2) oxygen saturation <math>\leq</math>93% in a resting state;</li> <li>3) arterial oxygen tension (PaO<sub>2</sub>)/inspiratory oxygen fraction (FiO<sub>2</sub>) <math>\leq</math>300 mmHg;</li> <li>4) respiratory failure</li> </ol> <p>Critical patients</p> <ol style="list-style-type: none"> <li>1) respiratory failure and requiring mechanical ventilation</li> <li>2) shock</li> <li>3) patients with other organ failure needing intensive care unit monitoring and treatment.</li> </ol>                                                                                                                                                             |



**Supplementary table 6B: Definitions of complications assessed for association with mortality**

| <i>Definitions of variables</i>            | <b>Source</b>                                                                |
|--------------------------------------------|------------------------------------------------------------------------------|
| Sepsis and Shock                           | Third International Consensus Definition for Sepsis and Septic Shock(112)    |
| Acute cardiac injury                       | Fourth universal definition of myocardial infarction Consensus Document(113) |
| Acute Respiratory Distress Syndrome (ARDS) | The Berlin Definition of Acute Respiratory Distress Syndrome(114)            |
| Acute Kidney Injury (AKI)                  | KDIGO definition for AKI(115)                                                |

## **Section VIII**

### **References for the supplementary document:**

1. Yang X, Yu Y, Xu J, Shu H, Xia J, Liu H, et al. Clinical course and outcomes of critically ill patients with SARS-CoV-2 pneumonia in Wuhan, China: a single-centered, retrospective, observational study. *The Lancet Respiratory Medicine*. 2020 May;8(5):475–81.
2. Chen T, Wu D, Chen H, Yan W, Yang D, Chen G, et al. Clinical characteristics of 113 deceased patients with coronavirus disease 2019: retrospective study. *BMJ*. 2020 Mar 26;m1091.
3. Tang N, Li D, Wang X, Sun Z. Abnormal coagulation parameters are associated with poor prognosis in patients with novel coronavirus pneumonia. *Journal of Thrombosis and Haemostasis*. 2020 Apr;18(4):844–7.
4. Ruan Q, Yang K, Wang W, Jiang L, Song J. Clinical predictors of mortality due to COVID-19 based on an analysis of data of 150 patients from Wuhan, China. *Intensive Care Medicine*. 2020 May;46(5):846–8.
5. Wu C, Chen X, Cai Y, Xia J, Zhou X, Xu S, et al. Risk Factors Associated With Acute Respiratory Distress Syndrome and Death in Patients With Coronavirus Disease 2019 Pneumonia in Wuhan, China. *JAMA Internal Medicine* [Internet]. 2020 Mar 13 [cited 2020 May 25]; Available from: <https://jamanetwork.com/journals/jamainternalmedicine/fullarticle/2763184>
6. Li Y, Peng S, Li L, Wang Q, Ping W, Zhang N, et al. Clinical and Transmission Characteristics of Covid-19 — A Retrospective Study of 25 Cases from a Single Thoracic Surgery Department. *Current Medical Science*. 2020 Apr;40(2):295–300.
7. Deng Y, Liu W, Liu K, Fang Y-Y, Shang J, Zhou L, et al. Clinical characteristics of fatal and recovered cases of coronavirus disease 2019 (COVID-19) in Wuhan, China: a retrospective study. *Chinese Medical Journal*. 2020 Mar;1.
8. Yuan M, Yin W, Tao Z, Tan W, Hu Y. Association of radiologic findings with mortality of patients infected with 2019 novel coronavirus in Wuhan, China. *PLOS ONE*. 2019;10.
9. Zhou F, Yu T, Du R, Fan G, Liu Y, Liu Z, et al. Clinical course and risk factors for mortality of adult inpatients with COVID-19 in Wuhan, China: a retrospective cohort study. *The Lancet*. 2020 Mar;395(10229):1054–62.

10. Cao J, Tu W-J, Cheng W, Yu L, Liu Y-K, Hu X, et al. Clinical Features and Short-term Outcomes of 102 Patients with Corona Virus Disease 2019 in Wuhan, China. *Clinical Infectious Diseases* [Internet]. 2020 Apr 2 [cited 2020 May 25]; Available from: <https://academic.oup.com/cid/advance-article/doi/10.1093/cid/ciaa243/5814897>
11. Du R-H, Liang L-R, Yang C-Q, Wang W, Cao T-Z, Li M, et al. Predictors of mortality for patients with COVID-19 pneumonia caused by SARS-CoV-2: a prospective cohort study. *European Respiratory Journal*. 2020 May;55(5):2000524.
12. Tu W-J, Cao J, Yu L, Hu X, Liu Q. Clinicolaboratory study of 25 fatal cases of COVID-19 in Wuhan. *Intensive Care Medicine* [Internet]. 2020 Apr 6 [cited 2020 May 25]; Available from: <http://link.springer.com/10.1007/s00134-020-06023-4>
13. Wang L, He W, Yu X, Hu D, Bao M, Liu H, et al. Coronavirus disease 2019 in elderly patients: Characteristics and prognostic factors based on 4-week follow-up. *Journal of Infection*. 2020 Jun;80(6):639–45.
14. Wang Y, Lu X, Chen H, Chen T, Su N, Huang F, et al. Clinical Course and Outcomes of 344 Intensive Care Patients with COVID-19. *American Journal of Respiratory and Critical Care Medicine* [Internet]. 2020 Apr 8 [cited 2020 May 25]; Available from: <https://www.atsjournals.org/doi/10.1164/rccm.202003-0736LE>
15. Dai M, Liu D, Liu M, Zhou F, Li G, Chen Z, et al. Patients with cancer appear more vulnerable to SARS-COV-2: a multi-center study during the COVID-19 outbreak. *Cancer Discovery*. 2020 Apr 28;CD-20-0422.
16. Ding M, Zhang Q, Li Q, Wu T, Huang Y. Correlation analysis of the severity and clinical prognosis of 32 cases of patients with COVID-19. *Respiratory Medicine*. 2020 Jun;167:105981.
17. Barrasa H, Rello J, Tejada S, Martín A, Balziskueta G, Vinuesa C, et al. SARS-CoV-2 in Spanish Intensive Care Units: Early experience with 15-day survival in Vitoria. *Anaesthesia Critical Care & Pain Medicine* [Internet]. 2020 Apr [cited 2020 May 25]; Available from: <https://linkinghub.elsevier.com/retrieve/pii/S2352556820300643>
18. Chen T, Dai Z, Mo P, Li X, Ma Z, Song S, et al. Clinical Characteristics and Outcomes of Older Patients with Coronavirus Disease 2019 (COVID-19) in Wuhan, China: A Single-Centered, Retrospective Study. Newman A, editor. *The Journals of Gerontology: Series A* [Internet]. 2020 Apr 11 [cited 2020 May 25]; Available from: <https://academic.oup.com/biomedgerontology/advance-article/doi/10.1093/gerona/glaa089/5819242>
19. Trujillo H, Caravaca-Fontán F, Sevillano Á, Gutiérrez E, Caro J, Gutiérrez E, et al. SARS-CoV-2 Infection in Hospitalized Patients With Kidney Disease. *Kidney International Reports* [Internet]. 2020 May [cited 2020 May 25]; Available from: <https://linkinghub.elsevier.com/retrieve/pii/S2468024920312274>

20. Webb GJ, Moon AM, Barnes E, Barritt AS, Marjot T. Determining risk factors for mortality in liver transplant patients with COVID-19. *The Lancet Gastroenterology & Hepatology* [Internet]. 2020 Apr [cited 2020 May 25]; Available from: <https://linkinghub.elsevier.com/retrieve/pii/S2468125320301254>
21. Yao Q, Wang P, Wang X, Qie G, Meng M, Tong X, et al. Retrospective study of risk factors for severe SARS-Cov-2 infections in hospitalized adult patients. *Polish Archives of Internal Medicine* [Internet]. 2020 Apr 24 [cited 2020 May 25]; Available from: <https://www.mp.pl/paim/issue/article/15312>
22. Wei F, Wang H, Huang H, Luo C, Zhou X, Xu N, et al. Acute myocardial injury is common in patients with covid-19 and impairs their prognosis. :6.
23. Tomlins J, Hamilton F, Gunning S, Sheehy C, Moran E, MacGowan A. Clinical features of 95 sequential hospitalised patients with novel coronavirus 2019 disease (COVID-19), the first UK cohort. *Journal of Infection* [Internet]. 2020 Apr [cited 2020 May 25]; Available from: <https://linkinghub.elsevier.com/retrieve/pii/S0163445320302322>
24. Yang X, Yang Q, Wang Y, Wu Y, Xu J, Yu Y, et al. Thrombocytopenia and its association with mortality in patients with COVID-19. *Journal of Thrombosis and Haemostasis* [Internet]. 2020 May 4 [cited 2020 May 25]; Available from: <https://onlinelibrary.wiley.com/doi/abs/10.1111/jth.14848>
25. Yang R, Gui X, Zhang Y, Xiong Y. The role of essential organ-based comorbidities in the prognosis of COVID-19 infection patients. *Expert Review of Respiratory Medicine*. 2020 Apr 28;1–4.
26. Richardson S, Hirsch JS, Narasimhan M, Crawford JM, McGinn T, Davidson KW, et al. Presenting Characteristics, Comorbidities, and Outcomes Among 5700 Patients Hospitalized With COVID-19 in the New York City Area. *JAMA* [Internet]. 2020 Apr 22 [cited 2020 May 25]; Available from: <https://jamanetwork.com/journals/jama/fullarticle/2765184>
27. Gold JAW, Wong KK, Szablewski CM, Patel PR, Rossow J, da Silva J, et al. Characteristics and Clinical Outcomes of Adult Patients Hospitalized with COVID-19 — Georgia, March 2020. *MMWR Morbidity and Mortality Weekly Report*. 2020 May 8;69(18):545–50.
28. Gao L, Jiang D, Wen X, Cheng X, Sun M, He B, et al. Prognostic value of NT-proBNP in patients with severe COVID-19. *Respiratory Research* [Internet]. 2020 Dec [cited 2020 May 25];21(1). Available from: <https://respiratory-research.biomedcentral.com/articles/10.1186/s12931-020-01352-w>

29. Singh S, Khan A. Clinical Characteristics and Outcomes of COVID-19 Among Patients with Pre-Existing Liver Disease in United States: A Multi-Center Research Network Study. *Gastroenterology* [Internet]. 2020 May [cited 2020 May 25]; Available from: <https://linkinghub.elsevier.com/retrieve/pii/S0016508520305850>
30. Zangrillo A, Beretta L, Scandroglio AM, Monti G, Fominskiy E, Colombo S, et al. Characteristics, treatment, outcomes and cause of death of invasively ventilated patients with COVID-19 ARDS in Milan, Italy. *Critical Care and Resuscitation*. :12.
31. Yan Y, Yang Y, Wang F, Ren H, Zhang S, Shi X, et al. Clinical characteristics and outcomes of patients with severe covid-19 with diabetes. *BMJ Open Diabetes Research & Care*. 2020 Apr;8(1):e001343.
32. Wang K, Zuo P, Liu Y, Zhang M, Zhao X, Xie S, et al. Clinical and laboratory predictors of in-hospital mortality in patients with COVID-19: a cohort study in Wuhan, China. *Clin Infect Dis* [Internet]. [cited 2020 May 26]; Available from: <https://academic.oup.com/cid/advance-article/doi/10.1093/cid/ciaa538/5828281>
33. Wang K, Zhang Z, Yu M, Tao Y, Xie M. 15-day mortality and associated risk factors for hospitalized patients with COVID-19 in Wuhan, China: an ambispective observational cohort study. *Intensive Care Medicine* [Internet]. 2020 Apr 23 [cited 2020 May 25]; Available from: <http://link.springer.com/10.1007/s00134-020-06047-w>
34. Zhang L, Yan X, Fan Q, Liu H, Liu X, Liu Z, et al. D-dimer levels on admission to predict in-hospital mortality in patients with Covid-19. *Journal of Thrombosis and Haemostasis* [Internet]. 2020 Apr 19 [cited 2020 May 25]; Available from: <https://onlinelibrary.wiley.com/doi/abs/10.1111/jth.14859>
35. Wang D, Yin Y, Hu C, Liu X, Zhang X, Zhou S, et al. Clinical course and outcome of 107 patients infected with the novel coronavirus, SARS-CoV-2, discharged from two hospitals in Wuhan, China. *Critical Care* [Internet]. 2020 Dec [cited 2020 May 25];24(1). Available from: <https://ccforum.biomedcentral.com/articles/10.1186/s13054-020-02895-6>
36. Liu Y, Sun W, Guo Y, Chen L, Zhang L, Zhao S, et al. Association between platelet parameters and mortality in coronavirus disease 2019: Retrospective cohort study. *Platelets*. 2020 May 18;31(4):490–6.
37. Liu Y, Du X, Chen J, Jin Y, Peng L, Wang HHX, et al. Neutrophil-to-lymphocyte ratio as an independent risk factor for mortality in hospitalized patients with COVID-19. *Journal of Infection* [Internet]. 2020 Apr [cited 2020 May 25]; Available from: <https://linkinghub.elsevier.com/retrieve/pii/S0163445320302085>

38. Li J, Wang X, Chen J, Zhang H, Deng A. Association of Renin-Angiotensin System Inhibitors With Severity or Risk of Death in Patients With Hypertension Hospitalized for Coronavirus Disease 2019 (COVID-19) Infection in Wuhan, China. *JAMA Cardiology* [Internet]. 2020 Apr 23 [cited 2020 May 25]; Available from: <https://jamanetwork.com/journals/jamacardiology/fullarticle/2765049>
39. Nikpouraghdam M, Jalali Farahani A, Alishiri G, Heydari S, Ebrahimnia M, Samadinia H, et al. Epidemiological characteristics of coronavirus disease 2019 (COVID-19) patients in IRAN: A single center study. *Journal of Clinical Virology*. 2020 Jun;127:104378.
40. Zhang J, Wang X, Jia X, Li J, Hu K, Chen G, et al. Risk factors for disease severity, unimprovement, and mortality in COVID-19 patients in Wuhan, China. *Clinical Microbiology and Infection*. 2020 Jun;26(6):767–72.
41. Mehta V, Goel S, Kabarriti R, Cole D, Goldfinger M, Acuna-Villaorduna A, et al. Case Fatality Rate of Cancer Patients with COVID-19 in a New York Hospital System. *Cancer Discovery*. 2020 May 1;CD-20-0516.
42. Zou X, Li S, Fang M, Hu M, Bian Y, Ling J, et al. Acute Physiology and Chronic Health Evaluation II Score as a Predictor of Hospital Mortality in Patients of Coronavirus Disease 2019: *Critical Care Medicine*. 2020 May;1.
43. Guan W, Ni Z, Hu Y, Liang W, Ou C, He J, et al. Clinical Characteristics of Coronavirus Disease 2019 in China. *New England Journal of Medicine*. 2020 Apr 30;382(18):1708–20.
44. Xu Y-H, Dong J-H, An W-M, Lv X-Y, Yin X-P, Zhang J-Z, et al. Clinical and computed tomographic imaging features of novel coronavirus pneumonia caused by SARS-CoV-2. *Journal of Infection*. 2020 Apr;80(4):394–400.
45. Tian S, Hu N, Lou J, Chen K, Kang X, Xiang Z, et al. Characteristics of COVID-19 infection in Beijing. *Journal of Infection*. 2020 Apr;80(4):401–6.
46. Li K, Wu J, Wu F, Guo D, Chen L, Fang Z, et al. The Clinical and Chest CT Features Associated With Severe and Critical COVID-19 Pneumonia: *Investigative Radiology*. 2020 Jun;55(6):327–31.
47. Zhao W, Zhong Z, Xie X, Yu Q, Liu J. Relation Between Chest CT Findings and Clinical Conditions of Coronavirus Disease (COVID-19) Pneumonia: A Multicenter Study. *American Journal of Roentgenology*. 2020 May;214(5):1072–7.
48. Han H, Yang L, Liu R, Liu F, Wu K, Li J, et al. Prominent changes in blood coagulation of patients with SARS-CoV-2 infection. *Clinical Chemistry and Laboratory Medicine (CCLM)* [Internet]. 2020 Mar 16 [cited 2020 May 25];0(0). Available from: <https://www.degruyter.com/view/journals/cclm/ahead-of-print/article-10.1515-cclm-2020-0188/article-10.1515-cclm-2020-0188.xml>

49. Qian G-Q, Yang N-B, Ding F, Ma AHY, Wang Z-Y, Shen Y-F, et al. Epidemiologic and clinical characteristics of 91 hospitalized patients with COVID-19 in Zhejiang, China: a retrospective, multi-centre case series. *QJM* [Internet]. [cited 2020 May 26]; Available from: <https://academic.oup.com/qjmed/advance-article/doi/10.1093/qjmed/hcaa089/5809152>
50. Qu R, Ling Y, Zhang Y, Wei L, Chen X, Li X, et al. Platelet-to-lymphocyte ratio is associated with prognosis in patients with Corona Virus Disease-19. *Journal of Medical Virology* [Internet]. 2020 Mar 17 [cited 2020 May 25]; Available from: <https://onlinelibrary.wiley.com/doi/abs/10.1002/jmv.25767>
51. Gao Y, Li T, Han M, Li X, Wu D, Xu Y, et al. Diagnostic Utility of Clinical Laboratory Data Determinations for Patients with the Severe COVID-19. *Journal of Medical Virology* [Internet]. 2020 Mar 17 [cited 2020 May 25]; Available from: <https://onlinelibrary.wiley.com/doi/abs/10.1002/jmv.25770>
52. Liu K-C, Xu P, Lv W-F, Qiu X-H, Yao J-L, Gu J-F, et al. CT manifestations of coronavirus disease-2019: A retrospective analysis of 73 cases by disease severity. *European Journal of Radiology*. 2020 May;126:108941.
53. Wan S, Xiang Y, Fang W, Zheng Y, Li B, Hu Y, et al. Clinical features and treatment of COVID-19 patients in northeast Chongqing. *Journal of Medical Virology* [Internet]. 2020 Apr 1 [cited 2020 May 25]; Available from: <http://doi.wiley.com/10.1002/jmv.25783>
54. Shi Y, Yu X, Zhao H, Wang H, Zhao R, Sheng J. Host susceptibility to severe COVID-19 and establishment of a host risk score: findings of 487 cases outside Wuhan. *Critical Care* [Internet]. 2020 Dec [cited 2020 May 25];24(1). Available from: <https://ccforum.biomedcentral.com/articles/10.1186/s13054-020-2833-7>
55. Li K, Fang Y, Li W, Pan C, Qin P, Zhong Y, et al. CT image visual quantitative evaluation and clinical classification of coronavirus disease (COVID-19). *European Radiology* [Internet]. 2020 Mar 25 [cited 2020 May 25]; Available from: <http://link.springer.com/10.1007/s00330-020-06817-6>
56. Qin C, Zhou L, Hu Z, Zhang S, Yang S, Tao Y, et al. Dysregulation of Immune Response in Patients with COVID-19 in Wuhan, China. *SSRN Electronic Journal* [Internet]. 2020 [cited 2020 May 25]; Available from: <https://www.ssrn.com/abstract=3541136>
57. Huang L, Han R, Ai T, Yu P, Kang H, Tao Q, et al. Serial Quantitative Chest CT Assessment of COVID-19: Deep-Learning Approach. *Radiology: Cardiothoracic Imaging*. 2020 Apr 1;2(2):e200075.
58. Zhang J, Dong X, Cao Y, Yuan Y, Yang Y, Yan Y, et al. Clinical characteristics of 140 patients infected with SARS-CoV-2 in Wuhan, China. *Allergy* [Internet]. 2020 Feb 27 [cited 2020 May 25]; Available from: <https://onlinelibrary.wiley.com/doi/abs/10.1111/all.14238>

59. Zhang G, Zhang J, Wang B, Zhu X, Wang Q, Qiu S. Analysis of clinical characteristics and laboratory findings of 95 cases of 2019 novel coronavirus pneumonia in Wuhan, China: a retrospective analysis. *Respiratory Research* [Internet]. 2020 Dec [cited 2020 May 25];21(1). Available from: <https://respiratory-research.biomedcentral.com/articles/10.1186/s12931-020-01338-8>
60. Chen G, Wu D, Guo W, Cao Y, Huang D, Wang H, et al. Clinical and immunological features of severe and moderate coronavirus disease 2019. *Journal of Clinical Investigation*. 2020 Apr 13;130(5):2620–9.
61. Chu J, Yang N, Wei Y, Yue H, Zhang F, Zhao J, et al. Clinical characteristics of 54 medical staff with COVID-19: A retrospective study in a single center in Wuhan, China. *Journal of Medical Virology* [Internet]. 2020 Apr 6 [cited 2020 May 25]; Available from: <https://onlinelibrary.wiley.com/doi/abs/10.1002/jmv.25793>
62. Yuan J, Zou R, Zeng L, Kou S, Lan J, Li X, et al. The correlation between viral clearance and biochemical outcomes of 94 COVID-19 infected discharged patients. *Inflammation Research*. 2020 Jun;69(6):599–606.
63. Wang L, Li X, Chen H, Yan S, Li D, Li Y, et al. Coronavirus Disease 19 Infection Does Not Result in Acute Kidney Injury: An Analysis of 116 Hospitalized Patients from Wuhan, China. *American Journal of Nephrology*. 2020;51(5):343–8.
64. Han H, Xie L, Liu R, Yang J, Liu F, Wu K, et al. Analysis of heart injury laboratory parameters in 273 COVID-19 patients in one hospital in Wuhan, China. *Journal of Medical Virology* [Internet]. 2020 Apr 15 [cited 2020 May 25]; Available from: <http://doi.wiley.com/10.1002/jmv.25809>
65. Xie H, Zhao J, Lian N, Lin S, Xie Q, Zhuo H. Clinical characteristics of non-ICU hospitalized patients with coronavirus disease 2019 and liver injury: A retrospective study. *Liver International* [Internet]. 2020 Apr 12 [cited 2020 May 25]; Available from: <http://doi.wiley.com/10.1111/liv.14449>
66. Cai Q, Huang D, Ou P, Yu H, Zhu Z, Xia Z, et al. COVID-19 in a designated infectious diseases hospital outside Hubei Province, China. *Allergy* [Internet]. 2020 Apr 17 [cited 2020 May 25]; Available from: <https://onlinelibrary.wiley.com/doi/abs/10.1111/all.14309>
67. Zhang Y, Zheng L, Liu L, Zhao M, Xiao J, Zhao Q. Liver impairment in COVID-19 patients: A retrospective analysis of 115 cases from a single centre in Wuhan city, China. *Liver International* [Internet]. 2020 Apr 28 [cited 2020 May 25]; Available from: <https://onlinelibrary.wiley.com/doi/abs/10.1111/liv.14455>
68. Wang L. C-reactive protein levels in the early stage of COVID-19. *Médecine et Maladies Infectieuses*. 2020 Jun;50(4):332–4.



69. Chen X, Yang Y, Huang M, Liu L, Zhang X, Xu J, et al. Differences between COVID-19 and suspected then confirmed SARS-CoV-2-negative pneumonia: a retrospective study from a single center. *Journal of Medical Virology* [Internet]. 2020 Apr 1 [cited 2020 May 25]; Available from: <http://doi.wiley.com/10.1002/jmv.25810>
70. Zheng F, Tang W, Li H. Clinical characteristics of 161 cases of corona virus disease 2019 (COVID-19) in Changsha. :7.
71. Deng Q, Hu B, Zhang Y, Wang H, Zhou X, Hu W, et al. Suspected myocardial injury in patients with COVID-19: Evidence from front-line clinical observation in Wuhan, China. *International Journal of Cardiology* [Internet]. 2020 Apr [cited 2020 May 25]; Available from: <https://linkinghub.elsevier.com/retrieve/pii/S0167527320311153>
72. Li H, Xiang X, Ren H, Xu L, Zhao L, Chen X, et al. Serum Amyloid A is a biomarker of severe Coronavirus Disease and poor prognosis. *Journal of Infection*. 2020 Jun;80(6):646–55.
73. Zou Y, Guo H, Zhang Y, Zhang Z, Liu Y, Wang J, et al. Analysis of coagulation parameters in patients with COVID-19 in Shanghai, China. *BioScience Trends* [Internet]. 2020 [cited 2020 May 25]; Available from: [https://www.jstage.jst.go.jp/article/bst/advpub/0/advpub\\_2020.03086/\\_article](https://www.jstage.jst.go.jp/article/bst/advpub/0/advpub_2020.03086/_article)
74. Shi F, Wu T, Zhu X, Ge Y, Zeng X, Chi Y, et al. Association of viral load with serum biomarkers among COVID-19 cases. *Virology*. 2020 Jul;546:122–6.
75. Wang G, Wu C, Zhang Q, Wu F, Yu B, Lv J, et al. C-Reactive Protein Level May Predict the Risk of COVID-19 Aggravation. *Open Forum Infectious Diseases* [Internet]. 2020 May 1 [cited 2020 May 25];7(5). Available from: <https://academic.oup.com/ofid/article/doi/10.1093/ofid/ofaa153/5826961>
76. Ji M, Yuan L, Shen W, Lv J, Li Y, Li M, et al. Characteristics of disease progress in patients with coronavirus disease 2019 in Wuhan, China. *Epidemiology and Infection* [Internet]. 2020 [cited 2020 May 25];148. Available from: [https://www.cambridge.org/core/product/identifier/S0950268820000977/type/journal\\_article](https://www.cambridge.org/core/product/identifier/S0950268820000977/type/journal_article)
77. Shen L, Li S, Zhu Y, Zhao J, Tang X, Li H, et al. Clinical and laboratory-derived parameters of 119 hospitalized patients with coronavirus disease 2019 in Xiangyang, Hubei Province, China. *Journal of Infection* [Internet]. 2020 Apr [cited 2020 May 25]; Available from: <https://linkinghub.elsevier.com/retrieve/pii/S0163445320301663>
78. Yang F, Shi S, Zhu J, Shi J, Dai K, Chen X. Clinical characteristics and outcomes of cancer patients with COVID-19. *Journal of Medical Virology* [Internet]. 2020 May 5 [cited 2020 May 25]; Available from: <https://onlinelibrary.wiley.com/doi/abs/10.1002/jmv.25972>

79. Ma J, Yin J, Qian Y, Wu Y. Clinical characteristics and prognosis in cancer patients with COVID-19: A single center's retrospective study. *Journal of Infection* [Internet]. 2020 Apr [cited 2020 May 25]; Available from: <https://linkinghub.elsevier.com/retrieve/pii/S0163445320302140>
80. Chen Q, Zheng Z, Zhang C, Zhang X, Wu H, Wang J, et al. Clinical characteristics of 145 patients with corona virus disease 2019 (COVID-19) in Taizhou, Zhejiang, China. *Infection* [Internet]. 2020 Apr 28 [cited 2020 May 25]; Available from: <http://link.springer.com/10.1007/s15010-020-01432-5>
81. Colaneri M, Sacchi P, Zuccaro V, Biscarini S, Sachs M, Roda S, et al. Clinical characteristics of coronavirus disease (COVID-19) early findings from a teaching hospital in Pavia, North Italy, 21 to 28 February 2020. *Eurosurveillance* [Internet]. 2020 Apr 23 [cited 2020 May 25];25(16). Available from: <https://www.eurosurveillance.org/content/10.2807/1560-7917.ES.2020.25.16.2000460>
82. Zhao X-Y, Xu X-X, Yin H-S, Hu Q-M, Xiong T, Tang Y-Y, et al. Clinical characteristics of patients with 2019 coronavirus disease in a non-Wuhan area of Hubei Province, China: a retrospective study. *BMC Infectious Diseases* [Internet]. 2020 Dec [cited 2020 May 25];20(1). Available from: <https://bmcinfectdis.biomedcentral.com/articles/10.1186/s12879-020-05010-w>
83. Chen L, Li Q, Zheng D, Jiang H, Wei Y, Zou L, et al. Clinical Characteristics of Pregnant Women with Covid-19 in Wuhan, China. *New England Journal of Medicine* [Internet]. 2020 Apr 17 [cited 2020 May 25]; Available from: <http://www.nejm.org/doi/10.1056/NEJMc2009226>
84. Sun L, Shen L, Fan J, Gu F, Hu M, An Y, et al. Clinical Features of Patients with Coronavirus Disease 2019 (COVID-19) from a Designated Hospital in Beijing, China. *Journal of Medical Virology* [Internet]. 2020 May 5 [cited 2020 May 25]; Available from: <https://onlinelibrary.wiley.com/doi/abs/10.1002/jmv.25966>
85. Zhu Z, Cai T, Fan L, Lou K, Hua X, Huang Z, et al. Clinical value of immune-inflammatory parameters to assess the severity of coronavirus disease 2019. *International Journal of Infectious Diseases*. 2020 Jun;95:332–9.
86. Liu Y, Liao W, Wan L, Xiang T, Zhang W. Correlation Between Relative Nasopharyngeal Virus RNA Load and Lymphocyte Count Disease Severity in Patients with COVID-19. *Viral Immunology* [Internet]. 2020 Apr 10 [cited 2020 May 25]; Available from: <https://www.liebertpub.com/doi/10.1089/vim.2020.0062>
87. Feng Y, Ling Y, Bai T, Xie Y, Huang J, Li J, et al. COVID-19 with Different Severity: A Multi-center Study of Clinical Features. *American Journal of Respiratory and Critical Care Medicine* [Internet]. 2020 Apr 10 [cited 2020 May 25]; Available from: <https://www.atsjournals.org/doi/10.1164/rccm.202002-0445OC>

88. Zhang R, Ouyang H, Fu L, Wang S, Han J, Huang K, et al. CT features of SARS-CoV-2 pneumonia according to clinical presentation: a retrospective analysis of 120 consecutive patients from Wuhan city. *European Radiology* [Internet]. 2020 Apr 11 [cited 2020 May 25]; Available from: <http://link.springer.com/10.1007/s00330-020-06854-1>
89. Chen X, Zhao B, Qu Y, Chen Y, Xiong J, Feng Y, et al. Detectable serum SARS-CoV-2 viral load (RNAemia) is closely correlated with drastically elevated interleukin 6 (IL-6) level in critically ill COVID-19 patients. *Clinical Infectious Diseases* [Internet]. 2020 Apr 17 [cited 2020 May 25]; Available from: <https://academic.oup.com/cid/advance-article/doi/10.1093/cid/ciaa449/5821311>
90. Wei X, Su J, Yang K, Wei J, Wan H, Cao X, et al. Elevations of serum cancer biomarkers correlate with severity of COVID-19. *Journal of Medical Virology* [Internet]. 2020 Apr 29 [cited 2020 May 25]; Available from: <https://onlinelibrary.wiley.com/doi/abs/10.1002/jmv.25957>
91. Zheng Y, Xiong C, Liu Y, Qian X, Tang Y, Liu L, et al. Epidemiological and clinical characteristics analysis of COVID-19 in the surrounding areas of Wuhan, Hubei Province in 2020. *Pharmacological Research*. 2020 Jul 1;157:104821.
92. Wang R, Pan M, Zhang X, Han M, Fan X, Zhao F, et al. Epidemiological and clinical features of 125 Hospitalized Patients with COVID-19 in Fuyang, Anhui, China. *International Journal of Infectious Diseases*. 2020 Jun;95:421–8.
93. Yao Z, Zheng Z, Wu K, Junhua Z. Immune environment modulation in pneumonia patients caused by coronavirus: SARS-CoV, MERS-CoV and SARS-CoV-2. *Aging*. 2020 May 2;12(9):7639–51.
94. Lei F, Liu Y, Zhou F, Qin J, Zhang P, Zhu L, et al. Longitudinal association between markers of liver injury and mortality in COVID-19 in China. *Hepatology* [Internet]. 2020 May 2 [cited 2020 May 25]; Available from: <https://onlinelibrary.wiley.com/doi/abs/10.1002/hep.31301>
95. Lu L, Xiong W, Liu D, Liu J, Yang D, Li N, et al. New onset acute symptomatic seizure and risk factors in coronavirus disease 2019: A retrospective multicenter study. *Epilepsia* [Internet]. 2020 May 2 [cited 2020 May 25]; Available from: <https://onlinelibrary.wiley.com/doi/abs/10.1111/epi.16524>
96. Yang Y, Shen C, Li J, Yuan J, Wei J, Huang F, et al. Plasma IP-10 and MCP-3 levels are highly associated with disease severity and predict the progression of COVID-19. *Journal of Allergy and Clinical Immunology* [Internet]. 2020 Apr [cited 2020 May 25]; Available from: <https://linkinghub.elsevier.com/retrieve/pii/S0091674920305765>
97. Bi X, Su Z, Yan H, Du J, Wang J, Chen L, et al. Prediction of severe illness due to COVID-19 based on an analysis of initial Fibrinogen to Albumin Ratio and Platelet count. *Platelets*. 2020 May 5;1–6.

98. Liu F, Li L, Xu M, Wu J, Luo D, Zhu Y, et al. Prognostic value of interleukin-6, C-reactive protein, and procalcitonin in patients with COVID-19. *Journal of Clinical Virology*. 2020 Jun;127:104370.
99. Pei G, Zhang Z, Peng J, Liu L, Zhang C, Yu C, et al. Renal Involvement and Early Prognosis in Patients with COVID-19 Pneumonia. *Journal of the American Society of Nephrology*. 2020 Apr 28;ASN.2020030276.
100. Hu L, Chen S, Fu Y, Gao Z, Long H, Wang J, et al. Risk Factors Associated with Clinical Outcomes in 323 COVID-19 Hospitalized Patients in Wuhan, China. *Clinical Infectious Diseases* [Internet]. 2020 May 3 [cited 2020 May 25]; Available from: <https://academic.oup.com/cid/advance-article/doi/10.1093/cid/ciaa539/5828282>
101. Liu X, Zhou H, Zhou Y, Wu X, Zhao Y, Lu Y, et al. Risk factors associated with disease severity and length of hospital stay in COVID-19 patients. *Journal of Infection* [Internet]. 2020 Apr [cited 2020 May 25]; Available from: <https://linkinghub.elsevier.com/retrieve/pii/S0163445320302164>
102. Wei Y-Y, Wang R-R, Zhang D-W, Tu Y-H, Chen C-S, Ji S, et al. Risk factors for severe COVID-19: Evidence from 167 hospitalized patients in Anhui, China. *Journal of Infection* [Internet]. 2020 Apr [cited 2020 May 25]; Available from: <https://linkinghub.elsevier.com/retrieve/pii/S016344532030219X>
103. Li X, Xu S, Yu M, Wang K, Tao Y, Zhou Y, et al. Risk factors for severity and mortality in adult COVID-19 inpatients in Wuhan. *Journal of Allergy and Clinical Immunology* [Internet]. 2020 Apr [cited 2020 May 25]; Available from: <https://linkinghub.elsevier.com/retrieve/pii/S0091674920304954>
104. Zheng Y, Zhang Y, Chi H, Chen S, Peng M, Luo L, et al. The hemocyte counts as a potential biomarker for predicting disease progression in COVID-19: a retrospective study. *Clinical Chemistry and Laboratory Medicine (CCLM)* [Internet]. 2020 Apr 29 [cited 2020 May 25];0(0). Available from: <https://www.degruyter.com/view/journals/cclm/ahead-of-print/article-10.1515-cclm-2020-0377/article-10.1515-cclm-2020-0377.xml>
105. Wang F, Hou H, Luo Y, Tang G, Wu S, Huang M, et al. The laboratory tests and host immunity of COVID-19 patients with different severity of illness. *JCI Insight* [Internet]. 2020 May 21 [cited 2020 May 25];5(10). Available from: <https://insight.jci.org/articles/view/137799>
106. Lyu P, Liu X, Zhang R, Shi L, Gao J. The performance of chest CT in evaluating the clinical severity of COVID-19 pneumonia: identifying critical cases based on CT characteristics. *Investigative Radiology*. 2020 Apr;1.

107. Liu R, Ma Q, Han H, Su H, Liu F, Wu K, et al. The value of urine biochemical parameters in the prediction of the severity of coronavirus disease 2019. *Clinical Chemistry and Laboratory Medicine (CCLM)* [Internet]. 2020 Apr 14 [cited 2020 May 25];0(0). Available from: <https://www.degruyter.com/view/journals/cclm/ahead-of-print/article-10.1515-cclm-2020-0220/article-10.1515-cclm-2020-0220.xml>
108. Hou H, Zhang B, Huang H, Luo Y, Wu S, Tang G, et al. Using IL-2R/lymphocytes for predicting the clinical progression of patients with COVID-19. *Clinical & Experimental Immunology* [Internet]. 2020 May 15 [cited 2020 May 25]; Available from: <https://onlinelibrary.wiley.com/doi/abs/10.1111/cei.13450>
109. Zheng S, Fan J, Yu F, Feng B, Lou B, Zou Q, et al. Viral load dynamics and disease severity in patients infected with SARS-CoV-2 in Zhejiang province, China, January-March 2020: retrospective cohort study. *BMJ*. 2020 Apr 21;m1443.
110. Metlay JP, Waterer GW, Long AC, Anzueto A, Brozek J, Crothers K, et al. Diagnosis and Treatment of Adults with Community-acquired Pneumonia. An Official Clinical Practice Guideline of the American Thoracic Society and Infectious Diseases Society of America. *Am J Respir Crit Care Med*. 2019 Oct 1;200(7):e45–67.
111. Lin L, Li TS. Interpretation of “Guidelines for the Diagnosis and Treatment of Novel Coronavirus (2019-nCoV) Infection by the National Health Commission (Trial Version 5).” *Zhonghua Yi Xue Za Zhi*. 2020;100(0):E001–E001.
112. Singer M, Deutschman CS, Seymour CW, Shankar-Hari M, Annane D, Bauer M, et al. The Third International Consensus Definitions for Sepsis and Septic Shock (Sepsis-3). *JAMA*. 2016 Feb 23;315(8):801–10.
113. Fourth Universal Definition of Myocardial Infarction [Internet]. American College of Cardiology. [cited 2020 Jun 17]. Available from: <http://www.acc.org/latest-in-cardiology/ten-points-to-remember/2018/08/24/09/fourth-universal-definition-of-mi-esc-2018>
114. Acute Respiratory Distress Syndrome: The Berlin Definition. *JAMA*. 2012 Jun 20;307(23):2526–33.
115. Kellum JA, Lameire N, Aspelin P, Barsoum RS, Burdmann EA, Goldstein SL, et al. Kidney disease: Improving global outcomes (KDIGO) acute kidney injury work group. KDIGO clinical practice guideline for acute kidney injury. *Kidney International Supplements*. 2012 Mar;2(1):1–138.
